# Supplementary material for: Genome-wide association study of over 40,000 bipolar disorder cases provides new insights into the underlying biology
Source: bioRxiv or medRxiv preprint supplement (doi:10.1101/2020.09.17.20187054), 2021-03-27

rs2126180

G/A

1:61105668

het\_P: 0.694

het\_I: 0.0

|                  | ngt      | info        | p_value         | f_ca(n)             | f_co(n)              | ln(OR)         | STDerr        |
|------------------|----------|-------------|-----------------|---------------------|----------------------|----------------|---------------|
| bmau.            | 0        | 0.98        | 0.96            | 0.544(329)          | 0.546(1810)          | 0.00429        | 0.0864        |
| bm2.             | 0        | 0.97        | 0.119           | 0.529(181)          | 0.595(478)           | -0.251         | 0.162         |
| bm3.             | 0        | 0.96        | 0.496           | 0.550(489)          | 0.561(880)           | -0.0572        | 0.084         |
| bmpo.            | 0        | 1.01        | 0.0336          | 0.573(410)          | 0.612(689)           | -0.207         | 0.0973        |
| bmsp.            | 0        | 1.01        | 0.838           | 0.543(253)          | 0.546(291)           | 0.0279         | 0.136         |
| bonn.            | 0        | 1.03        | 0.511           | 0.564(669)          | 0.577(1246)          | -0.0452        | 0.0689        |
| butr.            | 0        | 1.09        | 0.0789          | 0.540(236)          | 0.600(236)           | -0.222         | 0.127         |
| dub1.            | 0        | 1.00        | 0.0793          | 0.514(1796)         | 0.547(1796)          | -0.0437        | 0.127         |
| edf1.            | 0        | 0.98        | 0.318           | 0.499(275)          | 0.531(272)           | -0.129         | 0.129         |
| fat2.            | 0        | 1.01        | 0.13            | 0.537(722)          | 0.563(1027)          | -0.106         | 0.07          |
| fran.            | 0        | 0.95        | 0.944           | 0.541(451)          | 0.537(1630)          | 0.00548        | 0.0789        |
| gain.            | 0        | 1.01        | 0.624           | 0.511(706)          | 0.520(593)           | -0.0386        | 0.0788        |
| gsk1.            | 0        | 0.99        | 0.295           | 0.532(706)          | 0.550(899)           | -0.0755        | 0.0721        |
| hai2.            | 0        | 1.04        | 0.0443          | 0.519(410)          | 0.563(479)           | -0.198         | 0.0984        |
| icuk.            | 0        | 1.00        | 0.0126          | 0.510(2456)         | 0.535(4069)          | -0.0916        | 0.0367        |
| jsi5.            | 0        | 1.00        | 0.162           | 0.535(646)          | 0.559(643)           | -0.106         | 0.0793        |
| may1.            | 0        | 0.99        | 0.104           | 0.527(929)          | 0.557(759)           | -0.118         | 0.0722        |
| mich.            | 0        | 1.02        | 0.593           | 0.527(481)          | 0.544(399)           | -0.0513        | 0.0961        |
| pf1e.            | 0        | 0.96        | 0.223           | 0.526(375)          | 0.495(346)           | 0.135          | 0.111         |
| rom3.            | 0        | 1.03        | 0.62            | 0.578(233)          | 0.601(198)           | -0.0713        | 0.143         |
| si2c.            | 0        | 0.97        | 0.927           | 0.537(628)          | 0.546(1219)          | -0.00682       | 0.0742        |
| stp1.            | 0        | 0.96        | 0.94            | 0.553(920)          | 0.553(973)           | -0.00511       | 0.0676        |
| swa2.            | 0        | 1.00        | 0.0847          | 0.534(865)          | 0.566(2252)          | -0.133         | 0.0593        |
| swei.            | 0        | 1.01        | 0.388           | 0.550(1278)         | 0.555(3669)          | -0.0403        | 0.0468        |
| top7.            | 0        | 0.99        | 0.746           | 0.535(416)          | 0.551(350)           | -0.0356        | 0.11          |
| top8.            | 0        | 1.06        | 0.28            | 0.605(148)          | 0.562(291)           | 0.157          | 0.145         |
| uc12.            | 0        | 1.01        | 0.809           | 0.529(726)          | 0.532(693)           | -0.0183        | 0.0754        |
| uc1o.            | 0        | 0.92        | 0.894           | 0.526(427)          | 0.527(488)           | -0.0132        | 0.0993        |
| uktr.            | 0        | 1.20        | 0.632           | 0.486(130)          | 0.508(130)           | -0.0767        | 0.16          |
| umr4.            | 0        | 1.02        | 0.621           | 0.588(565)          | 0.578(569)           | 0.0421         | 0.0852        |
| usc2.            | 0        | 1.01        | 0.884           | 0.542(1293)         | 0.553(1156)          | -0.00854       | 0.0585        |
| wlcc.            | 0        | 0.97        | 0.00121         | 0.490(1644)         | 0.540(1641)          | -0.167         | 0.0516        |
| jea2.            | 0        | 0.95        | 0.3             | 0.614(372)          | 0.592(628)           | 0.102          | 0.0986        |
| kfo4.            | 0        | 0.96        | 0.585           | 0.564(247)          | 0.577(288)           | -0.0742        | 0.136         |
| tgco2.           | 0        | 0.96        | 0.347           | 0.528(1032)         | 0.548(499)           | -0.0749        | 0.0796        |
| bdrs.            | 0        | 0.95        | 0.0213          | 0.516(218)          | 0.588(684)           | -0.269         | 0.117         |
| dutch.           | 0        | 0.99        | 0.125           | 0.527(831)          | 0.553(953)           | -0.105         | 0.0684        |
| gaw1.            | 0        | 0.97        | 0.153           | 0.537(268)          | 0.581(268)           | -0.159         | 0.112         |
| germ1.           | 0        | 1.01        | 0.948           | 0.562(219)          | 0.562(992)           | -0.00723       | 0.109         |
| gpcw1.           | 0        | 0.99        | 0.507           | 0.538(447)          | 0.550(2092)          | -0.0497        | 0.0749        |
| neuc1.           | 0        | 1.01        | 0.986           | 0.528(215)          | 0.525(750)           | -0.002         | 0.112         |
| spsp3.           | 0        | 1.00        | 0.863           | 0.554(153)          | 0.546(2337)          | 0.0207         | 0.12          |
| swed1.           | 0        | 1.00        | 0.19            | 0.547(2909)         | 0.558(2844)          | -0.0497        | 0.038         |
| ukwa1.           | 0        | 0.99        | 0.0678          | 0.524(2789)         | 0.543(2372)          | -0.0736        | 0.0403        |
| usa4.            | 0        | 0.97        | 0.651           | 0.537(2956)         | 0.533(2930)          | 0.0171         | 0.0376        |
| usa5.            | 0        | 0.98        | 0.584           | 0.532(1107)         | 0.526(1316)          | 0.0332         | 0.0606        |
| deCODE.          | 0        | 1.00        | 0.19            | 0.534(1972)         | 0.534(192602)        | -0.044         | 0.0336        |
| EstonianBiobank. | 1        | 1.00        | 0.876           | 0.595(407)          | 0.594(17209)         | -0.0114        | 0.0728        |
| HUNT.            | 0        | 1.00        | 0.00112         | 0.527(905)          | 0.566(41914)         | -0.158         | 0.0485        |
| iPSYCH.          | 0        | 0.98        | 0.621           | 0.548(1758)         | 0.553(5937)          | -0.0193        | 0.039         |
| UKBiobank.       | 0        | 1.00        | 0.548           | 0.523(1454)         | 0.531(58113)         | -0.103         | 0.172         |
| bmrom.           | 0        | 1.05        | 0.056           | 0.603(2125)         | 0.626(121)           | -0.0935        | 0.16          |
| bmrus.           | 0        | 1.00        | 0.162           | 0.609(522)          | 0.642(460)           | -0.133         | 0.0953        |
| graza.           | 0        | 0.96        | 0.289           | 0.563(144)          | 0.515(66)            | 0.236          | 0.223         |
| greek.           | 0        | 0.95        | 0.688           | 0.565(186)          | 0.581(87)            | -0.078         | 0.194         |
| norgs.           | 0        | 1.01        | 0.629           | 0.535(101)          | 0.538(315)           | -0.0833        | 0.172         |
| noroe.           | 0        | 0.98        | 0.261           | 0.526(313)          | 0.547(4367)          | -0.0974        | 0.0866        |
|                  | <b>1</b> | <b>0.99</b> | <b>1.62e-09</b> | <b>0.536(41917)</b> | <b>0.543(371549)</b> | <b>-0.0566</b> | <b>0.0094</b> |

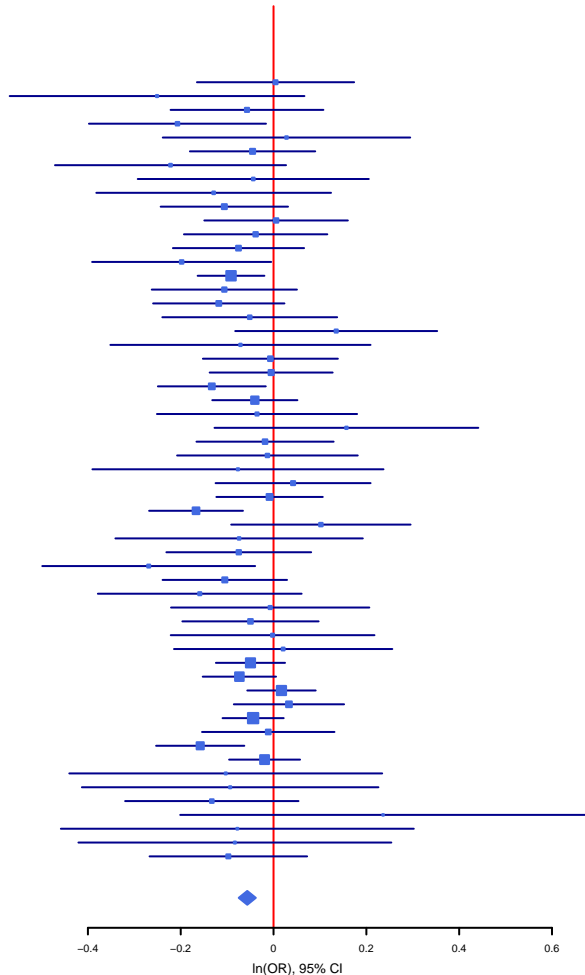

rs10737496

C/T

1:163745389

het\_P:

0.193

het\_I:

13.8

|                  | ngt | info | p_value | f_ca(n)     | f_co(n)       | ln(OR)  | STDerr |
|------------------|-----|------|---------|-------------|---------------|---------|--------|
| bmau.            | 0   | 0.97 | 0.887   | 0.456(329)  | 0.458(1810)   | -0.0123 | 0.0864 |
| bm2.             | 0   | 0.98 | 0.769   | 0.486(181)  | 0.449(478)    | 0.0456  | 0.155  |
| bm3.             | 0   | 1.02 | 0.274   | 0.470(489)  | 0.449(880)    | 0.0888  | 0.0812 |
| bmpp.            | 0   | 1.00 | 0.0282  | 0.514(410)  | 0.476(689)    | 0.209   | 0.0951 |
| bmsp.            | 0   | 0.97 | 0.0737  | 0.515(253)  | 0.472(291)    | 0.251   | 0.14   |
| bonn.            | 0   | 1.01 | 0.795   | 0.477(669)  | 0.469(1246)   | 0.0179  | 0.0691 |
| butr.            | 0   | 1.00 | 0.362   | 0.475(236)  | 0.504(236)    | -0.119  | 0.131  |
| club1.           | 0   | 0.92 | 0.698   | 0.511(150)  | 0.454(796)    | 0.234   | 0.133  |
| ed1.             | 0   | 0.94 | 0.736   | 0.459(275)  | 0.478(272)    | -0.0444 | 0.131  |
| fat2.            | 0   | 0.98 | 0.636   | 0.471(722)  | 0.474(1027)   | -0.0337 | 0.071  |
| fran.            | 0   | 1.00 | 0.825   | 0.497(451)  | 0.492(1630)   | 0.017   | 0.0767 |
| gain.            | 0   | 0.96 | 0.729   | 0.478(706)  | 0.471(593)    | 0.0282  | 0.0813 |
| gsk1.            | 0   | 1.00 | 0.0961  | 0.509(706)  | 0.480(899)    | 0.119   | 0.0715 |
| ha2.             | 0   | 1.04 | 0.225   | 0.478(410)  | 0.456(479)    | 0.118   | 0.0972 |
| icuk.            | 0   | 1.00 | 0.016   | 0.482(2458) | 0.462(4069)   | 0.0881  | 0.0366 |
| jst5.            | 0   | 0.95 | 0.748   | 0.483(646)  | 0.467(643)    | -0.025  | 0.0781 |
| may1.            | 0   | 1.00 | 0.831   | 0.467(929)  | 0.457(759)    | 0.0153  | 0.0715 |
| mich.            | 0   | 0.98 | 0.454   | 0.460(481)  | 0.444(399)    | 0.0734  | 0.0981 |
| pf1e.            | 0   | 1.02 | 0.551   | 0.449(375)  | 0.470(346)    | -0.0646 | 0.108  |
| rom3.            | 0   | 0.95 | 0.453   | 0.504(233)  | 0.472(198)    | 0.11    | 0.147  |
| st2c.            | 0   | 0.95 | 0.0182  | 0.480(628)  | 0.444(1219)   | 0.176   | 0.0747 |
| stp1.            | 0   | 0.96 | 0.209   | 0.479(920)  | 0.480(973)    | 0.084   | 0.0669 |
| sw2.             | 0   | 0.97 | 0.448   | 0.440(885)  | 0.439(2252)   | -0.0103 | 0.0601 |
| swei.            | 0   | 1.00 | 0.445   | 0.433(1278) | 0.427(3669)   | 0.0359  | 0.0471 |
| top7.            | 0   | 1.01 | 0.0462  | 0.413(416)  | 0.467(350)    | -0.218  | 0.109  |
| top8.            | 0   | 1.00 | 0.283   | 0.415(148)  | 0.457(291)    | -0.16   | 0.149  |
| ucl2.            | 0   | 0.99 | 0.473   | 0.466(726)  | 0.456(693)    | 0.0547  | 0.0761 |
| uclo.            | 0   | 0.99 | 0.148   | 0.493(427)  | 0.460(488)    | 0.139   | 0.0963 |
| uktr.            | 0   | 1.01 | 0.0812  | 0.500(130)  | 0.423(130)    | 0.309   | 0.177  |
| ume4.            | 0   | 1.00 | 0.119   | 0.432(565)  | 0.401(569)    | 0.135   | 0.0667 |
| usc2.            | 0   | 0.98 | 0.699   | 0.471(1293) | 0.467(1156)   | 0.0229  | 0.0593 |
| wtc.             | 0   | 0.97 | 0.38    | 0.476(1644) | 0.464(1641)   | 0.045   | 0.0513 |
| jea2.            | 0   | 0.98 | 0.341   | 0.474(372)  | 0.450(628)    | 0.091   | 0.0956 |
| kfo4.            | 0   | 0.96 | 0.132   | 0.479(247)  | 0.436(288)    | 0.205   | 0.136  |
| tgco2.           | 0   | 1.03 | 0.72    | 0.461(1032) | 0.465(499)    | -0.0277 | 0.0771 |
| bdtrs.           | 0   | 1.03 | 0.0159  | 0.509(218)  | 0.438(684)    | 0.268   | 0.111  |
| dutch.           | 0   | 1.01 | 0.577   | 0.466(831)  | 0.457(953)    | 0.0377  | 0.0676 |
| gawil.           | 0   | 0.97 | 0.441   | 0.503(268)  | 0.476(502)    | 0.0853  | 0.111  |
| germ1.           | 0   | 0.99 | 0.198   | 0.489(219)  | 0.454(992)    | 0.14    | 0.109  |
| gpw1.            | 0   | 0.99 | 0.529   | 0.457(447)  | 0.470(2092)   | -0.0473 | 0.0751 |
| neuc1.           | 0   | 1.01 | 0.00146 | 0.393(215)  | 0.485(750)    | -0.359  | 0.113  |
| spsp3.           | 0   | 1.04 | 0.915   | 0.490(153)  | 0.492(2337)   | 0.0124  | 0.117  |
| swed1.           | 0   | 0.99 | 0.0972  | 0.446(2909) | 0.432(2844)   | 0.0635  | 0.0383 |
| ukwa1.           | 0   | 1.00 | 0.0216  | 0.479(2789) | 0.455(2372)   | 0.092   | 0.0401 |
| usaw4.           | 0   | 1.00 | 0.155   | 0.474(2956) | 0.462(2930)   | 0.0529  | 0.0374 |
| usaw5.           | 0   | 0.98 | 0.0272  | 0.485(1107) | 0.455(1316)   | 0.134   | 0.0608 |
| deCODE.          | 0   | 1.00 | 0.0397  | 0.439(1972) | 0.439(192602) | 0.0686  | 0.0333 |
| EstonianBiobank. | 1   | 0.98 | 0.667   | 0.436(407)  | 0.429(17209)  | 0.0312  | 0.0726 |
| HUNT.            | 0   | 1.00 | 0.227   | 0.449(905)  | 0.433(41914)  | 0.0587  | 0.0486 |
| iPSYCH.          | 0   | 0.98 | 0.209   | 0.454(1758) | 0.442(5937)   | 0.0482  | 0.0391 |
| UKBiobank.       | 0   | 1.00 | 0.0779  | 0.463(1454) | 0.462(58113)  | 0.0492  | 0.171  |
| bmim.            | 0   | 0.98 | 0.0526  | 0.473(225)  | 0.452(121)    | -0.32   | 0.168  |
| bmrs.            | 0   | 0.96 | 0.325   | 0.478(522)  | 0.452(460)    | 0.0931  | 0.0946 |
| graza.           | 0   | 0.92 | 0.548   | 0.447(144)  | 0.424(66)     | 0.136   | 0.226  |
| greek.           | 0   | 0.94 | 0.458   | 0.530(186)  | 0.499(87)     | 0.143   | 0.193  |
| norgs.           | 0   | 0.93 | 0.443   | 0.429(101)  | 0.458(315)    | -0.139  | 0.181  |
| noroe.           | 0   | 0.99 | 0.61    | 0.447(313)  | 0.442(4367)   | 0.0442  | 0.0867 |

1 0.99 7.17e-09 0.467(41917) 0.444(371549) 0.0542 0.0094

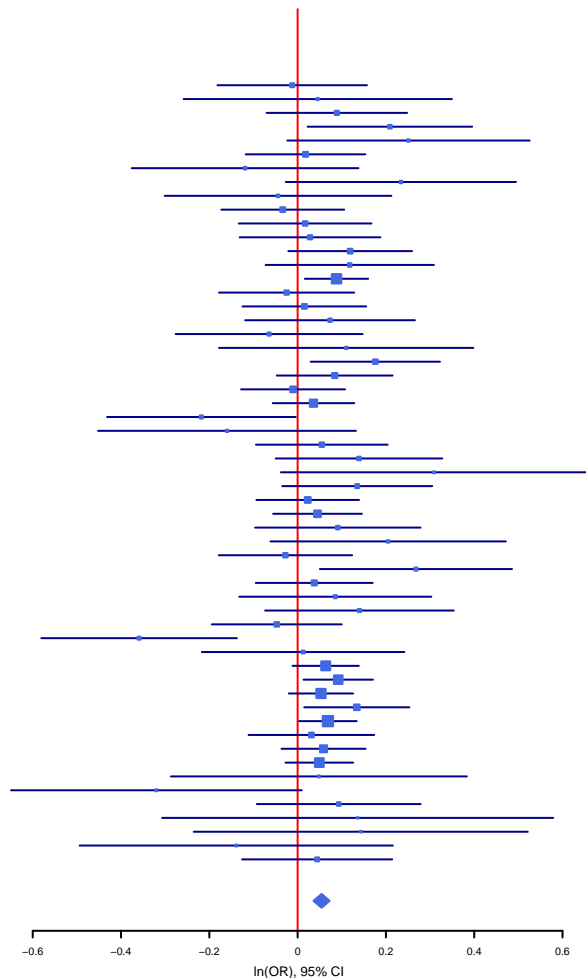

rs4619651

G/A

2:97416153

het\_P:

0.0175

het\_I:

30.5

|                  | ngt | info | p_value | f_ca(n)     | f_co(n)       | ln(OR)  | STDerr |
|------------------|-----|------|---------|-------------|---------------|---------|--------|
| bmau.            | 0   | 0.99 | 0.441   | 0.699(329)  | 0.684(1810)   | 0.0719  | 0.0933 |
| bmg2.            | 0   | 1.04 | 0.412   | 0.679(181)  | 0.661(478)    | -0.135  | 0.165  |
| bmg3.            | 0   | 1.02 | 0.559   | 0.676(489)  | 0.671(880)    | 0.0504  | 0.0863 |
| bmpo.            | 0   | 0.97 | 0.907   | 0.676(410)  | 0.666(689)    | 0.0121  | 0.103  |
| bmsp.            | 0   | 0.89 | 0.125   | 0.796(253)  | 0.732(291)    | 0.265   | 0.172  |
| bonn.            | 0   | 1.00 | 0.0283  | 0.689(669)  | 0.641(1246)   | 0.164   | 0.0749 |
| butr.            | 0   | 0.98 | 0.551   | 0.733(236)  | 0.750(236)    | -0.0896 | 0.15   |
| club1.           | 0   | 1.00 | 0.0097  | 0.792(150)  | 0.792(150)    | 0.156   | 0.155  |
| edl1.            | 0   | 1.07 | 0.216   | 0.713(275)  | 0.682(272)    | 0.164   | 0.133  |
| fat2.            | 0   | 0.97 | 0.0623  | 0.710(722)  | 0.681(1027)   | 0.144   | 0.0775 |
| fran.            | 0   | 1.00 | 0.0576  | 0.743(451)  | 0.707(1630)   | 0.165   | 0.087  |
| gain.            | 0   | 1.05 | 0.0583  | 0.716(706)  | 0.677(593)    | 0.161   | 0.0848 |
| gsk1.            | 0   | 1.00 | 0.616   | 0.699(706)  | 0.695(899)    | 0.0392  | 0.0782 |
| haI2.            | 0   | 0.99 | 0.524   | 0.686(410)  | 0.719(479)    | -0.0698 | 0.11   |
| icuk.            | 0   | 0.97 | 0.14    | 0.694(2456) | 0.676(4069)   | 0.0592  | 0.0401 |
| jst5.            | 0   | 1.04 | 0.0751  | 0.715(646)  | 0.681(643)    | 0.157   | 0.0856 |
| may1.            | 0   | 1.02 | 0.793   | 0.696(929)  | 0.677(759)    | 0.02    | 0.0765 |
| mich.            | 0   | 0.92 | 0.239   | 0.720(481)  | 0.692(399)    | 0.131   | 0.111  |
| pf1e.            | 0   | 0.99 | 0.388   | 0.660(375)  | 0.672(346)    | -0.1    | 0.116  |
| rom3.            | 0   | 1.05 | 0.593   | 0.755(233)  | 0.765(198)    | -0.0875 | 0.164  |
| sl2c.            | 0   | 1.02 | 0.657   | 0.718(628)  | 0.719(1219)   | 0.0358  | 0.0806 |
| stp1.            | 0   | 0.94 | 0.0347  | 0.714(920)  | 0.682(973)    | 0.158   | 0.075  |
| swa2.            | 0   | 1.01 | 0.0817  | 0.653(885)  | 0.632(2252)   | 0.106   | 0.061  |
| swei.            | 0   | 1.00 | 0.0118  | 0.661(1278) | 0.630(3669)   | 0.124   | 0.0492 |
| top7.            | 0   | 1.06 | 0.558   | 0.645(416)  | 0.617(350)    | 0.0643  | 0.11   |
| top8.            | 0   | 0.97 | 0.0911  | 0.655(148)  | 0.600(291)    | 0.263   | 0.156  |
| ucl2.            | 0   | 1.00 | 0.885   | 0.656(726)  | 0.648(693)    | 0.0115  | 0.0796 |
| ucl0.            | 0   | 0.99 | 0.745   | 0.698(427)  | 0.693(488)    | 0.034   | 0.104  |
| uktr.            | 0   | 0.99 | 0.0714  | 0.736(130)  | 0.663(130)    | 0.353   | 0.196  |
| ume4.            | 0   | 1.01 | 0.743   | 0.656(565)  | 0.661(569)    | -0.0291 | 0.0691 |
| usc2.            | 0   | 1.03 | 0.288   | 0.713(1293) | 0.693(1156)   | 0.068   | 0.064  |
| wtc.             | 0   | 1.00 | 0.0368  | 0.699(1644) | 0.671(1641)   | 0.114   | 0.0546 |
| jea2.            | 0   | 0.95 | 0.0915  | 0.685(372)  | 0.650(628)    | 0.175   | 0.103  |
| kfo4.            | 0   | 0.93 | 0.0777  | 0.700(247)  | 0.660(288)    | 0.263   | 0.149  |
| tgco2.           | 0   | 0.99 | 0.757   | 0.695(1032) | 0.697(499)    | -0.0264 | 0.0854 |
| bdtrs.           | 0   | 1.02 | 0.843   | 0.656(218)  | 0.655(684)    | -0.0232 | 0.117  |
| dutch.           | 0   | 0.99 | 0.0727  | 0.676(631)  | 0.651(953)    | 0.13    | 0.0723 |
| gawli.           | 0   | 1.02 | 0.0817  | 0.689(268)  | 0.689(592)    | -0.0011 | 0.116  |
| germ1.           | 0   | 1.02 | 0.00328 | 0.738(219)  | 0.662(992)    | 0.354   | 0.12   |
| gpw1.            | 0   | 1.01 | 0.811   | 0.713(447)  | 0.709(2092)   | 0.0195  | 0.0817 |
| neuc1.           | 0   | 1.03 | 0.0128  | 0.751(215)  | 0.693(750)    | 0.311   | 0.125  |
| spsp3.           | 0   | 0.99 | 0.331   | 0.781(153)  | 0.755(2337)   | 0.14    | 0.144  |
| swed1.           | 0   | 0.98 | 0.00287 | 0.655(2909) | 0.633(2844)   | 0.119   | 0.0399 |
| ukwa1.           | 0   | 0.97 | 0.403   | 0.699(2789) | 0.698(2372)   | 0.0368  | 0.044  |
| usaw4.           | 0   | 1.01 | 0.175   | 0.727(2956) | 0.717(2930)   | 0.0561  | 0.0414 |
| usaw5.           | 0   | 1.00 | 0.652   | 0.711(1107) | 0.721(1316)   | 0.0301  | 0.0669 |
| deCODE.          | 0   | 1.00 | 0.326   | 0.674(1972) | 0.674(192602) | 0.0346  | 0.0352 |
| EstonianBiobank. | 1   | 0.92 | 0.932   | 0.641(407)  | 0.638(17209)  | 0.00651 | 0.0767 |
| HUNT.            | 0   | 1.00 | 0.0137  | 0.619(905)  | 0.650(41914)  | -0.123  | 0.05   |
| iPSYCH.          | 0   | 0.98 | 0.223   | 0.648(1758) | 0.637(5937)   | 0.0494  | 0.0405 |
| UKBiobank.       | 0   | 1.00 | 0.692   | 0.685(1454) | 0.679(58113)  | 0.0688  | 0.174  |
| bmom.            | 0   | 1.02 | 0.161   | 0.727(225)  | 0.716(121)    | -0.267  | 0.191  |
| bmrus.           | 0   | 0.96 | 0.457   | 0.682(522)  | 0.694(460)    | -0.0752 | 0.101  |
| graza.           | 0   | 1.06 | 0.031   | 0.777(144)  | 0.674(66)     | 0.505   | 0.234  |
| greek.           | 0   | 0.98 | 0.495   | 0.792(186)  | 0.774(87)     | 0.158   | 0.231  |
| norgs.           | 0   | 1.02 | 0.505   | 0.634(101)  | 0.659(315)    | -0.116  | 0.174  |
| noroe.           | 0   | 1.02 | 0.32    | 0.666(313)  | 0.627(4367)   | 0.0889  | 0.0893 |

1 0.99 4.78e-11 0.691(41917) 0.670(371549) 0.0661 0.0101

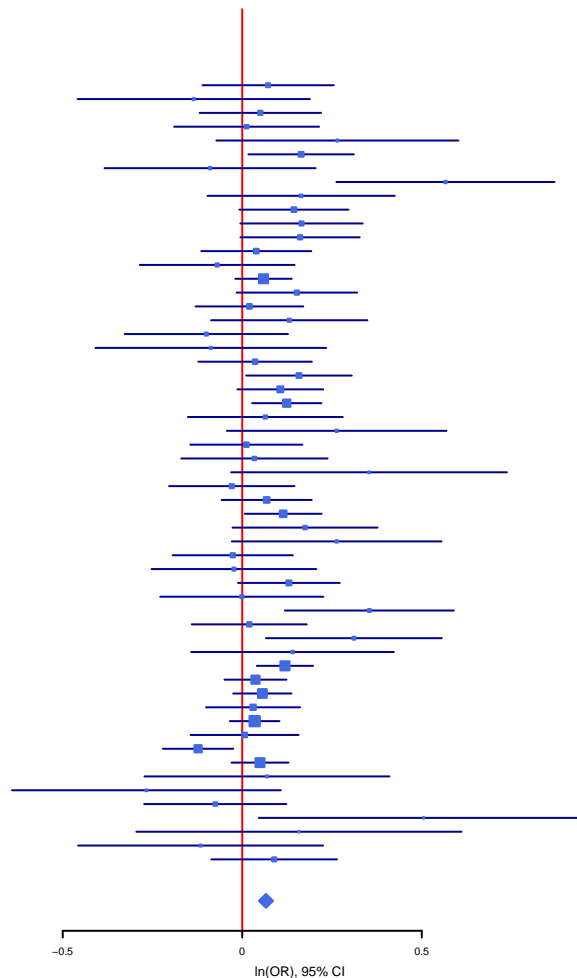

rs17183814

G/A

2:166152389

het\_P:

0.878

het\_I:

0.0

|                  | ngt       | info        | p_value         | f_ca(n)             | f_co(n)              | ln(OR)       | STDerr        |
|------------------|-----------|-------------|-----------------|---------------------|----------------------|--------------|---------------|
| bmau.            | 0         | 0.94        | 0.378           | 0.923(329)          | 0.931(1810)          | -0.146       | 0.166         |
| bmg2.            | 1         | 1.00        | 0.326           | 0.939(181)          | 0.931(478)           | 0.314        | 0.32          |
| bmg3.            | 0         | 0.96        | 0.882           | 0.929(489)          | 0.929(880)           | 0.0242       | 0.163         |
| bmpo.            | 0         | 0.91        | 0.722           | 0.937(410)          | 0.943(689)           | -0.0746      | 0.209         |
| bmsp.            | 0         | 0.90        | 0.0342          | 0.969(253)          | 0.952(291)           | 0.811        | 0.383         |
| bonn.            | 0         | 0.98        | 0.0159          | 0.939(669)          | 0.919(1246)          | 0.339        | 0.141         |
| butr.            | 1         | 1.00        | 0.842           | 0.949(236)          | 0.942(236)           | 0.432        | 0.278         |
| dub1.            | 0         | 0.97        | 0.677           | 0.939(450)          | 0.932(796)           | 0.109        | 0.261         |
| ed1.             | 0         | 0.94        | 0.909           | 0.926(275)          | 0.922(272)           | 0.0282       | 0.246         |
| fat2.            | 0         | 0.93        | 0.314           | 0.935(722)          | 0.925(1027)          | 0.144        | 0.143         |
| fran.            | 0         | 0.96        | 0.34            | 0.945(451)          | 0.934(1630)          | 0.162        | 0.17          |
| gain.            | 0         | 0.93        | 0.266           | 0.938(706)          | 0.925(593)           | 0.182        | 0.163         |
| gsk1.            | 0         | 0.99        | 0.323           | 0.933(706)          | 0.925(899)           | 0.139        | 0.141         |
| hal2.            | 0         | 0.98        | 0.528           | 0.945(410)          | 0.941(479)           | 0.136        | 0.15          |
| icuk.            | 0         | 0.95        | 0.00653         | 0.938(2456)         | 0.924(4089)          | 0.295        | 0.0753        |
| jst5.            | 1         | 1.08        | 0.112           | 0.936(646)          | 0.917(643)           | 0.235        | 0.148         |
| may1.            | 1         | 1.01        | 0.675           | 0.924(929)          | 0.922(759)           | 0.0555       | 0.133         |
| mich.            | 0         | 0.94        | 0.763           | 0.932(481)          | 0.929(399)           | 0.0592       | 0.197         |
| pf1e.            | 1         | 0.99        | 0.307           | 0.924(375)          | 0.939(346)           | -0.222       | 0.217         |
| rom3.            | 0         | 0.88        | 0.733           | 0.949(233)          | 0.941(198)           | 0.115        | 0.337         |
| slzcc.           | 0         | 0.86        | 0.209           | 0.939(628)          | 0.930(1219)          | 0.199        | 0.159         |
| stp1.            | 0         | 0.88        | 0.891           | 0.928(920)          | 0.924(991)           | 0.0192       | 0.133         |
| swa2.            | 0         | 0.96        | 0.456           | 0.940(885)          | 0.933(2252)          | 0.0932       | 0.125         |
| swei.            | 1         | 0.98        | 0.0291          | 0.943(1278)         | 0.929(3669)          | 0.216        | 0.0992        |
| top7.            | 0         | 0.97        | 0.711           | 0.943(416)          | 0.929(350)           | 0.0831       | 0.224         |
| top8.            | 1         | 1.00        | 0.888           | 0.929(148)          | 0.931(291)           | -0.0408      | 0.289         |
| uc12.            | 0         | 0.94        | 0.185           | 0.935(726)          | 0.922(693)           | -0.201       | 0.152         |
| uclo.            | 0         | 0.91        | 0.414           | 0.923(427)          | 0.936(488)           | -0.16        | 0.196         |
| ukr.             | 1         | 1.03        | 0.414           | 0.915(130)          | 0.935(130)           | -0.271       | 0.332         |
| ume4.            | 1         | 0.95        | 0.873           | 0.936(565)          | 0.938(569)           | -0.0285      | 0.178         |
| usc2.            | 1         | 0.98        | 0.128           | 0.930(1293)         | 0.921(1156)          | 0.171        | 0.112         |
| wtcc.            | 0         | 0.92        | 0.216           | 0.935(1644)         | 0.928(1641)          | 0.129        | 0.104         |
| jea2.            | 0         | 0.94        | 0.0624          | 0.947(372)          | 0.929(628)           | 0.385        | 0.207         |
| kfo4.            | 1         | 1.09        | 0.418           | 0.927(247)          | 0.914(288)           | 0.188        | 0.233         |
| tgco2.           | 0         | 1.00        | 0.275           | 0.932(1032)         | 0.921(499)           | 0.162        | 0.148         |
| bdtrs.           | 1         | 0.97        | 0.187           | 0.927(218)          | 0.926(684)           | -0.0814      | 0.219         |
| dutch.           | 1         | 1.01        | 0.138           | 0.932(831)          | 0.918(853)           | 0.191        | 0.129         |
| gawli.           | 1         | 0.98        | 0.931           | 0.929(268)          | 0.929(502)           | -0.0185      | 0.214         |
| germ1.           | 1         | 0.99        | 0.745           | 0.920(219)          | 0.920(992)           | -0.0652      | 0.2           |
| gpcw1.           | 1         | 0.97        | 0.205           | 0.941(447)          | 0.930(2092)          | 0.199        | 0.157         |
| neuc1.           | 1         | 0.98        | 0.973           | 0.933(215)          | 0.933(750)           | 0.00747      | 0.224         |
| spsp3.           | 1         | 0.99        | 0.0576          | 0.971(1153)         | 0.946(2337)          | 0.661        | 0.348         |
| swed1.           | 1         | 1.01        | 0.84            | 0.935(2908)         | 0.935(2844)          | -0.0154      | 0.0767        |
| ukwat1.          | 1         | 1.00        | 0.177           | 0.931(2789)         | 0.924(2782)          | 0.104        | 0.0769        |
| usaw4.           | 1         | 1.00        | 0.29            | 0.934(2956)         | 0.929(2930)          | 0.0776       | 0.0733        |
| usaw5.           | 1         | 0.99        | 0.788           | 0.932(1107)         | 0.930(1316)          | 0.032        | 0.119         |
| deCODE.          | 0         | 1.00        | 0.294           | 0.920(1972)         | 0.920(192602)        | 0.0651       | 0.062         |
| EstonianBiobank. | 1         | 1.00        | 0.82            | 0.944(407)          | 0.942(17209)         | 0.0354       | 0.156         |
| HUNT.            | 1         | 1.00        | 0.811           | 0.926(905)          | 0.925(41914)         | 0.0217       | 0.091         |
| IPSYCH.          | 1         | 1.01        | 0.509           | 0.920(1758)         | 0.916(5937)          | 0.0463       | 0.0701        |
| UKBiobank.       | 0         | 1.00        | 0.0579          | 0.938(1454)         | 0.925(68113)         | 0.259        | 0.221         |
| bmrom.           | 0         | 0.88        | 0.577           | 0.947(225)          | 0.937(121)           | 0.204        | 0.365         |
| bmrus.           | 1         | 0.97        | 0.127           | 0.934(522)          | 0.915(460)           | 0.269        | 0.176         |
| norgs.           | 1         | 0.99        | 0.81            | 0.955(101)          | 0.948(315)           | 0.0974       | 0.405         |
| noroe.           | 1         | 1.00        | 0.454           | 0.933(313)          | 0.922(4367)          | 0.126        | 0.169         |
|                  | <b>28</b> | <b>0.98</b> | <b>2.68e-08</b> | <b>0.933(41917)</b> | <b>0.924(371549)</b> | <b>0.103</b> | <b>0.0185</b> |

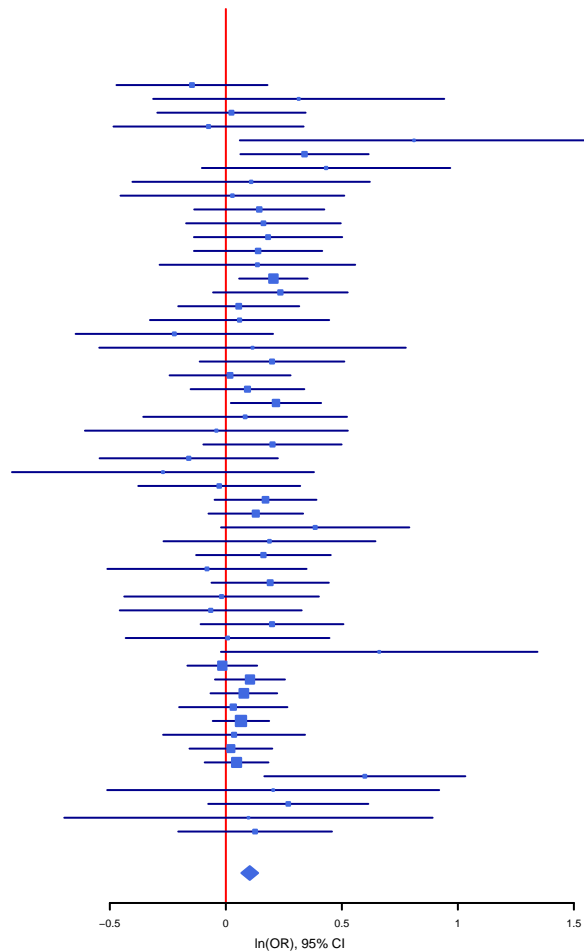

rs13417268

C/G

2:169481837

het\_P:

0.446

het\_I:

1.4

|                  | ngt | info | p_value | f_ca(n)     | f_co(n)       | ln(OR)  | STDerr |
|------------------|-----|------|---------|-------------|---------------|---------|--------|
| bmau.            | 0   | 0.99 | 0.38    | 0.784(329)  | 0.766(1810)   | 0.0912  | 0.104  |
| bm2.             | 0   | 0.98 | 0.416   | 0.776(181)  | 0.772(478)    | 0.151   | 0.185  |
| bm3.             | 0   | 1.01 | 0.917   | 0.773(489)  | 0.776(880)    | 0.0101  | 0.0977 |
| bmpp.            | 0   | 1.00 | 0.842   | 0.755(410)  | 0.757(689)    | -0.0221 | 0.111  |
| bmsp.            | 0   | 1.02 | 0.694   | 0.805(253)  | 0.800(291)    | 0.0664  | 0.169  |
| bonn.            | 0   | 0.98 | 0.577   | 0.763(669)  | 0.751(1246)   | 0.0458  | 0.082  |
| butr.            | 0   | 1.03 | 0.256   | 0.757(236)  | 0.788(236)    | -0.174  | 0.154  |
| club1.           | 0   | 0.98 | 0.861   | 0.771(150)  | 0.761(150)    | 0.0852  | 0.153  |
| edh1.            | 0   | 0.99 | 0.375   | 0.742(275)  | 0.763(272)    | -0.131  | 0.148  |
| fat2.            | 0   | 1.00 | 0.0051  | 0.785(722)  | 0.743(1027)   | 0.234   | 0.0834 |
| fran.            | 0   | 1.02 | 0.691   | 0.794(451)  | 0.781(1630)   | 0.0369  | 0.0929 |
| gain.            | 0   | 1.01 | 0.592   | 0.771(706)  | 0.762(593)    | 0.0498  | 0.0932 |
| gsk1.            | 0   | 1.00 | 0.448   | 0.740(706)  | 0.752(899)    | -0.0622 | 0.0819 |
| hal2.            | 0   | 1.02 | 0.539   | 0.776(410)  | 0.765(479)    | 0.0717  | 0.117  |
| icuk.            | 0   | 0.99 | 0.517   | 0.762(2456) | 0.756(4069)   | 0.0279  | 0.043  |
| jst5.            | 0   | 0.97 | 0.892   | 0.766(646)  | 0.766(643)    | 0.0129  | 0.095  |
| may1.            | 0   | 1.00 | 0.382   | 0.775(929)  | 0.761(759)    | 0.0735  | 0.0842 |
| mich.            | 0   | 0.94 | 0.799   | 0.774(481)  | 0.781(399)    | -0.0306 | 0.12   |
| pf1e.            | 0   | 1.05 | 0.155   | 0.785(375)  | 0.751(346)    | 0.178   | 0.125  |
| rom3.            | 0   | 0.98 | 0.0526  | 0.790(233)  | 0.727(198)    | 0.345   | 0.178  |
| sl2c.            | 0   | 1.02 | 0.113   | 0.773(628)  | 0.761(1219)   | 0.135   | 0.0855 |
| stp1.            | 0   | 0.98 | 0.365   | 0.750(920)  | 0.763(973)    | -0.0701 | 0.0775 |
| swa2.            | 0   | 1.03 | 0.861   | 0.767(895)  | 0.767(895)    | 0.0119  | 0.0681 |
| swei.            | 0   | 0.98 | 0.256   | 0.757(1278) | 0.745(3669)   | 0.0621  | 0.0547 |
| top7.            | 0   | 0.98 | 0.22    | 0.764(416)  | 0.741(350)    | 0.156   | 0.127  |
| top8.            | 0   | 1.00 | 0.0285  | 0.770(148)  | 0.698(291)    | 0.377   | 0.172  |
| ucl2.            | 0   | 0.96 | 0.701   | 0.755(726)  | 0.752(693)    | 0.0344  | 0.0897 |
| uclo.            | 0   | 1.00 | 0.033   | 0.785(427)  | 0.748(488)    | 0.243   | 0.114  |
| uktr.            | 0   | 0.90 | 0.125   | 0.796(130)  | 0.742(130)    | 0.341   | 0.223  |
| ume4.            | 0   | 1.01 | 0.812   | 0.751(565)  | 0.747(569)    | 0.0232  | 0.0975 |
| usc2.            | 0   | 0.99 | 0.793   | 0.777(1293) | 0.772(1156)   | 0.0185  | 0.0706 |
| wtc.             | 0   | 1.00 | 0.511   | 0.769(1644) | 0.759(1641)   | 0.0391  | 0.0595 |
| jea2.            | 0   | 0.99 | 0.931   | 0.767(372)  | 0.768(628)    | 0.00975 | 0.112  |
| kfo4.            | 0   | 1.01 | 0.0201  | 0.797(247)  | 0.736(288)    | 0.364   | 0.157  |
| tgco2.           | 0   | 0.95 | 0.165   | 0.783(1032) | 0.759(499)    | 0.132   | 0.0951 |
| bdtrs.           | 0   | 1.00 | 0.161   | 0.793(218)  | 0.761(684)    | 0.191   | 0.136  |
| dutch.           | 0   | 1.00 | 0.681   | 0.773(531)  | 0.766(953)    | 0.033   | 0.0805 |
| gawil.           | 0   | 1.01 | 0.249   | 0.793(268)  | 0.762(502)    | 0.152   | 0.132  |
| germ1.           | 0   | 0.96 | 0.295   | 0.766(219)  | 0.747(992)    | 0.136   | 0.13   |
| gpw1.            | 0   | 0.96 | 0.417   | 0.783(447)  | 0.769(2092)   | 0.0739  | 0.0911 |
| neuc1.           | 0   | 0.99 | 0.0331  | 0.797(215)  | 0.749(750)    | 0.291   | 0.137  |
| spsp3.           | 0   | 1.02 | 0.84    | 0.801(153)  | 0.804(2337)   | -0.0298 | 0.148  |
| swed1.           | 0   | 1.01 | 0.0303  | 0.766(2909) | 0.751(2844)   | 0.0952  | 0.0439 |
| ukwa1.           | 0   | 0.99 | 0.378   | 0.762(2789) | 0.755(2372)   | 0.0412  | 0.0468 |
| usaw4.           | 0   | 0.99 | 0.357   | 0.767(2956) | 0.760(2930)   | 0.0402  | 0.0437 |
| usaw5.           | 0   | 0.94 | 0.8     | 0.770(1107) | 0.767(1316)   | 0.0185  | 0.073  |
| deCODE.          | 0   | 1.00 | 0.124   | 0.761(1972) | 0.761(192602) | 0.0608  | 0.0395 |
| EstonianBiobank. | 1   | 0.99 | 0.785   | 0.747(407)  | 0.750(17209)  | -0.0225 | 0.0827 |
| HUNT.            | 0   | 0.99 | 0.304   | 0.761(905)  | 0.748(41914)  | 0.0573  | 0.0557 |
| iPSYCH.          | 0   | 0.94 | 0.0074  | 0.769(1758) | 0.747(5937)   | 0.125   | 0.0468 |
| UKBiobank.       | 0   | 1.00 | 0.203   | 0.766(1454) | 0.756(58113)  | 0.236   | 0.185  |
| bmom.            | 0   | 0.91 | 0.91    | 0.768(225)  | 0.822(1121)   | -0.267  | 0.219  |
| bmrus.           | 0   | 0.93 | 0.946   | 0.779(522)  | 0.779(460)    | 0.00777 | 0.115  |
| graza.           | 0   | 0.96 | 0.559   | 0.769(144)  | 0.742(66)     | 0.148   | 0.254  |
| greek.           | 0   | 0.83 | 0.0217  | 0.769(186)  | 0.850(87)     | -0.631  | 0.275  |
| norgs.           | 0   | 1.02 | 0.705   | 0.751(101)  | 0.728(315)    | 0.0736  | 0.195  |
| noroe.           | 0   | 1.02 | 0.0143  | 0.779(313)  | 0.743(4367)   | 0.251   | 0.102  |

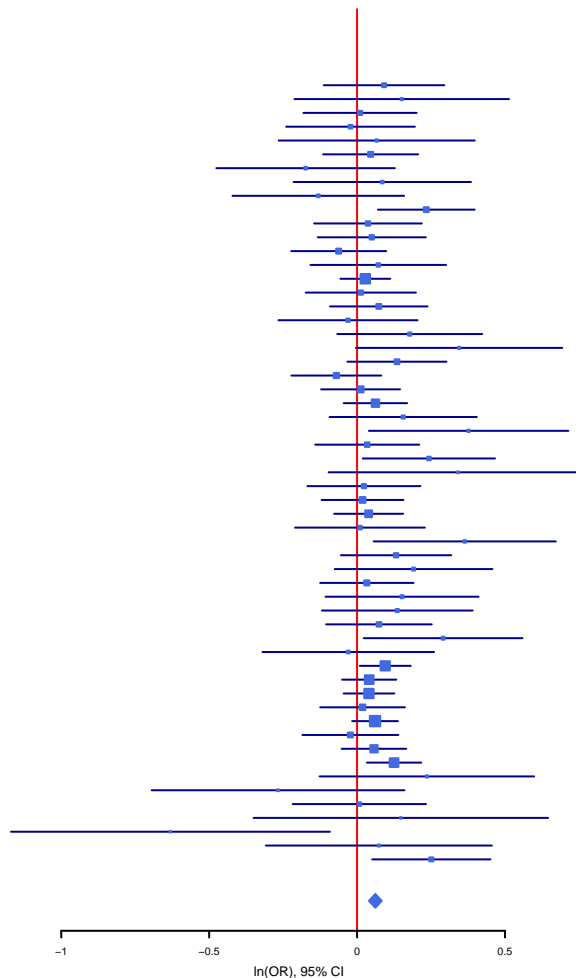

1 0.99 2.05e-08 0.768(41917) 0.758(371549) 0.0618 0.011

rs2011302

T/A

2:193738336

het\_P:

0.639

het\_I:

0.0

|                  | ngt      | info        | p_value         | f_ca(n)             | f_co(n)              | ln(OR)         | STDerr        |
|------------------|----------|-------------|-----------------|---------------------|----------------------|----------------|---------------|
| bmau.            | 0        | 0.98        | 0.127           | 0.608(329)          | 0.639(1810)          | -0.136         | 0.0888        |
| bm2.             | 0        | 1.01        | 0.824           | 0.598(181)          | 0.628(478)           | -0.0349        | 0.157         |
| bm3.             | 0        | 0.97        | 0.952           | 0.606(489)          | 0.607(880)           | -0.00501       | 0.0846        |
| bmpp.            | 0        | 1.01        | 0.508           | 0.598(410)          | 0.613(689)           | -0.064         | 0.0967        |
| bmsp.            | 0        | 0.94        | 0.125           | 0.617(253)          | 0.663(291)           | -0.224         | 0.146         |
| bonn.            | 0        | 0.98        | 0.178           | 0.603(669)          | 0.629(1246)          | -0.0965        | 0.0718        |
| butr.            | 0        | 0.95        | 0.231           | 0.572(236)          | 0.610(236)           | -0.163         | 0.136         |
| dub1.            | 1        | 1.02        | 0.206           | 0.593(150)          | 0.613(796)           | -0.163         | 0.29          |
| edf1.            | 0        | 1.05        | 0.685           | 0.637(275)          | 0.662(272)           | -0.0527        | 0.13          |
| fat2.            | 0        | 0.97        | 0.484           | 0.643(722)          | 0.629(1027)          | 0.0518         | 0.0742        |
| fran.            | 0        | 1.06        | 0.944           | 0.635(451)          | 0.638(1630)          | -0.00541       | 0.0773        |
| gain.            | 0        | 0.99        | 0.417           | 0.616(706)          | 0.635(593)           | -0.0668        | 0.0824        |
| gsk1.            | 0        | 0.97        | 0.537           | 0.603(706)          | 0.611(899)           | -0.046         | 0.0747        |
| hai2.            | 0        | 1.02        | 0.382           | 0.609(410)          | 0.624(479)           | -0.088         | 0.101         |
| icuk.            | 0        | 0.97        | 0.0481          | 0.635(2456)         | 0.651(4069)          | -0.0766        | 0.0388        |
| jsf5.            | 0        | 0.98        | 0.616           | 0.619(646)          | 0.628(643)           | -0.0416        | 0.0829        |
| may1.            | 0        | 0.99        | 0.537           | 0.619(929)          | 0.639(759)           | -0.0457        | 0.0743        |
| mich.            | 0        | 1.01        | 0.183           | 0.649(481)          | 0.614(399)           | 0.133          | 0.0998        |
| pf1e.            | 0        | 1.07        | 0.288           | 0.638(375)          | 0.665(346)           | -0.117         | 0.11          |
| rom3.            | 0        | 0.91        | 0.622           | 0.589(233)          | 0.575(198)           | 0.0756         | 0.153         |
| st2c.            | 0        | 1.01        | 0.0433          | 0.613(628)          | 0.650(1219)          | -0.153         | 0.0757        |
| stp1.            | 0        | 1.03        | 0.576           | 0.625(920)          | 0.632(973)           | -0.0376        | 0.0672        |
| swa2.            | 0        | 0.99        | 0.174           | 0.615(865)          | 0.632(2252)          | -0.0668        | 0.0669        |
| swei.            | 0        | 1.02        | 0.402           | 0.617(1278)         | 0.625(3669)          | -0.0399        | 0.0476        |
| top7.            | 0        | 0.96        | 0.314           | 0.633(416)          | 0.625(350)           | 0.116          | 0.115         |
| top8.            | 0        | 0.99        | 0.556           | 0.645(148)          | 0.674(291)           | -0.093         | 0.158         |
| ucl2.            | 0        | 1.01        | 0.076           | 0.590(726)          | 0.624(693)           | -0.137         | 0.0771        |
| uclo.            | 0        | 0.97        | 0.474           | 0.608(427)          | 0.633(488)           | -0.0714        | 0.0996        |
| uktr.            | 0        | 0.96        | 0.406           | 0.619(130)          | 0.654(130)           | -0.155         | 0.187         |
| umef4.           | 0        | 1.00        | 0.304           | 0.656(565)          | 0.676(569)           | -0.0923        | 0.0899        |
| usc2.            | 0        | 0.96        | 0.725           | 0.623(1293)         | 0.613(1156)          | 0.0217         | 0.0615        |
| wlcc.            | 0        | 1.00        | 0.236           | 0.642(1644)         | 0.654(1641)          | -0.0626        | 0.0528        |
| jea2.            | 0        | 1.02        | 0.588           | 0.614(372)          | 0.629(628)           | -0.0519        | 0.0959        |
| kfo4.            | 0        | 1.05        | 0.71            | 0.628(247)          | 0.643(288)           | -0.0498        | 0.134         |
| tgco2.           | 0        | 1.01        | 0.102           | 0.597(1032)         | 0.631(499)           | -0.131         | 0.0802        |
| bdrs.            | 0        | 1.02        | 0.106           | 0.603(218)          | 0.656(684)           | -0.185         | 0.115         |
| dutch.           | 0        | 0.99        | 0.304           | 0.609(831)          | 0.627(953)           | -0.072         | 0.0701        |
| gawil.           | 0        | 0.99        | 0.149           | 0.665(268)          | 0.627(502)           | 0.156          | 0.115         |
| germ1.           | 0        | 1.00        | 0.727           | 0.622(219)          | 0.622(992)           | 0.0389         | 0.111         |
| gpcw1.           | 0        | 0.96        | 0.332           | 0.611(447)          | 0.626(2092)          | -0.0756        | 0.0779        |
| neuc1.           | 0        | 0.95        | 0.36            | 0.660(215)          | 0.635(750)           | 0.11           | 0.12          |
| spsp3.           | 0        | 1.01        | 0.782           | 0.621(153)          | 0.622(2337)          | -0.0337        | 0.122         |
| swed1.           | 0        | 0.97        | 0.0698          | 0.618(2909)         | 0.633(2844)          | -0.072         | 0.0397        |
| ukwa1.           | 0        | 0.97        | 0.798           | 0.642(2789)         | 0.644(2372)          | -0.0109        | 0.0422        |
| usaw4.           | 0        | 0.97        | 0.172           | 0.619(256)          | 0.629(2930)          | -0.0531        | 0.0389        |
| usaw5.           | 0        | 0.98        | 0.105           | 0.606(1107)         | 0.615(1316)          | -0.101         | 0.0623        |
| deCODE.          | 0        | 1.00        | 0.000988        | 0.612(1972)         | 0.612(192602)        | -0.112         | 0.0341        |
| EstonianBiobank. | 1        | 1.00        | 0.29            | 0.631(407)          | 0.615(17209)         | 0.0785         | 0.0742        |
| HUNT.            | 0        | 0.99        | 0.0235          | 0.657(905)          | 0.632(41914)         | 0.114          | 0.0501        |
| iPSYCH.          | 0        | 0.99        | 0.0123          | 0.613(1758)         | 0.636(5937)          | -0.0994        | 0.0397        |
| UKBiobank.       | 0        | 1.00        | 0.108           | 0.626(1454)         | 0.642(58113)         | -0.27          | 0.168         |
| bmron.           | 0        | 1.07        | 0.939           | 0.571(225)          | 0.566(121)           | 0.0022         | 0.59          |
| bmrus.           | 0        | 0.95        | 0.969           | 0.590(522)          | 0.588(460)           | 0.00379        | 0.0958        |
| graza.           | 0        | 0.92        | 0.584           | 0.614(144)          | 0.583(66)            | 0.125          | 0.228         |
| greek.           | 0        | 1.06        | 0.255           | 0.532(186)          | 0.580(87)            | -0.211         | 0.185         |
| norgs.           | 0        | 0.94        | 0.566           | 0.613(101)          | 0.636(315)           | -0.103         | 0.18          |
| noroe.           | 0        | 1.01        | 0.522           | 0.610(313)          | 0.635(4367)          | -0.0564        | 0.0879        |
|                  | <b>1</b> | <b>0.99</b> | <b>4.25e-08</b> | <b>0.621(41917)</b> | <b>0.623(371549)</b> | <b>-0.0529</b> | <b>0.0097</b> |

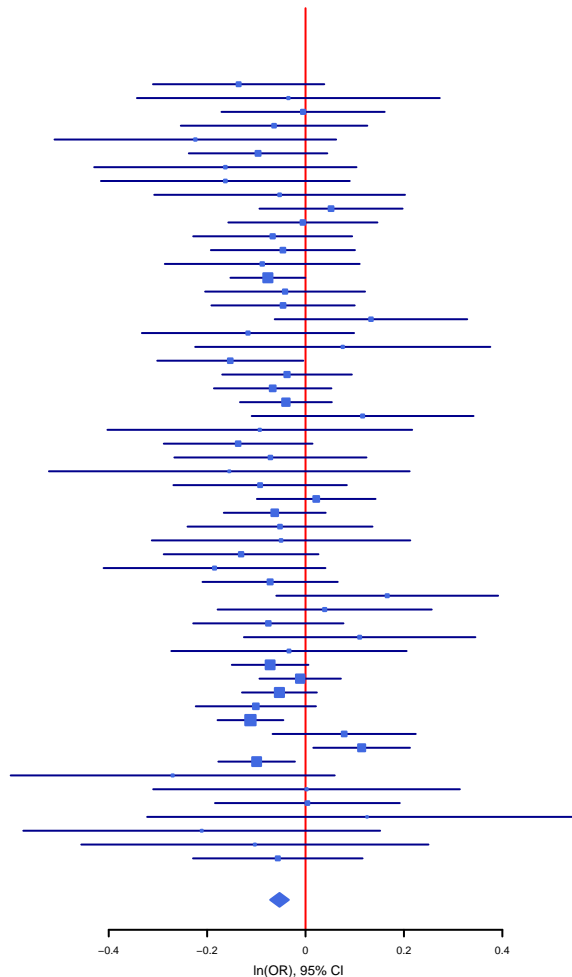

rs2719164

A/G

2:194437889

het\_P:

0.281

het\_I:

9.2

|                  | ngt         | info            | p_value             | f_ca(n)              | f_co(n)       | ln(OR)        | STDerr |
|------------------|-------------|-----------------|---------------------|----------------------|---------------|---------------|--------|
| bmau.            | 0           | 0.99            | 0.225               | 0.603(329)           | 0.577(1810)   | 0.106         | 0.0872 |
| bm2g.            | 1           | 1.07            | 0.322               | 0.624(181)           | 0.586(478)    | 0.155         | 0.157  |
| bm3.             | 0           | 1.00            | 0.0865              | 0.615(489)           | 0.582(880)    | 0.143         | 0.0837 |
| bmpo.            | 0           | 1.01            | 0.731               | 0.642(410)           | 0.619(689)    | 0.034         | 0.0991 |
| bmsp.            | 0           | 0.96            | 0.976               | 0.578(253)           | 0.585(291)    | -0.00431      | 0.14   |
| bonn.            | 0           | 1.01            | 0.0122              | 0.633(669)           | 0.591(1246)   | 0.178         | 0.0712 |
| butr.            | 1           | 1.01            | 0.294               | 0.602(236)           | 0.568(236)    | 0.138         | 0.132  |
| dub1.            | 1           | 0.06            | 0.065               | 0.613(150)           | 0.556(756)    | 0.033         | 0.127  |
| edf1.            | 0           | 1.01            | 0.299               | 0.595(275)           | 0.564(272)    | 0.132         | 0.127  |
| fat2.            | 0           | 0.98            | 0.337               | 0.579(722)           | 0.591(1027)   | -0.0697       | 0.0725 |
| fran.            | 0           | 1.01            | 0.191               | 0.603(451)           | 0.576(1630)   | 0.101         | 0.0773 |
| gain.            | 0           | 0.99            | 0.853               | 0.591(706)           | 0.591(593)    | -0.015        | 0.0813 |
| gsk1.            | 0           | 1.00            | 0.199               | 0.605(706)           | 0.584(899)    | 0.0939        | 0.0731 |
| hai2.            | 1           | 0.97            | 0.469               | 0.602(410)           | 0.588(479)    | 0.0744        | 0.103  |
| icuk.            | 0           | 0.96            | 0.00219             | 0.609(2456)          | 0.581(4069)   | 0.117         | 0.0362 |
| jsi5.            | 0           | 0.97            | 0.335               | 0.591(646)           | 0.576(643)    | 0.0789        | 0.0819 |
| may1.            | 1           | 1.00            | 0.0614              | 0.591(929)           | 0.560(759)    | 0.135         | 0.0721 |
| mich.            | 0           | 0.95            | 0.842               | 0.608(481)           | 0.603(399)    | 0.0201        | 0.101  |
| pf1e.            | 1           | 1.00            | 0.862               | 0.591(375)           | 0.594(346)    | -0.0192       | 0.11   |
| rom3.            | 1           | 0.94            | 0.488               | 0.551(233)           | 0.530(198)    | 0.104         | 0.15   |
| si2c.            | 0           | 1.02            | 0.0146              | 0.628(628)           | 0.573(1219)   | 0.181         | 0.0743 |
| stp1.            | 0           | 0.99            | 0.531               | 0.602(920)           | 0.593(973)    | 0.0423        | 0.0675 |
| swa2.            | 0           | 1.02            | 0.0206              | 0.596(865)           | 0.563(2252)   | 0.137         | 0.0592 |
| swei.            | 1           | 1.00            | 0.701               | 0.587(1278)          | 0.587(3669)   | -0.0183       | 0.0475 |
| top7.            | 0           | 0.96            | 0.864               | 0.559(416)           | 0.555(350)    | -0.0192       | 0.112  |
| top8.            | 1           | 0.92            | 0.306               | 0.578(148)           | 0.543(291)    | 0.158         | 0.154  |
| ucl2.            | 1           | 1.02            | 0.818               | 0.593(726)           | 0.599(693)    | -0.0176       | 0.0764 |
| ucio.            | 0           | 1.03            | 0.264               | 0.593(427)           | 0.572(488)    | 0.107         | 0.0953 |
| uktr.            | 1           | 1.01            | 0.00259             | 0.681(130)           | 0.550(130)    | 0.562         | 0.187  |
| umr4.            | 1           | 1.05            | 0.907               | 0.536(565)           | 0.533(569)    | 0.00955       | 0.0828 |
| usc2.            | 1           | 0.98            | 0.258               | 0.602(1293)          | 0.596(1156)   | 0.069         | 0.061  |
| wlcc.            | 0           | 0.99            | 0.195               | 0.592(1644)          | 0.580(1641)   | 0.0669        | 0.0516 |
| jea2.            | 0           | 0.97            | 0.718               | 0.611(372)           | 0.598(628)    | 0.0354        | 0.098  |
| kfo4.            | 1           | 0.99            | 0.444               | 0.621(247)           | 0.608(288)    | 0.103         | 0.134  |
| tgco2.           | 0           | 0.99            | 0.213               | 0.603(1032)          | 0.574(499)    | 0.0996        | 0.08   |
| bdrs.            | 1           | 0.99            | 0.972               | 0.592(218)           | 0.597(684)    | -0.00411      | 0.114  |
| dutch.           | 1           | 0.99            | 0.879               | 0.600(831)           | 0.600(953)    | -0.0106       | 0.0696 |
| gawf.            | 1           | 1.00            | 0.733               | 0.606(268)           | 0.606(262)    | 0.0384        | 0.112  |
| germ1.           | 1           | 0.99            | 0.689               | 0.614(219)           | 0.598(992)    | 0.045         | 0.112  |
| gpcw1.           | 1           | 1.01            | 0.884               | 0.603(447)           | 0.599(2092)   | 0.0109        | 0.0755 |
| neuc1.           | 1           | 1.05            | 0.421               | 0.565(215)           | 0.587(750)    | -0.0887       | 0.11   |
| spsp3.           | 1           | 0.99            | 0.0177              | 0.647(153)           | 0.582(2337)   | 0.298         | 0.126  |
| swed1.           | 1           | 1.01            | 0.63                | 0.589(2909)          | 0.585(2844)   | 0.0184        | 0.0382 |
| ukwa1.           | 1           | 1.01            | 0.261               | 0.586(2789)          | 0.597(2372)   | -0.0453       | 0.0403 |
| usa4.            | 1           | 1.02            | 0.345               | 0.591(2956)          | 0.583(2930)   | 0.0354        | 0.074  |
| usa5.            | 1           | 0.96            | 0.346               | 0.576(1107)          | 0.590(1316)   | -0.0589       | 0.0625 |
| deCODE.          | 0           | 1.00            | 0.0355              | 0.551(1972)          | 0.551(192602) | 0.0704        | 0.0335 |
| EstonianBiobank. | 1           | 0.99            | 0.344               | 0.602(407)           | 0.588(17209)  | 0.069         | 0.0729 |
| HUNT.            | 1           | 1.00            | 0.609               | 0.569(905)           | 0.562(41914)  | 0.0248        | 0.0485 |
| iPSYCH.          | 1           | 0.99            | 0.253               | 0.597(1758)          | 0.587(5937)   | 0.0451        | 0.0394 |
| UKBiobank.       | 0           | 1.00            | 0.114               | 0.597(1454)          | 0.582(58113)  | 0.28          | 0.177  |
| bmron.           | 0           | 0.97            | 0.345               | 0.624(251)           | 0.574(121)    | 0.2148        | 0.17   |
| bmrus.           | 0           | 0.96            | 0.386               | 0.625(522)           | 0.643(460)    | -0.0847       | 0.0976 |
| graza.           | 1           | 0.86            | 0.929               | 0.597(144)           | 0.599(66)     | 0.0209        | 0.235  |
| greek.           | 0           | 0.93            | 0.0461              | 0.601(186)           | 0.510(87)     | 0.392         | 0.197  |
| norgs.           | 0           | 1.02            | 0.885               | 0.554(101)           | 0.576(315)    | 0.0249        | 0.172  |
| noroe.           | 1           | 0.99            | 0.71                | 0.566(313)           | 0.567(4367)   | -0.0319       | 0.0859 |
| <b>30</b>        | <b>1.00</b> | <b>4.85e-08</b> | <b>0.594(41917)</b> | <b>0.564(371549)</b> | <b>0.0517</b> | <b>0.0095</b> |        |

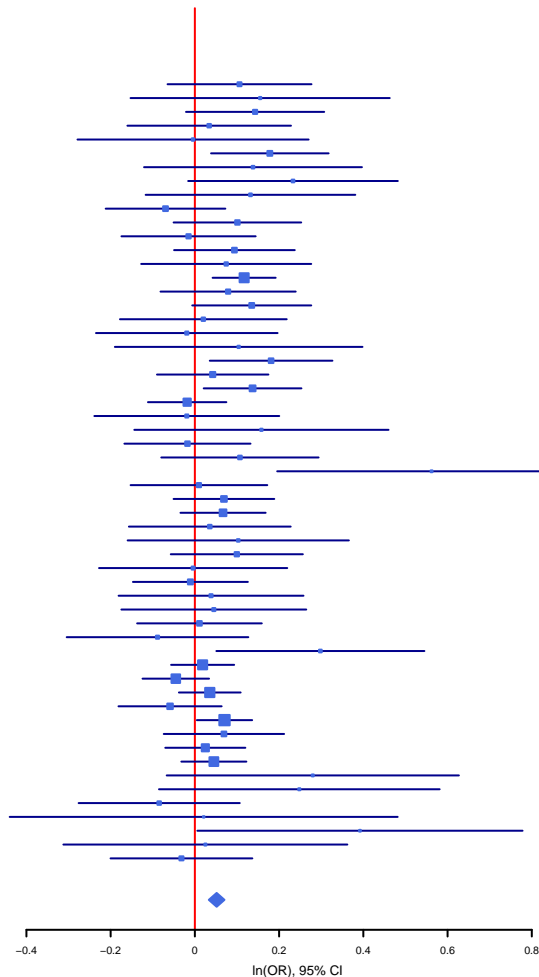

rs9834970

T/C

3:36856030

het\_P:

0.00115

het\_I:

40.3

|                  | ngt         | info            | p_value             | f_ca(n)              | f_co(n)       | ln(OR)        | STDerr |
|------------------|-------------|-----------------|---------------------|----------------------|---------------|---------------|--------|
| bmau.            | 0           | 0.99            | 0.00362             | 0.456(329)           | 0.520(1810)   | -0.251        | 0.0862 |
| bm2g.            | 1           | 0.97            | 0.489               | 0.486(181)           | 0.514(478)    | -0.11         | 0.159  |
| bm3.             | 0           | 0.97            | 0.57                | 0.493(489)           | 0.478(880)    | 0.0471        | 0.0829 |
| bmpo.            | 0           | 0.96            | 0.0153              | 0.496(410)           | 0.542(689)    | -0.239        | 0.0985 |
| bmsp.            | 0           | 0.98            | 0.0401              | 0.396(253)           | 0.472(291)    | -0.287        | 0.14   |
| bonn.            | 0           | 0.99            | 0.000583            | 0.450(669)           | 0.513(1246)   | -0.243        | 0.0706 |
| butr.            | 1           | 1.01            | 0.0528              | 0.494(236)           | 0.557(236)    | -0.253        | 0.131  |
| dub1.            | 0           | 0.97            | 0.369               | 0.513(150)           | 0.543(796)    | -0.116        | 0.23   |
| edf1.            | 0           | 1.01            | 0.945               | 0.485(275)           | 0.491(272)    | 0.00876       | 0.126  |
| fat2.            | 0           | 0.97            | 0.209               | 0.484(722)           | 0.509(1027)   | -0.0893       | 0.071  |
| fran.            | 0           | 0.98            | 0.589               | 0.470(451)           | 0.485(1630)   | -0.0418       | 0.0773 |
| gain.            | 1           | 1.02            | 0.0464              | 0.482(706)           | 0.521(593)    | -0.157        | 0.0788 |
| gsk1.            | 0           | 1.01            | 0.241               | 0.505(706)           | 0.486(899)    | 0.0833        | 0.071  |
| hai2.            | 1           | 0.96            | 0.234               | 0.461(410)           | 0.504(479)    | -0.121        | 0.101  |
| icuk.            | 0           | 1.02            | 0.000472            | 0.479(2456)          | 0.512(4069)   | -0.127        | 0.0363 |
| js15.            | 1           | 0.95            | 0.91                | 0.503(646)           | 0.504(643)    | 0.00926       | 0.0818 |
| may1.            | 1           | 0.99            | 0.0335              | 0.478(929)           | 0.520(759)    | -0.153        | 0.0719 |
| mich.            | 0           | 1.02            | 0.93                | 0.485(481)           | 0.490(399)    | -0.00844      | 0.096  |
| pf1e.            | 1           | 0.98            | 0.945               | 0.508(375)           | 0.497(346)    | -0.00753      | 0.11   |
| rom3.            | 1           | 1.02            | 0.136               | 0.500(233)           | 0.540(198)    | -0.211        | 0.141  |
| si2c.            | 0           | 0.96            | 0.88                | 0.502(628)           | 0.493(1219)   | 0.0112        | 0.0743 |
| stp1.            | 0           | 0.95            | 0.823               | 0.492(920)           | 0.491(973)    | 0.0152        | 0.0678 |
| swa2.            | 0           | 0.97            | 0.037               | 0.493(865)           | 0.508(2252)   | -0.102        | 0.0597 |
| swei.            | 1           | 1.03            | 0.00015             | 0.479(1278)          | 0.518(3669)   | -0.176        | 0.0464 |
| top7.            | 1           | 1.04            | 0.173               | 0.522(416)           | 0.570(350)    | -0.147        | 0.108  |
| top8.            | 1           | 0.98            | 0.195               | 0.574(148)           | 0.519(291)    | 0.195         | 0.151  |
| ucl2.            | 1           | 0.97            | 0.00128             | 0.459(726)           | 0.519(693)    | -0.249        | 0.0773 |
| ucio.            | 0           | 0.96            | 0.553               | 0.477(427)           | 0.493(488)    | -0.0579       | 0.0977 |
| uktr.            | 1           | 1.04            | 0.026               | 0.415(130)           | 0.515(130)    | -0.391        | 0.176  |
| umr4.            | 1           | 0.96            | 0.0655              | 0.481(565)           | 0.446(569)    | 0.16          | 0.0868 |
| usc2.            | 1           | 1.02            | 0.459               | 0.499(1293)          | 0.512(1156)   | -0.0432       | 0.0583 |
| wlcc.            | 0           | 0.99            | 9.51e-06            | 0.466(1644)          | 0.517(1641)   | -0.226        | 0.0511 |
| jea2.            | 0           | 1.00            | 0.636               | 0.522(372)           | 0.515(628)    | 0.0447        | 0.0944 |
| kfo4.            | 0           | 0.98            | 0.774               | 0.466(247)           | 0.448(288)    | 0.038         | 0.132  |
| tgco2.           | 1           | 1.00            | 0.16                | 0.476(1032)          | 0.502(499)    | -0.11         | 0.0783 |
| bdrs.            | 1           | 1.00            | 0.877               | 0.477(218)           | 0.481(684)    | 0.0173        | 0.112  |
| dutch.           | 1           | 1.04            | 0.751               | 0.472(831)           | 0.481(953)    | -0.021        | 0.0665 |
| gaw1.            | 1           | 0.97            | 0.198               | 0.453(268)           | 0.481(502)    | -0.143        | 0.111  |
| germ1.           | 0           | 0.95            | 0.856               | 0.492(219)           | 0.501(992)    | -0.02         | 0.111  |
| gpcw1.           | 0           | 0.97            | 0.603               | 0.497(447)           | 0.506(2092)   | -0.0392       | 0.0753 |
| neuc1.           | 0           | 0.97            | 0.0926              | 0.479(215)           | 0.522(750)    | -0.19         | 0.113  |
| spsp3.           | 0           | 0.95            | 0.309               | 0.469(153)           | 0.445(2337)   | 0.125         | 0.123  |
| swed1.           | 1           | 1.00            | 0.063               | 0.496(2909)          | 0.512(2844)   | -0.0704       | 0.0379 |
| ukwa1.           | 1           | 1.01            | 2.71e-05            | 0.470(2789)          | 0.509(2372)   | -0.168        | 0.0399 |
| usa4.            | 0           | 0.98            | 0.002               | 0.482(2958)          | 0.491(2930)   | -0.0386       | 0.0374 |
| usaw5.           | 0           | 0.94            | 0.811               | 0.504(1107)          | 0.508(1316)   | -0.0148       | 0.0617 |
| deCODE.          | 0           | 1.00            | 0.184               | 0.525(1972)          | 0.525(192602) | -0.044        | 0.0331 |
| EstonianBiobank. | 1           | 1.00            | 0.755               | 0.525(407)           | 0.526(17209)  | 0.0222        | 0.0712 |
| HUNT.            | 0           | 0.99            | 0.521               | 0.524(905)           | 0.532(41914)  | -0.0309       | 0.0481 |
| iPSYCH.          | 0           | 0.98            | 0.126               | 0.490(1758)          | 0.505(5937)   | -0.0593       | 0.0388 |
| UKBiobank.       | 0           | 1.00            | 0.112               | 0.489(1454)          | 0.501(58113)  | -0.275        | 0.173  |
| bmrom.           | 1           | 0.98            | 0.146               | 0.487(2125)          | 0.487(2121)   | -0.2141       | 0.06   |
| bmrus.           | 1           | 1.01            | 0.275               | 0.490(522)           | 0.515(460)    | -0.0996       | 0.0913 |
| graza.           | 1           | 1.03            | 0.59                | 0.476(144)           | 0.507(66)     | -0.114        | 0.211  |
| greek.           | 1           | 1.03            | 0.0202              | 0.438(186)           | 0.546(87)     | -0.432        | 0.186  |
| norgs.           | 1           | 1.06            | 0.754               | 0.554(101)           | 0.535(315)    | -0.0535       | 0.171  |
| noroe.           | 1           | 0.98            | 0.114               | 0.503(313)           | 0.531(4367)   | -0.136        | 0.0861 |
| <b>28</b>        | <b>0.99</b> | <b>6.63e-19</b> | <b>0.487(41917)</b> | <b>0.519(371549)</b> | <b>-0.083</b> | <b>0.0093</b> |        |

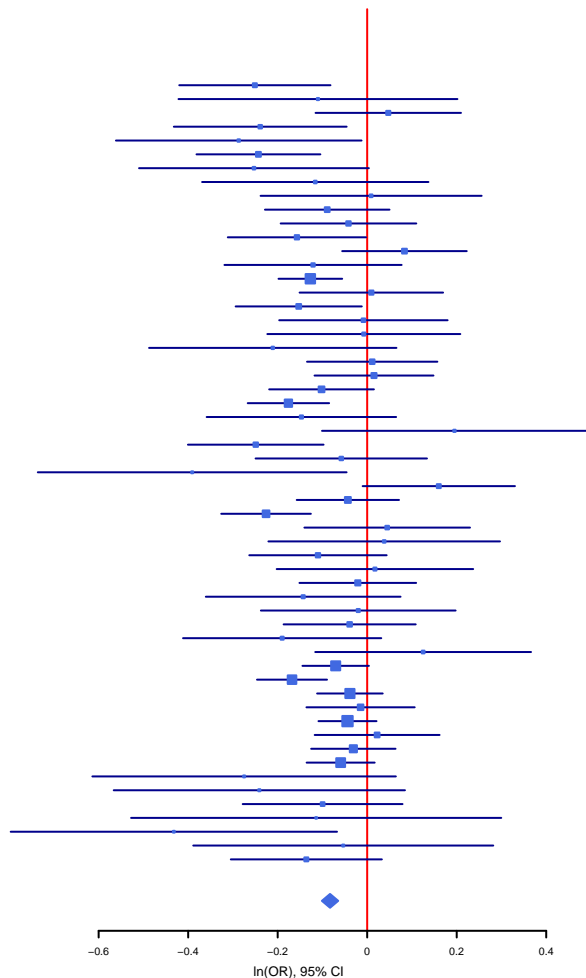



rs2336147

T/C

3:52626443

het\_P:

0.0994

het\_I:

20.0

|                  | ngt  | info  | p_value     | f_ca(n)     | f_co(n)       | ln(OR)   | STDerr |
|------------------|------|-------|-------------|-------------|---------------|----------|--------|
| bmau.            | 0    | 1.01  | 0.396       | 0.535(329)  | 0.516(1810)   | 0.0722   | 0.0851 |
| bm2g.            | 0    | 0.96  | 0.338       | 0.417(1811) | 0.494(478)    | -0.153   | 0.16   |
| bm3g.            | 0    | 1.00  | 0.161       | 0.512(489)  | 0.484(880)    | 0.115    | 0.0824 |
| bmpo.            | 0    | 0.98  | 0.0702      | 0.493(410)  | 0.441(689)    | 0.175    | 0.0966 |
| bmsp.            | 0    | 0.92  | 0.172       | 0.505(253)  | 0.453(291)    | 0.198    | 0.145  |
| bonn.            | 0    | 1.00  | 0.00624     | 0.512(669)  | 0.464(1246)   | 0.19     | 0.0695 |
| butr.            | 0    | 0.89  | 0.799       | 0.447(236)  | 0.439(236)    | 0.0354   | 0.139  |
| dub1.            | 1.02 | 0.079 | 0.534(1750) | 0.538(796)  | 0.538(796)    | 0.0899   | 0.17   |
| edf1.            | 0    | 0.87  | 0.534       | 0.509(275)  | 0.540(272)    | -0.0851  | 0.137  |
| fat2.            | 0    | 1.03  | 0.153       | 0.495(722)  | 0.477(1027)   | 0.099    | 0.0693 |
| fran.            | 0    | 0.96  | 0.276       | 0.482(451)  | 0.504(1630)   | -0.085   | 0.0781 |
| gain.            | 0    | 1.00  | 0.0206      | 0.522(706)  | 0.479(593)    | 0.185    | 0.0799 |
| gsk1.            | 0    | 0.98  | 0.00315     | 0.530(706)  | 0.476(899)    | 0.214    | 0.0725 |
| hai2.            | 0    | 0.98  | 0.408       | 0.498(410)  | 0.471(479)    | 0.0828   | 0.1    |
| icuk.            | 0    | 1.01  | 0.00381     | 0.529(2456) | 0.502(4069)   | 0.105    | 0.0364 |
| jsi5.            | 0    | 1.00  | 0.114       | 0.503(646)  | 0.534(643)    | -0.126   | 0.0799 |
| may1.            | 0    | 1.00  | 0.144       | 0.497(929)  | 0.474(759)    | 0.105    | 0.0718 |
| mich.            | 0    | 1.02  | 0.3         | 0.514(481)  | 0.482(399)    | 0.0997   | 0.0961 |
| pf1e.            | 0    | 1.02  | 0.656       | 0.496(375)  | 0.509(346)    | -0.0478  | 0.107  |
| rom3.            | 0    | 1.08  | 0.361       | 0.468(233)  | 0.447(198)    | 0.126    | 0.138  |
| si2c.            | 0    | 0.94  | 0.0115      | 0.513(628)  | 0.470(1219)   | 0.189    | 0.075  |
| stp1.            | 0    | 0.98  | 0.925       | 0.506(920)  | 0.505(973)    | -0.00632 | 0.0667 |
| swa2.            | 0    | 1.01  | 0.094       | 0.496(895)  | 0.492(2252)   | -0.0004  | 0.0584 |
| swei.            | 0    | 1.01  | 0.091       | 0.499(1278) | 0.475(3669)   | 0.0784   | 0.0464 |
| top7.            | 0    | 1.00  | 0.597       | 0.481(416)  | 0.512(350)    | -0.0576  | 0.109  |
| top8.            | 0    | 1.01  | 0.26        | 0.490(148)  | 0.527(291)    | -0.166   | 0.148  |
| ucl2.            | 0    | 0.99  | 0.862       | 0.476(726)  | 0.475(693)    | 0.0132   | 0.0764 |
| ucio.            | 0    | 1.02  | 0.253       | 0.522(427)  | 0.502(488)    | 0.108    | 0.0948 |
| uktr.            | 0    | 1.01  | 0.336       | 0.573(130)  | 0.531(130)    | 0.169    | 0.176  |
| umr4.            | 0    | 0.97  | 0.809       | 0.469(565)  | 0.464(569)    | 0.0207   | 0.0859 |
| usc2.            | 0    | 0.97  | 0.294       | 0.508(1293) | 0.491(1156)   | 0.0624   | 0.0595 |
| wlcc.            | 0    | 0.93  | 0.0342      | 0.523(1644) | 0.491(1641)   | 0.111    | 0.0524 |
| jea2.            | 0    | 1.00  | 0.371       | 0.483(372)  | 0.468(628)    | 0.0844   | 0.0944 |
| kfo4.            | 0    | 1.05  | 0.203       | 0.498(247)  | 0.448(288)    | 0.164    | 0.129  |
| tgco2.           | 0    | 1.04  | 0.777       | 0.491(1032) | 0.489(499)    | 0.0218   | 0.0767 |
| bdrs.            | 0    | 0.97  | 0.657       | 0.484(218)  | 0.474(684)    | 0.0505   | 0.114  |
| dutch.           | 0    | 1.04  | 0.176       | 0.494(831)  | 0.470(953)    | 0.09     | 0.0666 |
| gaw1.            | 0    | 0.94  | 0.0042      | 0.541(268)  | 0.541(268)    | 0.114    | 0.114  |
| germ1.           | 0    | 0.95  | 0.9         | 0.452(219)  | 0.462(992)    | -0.014   | 0.112  |
| gpcw1.           | 0    | 1.02  | 0.488       | 0.511(447)  | 0.493(2092)   | 0.051    | 0.0735 |
| neuc1.           | 0    | 1.02  | 0.314       | 0.481(215)  | 0.506(750)    | -0.111   | 0.11   |
| spsp3.           | 0    | 0.99  | 0.584       | 0.487(153)  | 0.463(2337)   | 0.0658   | 0.12   |
| swed1.           | 0    | 1.02  | 0.174       | 0.486(2909) | 0.474(284)    | 0.0508   | 0.0374 |
| ukwa1.           | 0    | 1.00  | 0.0943      | 0.522(2789) | 0.503(2372)   | 0.0668   | 0.0399 |
| usa4.            | 0    | 1.02  | 0.244       | 0.508(2956) | 0.497(2930)   | 0.0428   | 0.0367 |
| usa5.            | 0    | 1.00  | 0.287       | 0.516(1107) | 0.497(1316)   | 0.064    | 0.0601 |
| deCODE.          | 0    | 1.00  | 0.109       | 0.508(1972) | 0.508(192602) | 0.0534   | 0.0333 |
| EstonianBiobank. | 1    | 1.00  | 0.595       | 0.468(407)  | 0.467(17209)  | 0.0385   | 0.0725 |
| HUNT.            | 0    | 1.00  | 0.56        | 0.489(905)  | 0.480(41914)  | 0.028    | 0.048  |
| iPSYCH.          | 0    | 1.02  | 0.0409      | 0.495(1758) | 0.475(5937)   | 0.0782   | 0.0382 |
| UKBiobank.       | 0    | 1.00  | 0.000116    | 0.539(1454) | 0.502(58113)  | 0.693    | 0.18   |
| bmron.           | 0    | 1.00  | 0.18        | 0.489(251)  | 0.479(121)    | 0.0377   | 0.164  |
| bmrus.           | 0    | 0.94  | 0.301       | 0.478(522)  | 0.460(460)    | 0.0983   | 0.095  |
| graza.           | 0    | 0.98  | 0.235       | 0.458(144)  | 0.523(66)     | -0.257   | 0.217  |
| greek.           | 0    | 1.01  | 0.565       | 0.430(186)  | 0.397(87)     | 0.109    | 0.188  |
| norgs.           | 0    | 1.09  | 0.3         | 0.525(101)  | 0.465(315)    | 0.168    | 0.162  |
| noroe.           | 0    | 1.00  | 0.736       | 0.474(313)  | 0.470(4367)   | 0.0288   | 0.0854 |

1 1.00 3.61e-13 0.504(41917) 0.498(371549) 0.0677 0.0093

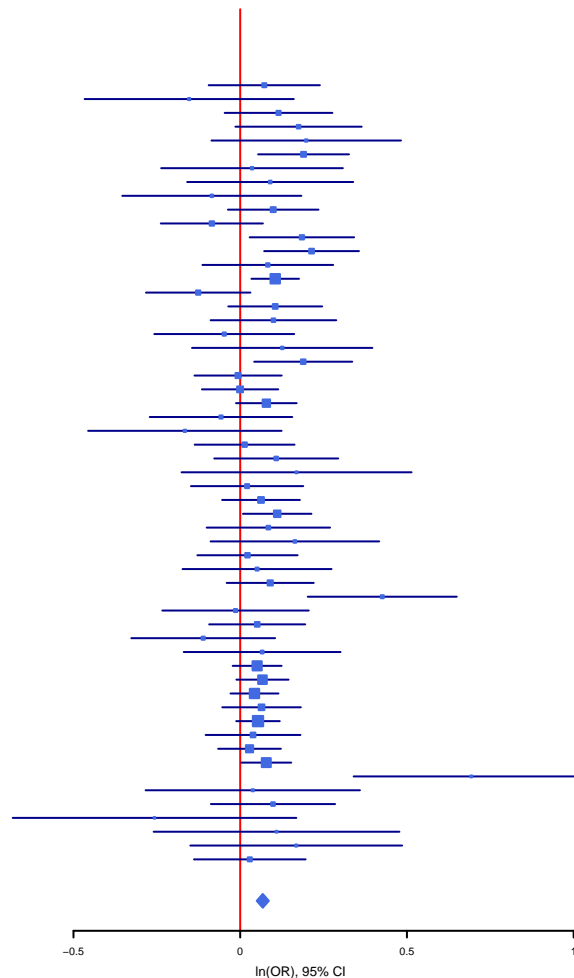

rs115694474

T/A

3:70488788

het\_P:

0.544

het\_I:

0.0

|                  | ngt      | info        | p_value         | f_ca(n)             | f_co(n)              | ln(OR)        | STDerr        |
|------------------|----------|-------------|-----------------|---------------------|----------------------|---------------|---------------|
| bmau.            | 0        | 0.99        | 0.255           | 0.789(329)          | 0.809(1810)          | -0.12         | 0.105         |
| bm2g.            | 0        | 0.98        | 0.64            | 0.822(181)          | 0.816(478)           | 0.0974        | 0.208         |
| bm3g.            | 0        | 1.00        | 0.0995          | 0.815(489)          | 0.791(880)           | 0.17          | 0.103         |
| bmpp.            | 0        | 1.01        | 0.144           | 0.815(410)          | 0.803(689)           | 0.179         | 0.122         |
| bmsp.            | 0        | 0.95        | 0.668           | 0.822(253)          | 0.834(291)           | 0.0802        | 0.187         |
| bonn.            | 0        | 0.97        | 0.951           | 0.807(669)          | 0.806(1246)          | 0.00539       | 0.089         |
| butr.            | 0        | 1.04        | 0.0323          | 0.847(326)          | 0.792(236)           | 0.362         | 0.169         |
| dub1.            | 0        | 1.01        | 0.599           | 0.814(750)          | 0.794(796)           | 0.118         | 0.16          |
| edf1.            | 0        | 1.02        | 0.599           | 0.832(275)          | 0.821(272)           | 0.0868        | 0.165         |
| fat2.            | 0        | 1.00        | 0.625           | 0.800(722)          | 0.806(1027)          | -0.0429       | 0.0879        |
| fran.            | 0        | 1.02        | 0.0125          | 0.840(451)          | 0.800(1630)          | 0.254         | 0.102         |
| gain.            | 0        | 0.99        | 0.942           | 0.809(706)          | 0.810(593)           | -0.00733      | 0.101         |
| gsk1.            | 0        | 1.00        | 0.0492          | 0.811(706)          | 0.783(899)           | 0.176         | 0.0894        |
| hal2.            | 0        | 0.95        | 0.618           | 0.813(410)          | 0.829(479)           | -0.0658       | 0.132         |
| icuk.            | 0        | 1.00        | 0.453           | 0.812(2456)         | 0.807(4069)          | 0.0351        | 0.0467        |
| js15.            | 0        | 0.95        | 0.899           | 0.808(646)          | 0.807(643)           | -0.0131       | 0.103         |
| may1.            | 0        | 0.96        | 0.142           | 0.810(929)          | 0.795(759)           | 0.135         | 0.0916        |
| mich.            | 0        | 0.99        | 0.394           | 0.823(481)          | 0.809(399)           | 0.107         | 0.125         |
| pf1e.            | 0        | 1.00        | 0.115           | 0.793(375)          | 0.822(346)           | -0.217        | 0.137         |
| rom3.            | 0        | 1.01        | 0.195           | 0.828(233)          | 0.793(198)           | 0.236         | 0.182         |
| sl2c.            | 0        | 1.00        | 0.285           | 0.822(628)          | 0.792(1219)          | 0.1           | 0.0935        |
| stp1.            | 0        | 0.99        | 0.00496         | 0.827(920)          | 0.794(973)           | 0.24          | 0.0853        |
| swa2.            | 0        | 0.98        | 0.808           | 0.808(895)          | 0.791(2252)          | 0.0629        | 0.174         |
| swei.            | 0        | 0.99        | 0.657           | 0.790(1278)         | 0.783(3669)          | 0.0256        | 0.0575        |
| top7.            | 0        | 1.02        | 0.431           | 0.792(416)          | 0.766(350)           | 0.103         | 0.131         |
| top8.            | 0        | 1.03        | 0.837           | 0.783(148)          | 0.775(291)           | 0.0362        | 0.176         |
| ucl2.            | 0        | 1.00        | 0.672           | 0.824(726)          | 0.816(693)           | 0.0417        | 0.0985        |
| uclo.            | 0        | 0.97        | 0.0929          | 0.821(427)          | 0.789(488)           | 0.206         | 0.122         |
| uktr.            | 0        | 0.98        | 0.0971          | 0.834(130)          | 0.777(130)           | 0.378         | 0.228         |
| umr4.            | 0        | 0.94        | 0.282           | 0.789(565)          | 0.769(569)           | 0.113         | 0.105         |
| usc2.            | 0        | 1.00        | 0.618           | 0.815(1293)         | 0.823(1156)          | -0.0382       | 0.0765        |
| wlcc.            | 0        | 0.97        | 0.00908         | 0.820(1644)         | 0.798(1641)          | 0.171         | 0.0655        |
| jea2.            | 0        | 0.99        | 0.826           | 0.807(372)          | 0.810(628)           | -0.0265       | 0.12          |
| kfo4.            | 0        | 0.97        | 0.338           | 0.815(247)          | 0.793(288)           | 0.161         | 0.168         |
| tgco2.           | 0        | 0.97        | 0.339           | 0.803(1032)         | 0.817(499)           | -0.0965       | 0.101         |
| bdrs.            | 0        | 1.11        | 0.33            | 0.830(218)          | 0.814(684)           | 0.137         | 0.141         |
| dutch.           | 0        | 1.00        | 0.954           | 0.819(831)          | 0.822(953)           | -0.00521      | 0.0888        |
| gaw1.            | 0        | 1.00        | 0.199           | 0.795(258)          | 0.819(502)           | -0.176        | 0.137         |
| germ1.           | 0        | 1.01        | 0.171           | 0.849(219)          | 0.822(992)           | 0.203         | 0.148         |
| gpcw1.           | 0        | 0.96        | 0.648           | 0.807(447)          | 0.813(2092)          | -0.0437       | 0.096         |
| neuc1.           | 0        | 0.97        | 0.744           | 0.804(215)          | 0.801(750)           | 0.0469        | 0.143         |
| spsp3.           | 0        | 1.01        | 0.974           | 0.801(153)          | 0.808(2337)          | -0.00491      | 0.149         |
| swed1.           | 0        | 0.99        | 0.0777          | 0.802(2909)         | 0.791(2844)          | 0.083         | 0.047         |
| ukwa1.           | 0        | 0.99        | 0.362           | 0.813(2789)         | 0.805(2372)          | 0.0464        | 0.0509        |
| usa4.            | 0        | 1.02        | 0.613           | 0.819(256)          | 0.815(2930)          | 0.0241        | 0.0475        |
| usa5.            | 0        | 0.99        | 0.778           | 0.805(1107)         | 0.801(1316)          | 0.0213        | 0.0757        |
| deCODE.          | 0        | 1.00        | 0.0243          | 0.795(1972)         | 0.795(192602)        | 0.0943        | 0.0419        |
| EstonianBiobank. | 1        | 1.00        | 0.388           | 0.811(407)          | 0.797(17209)         | 0.0791        | 0.0916        |
| HUNT.            | 0        | 1.00        | 0.723           | 0.806(905)          | 0.803(41914)         | 0.0215        | 0.0605        |
| iPSYCH.          | 0        | 0.99        | 0.0621          | 0.822(1758)         | 0.808(5937)          | 0.0936        | 0.0502        |
| UKBiobank.       | 0        | 1.00        | 0.266           | 0.815(1454)         | 0.807(58113)         | 0.201         | 0.181         |
| bmron.           | 0        | 1.01        | 0.253           | 0.833(252)          | 0.801(121)           | 0.239         | 0.09          |
| bmrus.           | 0        | 1.00        | 0.587           | 0.823(522)          | 0.810(460)           | 0.0644        | 0.118         |
| graza.           | 0        | 0.96        | 0.462           | 0.826(144)          | 0.801(66)            | 0.207         | 0.281         |
| greek.           | 0        | 0.99        | 0.132           | 0.834(186)          | 0.781(87)            | 0.356         | 0.237         |
| norgs.           | 0        | 1.02        | 0.627           | 0.832(101)          | 0.823(315)           | 0.11          | 0.226         |
| noroe.           | 0        | 0.98        | 0.0353          | 0.842(313)          | 0.797(4367)          | 0.245         | 0.117         |
|                  | <b>1</b> | <b>0.99</b> | <b>2.35e-08</b> | <b>0.812(41917)</b> | <b>0.799(371549)</b> | <b>0.0662</b> | <b>0.0119</b> |

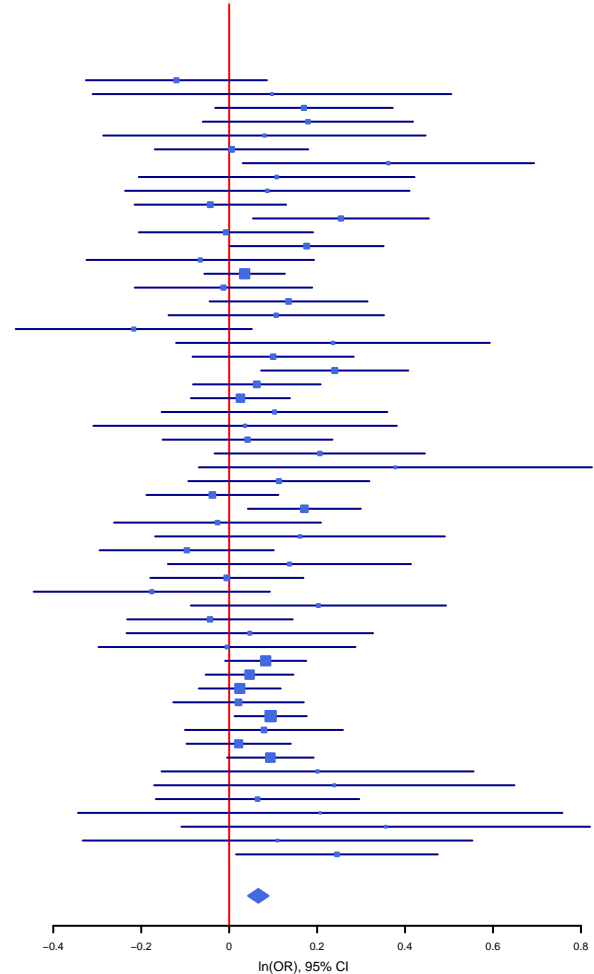

rs696366

C/A

3:107757060

het\_P:

0.0318

het\_I:

27.4

|                  | ngt      | info        | p_value         | f_ca(n)             | f_co(n)              | ln(OR)        | STDerr        |
|------------------|----------|-------------|-----------------|---------------------|----------------------|---------------|---------------|
| bmau.            | 0        | 1.01        | 0.949           | 0.527(329)          | 0.527(1810)          | -0.00541      | 0.0853        |
| bm2g.            | 0        | 1.06        | 0.0242          | 0.567(1811)         | 0.520(478)           | 0.345         | 0.153         |
| bm3g.            | 0        | 1.00        | 0.806           | 0.538(489)          | 0.546(880)           | -0.0202       | 0.0822        |
| bmpp.            | 0        | 0.95        | 0.4             | 0.586(410)          | 0.576(689)           | 0.0846        | 0.101         |
| bmsp.            | 0        | 0.94        | 0.761           | 0.552(253)          | 0.527(291)           | 0.0426        | 0.14          |
| bonn.            | 0        | 0.96        | 0.563           | 0.553(669)          | 0.539(1246)          | 0.0413        | 0.0713        |
| butr.            | 0        | 1.06        | 0.00136         | 0.657(236)          | 0.551(236)           | 0.424         | 0.132         |
| dub1.            | 1.02     | 0.67        | 0.524(1796)     | 0.524(1796)         | 0.054                | 0.127         |               |
| edf1.            | 0        | 0.94        | 0.0211          | 0.565(275)          | 0.502(272)           | 0.308         | 0.134         |
| fat2.            | 0        | 0.95        | 0.129           | 0.563(722)          | 0.530(1027)          | 0.11          | 0.0726        |
| fran.            | 0        | 1.02        | 0.0033          | 0.583(451)          | 0.527(1630)          | 0.225         | 0.0767        |
| gain.            | 0        | 0.98        | 0.712           | 0.552(706)          | 0.545(593)           | 0.03          | 0.0812        |
| gsk1.            | 0        | 1.04        | 0.89            | 0.540(706)          | 0.545(899)           | -0.00975      | 0.0702        |
| hal2.            | 0        | 0.94        | 0.0656          | 0.578(410)          | 0.544(479)           | 0.19          | 0.103         |
| icuk.            | 0        | 0.97        | 0.43            | 0.538(2456)         | 0.532(4069)          | 0.0294        | 0.0372        |
| js15.            | 0        | 0.95        | 0.972           | 0.566(646)          | 0.566(643)           | -0.0029       | 0.0522        |
| may1.            | 0        | 1.02        | 0.113           | 0.571(929)          | 0.543(759)           | 0.112         | 0.0709        |
| mich.            | 0        | 1.04        | 0.593           | 0.543(481)          | 0.533(399)           | 0.0506        | 0.0946        |
| pf1e.            | 0        | 0.96        | 0.129           | 0.557(375)          | 0.511(346)           | 0.168         | 0.111         |
| rom3.            | 0        | 0.98        | 0.77            | 0.591(233)          | 0.580(198)           | 0.0429        | 0.147         |
| si2c.            | 0        | 0.91        | 0.17            | 0.575(628)          | 0.539(1219)          | 0.106         | 0.0768        |
| stp1.            | 0        | 0.93        | 0.832           | 0.541(920)          | 0.540(973)           | 0.0147        | 0.0689        |
| swa2.            | 0        | 0.98        | 0.402           | 0.563(895)          | 0.539(2252)          | 0.0498        | 0.0594        |
| swei.            | 0        | 1.00        | 0.0536          | 0.559(1278)         | 0.537(3669)          | 0.0909        | 0.0471        |
| top7.            | 0        | 1.01        | 0.656           | 0.540(416)          | 0.569(350)           | -0.0485       | 0.109         |
| top8.            | 0        | 1.00        | 0.91            | 0.571(148)          | 0.561(291)           | 0.0168        | 0.149         |
| ucl2.            | 0        | 0.99        | 0.00193         | 0.569(726)          | 0.515(693)           | 0.239         | 0.0769        |
| ucio.            | 0        | 0.91        | 0.992           | 0.546(427)          | 0.547(488)           | 0.001         | 0.1           |
| uktr.            | 0        | 0.98        | 0.335           | 0.523(130)          | 0.481(130)           | 0.172         | 0.178         |
| umr4.            | 0        | 0.98        | 0.343           | 0.547(565)          | 0.527(569)           | 0.081         | 0.0855        |
| usc2.            | 0        | 1.00        | 4.87e-05        | 0.596(1293)         | 0.545(1156)          | -0.243        | 0.0598        |
| wlcc.            | 0        | 0.94        | 0.642           | 0.531(1644)         | 0.535(1641)          | -0.0242       | 0.0521        |
| jea2.            | 0        | 0.99        | 0.729           | 0.603(372)          | 0.584(628)           | 0.0334        | 0.0967        |
| kfo4.            | 0        | 1.01        | 0.277           | 0.579(247)          | 0.554(288)           | 0.144         | 0.133         |
| tgco2.           | 0        | 0.98        | 0.479           | 0.544(1032)         | 0.528(499)           | 0.056         | 0.079         |
| bdrs.            | 0        | 0.98        | 0.772           | 0.546(218)          | 0.553(684)           | -0.0329       | 0.113         |
| dutch.           | 0        | 0.95        | 0.262           | 0.567(831)          | 0.553(953)           | 0.0754        | 0.0701        |
| gawil.           | 0        | 0.94        | 0.9             | 0.563(268)          | 0.562(262)           | -0.0142       | 0.113         |
| germ1.           | 0        | 1.01        | 0.759           | 0.558(219)          | 0.550(992)           | 0.0333        | 0.108         |
| gpcw1.           | 0        | 0.98        | 0.544           | 0.566(447)          | 0.553(2092)          | 0.0457        | 0.0755        |
| neuc1.           | 0        | 0.96        | 0.173           | 0.568(215)          | 0.532(750)           | 0.156         | 0.114         |
| spsp3.           | 0        | 0.99        | 0.0189          | 0.596(153)          | 0.520(2337)          | 0.286         | 0.122         |
| swed1.           | 0        | 1.00        | 0.0459          | 0.563(2909)         | 0.548(2844)          | 0.0759        | 0.0381        |
| ukwa1.           | 0        | 1.00        | 0.159           | 0.529(2789)         | 0.542(2372)          | -0.0563       | 0.04          |
| usa4.            | 0        | 1.00        | 0.0043          | 0.569(2956)         | 0.551(2930)          | 0.0647        | 0.0374        |
| usaw5.           | 0        | 0.97        | 0.397           | 0.547(1107)         | 0.544(1316)          | 0.052         | 0.0614        |
| deCODE.          | 0        | 1.00        | 0.0996          | 0.557(1972)         | 0.557(192602)        | -0.0554       | 0.0337        |
| EstonianBiobank. | 1        | 1.00        | 0.83            | 0.542(407)          | 0.547(17209)         | -0.0153       | 0.0712        |
| HUNT.            | 0        | 0.99        | 0.653           | 0.556(905)          | 0.550(41914)         | 0.0218        | 0.0485        |
| iPSYCH.          | 0        | 1.00        | 0.245           | 0.579(1758)         | 0.569(5937)          | 0.0452        | 0.0389        |
| UKBiobank.       | 0        | 0.99        | 0.314           | 0.545(1454)         | 0.534(58113)         | 0.174         | 0.173         |
| bmrom.           | 0        | 0.98        | 0.889           | 0.596(251)          | 0.596(251)           | 0.0252        | 0.18          |
| bmrus.           | 0        | 1.01        | 0.387           | 0.587(522)          | 0.563(460)           | 0.08          | 0.0924        |
| graza.           | 0        | 0.96        | 0.832           | 0.551(144)          | 0.539(66)            | 0.0465        | 0.22          |
| greek.           | 0        | 0.95        | 0.663           | 0.574(186)          | 0.559(87)            | 0.0848        | 0.195         |
| norgs.           | 0        | 0.93        | 0.0839          | 0.589(101)          | 0.540(315)           | 0.313         | 0.181         |
| noroe.           | 0        | 0.97        | 0.651           | 0.570(313)          | 0.559(4367)          | 0.0394        | 0.0873        |
|                  | <b>1</b> | <b>0.99</b> | <b>4.46e-08</b> | <b>0.558(41917)</b> | <b>0.550(371549)</b> | <b>0.0516</b> | <b>0.0094</b> |

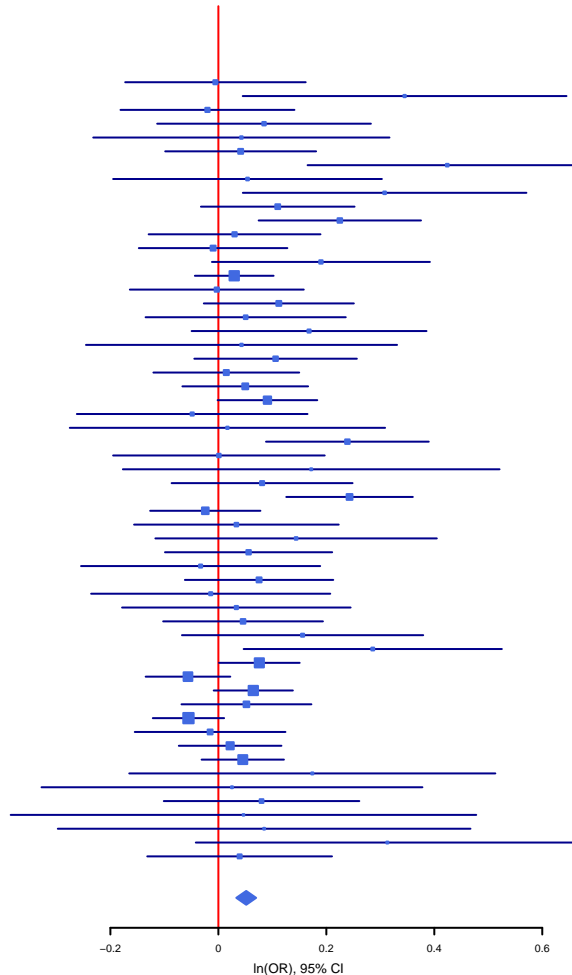

rs112481526

A/G

4:123076007

het\_P:

0.56

het\_I:

0.0

|                  | ngt | info | p_value | f_ca(n)     | f_co(n)       | ln(OR)  | STDerr |
|------------------|-----|------|---------|-------------|---------------|---------|--------|
| bmau.            | 0   | 1.01 | 0.074   | 0.718(329)  | 0.750(1810)   | -0.169  | 0.0949 |
| bmg2.            | 0   | 0.97 | 0.00404 | 0.635(181)  | 0.706(478)    | -0.484  | 0.169  |
| bmg3.            | 0   | 1.00 | 0.392   | 0.684(489)  | 0.705(880)    | -0.0753 | 0.0879 |
| bmpo.            | 0   | 1.01 | 0.371   | 0.689(410)  | 0.707(689)    | -0.0917 | 0.102  |
| bmsp.            | 0   | 0.93 | 0.834   | 0.754(253)  | 0.751(291)    | -0.0341 | 0.163  |
| bonn.            | 0   | 0.96 | 0.0731  | 0.669(669)  | 0.693(1246)   | -0.137  | 0.0763 |
| butr.            | 0   | 0.99 | 0.405   | 0.740(236)  | 0.763(236)    | -0.126  | 0.151  |
| club1.           | 0   | 0.94 | 0.011   | 0.751(150)  | 0.751(150)    | -0.334  | 0.155  |
| edl1.            | 0   | 0.92 | 0.268   | 0.743(275)  | 0.766(272)    | -0.17   | 0.154  |
| fat2.            | 0   | 0.97 | 0.366   | 0.727(722)  | 0.735(1027)   | -0.0724 | 0.0801 |
| fran.            | 0   | 0.98 | 0.393   | 0.705(451)  | 0.716(1630)   | -0.0725 | 0.0848 |
| gain.            | 0   | 0.96 | 0.716   | 0.730(706)  | 0.734(593)    | -0.0331 | 0.0913 |
| gsk1.            | 0   | 0.98 | 0.808   | 0.728(706)  | 0.732(899)    | -0.0197 | 0.0812 |
| hal2.            | 0   | 1.02 | 0.365   | 0.747(410)  | 0.729(479)    | 0.102   | 0.113  |
| icuk.            | 0   | 0.98 | 0.0557  | 0.725(2456) | 0.739(4069)   | -0.0792 | 0.0413 |
| jst5.            | 0   | 1.00 | 0.802   | 0.723(646)  | 0.735(643)    | -0.0226 | 0.09   |
| may1.            | 0   | 0.98 | 0.762   | 0.728(929)  | 0.713(759)    | 0.0242  | 0.0802 |
| mich.            | 0   | 0.97 | 0.234   | 0.715(481)  | 0.742(399)    | -0.131  | 0.111  |
| pf1e.            | 0   | 1.07 | 0.416   | 0.720(375)  | 0.739(346)    | -0.0964 | 0.118  |
| rom3.            | 0   | 1.03 | 0.96    | 0.750(233)  | 0.741(198)    | 0.00827 | 0.163  |
| sl2c.            | 0   | 0.91 | 0.286   | 0.753(628)  | 0.734(1219)   | 0.0939  | 0.0881 |
| stp1.            | 0   | 0.91 | 0.202   | 0.715(920)  | 0.731(973)    | -0.0984 | 0.0771 |
| swa2.            | 0   | 0.98 | 0.0162  | 0.653(885)  | 0.691(2252)   | -0.152  | 0.0631 |
| swei.            | 0   | 0.99 | 0.0146  | 0.678(1278) | 0.705(3669)   | -0.124  | 0.0506 |
| top7.            | 0   | 0.95 | 0.732   | 0.695(416)  | 0.680(350)    | 0.0415  | 0.121  |
| top8.            | 0   | 1.01 | 0.922   | 0.710(148)  | 0.698(291)    | -0.0159 | 0.163  |
| ucl2.            | 0   | 1.03 | 0.102   | 0.697(726)  | 0.724(693)    | -0.135  | 0.0823 |
| uclo.            | 0   | 0.93 | 0.34    | 0.710(427)  | 0.730(488)    | -0.106  | 0.111  |
| uktr.            | 0   | 1.06 | 0.0922  | 0.727(130)  | 0.792(130)    | -0.341  | 0.202  |
| ume4.            | 0   | 0.99 | 0.848   | 0.686(565)  | 0.684(569)    | 0.0176  | 0.0924 |
| usc2.            | 0   | 0.97 | 0.205   | 0.742(1293) | 0.751(1156)   | -0.0872 | 0.0688 |
| wtc.             | 0   | 0.93 | 0.365   | 0.742(1644) | 0.743(1641)   | -0.0541 | 0.0598 |
| jea2.            | 0   | 0.99 | 0.132   | 0.655(372)  | 0.690(628)    | -0.152  | 0.101  |
| kfo4.            | 0   | 0.93 | 0.0723  | 0.694(247)  | 0.726(288)    | -0.273  | 0.152  |
| tgco2.           | 0   | 0.97 | 0.638   | 0.730(1032) | 0.721(499)    | 0.0417  | 0.0887 |
| bdtrs.           | 0   | 0.96 | 0.448   | 0.702(218)  | 0.684(684)    | 0.0943  | 0.124  |
| dutch.           | 0   | 0.98 | 0.674   | 0.698(831)  | 0.698(953)    | 0.0118  | 0.0744 |
| gawil.           | 0   | 0.98 | 0.378   | 0.683(268)  | 0.708(502)    | -0.105  | 0.119  |
| germ1.           | 0   | 0.99 | 0.773   | 0.701(219)  | 0.688(992)    | 0.0345  | 0.12   |
| gpw1.            | 0   | 0.96 | 0.23    | 0.738(447)  | 0.757(2092)   | -0.104  | 0.0865 |
| neuc1.           | 0   | 0.95 | 0.801   | 0.765(215)  | 0.754(750)    | 0.0337  | 0.134  |
| spsp3.           | 0   | 0.96 | 0.327   | 0.744(153)  | 0.727(2337)   | 0.136   | 0.138  |
| swed1.           | 0   | 0.98 | 0.0399  | 0.683(2909) | 0.702(2844)   | -0.0853 | 0.0415 |
| ukwa1.           | 0   | 0.99 | 0.077   | 0.725(2789) | 0.735(2372)   | -0.0789 | 0.0452 |
| usaw4.           | 0   | 0.98 | 0.387   | 0.655(2956) | 0.702(2930)   | -0.0396 | 0.0439 |
| usaw5.           | 0   | 1.00 | 0.835   | 0.742(1107) | 0.759(1316)   | -0.0144 | 0.0694 |
| deCODE.          | 0   | 1.00 | 0.0256  | 0.761(1972) | 0.761(192602) | -0.0862 | 0.0386 |
| EstonianBiobank. | 1   | 1.00 | 0.0776  | 0.647(407)  | 0.674(17209)  | -0.132  | 0.0747 |
| HUNT.            | 0   | 0.99 | 0.572   | 0.723(905)  | 0.729(49194)  | -0.0306 | 0.0542 |
| iPSYCH.          | 0   | 0.99 | 0.349   | 0.723(1758) | 0.714(5937)   | 0.0405  | 0.0431 |
| UKBiobank.       | 0   | 1.00 | 0.0879  | 0.727(1454) | 0.735(58113)  | -0.266  | 0.161  |
| bmom.            | 0   | 1.04 | 0.067   | 0.752(225)  | 0.752(225)    | 0.0018  | 0.186  |
| bmrus.           | 0   | 0.97 | 0.186   | 0.693(522)  | 0.711(460)    | -0.137  | 0.103  |
| graza.           | 0   | 1.01 | 0.89    | 0.708(144)  | 0.720(66)     | -0.0331 | 0.239  |
| greek.           | 0   | 1.09 | 0.0739  | 0.834(186)  | 0.769(87)     | 0.403   | 0.226  |
| norgs.           | 0   | 0.96 | 0.82    | 0.721(101)  | 0.721(315)    | -0.0446 | 0.196  |
| noroe.           | 0   | 1.02 | 0.672   | 0.717(313)  | 0.714(4367)   | -0.0387 | 0.0937 |

|   |      |          |              |               |         |        |
|---|------|----------|--------------|---------------|---------|--------|
| 1 | 0.98 | 1.86e-09 | 0.720(41917) | 0.744(371549) | -0.0631 | 0.0105 |
|---|------|----------|--------------|---------------|---------|--------|

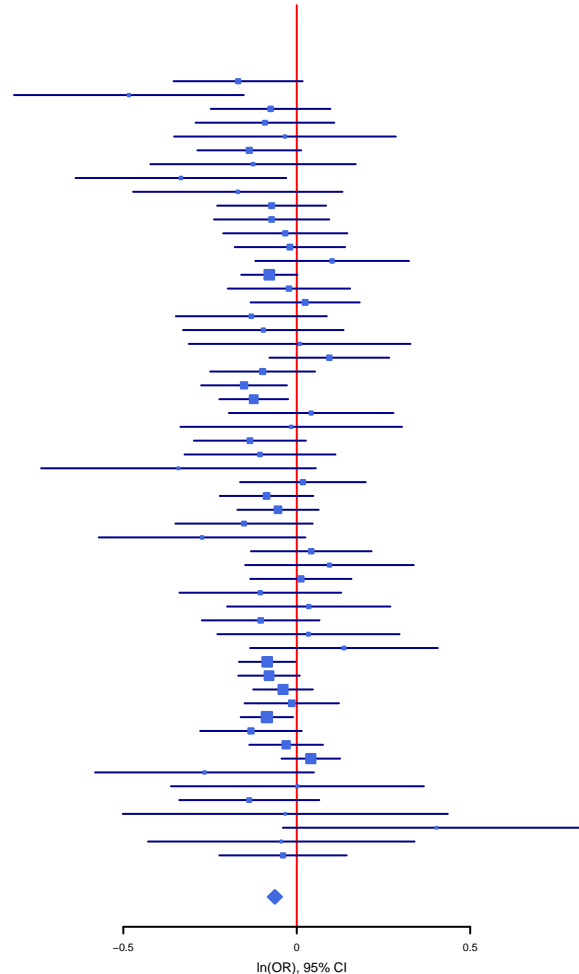

rs28565152

G/A

5:7542911  
het\_P:

0.382

het\_I:

4.4

|                  | ngt      | info        | p_value         | f_ca(n)             | f_co(n)              | ln(OR)         | STDerr        |
|------------------|----------|-------------|-----------------|---------------------|----------------------|----------------|---------------|
| bmau.            | 0        | 1.01        | 0.151           | 0.725(329)          | 0.752(1810)          | -0.137         | 0.0954        |
| bm2g.            | 0        | 1.04        | 0.258           | 0.696(181)          | 0.744(478)           | -0.196         | 0.173         |
| bm3g.            | 0        | 0.97        | 0.409           | 0.740(489)          | 0.755(880)           | -0.0782        | 0.0948        |
| bmco.            | 0        | 0.95        | 0.403           | 0.704(410)          | 0.755(689)           | -0.217         | 0.11          |
| bmsp.            | 0        | 1.02        | 0.0511          | 0.743(253)          | 0.797(291)           | -0.311         | 0.159         |
| bonn.            | 0        | 0.98        | 0.00495         | 0.714(669)          | 0.755(1246)          | -0.224         | 0.0796        |
| butr.            | 0        | 0.95        | 0.607           | 0.737(236)          | 0.751(236)           | -0.0787        | 0.153         |
| dub1.            | 0        | 1.03        | 0.0185          | 0.676(150)          | 0.738(796)           | -0.322         | 0.137         |
| ed1.             | 0        | 0.94        | 0.342           | 0.740(275)          | 0.716(272)           | 0.14           | 0.147         |
| fat2.            | 0        | 0.97        | 0.399           | 0.751(722)          | 0.763(1027)          | -0.0699        | 0.0827        |
| fran.            | 0        | 0.94        | 0.0757          | 0.716(451)          | 0.745(1630)          | -0.157         | 0.0863        |
| gain.            | 0        | 1.01        | 0.759           | 0.758(706)          | 0.763(593)           | -0.0283        | 0.0922        |
| gsk1.            | 0        | 1.03        | 0.0754          | 0.729(706)          | 0.757(899)           | -0.143         | 0.0805        |
| hal2.            | 0        | 0.95        | 0.323           | 0.764(410)          | 0.748(479)           | 0.117          | 0.118         |
| icuk.            | 0        | 0.97        | 0.0683          | 0.742(2456)         | 0.755(4069)          | -0.0777        | 0.0426        |
| jst5.            | 0        | 0.96        | 0.731           | 0.750(646)          | 0.755(643)           | -0.0324        | 0.0942        |
| may1.            | 0        | 1.00        | 0.455           | 0.763(929)          | 0.754(759)           | 0.0624         | 0.0835        |
| mich.            | 0        | 0.98        | 0.146           | 0.729(481)          | 0.759(399)           | -0.163         | 0.113         |
| pf1.             | 0        | 0.91        | 0.387           | 0.764(375)          | 0.781(348)           | -0.118         | 0.136         |
| rom3.            | 0        | 1.03        | 0.742           | 0.735(233)          | 0.737(198)           | -0.0526        | 0.159         |
| st2c.            | 0        | 0.98        | 0.526           | 0.758(628)          | 0.764(1219)          | -0.0548        | 0.0865        |
| stp1.            | 0        | 0.95        | 0.625           | 0.744(920)          | 0.751(973)           | -0.038         | 0.0779        |
| swa2.            | 0        | 0.97        | 0.369           | 0.749(885)          | 0.758(2252)          | -0.0619        | 0.0688        |
| swei.            | 0        | 0.98        | 0.625           | 0.740(1278)         | 0.748(3669)          | -0.0262        | 0.0538        |
| top7.            | 0        | 0.96        | 0.122           | 0.764(416)          | 0.798(350)           | -0.208         | 0.135         |
| top8.            | 0        | 0.93        | 0.422           | 0.744(148)          | 0.763(291)           | -0.142         | 0.177         |
| ucl2.            | 0        | 1.00        | 0.169           | 0.726(726)          | 0.751(693)           | -0.119         | 0.0864        |
| uclo.            | 0        | 1.01        | 0.0642          | 0.723(427)          | 0.761(488)           | -0.201         | 0.109         |
| uktr.            | 0        | 0.95        | 0.171           | 0.679(130)          | 0.733(130)           | -0.273         | 0.199         |
| ume4.            | 0        | 0.96        | 0.46            | 0.716(565)          | 0.728(569)           | -0.0712        | 0.0964        |
| usc2.            | 0        | 1.00        | 0.585           | 0.769(1293)         | 0.773(1156)          | -0.0382        | 0.07          |
| wtoc.            | 0        | 0.96        | 0.546           | 0.730(1644)         | 0.735(1641)          | -0.035         | 0.058         |
| jea2.            | 0        | 0.99        | 0.597           | 0.735(372)          | 0.745(628)           | -0.0571        | 0.108         |
| kfo4.            | 0        | 0.95        | 0.00396         | 0.693(247)          | 0.778(888)           | -0.447         | 0.155         |
| tgco2.           | 0        | 0.95        | 0.323           | 0.759(1032)         | 0.743(499)           | 0.0917         | 0.0926        |
| bdtrs.           | 0        | 0.97        | 0.25            | 0.741(218)          | 0.764(684)           | -0.151         | 0.131         |
| dutch.           | 0        | 0.98        | 0.876           | 0.736(831)          | 0.740(953)           | -0.0122        | 0.0779        |
| gawli.           | 0        | 0.97        | 0.381           | 0.760(268)          | 0.746(502)           | 0.114          | 0.13          |
| germ1.           | 0        | 1.02        | 0.134           | 0.742(219)          | 0.769(992)           | -0.187         | 0.125         |
| gpcw1.           | 0        | 0.97        | 0.964           | 0.769(447)          | 0.766(2092)          | 0.00399        | 0.0889        |
| neuc1.           | 0        | 0.99        | 0.774           | 0.730(407)          | 0.736(1720)          | -0.0128        | 0.0808        |
| sp3.             | 0        | 0.95        | 0.215           | 0.742(153)          | 0.775(2337)          | -0.175         | 0.141         |
| swed1.           | 0        | 0.97        | 0.0654          | 0.744(2909)         | 0.757(2844)          | -0.0818        | 0.0444        |
| ukwa1.           | 0        | 1.00        | 0.113           | 0.740(2789)         | 0.755(2372)          | -0.0729        | 0.046         |
| usaw4.           | 0        | 0.98        | 0.0908          | 0.750(2956)         | 0.763(2930)          | -0.0738        | 0.0436        |
| usaw5.           | 0        | 0.99        | 0.751           | 0.752(1107)         | 0.757(1316)          | -0.0222        | 0.0704        |
| deCODE.          | 0        | 1.00        | 0.221           | 0.771(1972)         | 0.771(19262)         | 0.0492         | 0.0402        |
| EstonianBiobank. | 1        | 0.99        | 0.874           | 0.730(407)          | 0.736(1720)          | -0.0128        | 0.0808        |
| HUNT.            | 0        | 0.99        | 0.316           | 0.745(905)          | 0.757(41914)         | -0.0562        | 0.056         |
| UKBiobank.       | 0        | 1.00        | 0.153           | 0.737(1454)         | 0.748(58113)         | -0.231         | 0.162         |
| bmrom.           | 0        | 1.02        | 0.409           | 0.733(225)          | 0.753(121)           | -0.154         | 0.187         |
| bmrus.           | 0        | 0.95        | 0.0563          | 0.725(522)          | 0.765(460)           | -0.207         | 0.108         |
| graza.           | 0        | 0.99        | 0.0633          | 0.693(144)          | 0.781(66)            | -0.474         | 0.256         |
| greek.           | 0        | 0.90        | 0.327           | 0.758(186)          | 0.794(87)            | -0.239         | 0.244         |
| noigs.           | 0        | 0.97        | 0.608           | 0.754(101)          | 0.749(315)           | -0.103         | 0.201         |
| noroe.           | 0        | 1.00        | 0.319           | 0.752(313)          | 0.765(4367)          | -0.0979        | 0.0982        |
|                  | <b>1</b> | <b>0.98</b> | <b>1.96e-09</b> | <b>0.743(41917)</b> | <b>0.762(371549)</b> | <b>-0.0671</b> | <b>0.0112</b> |

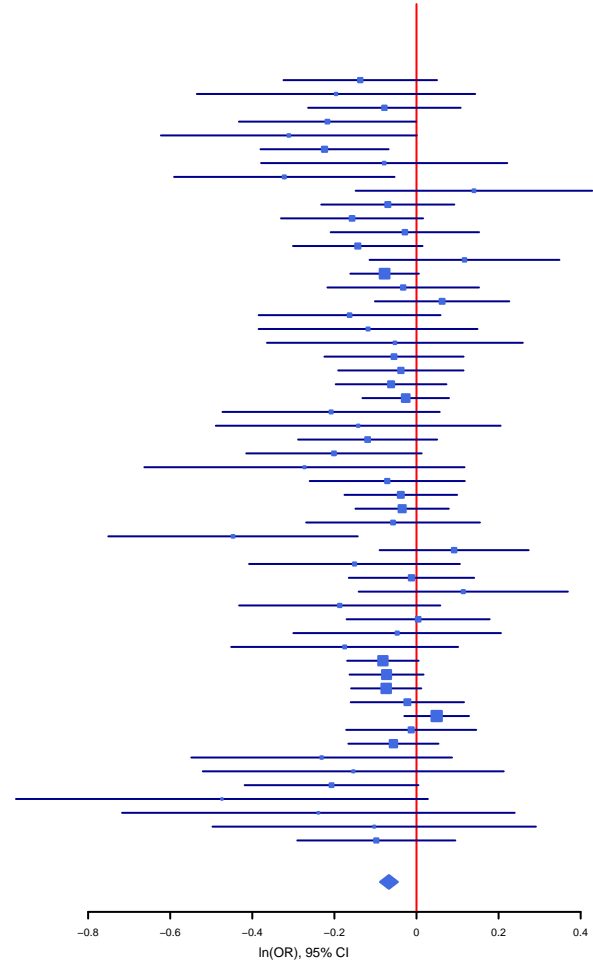

rs6865469

G/T

5:78849505

het\_P:

0.388

het\_I:

4.1

|                  | ngt       | info        | p_value         | f_ca(n)             | f_co(n)              | ln(OR)         | STDerr        |
|------------------|-----------|-------------|-----------------|---------------------|----------------------|----------------|---------------|
| bmau.            | 0         | 0.98        | 0.371           | 0.747(329)          | 0.731(1810)          | 0.0883         | 0.0986        |
| bm2.             | 1         | 1.01        | 0.238           | 0.702(181)          | 0.731(478)           | -0.204         | 0.173         |
| bm3.             | 0         | 0.96        | 0.31            | 0.695(489)          | 0.721(880)           | -0.0929        | 0.0915        |
| bm4.             | 0         | 0.96        | 0.31            | 0.684(410)          | 0.710(689)           | -0.107         | 0.106         |
| bm5.             | 0         | 0.95        | 0.467           | 0.741(253)          | 0.722(291)           | 0.116          | 0.159         |
| bonn.            | 0         | 1.03        | 0.111           | 0.703(669)          | 0.722(1246)          | -0.121         | 0.0758        |
| butr.            | 1         | 1.02        | 0.166           | 0.714(236)          | 0.754(236)           | -0.203         | 0.147         |
| club1.           | 1         | 1.00        | 0.129           | 0.713(150)          | 0.730(409)           | -0.0684        | 0.141         |
| ed1.             | 1         | 0.96        | 0.145           | 0.718(275)          | 0.750(272)           | -0.216         | 0.148         |
| fat2.            | 1         | 0.97        | 0.19            | 0.710(722)          | 0.727(1027)          | -0.104         | 0.079         |
| fran.            | 0         | 0.91        | 0.783           | 0.733(451)          | 0.734(1630)          | 0.0249         | 0.0902        |
| gain.            | 1         | 1.04        | 0.3             | 0.720(706)          | 0.739(593)           | -0.0906        | 0.0875        |
| gsk1.            | 0         | 1.01        | 0.0638          | 0.705(706)          | 0.733(899)           | -0.147         | 0.0793        |
| ha2.             | 1         | 1.01        | 0.753           | 0.726(410)          | 0.731(479)           | -0.0347        | 0.111         |
| icuk.            | 1         | 1.01        | 0.801           | 0.722(2456)         | 0.723(4069)          | -0.0103        | 0.0406        |
| jst5.            | 1         | 0.94        | 0.504           | 0.703(646)          | 0.723(643)           | -0.0609        | 0.0911        |
| may1.            | 1         | 0.98        | 0.818           | 0.731(929)          | 0.738(759)           | -0.0187        | 0.0815        |
| mich.            | 0         | 1.06        | 0.132           | 0.714(481)          | 0.748(399)           | -0.161         | 0.106         |
| pf1e.            | 1         | 1.02        | 0.123           | 0.700(375)          | 0.737(346)           | -0.185         | 0.12          |
| rom3.            | 1         | 0.93        | 0.511           | 0.760(233)          | 0.735(198)           | 0.113          | 0.171         |
| sl2c.            | 1         | 1.02        | 0.515           | 0.741(628)          | 0.734(1219)          | 0.0529         | 0.0812        |
| stp1.            | 1         | 1.00        | 0.703           | 0.727(920)          | 0.726(973)           | 0.0282         | 0.074         |
| sw2.             | 1         | 1.00        | 0.707           | 0.659(885)          | 0.687(2252)          | -0.112         | 0.0622        |
| swei.            | 1         | 1.00        | 0.417           | 0.676(1278)         | 0.690(3669)          | -0.0406        | 0.0501        |
| top7.            | 1         | 0.99        | 0.823           | 0.703(416)          | 0.707(350)           | 0.0268         | 0.12          |
| top8.            | 1         | 0.95        | 0.183           | 0.743(148)          | 0.703(291)           | 0.225          | 0.169         |
| ucl2.            | 1         | 0.99        | 0.0236          | 0.694(726)          | 0.731(693)           | -0.191         | 0.0845        |
| uclo.            | 1         | 0.97        | 0.00832         | 0.677(427)          | 0.735(488)           | -0.283         | 0.107         |
| ukr.             | 1         | 1.03        | 0.182           | 0.685(130)          | 0.739(130)           | -0.287         | 0.193         |
| ume4.            | 1         | 1.01        | 0.304           | 0.643(565)          | 0.663(569)           | -0.0907        | 0.0682        |
| usc2.            | 1         | 0.99        | 0.732           | 0.727(1293)         | 0.726(1156)          | -0.0227        | 0.066         |
| wtc.             | 1         | 1.00        | 0.175           | 0.714(1644)         | 0.727(1641)          | -0.0762        | 0.0562        |
| jea2.            | 0         | 1.00        | 0.114           | 0.696(372)          | 0.726(628)           | -0.164         | 0.104         |
| kfo4.            | 1         | 0.94        | 0.304           | 0.747(247)          | 0.714(288)           | 0.157          | 0.153         |
| tgco2.           | 1         | 1.00        | 0.811           | 0.737(1032)         | 0.728(499)           | 0.0211         | 0.0881        |
| bdtrs.           | 1         | 0.99        | 0.737           | 0.727(218)          | 0.736(684)           | -0.0428        | 0.128         |
| dutch.           | 1         | 1.04        | 0.177           | 0.702(831)          | 0.722(953)           | -0.0994        | 0.0736        |
| gaw4.            | 1         | 0.96        | 0.0819          | 0.681(268)          | 0.724(502)           | -0.201         | 0.116         |
| germ1.           | 1         | 1.02        | 0.518           | 0.750(219)          | 0.731(992)           | -0.0798        | 0.123         |
| gpw1.            | 1         | 1.01        | 0.00646         | 0.709(447)          | 0.753(2092)          | -0.225         | 0.0825        |
| neuc1.           | 1         | 0.96        | 0.479           | 0.752(215)          | 0.739(750)           | 0.0921         | 0.13          |
| spsp3.           | 1         | 1.03        | 0.0502          | 0.774(153)          | 0.727(2337)          | 0.276          | 0.141         |
| swed1.           | 1         | 0.99        | 0.328           | 0.676(2909)         | 0.688(2844)          | -0.0399        | 0.0407        |
| ukwa1.           | 1         | 0.99        | 0.237           | 0.722(2789)         | 0.734(2372)          | -0.0533        | 0.0451        |
| usaw4.           | 1         | 0.97        | 0.351           | 0.681(268)          | 0.736(2930)          | -0.0395        | 0.0424        |
| usaw5.           | 1         | 1.01        | 0.0922          | 0.720(1107)         | 0.747(1316)          | -0.114         | 0.0675        |
| deCODE.          | 0         | 1.00        | 0.0495          | 0.737(1972)         | 0.737(192602)        | -0.0733        | 0.0373        |
| EstonianBiobank. | 1         | 1.00        | 0.915           | 0.672(407)          | 0.676(17209)         | 0.00817        | 0.0761        |
| HUNT.            | 1         | 1.00        | 0.509           | 0.696(905)          | 0.703(41914)         | -0.0347        | 0.0525        |
| iPSYCH.          | 1         | 0.99        | 0.0351          | 0.698(1758)         | 0.716(5937)          | -0.0892        | 0.0423        |
| UKBiobank.       | 0         | 1.00        | 0.26            | 0.717(1454)         | 0.727(58113)         | -0.186         | 0.165         |
| bmom.            | 1         | 1.08        | 0.844           | 0.711(225)          | 0.736(225)           | 0.0349         | 0.177         |
| bmrus.           | 1         | 1.01        | 0.745           | 0.700(522)          | 0.706(460)           | -0.0326        | 0.11          |
| graza.           | 1         | 0.93        | 0.854           | 0.708(144)          | 0.705(66)            | 0.0445         | 0.241         |
| greek.           | 1         | 1.09        | 0.0392          | 0.780(186)          | 0.701(87)            | 0.425          | 0.206         |
| norgs.           | 1         | 1.05        | 0.396           | 0.688(101)          | 0.706(315)           | -0.155         | 0.183         |
| noroe.           | 1         | 0.99        | 0.23            | 0.698(313)          | 0.715(4367)          | -0.112         | 0.093         |
|                  | <b>46</b> | <b>1.00</b> | <b>1.65e-08</b> | <b>0.711(41917)</b> | <b>0.726(371549)</b> | <b>-0.0582</b> | <b>0.0103</b> |

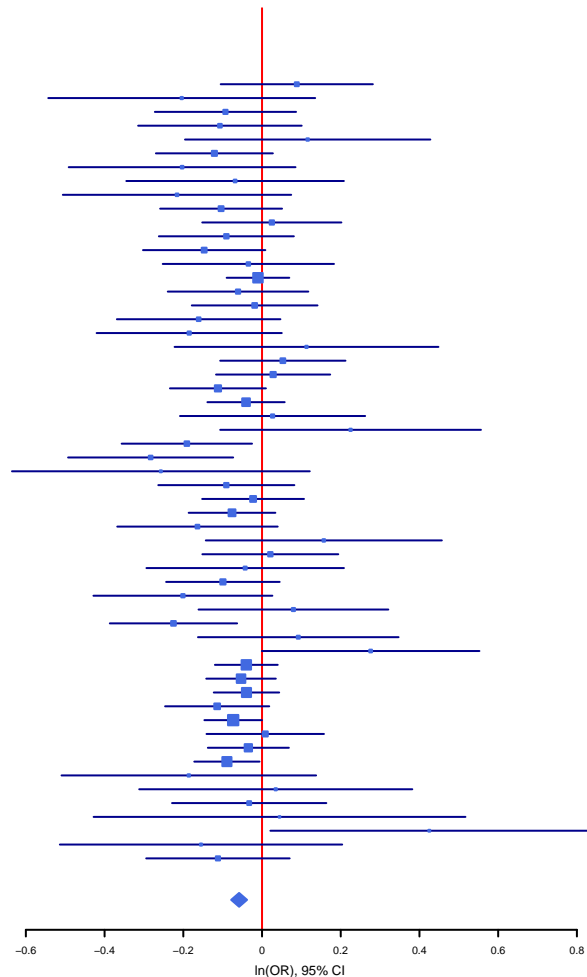

rs6887473

G/A

5:80961069

het\_P: 0.718

het\_I: 0.0

|                  | ngt      | info        | p_value         | f_ca(n)             | f_co(n)              | ln(OR)        | STDerr        |
|------------------|----------|-------------|-----------------|---------------------|----------------------|---------------|---------------|
| bmau.            | 0        | 0.98        | 0.873           | 0.710(329)          | 0.711(1810)          | -0.0152       | 0.0952        |
| bm2g.            | 0        | 1.02        | 0.877           | 0.752(181)          | 0.738(478)           | -0.0272       | 0.176         |
| bm3.             | 0        | 0.96        | 0.148           | 0.754(489)          | 0.730(880)           | 0.138         | 0.0957        |
| bmpp.            | 0        | 0.99        | 0.231           | 0.760(410)          | 0.734(689)           | 0.133         | 0.111         |
| bmsp.            | 0        | 0.91        | 0.792           | 0.729(253)          | 0.728(291)           | 0.0423        | 0.161         |
| bonn.            | 0        | 0.99        | 0.537           | 0.719(669)          | 0.729(1246)          | -0.048        | 0.0779        |
| butr.            | 0        | 1.05        | 0.943           | 0.723(236)          | 0.725(236)           | -0.0102       | 0.142         |
| dub1.            | 0        | 0.93        | 0.019           | 0.734(150)          | 0.682(796)           | 0.235         | 0.146         |
| edf1.            | 0        | 0.98        | 0.738           | 0.671(275)          | 0.664(272)           | 0.0455        | 0.138         |
| fat2.            | 0        | 1.01        | 0.565           | 0.709(722)          | 0.699(1027)          | 0.0441        | 0.0765        |
| fran.            | 0        | 0.99        | 0.669           | 0.707(451)          | 0.699(1630)          | 0.036         | 0.0842        |
| gain.            | 0        | 1.03        | 0.454           | 0.711(706)          | 0.695(593)           | 0.0644        | 0.0859        |
| gsk1.            | 0        | 1.03        | 0.932           | 0.707(706)          | 0.709(899)           | -0.00662      | 0.0777        |
| hai2.            | 0        | 1.01        | 0.792           | 0.711(410)          | 0.720(479)           | 0.0287        | 0.109         |
| icuk.            | 0        | 0.99        | 0.0447          | 0.703(2456)         | 0.686(4069)          | 0.0803        | 0.04          |
| jsf5.            | 0        | 1.06        | 0.594           | 0.703(846)          | 0.711(843)           | -0.0455       | 0.0852        |
| may1.            | 0        | 1.00        | 0.639           | 0.710(929)          | 0.719(759)           | -0.0371       | 0.079         |
| mich.            | 0        | 0.94        | 0.141           | 0.723(481)          | 0.696(399)           | 0.163         | 0.11          |
| pf1e.            | 0        | 0.95        | 0.647           | 0.706(375)          | 0.711(346)           | -0.0559       | 0.122         |
| rom3.            | 0        | 1.07        | 0.108           | 0.764(233)          | 0.717(198)           | 0.254         | 0.158         |
| st2c.            | 0        | 0.95        | 0.23            | 0.739(628)          | 0.710(1219)          | 0.101         | 0.0844        |
| stp1.            | 0        | 0.97        | 0.55            | 0.719(920)          | 0.713(973)           | 0.0444        | 0.0743        |
| swa2.            | 0        | 1.02        | 0.789           | 0.739(865)          | 0.739(2252)          | 0.166         | 0.0682        |
| swei.            | 0        | 1.01        | 0.00691         | 0.770(1278)         | 0.741(3669)          | 0.148         | 0.0548        |
| top7.            | 0        | 0.98        | 0.0177          | 0.779(416)          | 0.717(350)           | 0.302         | 0.128         |
| top8.            | 0        | 0.94        | 0.0412          | 0.798(148)          | 0.723(291)           | 0.377         | 0.185         |
| ucf2.            | 0        | 1.01        | 0.11            | 0.737(726)          | 0.712(693)           | 0.135         | 0.0844        |
| ucio.            | 0        | 1.03        | 0.33            | 0.713(427)          | 0.689(488)           | 0.0998        | 0.102         |
| uktr.            | 0        | 1.04        | 0.851           | 0.700(130)          | 0.708(130)           | -0.0354       | 0.188         |
| umef4.           | 0        | 1.00        | 0.0276          | 0.769(565)          | 0.726(569)           | 0.215         | 0.0977        |
| usc2.            | 0        | 0.97        | 0.28            | 0.719(1293)         | 0.713(1156)          | 0.0715        | 0.0661        |
| wlcc.            | 0        | 1.01        | 0.26            | 0.708(1644)         | 0.699(1641)          | 0.0619        | 0.055         |
| jea2.            | 0        | 0.92        | 0.526           | 0.769(372)          | 0.756(628)           | 0.0734        | 0.116         |
| kfo4.            | 0        | 0.96        | 0.267           | 0.757(247)          | 0.732(288)           | 0.171         | 0.154         |
| tgco2.           | 0        | 1.01        | 0.54            | 0.708(1032)         | 0.701(499)           | 0.0521        | 0.0852        |
| bdrs.            | 0        | 1.03        | 0.087           | 0.741(218)          | 0.704(684)           | 0.213         | 0.125         |
| dutch.           | 0        | 1.01        | 0.137           | 0.733(831)          | 0.708(953)           | 0.112         | 0.0754        |
| gawil.           | 0        | 1.12        | 0.789           | 0.739(258)          | 0.739(502)           | -0.0318       | 0.119         |
| germ1.           | 0        | 0.98        | 0.494           | 0.718(219)          | 0.735(992)           | -0.084        | 0.123         |
| gpcw1.           | 0        | 0.97        | 0.508           | 0.713(447)          | 0.702(2092)          | 0.0551        | 0.0832        |
| neuc1.           | 0        | 0.96        | 0.911           | 0.711(215)          | 0.711(750)           | 0.014         | 0.125         |
| spsp3.           | 0        | 1.00        | 0.273           | 0.665(153)          | 0.696(2337)          | -0.139        | 0.127         |
| swed1.           | 0        | 0.98        | 0.0912          | 0.746(2909)         | 0.733(2844)          | 0.0733        | 0.0434        |
| ukwa1.           | 0        | 0.98        | 0.241           | 0.707(2789)         | 0.697(2372)          | 0.0517        | 0.0442        |
| usaw4.           | 0        | 0.99        | 0.42            | 0.719(256)          | 0.706(2930)          | 0.0604        | 0.042         |
| usaw5.           | 0        | 0.96        | 0.472           | 0.716(1107)         | 0.704(1316)          | 0.0485        | 0.0675        |
| deCODE.          | 0        | 1.00        | 0.222           | 0.751(1972)         | 0.751(192602)        | 0.0471        | 0.0385        |
| EstonianBiobank. | 1        | 0.99        | 0.92            | 0.761(407)          | 0.764(17209)         | -0.00841      | 0.0842        |
| HUNT.            | 0        | 1.00        | 0.389           | 0.766(905)          | 0.756(41914)         | 0.0486        | 0.0564        |
| iPSYCH.          | 0        | 0.98        | 0.34            | 0.725(1758)         | 0.717(5937)          | 0.0414        | 0.0434        |
| UKBiobank.       | 0        | 1.00        | 0.833           | 0.702(1454)         | 0.704(58113)         | -0.0359       | 0.17          |
| brmon.           | 0        | 1.03        | 0.021           | 0.706(2121)         | 0.702(2121)          | -0.224        | 0.183         |
| bmrus.           | 0        | 0.98        | 0.623           | 0.747(522)          | 0.736(460)           | 0.0521        | 0.106         |
| graza.           | 0        | 1.04        | 0.0162          | 0.695(144)          | 0.811(66)            | -0.632        | 0.263         |
| greek.           | 0        | 0.99        | 0.167           | 0.723(186)          | 0.781(87)            | -0.304        | 0.22          |
| norgs.           | 0        | 0.97        | 0.48            | 0.767(101)          | 0.722(315)           | 0.145         | 0.205         |
| noroe.           | 0        | 0.99        | 0.587           | 0.756(313)          | 0.743(4367)          | 0.0539        | 0.0992        |
|                  | <b>1</b> | <b>0.99</b> | <b>8.81e-09</b> | <b>0.727(41917)</b> | <b>0.739(371549)</b> | <b>0.0603</b> | <b>0.0105</b> |

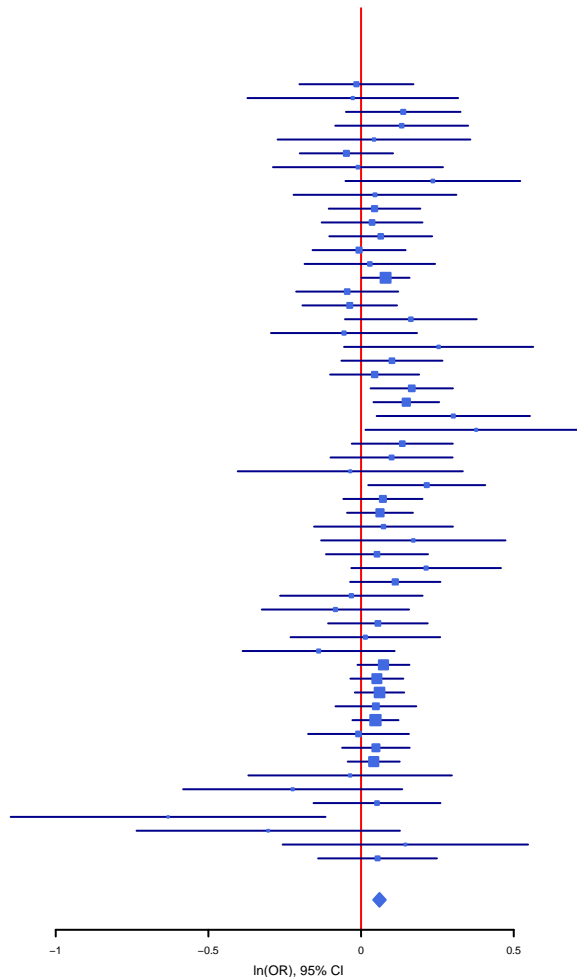

rs10043984

C/T

5:137712121

het\_P:

0.566

het\_I:

0.0

|                  | ngt      | info        | p_value         | f_ca(n)             | f_co(n)              | ln(OR)         | STDerr        |
|------------------|----------|-------------|-----------------|---------------------|----------------------|----------------|---------------|
| bmau.            | 0        | 1.02        | 0.64            | 0.736(329)          | 0.729(1810)          | 0.0447         | 0.0955        |
| bmg2.            | 0        | 1.14        | 0.542           | 0.699(181)          | 0.758(478)           | -0.099         | 0.162         |
| bmg3.            | 0        | 0.99        | 0.24            | 0.732(489)          | 0.757(880)           | -0.111         | 0.0945        |
| bmpo.            | 0        | 1.00        | 0.795           | 0.721(410)          | 0.711(689)           | 0.0276         | 0.106         |
| bmsp.            | 0        | 1.07        | 0.983           | 0.656(253)          | 0.654(291)           | 0.003          | 0.141         |
| bonn.            | 0        | 0.99        | 0.0977          | 0.731(669)          | 0.756(1246)          | -0.132         | 0.0798        |
| butr.            | 0        | 1.05        | 0.00632         | 0.683(236)          | 0.765(236)           | -0.396         | 0.145         |
| club1.           | 0        | 0.95        | 0.86            | 0.722(150)          | 0.722(796)           | 0.0269         | 0.146         |
| edl1.            | 0        | 1.01        | 0.98            | 0.720(275)          | 0.723(272)           | 0.0212         | 0.141         |
| fat2.            | 0        | 0.98        | 0.438           | 0.721(722)          | 0.732(1027)          | -0.0616        | 0.0794        |
| fran.            | 0        | 1.01        | 0.297           | 0.683(451)          | 0.704(1630)          | -0.0854        | 0.082         |
| gain.            | 0        | 1.01        | 0.207           | 0.728(706)          | 0.752(593)           | -0.114         | 0.0904        |
| gsk1.            | 0        | 1.05        | 0.838           | 0.750(706)          | 0.751(899)           | -0.0165        | 0.0806        |
| hal2.            | 0        | 0.97        | 0.444           | 0.704(410)          | 0.726(479)           | -0.0852        | 0.111         |
| icuk.            | 0        | 1.01        | 0.128           | 0.733(2456)         | 0.746(4069)          | -0.0632        | 0.0415        |
| jst5.            | 0        | 1.02        | 0.991           | 0.735(646)          | 0.736(643)           | -0.001         | 0.0893        |
| may1.            | 0        | 1.01        | 0.579           | 0.748(929)          | 0.750(759)           | 0.0455         | 0.082         |
| mich.            | 0        | 1.02        | 0.696           | 0.761(481)          | 0.751(399)           | 0.0435         | 0.111         |
| pf1e.            | 0        | 1.01        | 0.699           | 0.735(375)          | 0.744(346)           | -0.0474        | 0.123         |
| rom3.            | 0        | 1.07        | 0.186           | 0.702(233)          | 0.755(198)           | -0.209         | 0.158         |
| slz2.            | 0        | 1.02        | 0.177           | 0.712(628)          | 0.722(1219)          | -0.108         | 0.0799        |
| stp1.            | 0        | 0.97        | 0.0451          | 0.708(920)          | 0.736(973)           | -0.151         | 0.0752        |
| swa2.            | 0        | 1.00        | 0.004           | 0.733(885)          | 0.756(2252)          | -0.121         | 0.0671        |
| swei.            | 0        | 1.02        | 0.472           | 0.748(1278)         | 0.758(3669)          | -0.0385        | 0.0535        |
| top7.            | 0        | 0.94        | 0.548           | 0.766(416)          | 0.760(350)           | 0.0793         | 0.132         |
| top8.            | 0        | 1.05        | 0.173           | 0.723(148)          | 0.754(291)           | -0.222         | 0.163         |
| ucl2.            | 0        | 1.04        | 0.00727         | 0.762(726)          | 0.807(693)           | -0.245         | 0.0913        |
| ucl0.            | 0        | 0.99        | 0.303           | 0.732(427)          | 0.752(488)           | -0.113         | 0.11          |
| uktr.            | 0        | 1.06        | 0.315           | 0.746(130)          | 0.785(130)           | -0.203         | 0.202         |
| ume4.            | 0        | 0.99        | 0.701           | 0.739(565)          | 0.733(569)           | -0.0369        | 0.096         |
| usc2.            | 0        | 1.02        | 0.00555         | 0.725(1293)         | 0.756(1156)          | -0.185         | 0.0688        |
| wtc0.            | 0        | 0.98        | 0.632           | 0.733(1644)         | 0.739(1641)          | -0.0277        | 0.0578        |
| jea2.            | 0        | 0.99        | 0.0149          | 0.703(372)          | 0.742(628)           | -0.258         | 0.106         |
| kfo4.            | 0        | 0.95        | 0.0373          | 0.760(247)          | 0.719(288)           | 0.32           | 0.153         |
| tgco2.           | 0        | 1.02        | 0.353           | 0.736(1032)         | 0.727(499)           | 0.0815         | 0.0876        |
| bdtrs.           | 0        | 0.83        | 0.0611          | 0.802(218)          | 0.834(684)           | -0.293         | 0.156         |
| dutch.           | 0        | 1.00        | 0.78            | 0.775(631)          | 0.776(953)           | -0.0229        | 0.0817        |
| gawil.           | 0        | 0.84        | 0.0958          | 0.803(268)          | 0.823(262)           | -0.253         | 0.152         |
| germ1.           | 0        | 0.80        | 0.366           | 0.805(219)          | 0.828(992)           | -0.139         | 0.154         |
| gpw1.            | 0        | 1.02        | 0.854           | 0.724(447)          | 0.720(2092)          | 0.015          | 0.0818        |
| neuc1.           | 0        | 0.85        | 0.352           | 0.792(215)          | 0.809(750)           | -0.138         | 0.148         |
| spsp3.           | 0        | 0.96        | 0.814           | 0.674(153)          | 0.667(2337)          | 0.0306         | 0.13          |
| swed1.           | 0        | 0.98        | 0.365           | 0.747(2909)         | 0.755(2844)          | -0.04          | 0.0441        |
| ukwa1.           | 0        | 0.81        | 0.402           | 0.806(2789)         | 0.816(2372)          | -0.0475        | 0.0566        |
| usaw4.           | 0        | 0.97        | 0.21            | 0.713(2956)         | 0.724(2930)          | -0.0521        | 0.0416        |
| usaw5.           | 0        | 0.99        | 0.201           | 0.712(1107)         | 0.723(1316)          | -0.0858        | 0.0671        |
| deCODE.          | 0        | 1.00        | 0.47            | 0.780(1972)         | 0.780(192602)        | -0.0286        | 0.0396        |
| EstonianBiobank. | 1        | 0.92        | 0.315           | 0.696(407)          | 0.713(17209)         | -0.0796        | 0.0791        |
| HUNT.            | 0        | 1.00        | 0.367           | 0.754(905)          | 0.765(41914)         | -0.0511        | 0.0567        |
| iPSYCH.          | 0        | 1.00        | 0.365           | 0.762(1758)         | 0.770(5937)          | -0.0411        | 0.0454        |
| UKBiobank.       | 0        | 1.00        | 0.222           | 0.731(1454)         | 0.743(58113)         | -0.2           | 0.164         |
| bmrom.           | 0        | 1.11        | 0.002           | 0.709(225)          | 0.698(121)           | 0.0172         | 0.17          |
| bmrus.           | 1        | 0.97        | 0.949           | 0.722(522)          | 0.721(460)           | 0.00658        | 0.104         |
| graza.           | 0        | 0.90        | 0.0255          | 0.705(144)          | 0.795(66)            | -0.622         | 0.278         |
| greek.           | 1        | 1.02        | 0.803           | 0.726(186)          | 0.736(87)            | -0.0517        | 0.207         |
| norgs.           | 1        | 1.00        | 0.97            | 0.748(101)          | 0.737(315)           | 0.00727        | 0.196         |
| noroe.           | 0        | 1.01        | 0.719           | 0.746(313)          | 0.759(4367)          | -0.0352        | 0.0978        |
|                  | <b>4</b> | <b>0.98</b> | <b>3.71e-08</b> | <b>0.741(41917)</b> | <b>0.764(371549)</b> | <b>-0.0593</b> | <b>0.0108</b> |

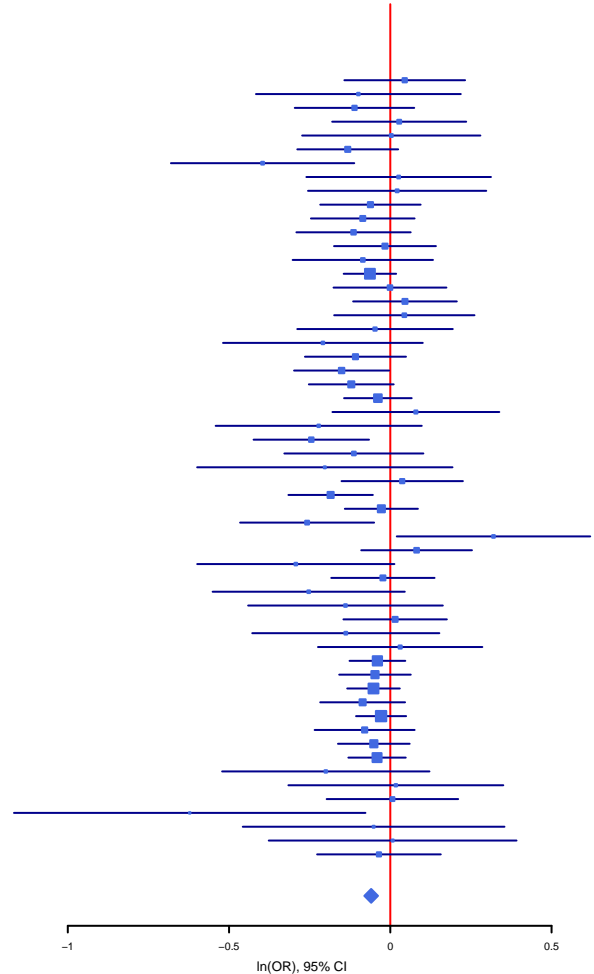



rs10866641

T/C

5:169289206

het\_P:

0.181

het\_I:

14.5

|                  | ngt         | info            | p_value             | f_ca(n)              | f_co(n)       | ln(OR)        | STDerr |
|------------------|-------------|-----------------|---------------------|----------------------|---------------|---------------|--------|
| bmau.            | 1           | 1.00            | 0.147               | 0.593(329)           | 0.563(1810)   | 0.126         | 0.0867 |
| bm2.             | 1           | 1.01            | 0.589               | 0.539(181)           | 0.560(478)    | -0.0835       | 0.155  |
| bm3.             | 1           | 1.01            | 0.0679              | 0.577(489)           | 0.541(880)    | 0.15          | 0.0821 |
| bmpo.            | 0           | 0.98            | 0.864               | 0.524(410)           | 0.532(689)    | 0.0166        | 0.0963 |
| bmsp.            | 1           | 1.04            | 0.418               | 0.601(253)           | 0.623(291)    | -0.112        | 0.139  |
| bonn.            | 1           | 1.00            | 0.384               | 0.559(669)           | 0.544(1246)   | 0.061         | 0.07   |
| butr.            | 1           | 1.06            | 0.201               | 0.595(236)           | 0.553(236)    | 0.165         | 0.129  |
| dub1.            | 0           | 0.98            | 0.548               | 0.557(150)           | 0.554(796)    | 0.0248        | 0.13   |
| edf1.            | 0           | 1.00            | 0.95                | 0.590(275)           | 0.590(272)    | -0.00813      | 0.129  |
| fat2.            | 0           | 1.01            | 0.1                 | 0.593(722)           | 0.562(1027)   | 0.116         | 0.0707 |
| fran.            | 0           | 0.99            | 0.115               | 0.598(451)           | 0.573(1630)   | 0.123         | 0.0779 |
| gain.            | 0           | 1.01            | 0.0169              | 0.582(706)           | 0.535(593)    | 0.191         | 0.0799 |
| gsk1.            | 1           | 1.01            | 0.399               | 0.583(706)           | 0.570(899)    | 0.0605        | 0.0718 |
| hai2.            | 1           | 0.96            | 0.243               | 0.589(410)           | 0.570(479)    | 0.12          | 0.103  |
| icuk.            | 1           | 1.02            | 0.663               | 0.576(2456)          | 0.574(4069)   | 0.016         | 0.0367 |
| js15.            | 0           | 0.98            | 0.212               | 0.567(646)           | 0.592(643)    | -0.102        | 0.0815 |
| may1.            | 1           | 1.00            | 0.655               | 0.577(929)           | 0.571(759)    | 0.0323        | 0.0721 |
| mich.            | 1           | 0.98            | 0.252               | 0.567(481)           | 0.543(399)    | 0.112         | 0.0982 |
| pf1e.            | 1           | 1.04            | 0.27                | 0.561(375)           | 0.527(346)    | 0.119         | 0.108  |
| rom3.            | 1           | 0.94            | 0.0536              | 0.564(233)           | 0.629(198)    | -0.293        | 0.152  |
| si2c.            | 0           | 1.05            | 0.2                 | 0.579(628)           | 0.557(1219)   | 0.0914        | 0.0713 |
| stp1.            | 0           | 1.03            | 0.794               | 0.564(920)           | 0.568(973)    | -0.0181       | 0.0658 |
| swa2.            | 0           | 1.01            | 0.211               | 0.595(895)           | 0.562(2252)   | 0.151         | 0.0592 |
| swei.            | 1           | 1.00            | 0.116               | 0.596(1278)          | 0.582(3669)   | 0.0748        | 0.0476 |
| top7.            | 0           | 0.95            | 0.399               | 0.579(416)           | 0.592(350)    | -0.0954       | 0.113  |
| top8.            | 1           | 1.08            | 0.0821              | 0.608(148)           | 0.553(291)    | 0.252         | 0.145  |
| ucl2.            | 1           | 0.96            | 0.00459             | 0.580(726)           | 0.532(693)    | 0.222         | 0.0783 |
| uclo.            | 0           | 0.98            | 0.85                | 0.566(427)           | 0.568(488)    | -0.0183       | 0.0966 |
| uktr.            | 1           | 0.88            | 0.395               | 0.589(130)           | 0.554(130)    | 0.161         | 0.19   |
| um64.            | 1           | 1.03            | 0.15                | 0.512(565)           | 0.580(569)    | 0.122         | 0.0849 |
| usc2.            | 1           | 1.00            | 0.537               | 0.572(1293)          | 0.560(1156)   | 0.0366        | 0.0593 |
| wlcc.            | 0           | 1.02            | 0.409               | 0.554(1644)          | 0.548(1641)   | 0.0415        | 0.0503 |
| jea2.            | 0           | 0.96            | 0.00193             | 0.575(372)           | 0.510(628)    | 0.302         | 0.0975 |
| kfo4.            | 1           | 0.94            | 0.228               | 0.549(247)           | 0.570(288)    | -0.165        | 0.136  |
| tgco2.           | 0           | 0.97            | 0.514               | 0.571(1032)          | 0.585(499)    | -0.0525       | 0.0805 |
| bdrs.            | 1           | 1.03            | 0.849               | 0.567(218)           | 0.569(684)    | 0.0211        | 0.111  |
| dutch.           | 1           | 0.97            | 0.354               | 0.590(831)           | 0.573(953)    | 0.0649        | 0.0701 |
| gaw1.            | 1           | 1.05            | 0.734               | 0.572(268)           | 0.552(502)    | 0.112         | 0.107  |
| germ1.           | 1           | 1.02            | 0.135               | 0.518(219)           | 0.574(992)    | -0.161        | 0.108  |
| gpcw1.           | 1           | 0.99            | 0.218               | 0.575(447)           | 0.552(2092)   | 0.0927        | 0.0753 |
| neuc1.           | 1           | 0.96            | 0.061               | 0.601(215)           | 0.548(750)    | 0.217         | 0.116  |
| spsp3.           | 1           | 1.02            | 0.927               | 0.588(153)           | 0.592(2337)   | -0.011        | 0.12   |
| swed1.           | 1           | 0.99            | 0.168               | 0.588(2909)          | 0.573(2844)   | 0.053         | 0.0384 |
| ukwa1.           | 1           | 1.00            | 0.0325              | 0.579(2789)          | 0.559(2372)   | 0.0863        | 0.0403 |
| usa6.            | 1           | 1.01            | 0.734               | 0.567(2936)          | 0.567(2936)   | -0.0126       | 0.037  |
| usa5.            | 1           | 1.01            | 0.379               | 0.564(1107)          | 0.557(1316)   | 0.0529        | 0.06   |
| deCODE.          | 0           | 1.00            | 0.117               | 0.582(1972)          | 0.582(192602) | 0.0534        | 0.0341 |
| EstonianBiobank. | 1           | 1.00            | 0.957               | 0.553(407)           | 0.552(17209)  | 0.00383       | 0.0718 |
| HUNT.            | 1           | 1.00            | 0.0287              | 0.604(905)           | 0.578(41914)  | 0.107         | 0.0488 |
| iPSYCH.          | 1           | 1.00            | 0.00145             | 0.596(1758)          | 0.566(5937)   | 0.125         | 0.0392 |
| UKBiobank.       | 0           | 1.00            | 0.197               | 0.576(1454)          | 0.563(58113)  | 0.226         | 0.175  |
| bmron.           | 1           | 1.03            | 0.621               | 0.540(251)           | 0.558(121)    | -0.0706       | 0.161  |
| bmrus.           | 0           | 0.97            | 0.0708              | 0.585(522)           | 0.544(460)    | 0.171         | 0.0945 |
| graza.           | 1           | 1.07            | 0.346               | 0.611(144)           | 0.561(66)     | 0.199         | 0.211  |
| greek.           | 0           | 1.06            | 0.29                | 0.545(186)           | 0.500(87)     | 0.191         | 0.181  |
| norgs.           | 0           | 1.00            | 0.41                | 0.582(101)           | 0.559(315)    | 0.143         | 0.173  |
| noroe.           | 1           | 1.01            | 0.677               | 0.582(313)           | 0.576(4367)   | 0.0358        | 0.0861 |
| <b>38</b>        | <b>1.00</b> | <b>2.79e-11</b> | <b>0.578(41917)</b> | <b>0.575(371549)</b> | <b>0.0626</b> | <b>0.0094</b> |        |

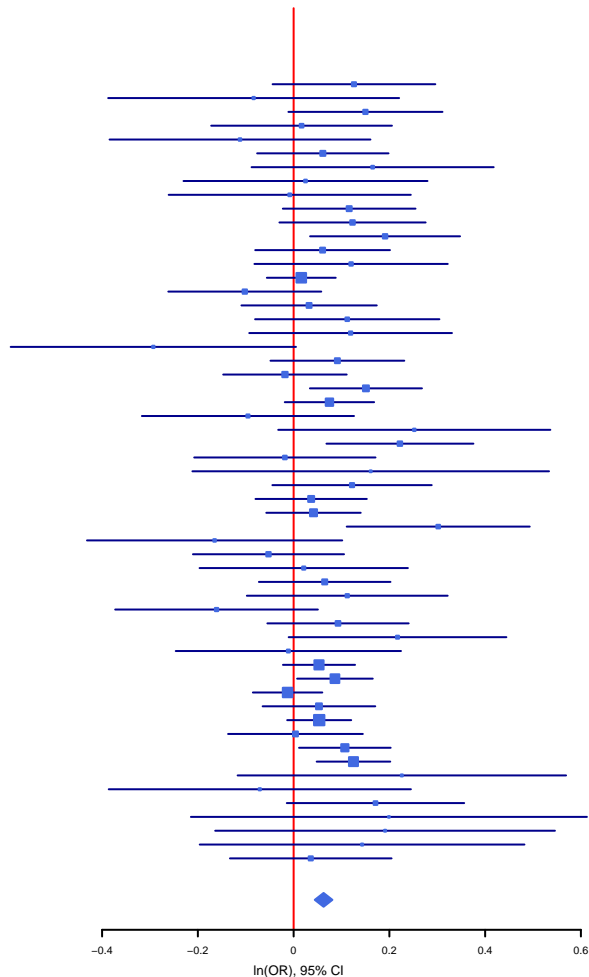

rs13195402

G/T

6:26463575

het\_P:

0.475

het\_I:

0.0

|                  | ngt       | info        | p_value         | f_ca(n)             | f_co(n)              | ln(OR)       | STDerr        |
|------------------|-----------|-------------|-----------------|---------------------|----------------------|--------------|---------------|
| bmaw.            | 0         | 0.99        | 0.162           | 0.914(329)          | 0.895(1810)          | 0.211        | 0.151         |
| bmw2.            | 0         | 0.98        | 0.347           | 0.940(181)          | 0.903(478)           | 0.278        | 0.296         |
| bmw3.            | 0         | 1.00        | 0.221           | 0.929(489)          | 0.927(890)           | 0.206        | 0.165         |
| bmpo.            | 0         | 0.94        | 0.553           | 0.922(410)          | 0.936(689)           | -0.113       | 0.191         |
| bmsp.            | 0         | 1.04        | 0.729           | 0.959(253)          | 0.945(291)           | 0.107        | 0.309         |
| bonn.            | 0         | 0.96        | 0.157           | 0.933(669)          | 0.919(1246)          | 0.195        | 0.137         |
| butr.            | 0         | 0.93        | 0.0924          | 0.940(236)          | 0.963(236)           | -0.541       | 0.321         |
| dub1.            | 0         | 0.97        | 0.937           | 0.886(150)          | 0.885(796)           | 0.016        | 0.203         |
| edi1.            | 0         | 0.97        | 0.705           | 0.901(275)          | 0.899(272)           | -0.065       | 0.213         |
| fal2.            | 0         | 1.00        | 0.206           | 0.929(722)          | 0.913(1027)          | 0.167        | 0.131         |
| fran.            | 0         | 0.97        | 0.412           | 0.951(451)          | 0.943(1630)          | 0.145        | 0.177         |
| gain.            | 0         | 0.99        | 0.0943          | 0.930(706)          | 0.910(593)           | 0.247        | 0.148         |
| gsk1.            | 0         | 1.01        | 0.697           | 0.903(706)          | 0.910(899)           | -0.048       | 0.123         |
| hal2.            | 0         | 0.93        | 0.0834          | 0.898(410)          | 0.925(479)           | -0.318       | 0.183         |
| icuk.            | 0         | 0.96        | 0.00191         | 0.908(2456)         | 0.891(4069)          | 0.195        | 0.0629        |
| jst5.            | 0         | 1.00        | 0.0472          | 0.935(646)          | 0.913(643)           | 0.301        | 0.152         |
| may1.            | 0         | 0.99        | 0.0828          | 0.923(929)          | 0.907(759)           | 0.223        | 0.129         |
| mich.            | 0         | 1.01        | 0.974           | 0.917(461)          | 0.919(399)           | -0.00572     | 0.176         |
| pf1e.            | 0         | 0.94        | 0.143           | 0.931(375)          | 0.912(346)           | 0.304        | 0.208         |
| rom3.            | 0         | 0.93        | 0.961           | 0.958(233)          | 0.963(198)           | 0.0187       | 0.386         |
| st2c.            | 0         | 0.97        | 0.712           | 0.933(628)          | 0.933(1219)          | -0.0548      | 0.148         |
| stp1.            | 0         | 0.93        | 0.931           | 0.920(920)          | 0.925(973)           | -0.0112      | 0.128         |
| swa2.            | 0         | 0.96        | 0.175           | 0.925(885)          | 0.911(2252)          | 0.15         | 0.111         |
| swel.            | 0         | 0.97        | 0.426           | 0.926(1278)         | 0.921(3669)          | 0.0716       | 0.0899        |
| top7.            | 0         | 0.95        | 0.632           | 0.919(416)          | 0.905(350)           | 0.094        | 0.196         |
| top8.            | 0         | 1.07        | 0.289           | 0.917(148)          | 0.890(291)           | 0.264        | 0.249         |
| ucl2.            | 0         | 0.98        | 0.0659          | 0.900(726)          | 0.881(693)           | 0.226        | 0.123         |
| uclo.            | 0         | 1.02        | 0.0195          | 0.912(427)          | 0.880(488)           | 0.371        | 0.159         |
| uktr.            | 0         | 1.05        | 0.619           | 0.902(130)          | 0.889(130)           | 0.14         | 0.281         |
| ume4.            | 0         | 0.98        | 0.479           | 0.936(565)          | 0.945(569)           | -0.129       | 0.182         |
| usc2.            | 0         | 0.98        | 0.332           | 0.933(1293)         | 0.943(1156)          | -0.12        | 0.123         |
| wicc.            | 0         | 0.97        | 0.275           | 0.910(1644)         | 0.901(1641)          | 0.0959       | 0.0877        |
| jesa2.           | 0         | 0.95        | 0.139           | 0.964(372)          | 0.951(628)           | 0.366        | 0.247         |
| kfo4.            | 1         | 1.00        | 0.411           | 0.945(247)          | 0.931(288)           | 0.228        | 0.278         |
| tgco2.           | 0         | 0.97        | 0.92            | 0.926(1032)         | 0.925(499)           | -0.0151      | 0.151         |
| bdrs.            | 0         | 0.96        | 0.46            | 0.920(218)          | 0.907(684)           | 0.153        | 0.208         |
| dutch.           | 1         | 0.99        | 0.322           | 0.921(831)          | 0.910(953)           | 0.122        | 0.123         |
| gawil.           | 1         | 0.94        | 0.995           | 0.927(268)          | 0.928(502)           | -0.0013      | 0.216         |
| germ1.           | 1         | 1.02        | 0.211           | 0.943(219)          | 0.916(992)           | 0.282        | 0.226         |
| gpcr1.           | 0         | 0.98        | 0.0186          | 0.946(447)          | 0.944(2092)          | 0.382        | 0.163         |
| neuc1.           | 1         | 0.91        | 0.0465          | 0.942(215)          | 0.912(750)           | 0.473        | 0.237         |
| spsp3.           | 0         | 0.97        | 0.943           | 0.955(153)          | 0.953(2337)          | -0.021       | 0.293         |
| swed1.           | 1         | 1.02        | 0.00045         | 0.926(2909)         | 0.910(2844)          | 0.241        | 0.0687        |
| ukwa1.           | 1         | 0.99        | 0.00382         | 0.907(2789)         | 0.890(2372)          | 0.193        | 0.0666        |
| usaw4.           | 0         | 1.00        | 0.367           | 0.930(2956)         | 0.927(2930)          | 0.066        | 0.0732        |
| usaw5.           | 0         | 1.01        | 0.00534         | 0.935(1107)         | 0.918(1316)          | 0.326        | 0.117         |
| cisQDE.          | 1         | 1.00        | 0.0695          | 0.930(1972)         | 0.930(1926)          | 0.123        | 0.0679        |
| EstonianBiobank. | 1         | 0.95        | 0.34            | 0.943(407)          | 0.936(17209)         | 0.15         | 0.157         |
| HUNT.            | 1         | 1.00        | 0.261           | 0.917(905)          | 0.909(41914)         | 0.0934       | 0.0832        |
| iPSYCH.          | 1         | 1.00        | 0.148           | 0.905(1758)         | 0.897(5937)          | 0.0941       | 0.0651        |
| UKBiobank.       | 0         | 1.00        | 0.163           | 0.898(1454)         | 0.889(58113)         | 0.258        | 0.185         |
| bmrus.           | 0         | 0.98        | 0.598           | 0.962(522)          | 0.951(460)           | 0.128        | 0.242         |
| norgs.           | 0         | 0.95        | 0.649           | 0.922(101)          | 0.909(315)           | 0.145        | 0.319         |
| norec.           | 0         | 0.99        | 0.00898         | 0.947(313)          | 0.908(4367)          | 0.488        | 0.187         |
|                  | <b>10</b> | <b>0.98</b> | <b>5.75e-15</b> | <b>0.923(41917)</b> | <b>0.919(371549)</b> | <b>0.136</b> | <b>0.0175</b> |

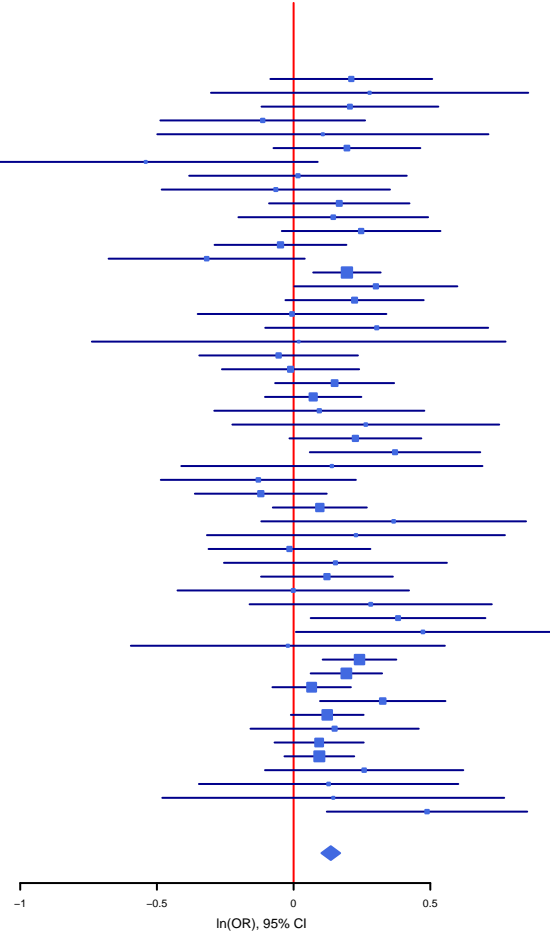

rs1487445

C/T

6:98565211

het\_P:

0.0258

het\_I:

28.6

|                  | ngt      | info        | p_value         | f_ca(n)             | f_co(n)              | ln(OR)         | STDerr        |
|------------------|----------|-------------|-----------------|---------------------|----------------------|----------------|---------------|
| bmau.            | 0        | 1.02        | 0.0141          | 0.491(329)          | 0.541(1810)          | -0.207         | 0.0845        |
| bmg2.            | 0        | 0.98        | 0.0536          | 0.462(181)          | 0.544(478)           | -0.303         | 0.157         |
| bmg3.            | 0        | 1.02        | 0.00337         | 0.483(489)          | 0.538(880)           | -0.238         | 0.0812        |
| bmpo.            | 0        | 1.03        | 0.0324          | 0.521(410)          | 0.572(689)           | -0.202         | 0.0947        |
| bmsp.            | 0        | 1.04        | 0.0243          | 0.485(253)          | 0.552(291)           | -0.303         | 0.135         |
| bonn.            | 0        | 1.02        | 0.377           | 0.506(669)          | 0.528(1246)          | -0.0607        | 0.0688        |
| butr.            | 0        | 1.03        | 0.944           | 0.507(236)          | 0.509(236)           | -0.00894       | 0.128         |
| dub1.            | 0        | 0.93        | 0.0982          | 0.547(150)          | 0.498(796)           | 0.221          | 0.132         |
| edf1.            | 0        | 0.98        | 0.527           | 0.513(275)          | 0.490(272)           | 0.0808         | 0.128         |
| fat2.            | 0        | 1.01        | 0.0399          | 0.474(722)          | 0.501(1027)          | -0.144         | 0.07          |
| fran.            | 0        | 1.01        | 0.0492          | 0.473(451)          | 0.508(1630)          | -0.15          | 0.0765        |
| gain.            | 0        | 1.02        | 0.000754        | 0.467(706)          | 0.535(593)           | -0.268         | 0.0797        |
| gsk1.            | 0        | 1.01        | 0.136           | 0.487(706)          | 0.515(899)           | -0.106         | 0.0712        |
| hai2.            | 0        | 0.95        | 0.939           | 0.506(410)          | 0.496(479)           | -0.00783       | 0.102         |
| icuk.            | 0        | 0.99        | 0.0982          | 0.508(2456)         | 0.522(4069)          | -0.0607        | 0.0367        |
| jsi5.            | 0        | 1.00        | 0.676           | 0.489(846)          | 0.496(843)           | -0.0331        | 0.0793        |
| may1.            | 0        | 0.99        | 0.0138          | 0.490(929)          | 0.541(759)           | -0.177         | 0.0717        |
| mich.            | 0        | 0.99        | 0.657           | 0.506(481)          | 0.500(399)           | 0.0433         | 0.0973        |
| pf1e.            | 0        | 1.00        | 0.725           | 0.510(375)          | 0.503(346)           | 0.0383         | 0.108         |
| rom3.            | 0        | 1.05        | 0.873           | 0.515(233)          | 0.498(198)           | 0.0226         | 0.141         |
| si2c.            | 0        | 0.99        | 0.894           | 0.513(628)          | 0.516(1219)          | -0.00975       | 0.0735        |
| stp1.            | 0        | 1.01        | 0.0187          | 0.488(920)          | 0.524(973)           | -0.155         | 0.0658        |
| swa2.            | 0        | 1.00        | 0.44            | 0.508(865)          | 0.520(2252)          | -0.0465        | 0.0733        |
| swei.            | 0        | 1.00        | 0.0828          | 0.498(1278)         | 0.518(3669)          | -0.0813        | 0.0469        |
| top7.            | 0        | 1.05        | 0.66            | 0.515(416)          | 0.508(350)           | 0.0468         | 0.106         |
| top8.            | 0        | 1.03        | 0.628           | 0.527(148)          | 0.502(291)           | 0.0706         | 0.146         |
| uc12.            | 0        | 0.97        | 0.223           | 0.509(726)          | 0.533(693)           | -0.0944        | 0.0774        |
| uc1o.            | 0        | 1.05        | 0.419           | 0.498(427)          | 0.521(488)           | -0.0753        | 0.0932        |
| uktr.            | 0        | 0.96        | 0.917           | 0.503(130)          | 0.508(130)           | -0.0186        | 0.179         |
| umr4.            | 0        | 1.03        | 0.0418          | 0.468(955)          | 0.511(569)           | -0.172         | 0.0844        |
| usc2.            | 0        | 1.02        | 0.204           | 0.522(1293)         | 0.508(1156)          | 0.074          | 0.0583        |
| wlcc.            | 0        | 1.02        | 0.0394          | 0.501(1644)         | 0.520(1641)          | -0.103         | 0.0502        |
| jea2.            | 0        | 1.00        | 0.86            | 0.557(372)          | 0.566(628)           | 0.0168         | 0.095         |
| kfo4.            | 0        | 0.99        | 0.656           | 0.527(247)          | 0.525(288)           | -0.0587        | 0.132         |
| tgco2.           | 0        | 0.98        | 0.192           | 0.498(1032)         | 0.472(499)           | 0.103          | 0.0791        |
| bdrs.            | 0        | 1.05        | 0.505           | 0.481(218)          | 0.507(684)           | -0.0731        | 0.11          |
| dutch.           | 0        | 0.96        | 0.116           | 0.512(831)          | 0.537(953)           | -0.109         | 0.0695        |
| gawil.           | 0        | 1.04        | 0.363           | 0.541(268)          | 0.522(502)           | 0.0472         | 0.107         |
| germ1.           | 0        | 0.96        | 0.423           | 0.487(219)          | 0.506(992)           | -0.0877        | 0.11          |
| gpcw1.           | 0        | 1.01        | 0.803           | 0.515(447)          | 0.508(2092)          | 0.0183         | 0.0736        |
| neuc1.           | 0        | 0.99        | 0.332           | 0.503(215)          | 0.532(750)           | -0.108         | 0.112         |
| spsp3.           | 0        | 0.98        | 0.31            | 0.507(153)          | 0.536(2337)          | -0.123         | 0.121         |
| swed1.           | 0        | 1.02        | 0.00157         | 0.502(2909)         | 0.532(2844)          | -0.119         | 0.0375        |
| ukwa1.           | 0        | 1.00        | 0.174           | 0.500(2789)         | 0.515(2372)          | -0.0542        | 0.0399        |
| usa4.            | 0        | 1.02        | 0.193           | 0.511(256)          | 0.513(2930)          | -0.0476        | 0.0366        |
| usaw5.           | 0        | 0.99        | 0.0719          | 0.491(1107)         | 0.516(1316)          | -0.108         | 0.0602        |
| deCODE.          | 0        | 1.00        | 0.0186          | 0.504(1972)         | 0.504(192602)        | -0.0788        | 0.0335        |
| EstonianBiobank. | 1        | 1.00        | 0.932           | 0.552(407)          | 0.555(17209)         | -0.0609        | 0.0719        |
| HUNT.            | 0        | 1.00        | 0.583           | 0.516(905)          | 0.523(41914)         | -0.0263        | 0.0479        |
| iPSYCH.          | 0        | 1.00        | 0.00093         | 0.484(1758)         | 0.515(5937)          | -0.127         | 0.0385        |
| UKBiobank.       | 0        | 1.00        | 0.0218          | 0.493(1454)         | 0.515(58113)         | -0.4           | 0.174         |
| bmron.           | 0        | 0.98        | 0.707           | 0.527(212)          | 0.527(212)           | -0.0613        | 0.168         |
| bmrus.           | 0        | 0.94        | 0.696           | 0.544(522)          | 0.555(460)           | -0.037         | 0.0946        |
| graza.           | 0        | 1.13        | 0.322           | 0.545(144)          | 0.599(66)            | -0.204         | 0.205         |
| greek.           | 0        | 1.14        | 0.0412          | 0.470(186)          | 0.573(87)            | -0.363         | 0.178         |
| norgs.           | 0        | 0.95        | 0.178           | 0.478(101)          | 0.507(315)           | -0.241         | 0.179         |
| noroe.           | 0        | 1.03        | 0.0905          | 0.561(313)          | 0.526(4367)          | 0.144          | 0.0852        |
|                  | <b>1</b> | <b>1.00</b> | <b>1.48e-15</b> | <b>0.502(41917)</b> | <b>0.513(371549)</b> | <b>-0.0742</b> | <b>0.0093</b> |

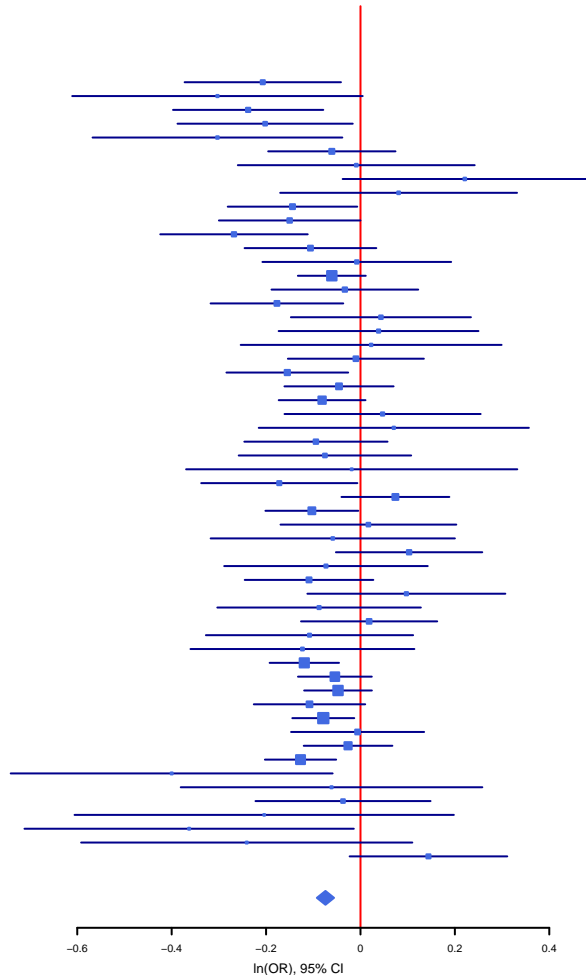

rs4331993

T/A

6:152793572

het\_P:

0.501

het\_I:

0.0

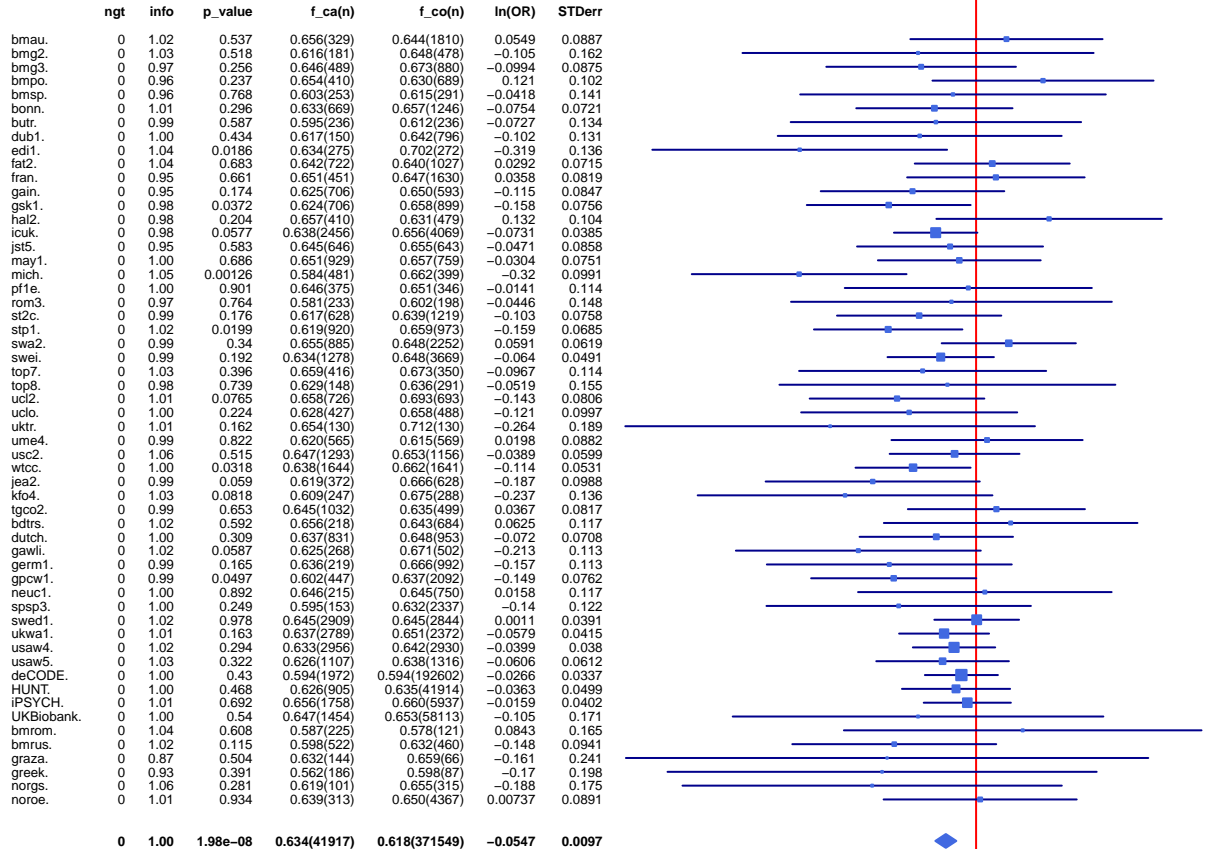-0.6 -0.4 -0.2 0 0.2 0.4  
ln(OR), 95% CI

rs10455979

C/G

6:166995260  
het\_P:

0.583

het\_I:

0.0

|            | ngt         | info            | p_value             | f_ca(n)              | f_co(n)        | ln(OR)        | STDerr |
|------------|-------------|-----------------|---------------------|----------------------|----------------|---------------|--------|
| bmau.      | 0           | 1.04            | 0.269               | 0.502(329)           | 0.524(1810)    | -0.0923       | 0.0835 |
| bmj2.      | 0           | 1.07            | 0.0295              | 0.463(181)           | 0.549(478)     | -0.332        | 0.153  |
| bmj3.      | 0           | 1.06            | 0.166               | 0.493(489)           | 0.525(890)     | -0.11         | 0.0792 |
| bmj6.      | 0           | 1.01            | 0.586               | 0.517(451)           | 0.544(869)     | -0.0655       | 0.0957 |
| bmsp.      | 0           | 1.02            | 0.717               | 0.524(253)           | 0.526(291)     | 0.0485        | 0.134  |
| bonn.      | 0           | 1.02            | 0.00101             | 0.475(669)           | 0.535(1246)    | -0.227        | 0.0691 |
| butr.      | 0           | 0.98            | 0.0484              | 0.454(236)           | 0.517(236)     | -0.262        | 0.133  |
| dub1.      | 0           | 0.96            | 0.234               | 0.512(150)           | 0.541(796)     | -0.154        | 0.13   |
| ed1.       | 0           | 0.96            | 0.332               | 0.518(275)           | 0.548(272)     | -0.126        | 0.13   |
| fat2.      | 0           | 1.03            | 0.449               | 0.508(722)           | 0.522(1027)    | -0.0522       | 0.069  |
| fran.      | 0           | 1.00            | 0.586               | 0.517(451)           | 0.528(1630)    | -0.0416       | 0.0763 |
| gain.      | 0           | 1.04            | 0.167               | 0.512(706)           | 0.541(593)     | -0.108        | 0.078  |
| gsk1.      | 0           | 1.01            | 0.781               | 0.527(706)           | 0.520(899)     | 0.0199        | 0.0713 |
| hal2.      | 0           | 0.95            | 0.13                | 0.497(410)           | 0.535(479)     | -0.155        | 0.102  |
| icuk.      | 0           | 0.98            | 0.2                 | 0.507(2456)          | 0.519(4069)    | -0.0474       | 0.037  |
| jst5.      | 0           | 0.99            | 0.282               | 0.518(646)           | 0.541(643)     | -0.086        | 0.0799 |
| may1.      | 0           | 0.96            | 0.766               | 0.500(929)           | 0.497(759)     | 0.0217        | 0.0729 |
| mich.      | 0           | 0.94            | 0.593               | 0.526(481)           | 0.536(399)     | -0.0534       | 0.0998 |
| pf1e.      | 0           | 0.97            | 0.1                 | 0.514(375)           | 0.552(446)     | -0.182        | 0.111  |
| rom3.      | 0           | 1.02            | 0.254               | 0.505(233)           | 0.553(198)     | -0.163        | 0.143  |
| sl2c.      | 0           | 0.88            | 0.654               | 0.520(628)           | 0.529(1219)    | -0.0347       | 0.0773 |
| stp1.      | 0           | 0.91            | 0.0892              | 0.502(920)           | 0.529(973)     | -0.118        | 0.0694 |
| swa2.      | 0           | 1.02            | 0.166               | 0.524(885)           | 0.541(2252)    | -0.0808       | 0.0584 |
| swei.      | 0           | 1.01            | 0.0997              | 0.519(1278)          | 0.535(3669)    | -0.0766       | 0.0465 |
| top7.      | 0           | 0.99            | 0.389               | 0.532(416)           | 0.522(350)     | 0.094         | 0.109  |
| top8.      | 0           | 1.03            | 0.784               | 0.543(148)           | 0.522(231)     | 0.04          | 0.146  |
| ucl2.      | 0           | 1.01            | 0.915               | 0.496(726)           | 0.481(683)     | 0.00807       | 0.0753 |
| uclo.      | 0           | 0.93            | 0.878               | 0.507(427)           | 0.520(488)     | -0.0152       | 0.0993 |
| uktr.      | 0           | 0.90            | 0.969               | 0.518(130)           | 0.516(130)     | 0.00707       | 0.185  |
| ume4.      | 0           | 1.04            | 0.0949              | 0.561(565)           | 0.595(569)     | -0.142        | 0.0851 |
| usc2.      | 0           | 0.99            | 0.229               | 0.506(1293)          | 0.523(1156)    | -0.0713       | 0.0592 |
| wtcc.      | 0           | 0.90            | 0.811               | 0.514(1644)          | 0.516(1641)    | -0.0127       | 0.0531 |
| jea2.      | 0           | 0.98            | 0.191               | 0.510(372)           | 0.540(628)     | -0.125        | 0.0957 |
| ifo4.      | 0           | 0.96            | 0.922               | 0.523(247)           | 0.551(288)     | 0.0132        | 0.136  |
| tgco2.     | 0           | 0.98            | 0.203               | 0.508(1032)          | 0.529(499)     | -0.101        | 0.079  |
| bdtrs.     | 0           | 1.05            | 0.756               | 0.522(218)           | 0.511(684)     | 0.0341        | 0.11   |
| dutch.     | 0           | 0.96            | 0.237               | 0.494(831)           | 0.517(953)     | -0.0818       | 0.0692 |
| gawli.     | 0           | 0.99            | 0.0836              | 0.556(268)           | 0.514(502)     | 0.191         | 0.111  |
| germ1.     | 0           | 0.96            | 0.82                | 0.521(219)           | 0.519(992)     | 0.0252        | 0.111  |
| gpcw1.     | 0           | 0.98            | 0.18                | 0.492(447)           | 0.517(2092)    | -0.1          | 0.0748 |
| neu1.      | 0           | 0.95            | 0.729               | 0.523(215)           | 0.530(750)     | -0.0396       | 0.114  |
| ssp3.      | 0           | 0.98            | 0.423               | 0.552(153)           | 0.524(2337)    | 0.0969        | 0.121  |
| swed1.     | 0           | 1.01            | 0.0861              | 0.530(2909)          | 0.546(2844)    | -0.065        | 0.0378 |
| ukwa1.     | 0           | 1.01            | 0.188               | 0.519(2789)          | 0.533(2372)    | -0.0523       | 0.0398 |
| usaw4.     | 0           | 0.97            | 0.0549              | 0.504(2956)          | 0.522(2930)    | -0.0722       | 0.0376 |
| usaw5.     | 0           | 1.01            | 0.762               | 0.515(1107)          | 0.523(1316)    | -0.0183       | 0.06   |
| deCODE.    | 0           | 0.98            | 0.0925              | 0.475(1972)          | 0.475(192602)  | -0.0576       | 0.0342 |
| HUNT.      | 0           | 0.99            | 0.0601              | 0.558(905)           | 0.535(41914)   | 0.0903        | 0.0481 |
| IPSYCH.    | 0           | 1.00            | 0.501               | 0.517(1758)          | 0.523(5837)    | -0.0259       | 0.0386 |
| UKBiobank. | 0           | 1.00            | 0.0157              | 0.504(1454)          | 0.527(58113)   | -0.417        | 0.173  |
| bmrom.     | 0           | 0.93            | 0.298               | 0.524(225)           | 0.559(121)     | -0.176        | 0.169  |
| bmrus.     | 0           | 1.02            | 0.226               | 0.513(522)           | 0.540(460)     | -0.11         | 0.0909 |
| graza.     | 0           | 0.94            | 0.809               | 0.470(144)           | 0.486(66)      | -0.0537       | 0.222  |
| greek.     | 0           | 0.94            | 0.448               | 0.483(186)           | 0.515(87)      | -0.145        | 0.191  |
| noigs.     | 0           | 1.00            | 0.278               | 0.501(101)           | 0.522(315)     | -0.185        | 0.171  |
| noroe.     | 0           | 1.01            | 0.821               | 0.509(313)           | 0.511(4367)    | -0.0192       | 0.0847 |
| <b>0</b>   | <b>0.99</b> | <b>4.22e-09</b> | <b>0.512(41917)</b> | <b>0.500(371549)</b> | <b>-0.0556</b> | <b>0.0095</b> |        |

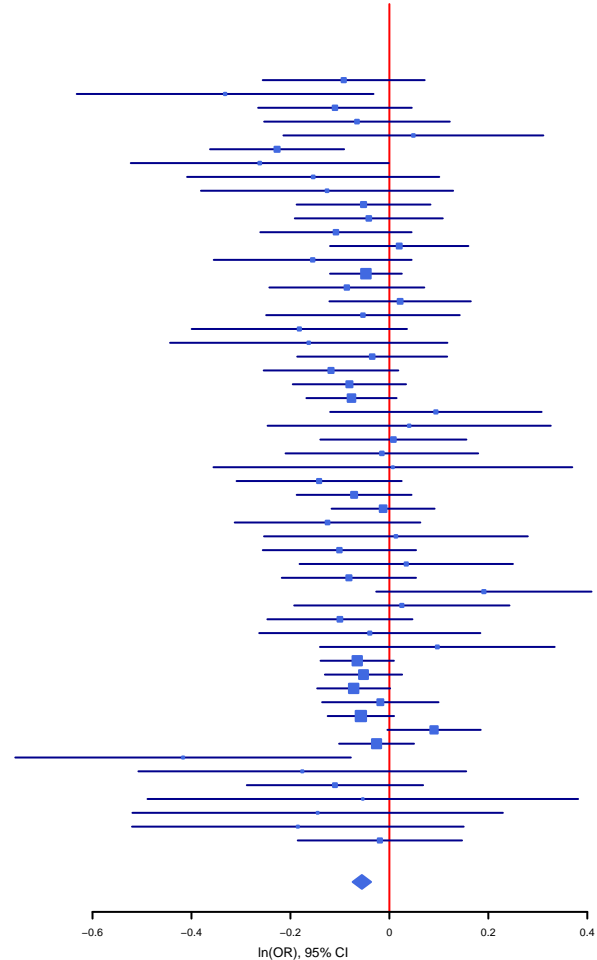

rs12668848

G/A

7:2020995

het\_P:

0,744

het\_I:

0,0

|                  | ngt         | info           | p_value             | f_ca(n)              | f_co(n)       | ln(OR)        | STDerr |
|------------------|-------------|----------------|---------------------|----------------------|---------------|---------------|--------|
| bmau.            | 0           | 0.97           | 0.648               | 0.574(329)           | 0.564(1810)   | 0.0398        | 0.0873 |
| bm2.             | 0           | 1.05           | 0.0787              | 0.641(181)           | 0.594(478)    | 0.278         | 0.158  |
| bm3.             | 0           | 0.99           | 0.178               | 0.587(489)           | 0.612(880)    | -0.113        | 0.0836 |
| bmpo.            | 0           | 1.00           | 0.675               | 0.630(410)           | 0.622(689)    | 0.0416        | 0.0993 |
| bmsp.            | 0           | 0.99           | 0.131               | 0.630(253)           | 0.575(291)    | 0.211         | 0.14   |
| bonn.            | 0           | 1.03           | 0.00463             | 0.636(669)           | 0.591(1246)   | 0.2           | 0.0705 |
| butr.            | 0           | 0.99           | 0.43                | 0.658(236)           | 0.633(236)    | 0.108         | 0.137  |
| club1.           | 0           | 0.97           | 0.76                | 0.542(150)           | 0.516(796)    | 0.0969        | 0.129  |
| ed1.             | 0           | 0.98           | 0.206               | 0.585(275)           | 0.563(272)    | 0.0395        | 0.13   |
| fat2.            | 0           | 0.99           | 0.206               | 0.597(722)           | 0.571(1027)   | 0.0905        | 0.0716 |
| fran.            | 0           | 0.98           | 0.301               | 0.609(451)           | 0.583(1630)   | 0.0819        | 0.0791 |
| gain.            | 0           | 0.99           | 0.134               | 0.597(706)           | 0.566(593)    | 0.122         | 0.0813 |
| gsk1.            | 0           | 1.02           | 0.148               | 0.595(706)           | 0.570(899)    | 0.104         | 0.0717 |
| hal2.            | 0           | 1.02           | 0.62                | 0.582(410)           | 0.584(479)    | 0.0494        | 0.0996 |
| icuk.            | 0           | 0.98           | 0.12                | 0.574(2456)          | 0.562(4069)   | 0.0581        | 0.0374 |
| jst5.            | 0           | 0.98           | 0.969               | 0.604(645)           | 0.600(643)    | 0.00319       | 0.0824 |
| may1.            | 0           | 1.01           | 0.67                | 0.562(929)           | 0.562(759)    | 0.0304        | 0.0715 |
| mich.            | 0           | 1.00           | 0.0277              | 0.621(481)           | 0.572(399)    | 0.218         | 0.0989 |
| pf1e.            | 0           | 0.98           | 0.99                | 0.580(375)           | 0.585(346)    | -0.0015       | 0.112  |
| rom3.            | 0           | 0.93           | 0.948               | 0.635(233)           | 0.624(198)    | 0.00995       | 0.153  |
| st2c.            | 0           | 0.95           | 0.735               | 0.579(628)           | 0.578(1219)   | -0.0255       | 0.0753 |
| stp1.            | 0           | 0.98           | 0.523               | 0.592(920)           | 0.584(973)    | 0.0433        | 0.0679 |
| swa2.            | 0           | 0.99           | 0.95                | 0.615(885)           | 0.602(225)    | 0.055         | 0.0605 |
| swei.            | 0           | 0.98           | 0.534               | 0.612(1278)          | 0.606(3669)   | 0.03          | 0.0483 |
| top7.            | 0           | 1.00           | 0.885               | 0.591(416)           | 0.600(350)    | 0.016         | 0.111  |
| top8.            | 0           | 1.03           | 0.3                 | 0.578(148)           | 0.620(291)    | -0.152        | 0.147  |
| ucl2.            | 0           | 1.00           | 0.0588              | 0.613(726)           | 0.579(693)    | 0.146         | 0.0775 |
| uclo.            | 0           | 1.00           | 0.67                | 0.565(427)           | 0.568(488)    | -0.0411       | 0.0965 |
| uktr.            | 0           | 1.07           | 0.733               | 0.605(130)           | 0.590(130)    | 0.0589        | 0.173  |
| ume4.            | 0           | 1.01           | 0.09                | 0.604(565)           | 0.628(569)    | 0.149         | 0.0682 |
| usc2.            | 0           | 1.01           | 0.954               | 0.589(1293)          | 0.597(1156)   | 0.00349       | 0.0599 |
| wtc.             | 0           | 0.98           | 0.177               | 0.568(1644)          | 0.559(1641)   | 0.0696        | 0.0516 |
| jea2.            | 0           | 0.98           | 0.0348              | 0.651(372)           | 0.600(628)    | 0.209         | 0.0991 |
| kfo4.            | 0           | 1.00           | 0.816               | 0.590(247)           | 0.608(288)    | 0.0311        | 0.134  |
| tgco2.           | 0           | 0.99           | 0.998               | 0.593(1032)          | 0.589(499)    | 0.0002        | 0.0802 |
| bdtrs.           | 0           | 1.04           | 0.517               | 0.617(218)           | 0.593(684)    | 0.0735        | 0.114  |
| dutch.           | 0           | 1.00           | 0.802               | 0.608(831)           | 0.600(953)    | 0.0173        | 0.0694 |
| gaw4.            | 0           | 0.93           | 0.197               | 0.584(268)           | 0.534(268)    | 0.149         | 0.115  |
| germ1.           | 0           | 0.96           | 0.286               | 0.611(219)           | 0.585(992)    | 0.121         | 0.114  |
| gpw1.            | 0           | 1.02           | 0.325               | 0.601(447)           | 0.583(2092)   | 0.0737        | 0.0749 |
| neuc1.           | 0           | 1.01           | 0.301               | 0.616(215)           | 0.579(750)    | 0.118         | 0.114  |
| spsp3.           | 0           | 1.02           | 0.0214              | 0.645(153)           | 0.578(2337)   | 0.286         | 0.124  |
| swed1.           | 0           | 1.02           | 0.00988             | 0.621(2909)          | 0.599(2844)   | 0.0989        | 0.0384 |
| ukwa1.           | 0           | 1.01           | 0.864               | 0.571(2789)          | 0.574(2373)   | -0.00682      | 0.0402 |
| usaw4.           | 0           | 0.97           | 0.0324              | 0.584(2956)          | 0.562(2930)   | 0.0819        | 0.0382 |
| usaw5.           | 0           | 0.99           | 0.707               | 0.589(1107)          | 0.595(1316)   | -0.0232       | 0.0616 |
| deCODE.          | 0           | 1.00           | 0.00905             | 0.568(1972)          | 0.568(192602) | 0.0877        | 0.0336 |
| EstonianBiobank. | 1           | 1.00           | 0.43                | 0.626(407)           | 0.634(17209)  | -0.0583       | 0.0739 |
| HUNT.            | 0           | 1.00           | 0.268               | 0.597(905)           | 0.584(41914)  | 0.0538        | 0.0486 |
| iPSYCH.          | 0           | 1.01           | 0.945               | 0.586(1758)          | 0.585(5937)   | 0.0027        | 0.0389 |
| UKBiobank.       | 0           | 1.00           | 0.419               | 0.574(1454)          | 0.568(58113)  | 0.14          | 0.174  |
| bmom.            | 0           | 1.02           | 0.0276              | 0.602(225)           | 0.608(121)    | 0.375         | 0.17   |
| bmrus.           | 0           | 1.03           | 0.93                | 0.639(522)           | 0.639(460)    | -0.00833      | 0.0941 |
| graza.           | 0           | 1.02           | 0.879               | 0.619(144)           | 0.614(66)     | 0.0332        | 0.218  |
| greek.           | 0           | 1.01           | 0.84                | 0.669(186)           | 0.672(87)     | -0.0398       | 0.197  |
| norgs.           | 0           | 1.01           | 0.314               | 0.649(101)           | 0.603(315)    | 0.179         | 0.178  |
| noroe.           | 0           | 1.00           | 0.774               | 0.574(313)           | 0.573(4367)   | 0.0248        | 0.0866 |
| <b>1</b>         | <b>1.00</b> | <b>1.9e-09</b> | <b>0.595(41917)</b> | <b>0.575(371549)</b> | <b>0.057</b>  | <b>0.0095</b> |        |

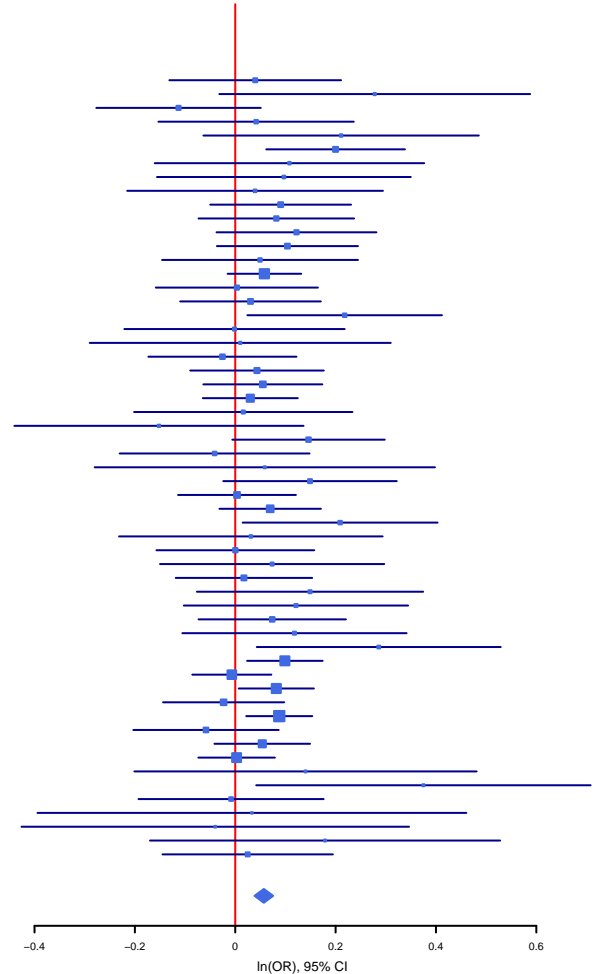

rs113779084

G/A

7:11871787

het\_P:

0.0187

het\_I:

30.2

|                  | ngt      | info        | p_value         | f_ca(n)             | f_co(n)              | ln(OR)         | STDerr        |
|------------------|----------|-------------|-----------------|---------------------|----------------------|----------------|---------------|
| bmau.            | 0        | 0.97        | 0.593           | 0.679(329)          | 0.688(1810)          | -0.0495        | 0.0927        |
| bm2g.            | 0        | 1.01        | 0.639           | 0.666(181)          | 0.679(478)           | -0.0792        | 0.169         |
| bm3g.            | 0        | 0.96        | 0.519           | 0.682(489)          | 0.699(880)           | -0.0581        | 0.0899        |
| bmpo.            | 0        | 0.98        | 0.0396          | 0.603(410)          | 0.628(689)           | -0.206         | 0.0999        |
| bmsp.            | 0        | 0.99        | 0.0231          | 0.680(253)          | 0.726(291)           | -0.346         | 0.152         |
| bonn.            | 0        | 1.03        | 0.0256          | 0.658(669)          | 0.691(1246)          | -0.164         | 0.0733        |
| butr.            | 0        | 0.99        | 0.191           | 0.659(236)          | 0.699(236)           | -0.184         | 0.141         |
| dub1.            | 0        | 0.97        | 0.655           | 0.675(150)          | 0.675(150)           | -0.0982        | 0.136         |
| edf1.            | 0        | 0.95        | 0.835           | 0.719(275)          | 0.717(272)           | 0.0302         | 0.145         |
| fat2.            | 0        | 0.96        | 0.381           | 0.705(722)          | 0.689(1027)          | 0.0683         | 0.078         |
| fran.            | 0        | 0.99        | 0.00411         | 0.656(451)          | 0.700(1630)          | -0.235         | 0.0818        |
| gain.            | 0        | 0.95        | 0.662           | 0.693(706)          | 0.698(593)           | -0.0387        | 0.0884        |
| gsk1.            | 0        | 1.03        | 0.00441         | 0.673(706)          | 0.719(899)           | -0.219         | 0.0769        |
| hal2.            | 0        | 0.95        | 0.41            | 0.663(410)          | 0.681(479)           | -0.0889        | 0.108         |
| icuk.            | 0        | 0.95        | 0.000363        | 0.690(2456)         | 0.708(4069)          | -0.144         | 0.0406        |
| js15.            | 0        | 1.04        | 0.743           | 0.716(646)          | 0.713(643)           | 0.0293         | 0.0864        |
| may1.            | 0        | 1.01        | 0.684           | 0.696(929)          | 0.696(759)           | 0.0314         | 0.0772        |
| mich.            | 0        | 0.94        | 0.568           | 0.683(481)          | 0.698(399)           | -0.0622        | 0.109         |
| pf1e.            | 0        | 0.99        | 0.501           | 0.719(375)          | 0.687(346)           | 0.0805         | 0.12          |
| rom3.            | 0        | 0.97        | 0.384           | 0.648(233)          | 0.685(198)           | -0.134         | 0.154         |
| st2c.            | 0        | 0.94        | 0.58            | 0.702(628)          | 0.702(1219)          | -0.0454        | 0.0819        |
| stp1.            | 0        | 0.95        | 0.222           | 0.686(920)          | 0.663(973)           | 0.0885         | 0.0724        |
| swa2.            | 0        | 0.98        | 0.814           | 0.692(851)          | 0.698(2252)          | -0.156         | 0.0635        |
| swei.            | 0        | 0.98        | 0.598           | 0.677(1278)         | 0.685(3669)          | -0.0268        | 0.0507        |
| top7.            | 0        | 0.95        | 0.895           | 0.744(416)          | 0.735(350)           | -0.0168        | 0.128         |
| top8.            | 0        | 1.01        | 0.975           | 0.744(148)          | 0.741(291)           | -0.00521       | 0.168         |
| ucl2.            | 0        | 0.99        | 0.229           | 0.679(726)          | 0.700(693)           | -0.099         | 0.0823        |
| ucio.            | 0        | 0.96        | 0.0992          | 0.689(427)          | 0.720(488)           | -0.177         | 0.107         |
| uktr.            | 0        | 0.99        | 0.235           | 0.666(130)          | 0.714(130)           | -0.228         | 0.192         |
| umr4.            | 0        | 0.99        | 0.919           | 0.702(565)          | 0.704(569)           | -0.00944       | 0.0929        |
| usc2.            | 0        | 0.97        | 0.618           | 0.715(1293)         | 0.702(1156)          | 0.0329         | 0.066         |
| wlcc.            | 0        | 0.99        | 0.0649          | 0.681(1644)         | 0.700(1641)          | -0.101         | 0.055         |
| jea2.            | 0        | 1.00        | 4.34e-05        | 0.540(372)          | 0.628(628)           | -0.398         | 0.0973        |
| kfo4.            | 0        | 0.97        | 0.57            | 0.678(247)          | 0.703(288)           | -0.0823        | 0.145         |
| tgco2.           | 0        | 1.02        | 0.685           | 0.686(1032)         | 0.699(499)           | -0.0341        | 0.0839        |
| bdtrs.           | 0        | 1.02        | 0.798           | 0.677(218)          | 0.689(684)           | -0.0305        | 0.119         |
| dutch.           | 0        | 0.98        | 0.0636          | 0.680(831)          | 0.712(953)           | -0.138         | 0.0746        |
| gaw1.            | 0        | 0.94        | 0.865           | 0.697(268)          | 0.692(502)           | 0.0209         | 0.122         |
| germ1.           | 0        | 1.00        | 0.395           | 0.706(219)          | 0.688(992)           | 0.101          | 0.119         |
| gpcw1.           | 0        | 0.97        | 0.725           | 0.709(447)          | 0.715(2092)          | -0.0292        | 0.0829        |
| neuc1.           | 0        | 0.93        | 0.243           | 0.671(215)          | 0.697(750)           | -0.145         | 0.125         |
| spsp3.           | 0        | 0.91        | 0.0538          | 0.665(153)          | 0.714(2337)          | -0.255         | 0.132         |
| swed1.           | 0        | 0.98        | 0.557           | 0.683(2909)         | 0.693(2844)          | -0.0242        | 0.0413        |
| ukwa1.           | 0        | 0.97        | 1.5e-06         | 0.681(2789)         | 0.724(2372)          | -0.214         | 0.0445        |
| usa4.            | 0        | 0.94        | 0.0954          | 0.695(268)          | 0.712(2930)          | -0.0701        | 0.042         |
| usa5.            | 0        | 0.95        | 0.215           | 0.692(1107)         | 0.715(1316)          | -0.0836        | 0.0674        |
| deCODE.          | 0        | 1.00        | 0.0455          | 0.702(1972)         | 0.702(192602)        | -0.0723        | 0.0362        |
| EstonianBiobank. | 1        | 0.98        | 0.417           | 0.635(407)          | 0.619(17209)         | 0.0604         | 0.0745        |
| HUNT.            | 0        | 0.98        | 0.689           | 0.731(905)          | 0.727(41914)         | 0.0218         | 0.0545        |
| iPSYCH.          | 0        | 0.94        | 0.321           | 0.688(1758)         | 0.697(5937)          | -0.0426        | 0.043         |
| UKBiobank.       | 0        | 1.00        | 0.273           | 0.692(1454)         | 0.703(58113)         | -0.183         | 0.166         |
| bmron.           | 0        | 1.03        | 0.182           | 0.654(251)          | 0.654(251)           | -0.212         | 0.174         |
| bmrus.           | 0        | 0.99        | 0.82            | 0.630(522)          | 0.630(460)           | -0.0218        | 0.096         |
| graza.           | 0        | 0.92        | 0.391           | 0.666(144)          | 0.633(66)            | 0.203          | 0.236         |
| greek.           | 0        | 1.03        | 0.78            | 0.693(186)          | 0.702(87)            | -0.0555        | 0.199         |
| norgs.           | 0        | 0.96        | 0.581           | 0.732(101)          | 0.723(315)           | 0.108          | 0.196         |
| noroe.           | 0        | 0.99        | 0.0821          | 0.695(313)          | 0.729(4367)          | -0.163         | 0.0938        |
|                  | <b>1</b> | <b>0.98</b> | <b>1.42e-13</b> | <b>0.686(41917)</b> | <b>0.701(371549)</b> | <b>-0.0755</b> | <b>0.0102</b> |

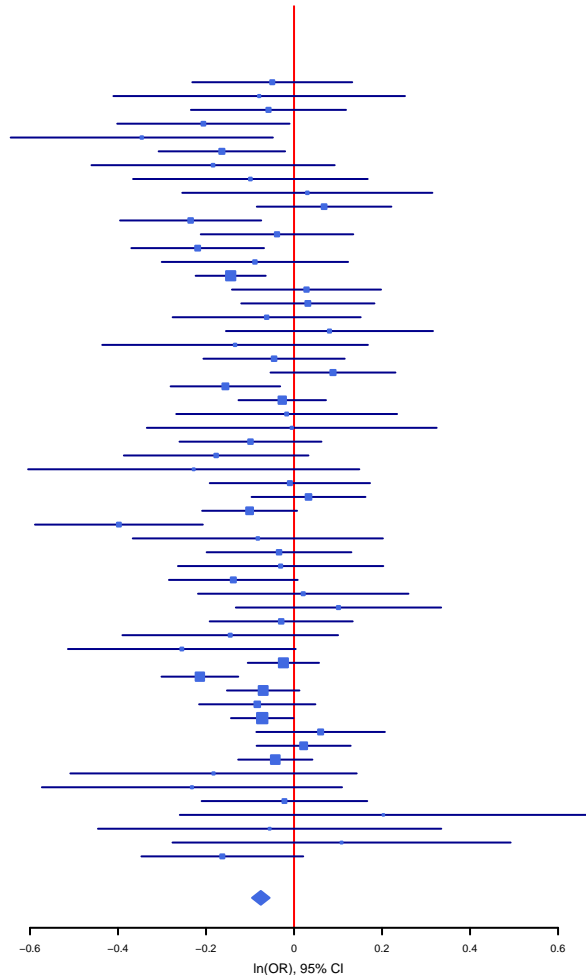

rs6954854

G/A

7:21492589

het\_P: 0.734

het\_I: 0.0

|                  | ngt | info | p_value | f_ca(n)     | f_co(n)       | ln(OR)   | STDerr |
|------------------|-----|------|---------|-------------|---------------|----------|--------|
| bmau.            | 0   | 1.02 | 0.594   | 0.430(329)  | 0.420(1810)   | 0.0454   | 0.0851 |
| bm2.             | 0   | 1.00 | 0.222   | 0.461(181)  | 0.428(478)    | 0.191    | 0.156  |
| bm3.             | 0   | 0.95 | 0.0988  | 0.454(489)  | 0.418(880)    | 0.14     | 0.0848 |
| bmpo.            | 0   | 0.97 | 0.766   | 0.430(410)  | 0.431(689)    | 0.0293   | 0.0982 |
| bmsp.            | 0   | 0.91 | 0.984   | 0.416(253)  | 0.415(291)    | 0.003    | 0.147  |
| bonn.            | 0   | 0.97 | 0.174   | 0.439(669)  | 0.422(1246)   | 0.097    | 0.0713 |
| butr.            | 0   | 0.95 | 0.659   | 0.434(236)  | 0.420(236)    | 0.0597   | 0.135  |
| dub1.            | 0   | 0.99 | 0.075   | 0.411(150)  | 0.417(796)    | -0.00401 | 0.23   |
| edf1.            | 0   | 0.90 | 0.697   | 0.426(275)  | 0.437(272)    | -0.0526  | 0.135  |
| fat2.            | 0   | 0.94 | 0.0567  | 0.441(722)  | 0.410(1027)   | 0.139    | 0.0728 |
| fran.            | 0   | 1.02 | 0.494   | 0.435(451)  | 0.421(1630)   | 0.0521   | 0.0763 |
| gain.            | 0   | 1.00 | 0.17    | 0.446(706)  | 0.422(593)    | 0.11     | 0.0803 |
| gsk1.            | 0   | 1.00 | 0.127   | 0.446(706)  | 0.417(899)    | 0.11     | 0.0722 |
| hai2.            | 0   | 1.00 | 0.794   | 0.419(410)  | 0.412(479)    | 0.0262   | 0.101  |
| icuk.            | 0   | 1.01 | 0.0049  | 0.444(2456) | 0.419(4069)   | 0.103    | 0.0368 |
| jsf5.            | 0   | 1.02 | 0.261   | 0.444(646)  | 0.419(643)    | 0.0894   | 0.0796 |
| may1.            | 0   | 1.01 | 0.876   | 0.431(929)  | 0.426(759)    | 0.0111   | 0.0715 |
| mich.            | 0   | 0.99 | 0.44    | 0.447(481)  | 0.436(399)    | 0.076    | 0.0985 |
| pf1e.            | 0   | 1.04 | 0.109   | 0.429(375)  | 0.387(346)    | 0.174    | 0.108  |
| rom3.            | 0   | 1.02 | 0.618   | 0.431(233)  | 0.414(198)    | 0.0716   | 0.144  |
| st2c.            | 0   | 1.00 | 0.0261  | 0.448(628)  | 0.409(1219)   | 0.164    | 0.0738 |
| stp1.            | 0   | 0.98 | 0.321   | 0.422(920)  | 0.438(973)    | -0.0669  | 0.0673 |
| swa2.            | 0   | 1.00 | 0.748   | 0.428(865)  | 0.437(2252)   | -0.0327  | 0.0591 |
| swei.            | 0   | 1.02 | 0.44    | 0.448(1278) | 0.439(3669)   | 0.036    | 0.0467 |
| top7.            | 0   | 0.99 | 0.52    | 0.436(416)  | 0.420(350)    | 0.0706   | 0.11   |
| top8.            | 0   | 1.01 | 0.323   | 0.432(148)  | 0.412(291)    | 0.148    | 0.15   |
| ucl2.            | 0   | 1.00 | 0.705   | 0.421(726)  | 0.414(693)    | 0.029    | 0.0766 |
| ucio.            | 0   | 0.98 | 0.31    | 0.447(427)  | 0.428(488)    | 0.0986   | 0.097  |
| uktr.            | 0   | 0.98 | 0.076   | 0.477(130)  | 0.400(130)    | 0.32     | 0.18   |
| umr4.            | 0   | 1.07 | 0.603   | 0.431(565)  | 0.444(569)    | -0.0429  | 0.0825 |
| usc2.            | 0   | 1.01 | 0.636   | 0.427(1293) | 0.435(1156)   | -0.0279  | 0.0591 |
| wlcc.            | 0   | 0.98 | 0.82    | 0.431(1644) | 0.426(1641)   | 0.0117   | 0.0516 |
| jea2.            | 0   | 1.03 | 0.143   | 0.451(372)  | 0.420(628)    | 0.138    | 0.0943 |
| kfo4.            | 0   | 0.93 | 0.615   | 0.434(247)  | 0.445(288)    | -0.0689  | 0.137  |
| tgco2.           | 0   | 0.93 | 0.0145  | 0.452(1032) | 0.404(499)    | 0.2      | 0.0821 |
| bdrs.            | 0   | 1.01 | 0.833   | 0.438(218)  | 0.426(684)    | 0.0237   | 0.112  |
| dutch.           | 0   | 0.97 | 0.353   | 0.441(831)  | 0.426(953)    | 0.0645   | 0.0695 |
| gaw1.            | 0   | 1.07 | 0.155   | 0.397(268)  | 0.434(502)    | -0.1353  | 0.138  |
| germ1.           | 0   | 1.05 | 0.508   | 0.394(219)  | 0.416(992)    | -0.0719  | 0.109  |
| gpcw1.           | 0   | 1.00 | 0.666   | 0.414(447)  | 0.418(2092)   | -0.0324  | 0.0751 |
| neuc1.           | 0   | 0.97 | 0.121   | 0.456(215)  | 0.416(750)    | 0.176    | 0.113  |
| spsp3.           | 0   | 1.01 | 0.528   | 0.418(153)  | 0.402(2337)   | 0.0759   | 0.12   |
| swed1.           | 0   | 0.99 | 0.0911  | 0.441(2909) | 0.428(2844)   | 0.0648   | 0.0383 |
| ukwa1.           | 0   | 1.02 | 0.037   | 0.446(2789) | 0.425(2372)   | 0.0837   | 0.0398 |
| usa4.            | 0   | 0.99 | 0.0679  | 0.432(2956) | 0.418(2930)   | 0.0526   | 0.0377 |
| usa5.            | 0   | 1.02 | 0.53    | 0.430(1107) | 0.428(1316)   | -0.0379  | 0.0604 |
| deCODE.          | 0   | 1.00 | 0.0539  | 0.429(1972) | 0.429(192602) | 0.0649   | 0.0336 |
| EstonianBiobank. | 1   | 0.99 | 0.873   | 0.439(407)  | 0.443(17209)  | -0.0115  | 0.0721 |
| HUNT.            | 0   | 1.00 | 0.00396 | 0.452(905)  | 0.416(41914)  | 0.141    | 0.0488 |
| iPSYCH.          | 0   | 0.97 | 0.545   | 0.420(1758) | 0.414(5937)   | 0.024    | 0.0396 |
| UKBiobank.       | 0   | 1.00 | 0.734   | 0.421(1454) | 0.418(58113)  | 0.0581   | 0.171  |
| bmron.           | 0   | 0.95 | 0.0679  | 0.485(225)  | 0.410(121)    | 0.312    | 0.17   |
| bmrus.           | 0   | 1.00 | 0.269   | 0.432(522)  | 0.405(460)    | 0.104    | 0.0937 |
| graza.           | 0   | 1.05 | 0.887   | 0.504(144)  | 0.515(66)     | -0.0298  | 0.21   |
| greek.           | 0   | 0.90 | 0.765   | 0.416(186)  | 0.422(87)     | -0.0594  | 0.199  |
| norgs.           | 0   | 0.99 | 0.466   | 0.426(101)  | 0.423(315)    | 0.131    | 0.179  |
| noroe.           | 0   | 1.02 | 0.0331  | 0.441(313)  | 0.409(4367)   | 0.182    | 0.0855 |

1 1.00 5.94e-10 0.436(41917) 0.425(371549) 0.0583 0.0094

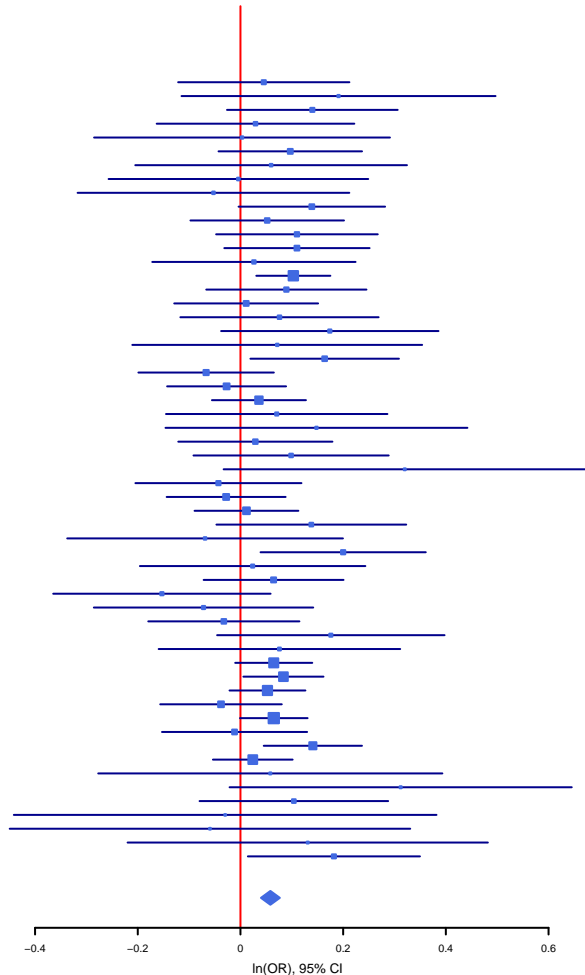



rs12672003 A/G

7:24647222

het\_P:

0.481

het\_I:

0.0

|            | ngt         | info            | p_value             | f_ca(n)              | f_co(n)       | ln(OR)        | STDerr |
|------------|-------------|-----------------|---------------------|----------------------|---------------|---------------|--------|
| bmau.      | 0           | 1.03            | 0.118               | 0.857(329)           | 0.880(1810)   | -0.19         | 0.122  |
| bmg2.      | 0           | 0.96            | 0.53                | 0.910(181)           | 0.892(478)    | 0.163         | 0.26   |
| bmg3.      | 0           | 1.05            | 0.862               | 0.898(489)           | 0.898(860)    | -0.0228       | 0.131  |
| bmpo.      | 0           | 0.96            | 0.247               | 0.896(410)           | 0.907(689)    | -0.187        | 0.162  |
| bmsp.      | 0           | 0.99            | 0.867               | 0.922(253)           | 0.937(291)    | -0.0444       | 0.265  |
| bonn.      | 0           | 0.96            | 0.543               | 0.896(669)           | 0.899(1246)   | -0.0714       | 0.117  |
| butr.      | 0           | 0.98            | 0.863               | 0.924(236)           | 0.927(236)    | -0.0432       | 0.25   |
| dub1.      | 0           | 1.07            | 0.998               | 0.842(150)           | 0.846(796)    | 0.0005        | 0.171  |
| edl1.      | 0           | 1.06            | 0.748               | 0.881(275)           | 0.868(272)    | 0.0594        | 0.185  |
| fat2.      | 0           | 1.02            | 0.477               | 0.885(722)           | 0.887(1027)   | -0.0774       | 0.109  |
| fran.      | 0           | 1.02            | 0.0952              | 0.889(451)           | 0.901(1630)   | -0.204        | 0.122  |
| gain.      | 0           | 0.97            | 0.616               | 0.895(706)           | 0.888(593)    | 0.065         | 0.13   |
| gsk1.      | 0           | 1.00            | 0.022               | 0.861(706)           | 0.888(899)    | -0.251        | 0.109  |
| hal2.      | 0           | 0.97            | 0.381               | 0.887(410)           | 0.907(479)    | -0.145        | 0.166  |
| icuk.      | 0           | 0.98            | 0.00432             | 0.871(2456)          | 0.889(4069)   | -0.162        | 0.0566 |
| jst5.      | 0           | 1.01            | 0.615               | 0.883(646)           | 0.888(643)    | -0.0629       | 0.125  |
| may1.      | 0           | 1.02            | 0.019               | 0.864(929)           | 0.895(759)    | -0.258        | 0.11   |
| mich.      | 0           | 0.95            | 0.761               | 0.878(481)           | 0.878(399)    | 0.0462        | 0.152  |
| pf1e.      | 0           | 1.01            | 0.277               | 0.877(375)           | 0.894(346)    | -0.187        | 0.172  |
| rom3.      | 0           | 1.02            | 0.394               | 0.902(233)           | 0.910(198)    | -0.211        | 0.247  |
| st2c.      | 0           | 1.00            | 0.333               | 0.890(628)           | 0.900(1219)   | -0.114        | 0.117  |
| stp1.      | 0           | 1.02            | 0.0412              | 0.865(920)           | 0.894(973)    | -0.208        | 0.102  |
| swa2.      | 0           | 0.99            | 0.00418             | 0.871(885)           | 0.897(2252)   | -0.262        | 0.0914 |
| swel.      | 0           | 1.03            | 0.165               | 0.882(1278)          | 0.890(3669)   | -0.0997       | 0.0718 |
| top7.      | 0           | 1.04            | 0.212               | 0.869(416)           | 0.896(350)    | -0.205        | 0.164  |
| top8.      | 0           | 1.09            | 0.0956              | 0.902(148)           | 0.862(291)    | 0.38          | 0.228  |
| uc12.      | 0           | 0.97            | 0.0634              | 0.914(726)           | 0.896(693)    | 0.244         | 0.132  |
| uclo.      | 0           | 1.02            | 0.952               | 0.869(427)           | 0.871(488)    | 0.00846       | 0.14   |
| uktr.      | 0           | 0.98            | 0.973               | 0.887(130)           | 0.886(130)    | 0.00965       | 0.28   |
| ume4.      | 0           | 1.00            | 0.451               | 0.865(565)           | 0.877(569)    | -0.0953       | 0.126  |
| usc2.      | 0           | 0.99            | 0.486               | 0.898(1293)          | 0.904(1156)   | -0.069        | 0.0992 |
| wicc.      | 0           | 1.02            | 0.444               | 0.873(1644)          | 0.886(1641)   | -0.0594       | 0.0776 |
| jes2.      | 0           | 1.00            | 0.103               | 0.884(372)           | 0.915(628)    | -0.26         | 0.159  |
| kfo4.      | 0           | 0.95            | 0.0714              | 0.883(247)           | 0.914(288)    | -0.404        | 0.224  |
| tgco2.     | 0           | 1.01            | 0.628               | 0.878(1032)          | 0.874(499)    | 0.0572        | 0.118  |
| bdtrs.     | 0           | 0.97            | 0.628               | 0.881(218)           | 0.892(684)    | -0.0863       | 0.178  |
| dutch.     | 0           | 0.98            | 0.0327              | 0.885(831)           | 0.907(953)    | -0.24         | 0.113  |
| gawli.     | 0           | 1.00            | 0.387               | 0.890(268)           | 0.898(502)    | -0.154        | 0.177  |
| germ1.     | 0           | 0.97            | 0.663               | 0.896(219)           | 0.900(932)    | -0.08         | 0.184  |
| gpcw1.     | 0           | 0.98            | 0.38                | 0.884(447)           | 0.894(2092)   | -0.0918       | 0.118  |
| neuc1.     | 0           | 1.02            | 0.929               | 0.880(215)           | 0.880(750)    | 0.0151        | 0.17   |
| ssp3.      | 0           | 1.01            | 0.765               | 0.920(153)           | 0.916(2337)   | 0.0659        | 0.22   |
| swed1.     | 0           | 1.00            | 0.991               | 0.891(2909)          | 0.890(2844)   | 0.0007        | 0.0605 |
| ukwa1.     | 0           | 0.99            | 0.662               | 0.875(2789)          | 0.880(2372)   | -0.0268       | 0.0612 |
| usaw4.     | 0           | 0.98            | 0.00353             | 0.886(2956)          | 0.903(2930)   | -0.18         | 0.0616 |
| usaw5.     | 0           | 1.02            | 0.182               | 0.877(1107)          | 0.890(1316)   | -0.126        | 0.0943 |
| HUNT1.     | 0           | 1.00            | 0.759               | 0.879(905)           | 0.881(41914)  | -0.022        | 0.0746 |
| IPSYCH1.   | 0           | 0.99            | 0.3                 | 0.889(1758)          | 0.895(5937)   | -0.0642       | 0.0619 |
| UKBiobank. | 0           | 1.00            | 0.00949             | 0.869(1454)          | 0.886(58113)  | -0.387        | 0.149  |
| bmrom.     | 0           | 0.95            | 0.973               | 0.923(225)           | 0.926(121)    | 0.0108        | 0.317  |
| bmrus.     | 0           | 0.95            | 0.287               | 0.905(522)           | 0.889(460)    | 0.164         | 0.154  |
| graza.     | 0           | 1.04            | 0.658               | 0.880(144)           | 0.894(66)     | -0.15         | 0.339  |
| norgs.     | 0           | 0.99            | 0.319               | 0.914(101)           | 0.879(315)    | 0.295         | 0.296  |
| noroe.     | 0           | 0.98            | 0.786               | 0.881(313)           | 0.877(4367)   | -0.0356       | 0.131  |
| <b>0</b>   | <b>1.00</b> | <b>2.72e-09</b> | <b>0.883(41917)</b> | <b>0.887(371549)</b> | <b>-0.092</b> | <b>0.0155</b> |        |

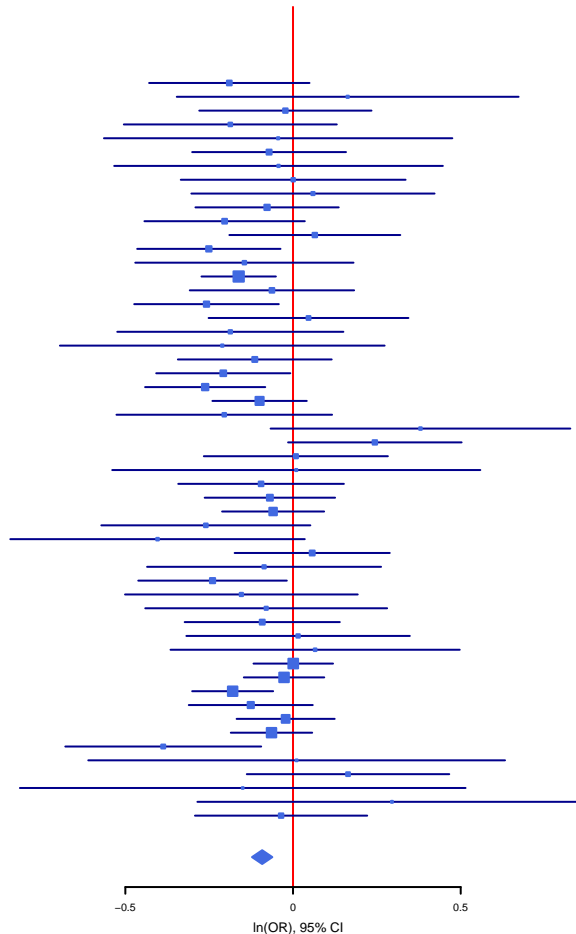

rs11764361

A/G

7:105043229

het\_P:

0.566

het\_I:

0.0

|                  | ngt      | info        | p_value         | f_ca(n)             | f_co(n)              | ln(OR)        | STDerr        |
|------------------|----------|-------------|-----------------|---------------------|----------------------|---------------|---------------|
| bmau.            | 0        | 0.86        | 0.137           | 0.693(329)          | 0.665(1810)          | 0.148         | 0.0993        |
| bm2g.            | 0        | 0.85        | 0.296           | 0.700(181)          | 0.650(478)           | 0.189         | 0.181         |
| bm3.             | 0        | 0.85        | 0.146           | 0.681(489)          | 0.659(880)           | 0.137         | 0.0943        |
| bmpo.            | 0        | 0.83        | 0.00725         | 0.668(410)          | 0.622(689)           | 0.297         | 0.111         |
| bmsp.            | 0        | 0.79        | 0.802           | 0.706(253)          | 0.706(291)           | 0.042         | 0.168         |
| bonn.            | 0        | 0.85        | 0.108           | 0.699(669)          | 0.666(1246)          | 0.131         | 0.0814        |
| butr.            | 0        | 0.87        | 0.646           | 0.691(236)          | 0.704(236)           | -0.0664       | 0.144         |
| dub1.            | 0        | 0.87        | 0.656           | 0.645(150)          | 0.639(796)           | 0.141         | 0.0772        |
| edf1.            | 0        | 0.80        | 0.836           | 0.678(275)          | 0.682(272)           | 0.0315        | 0.152         |
| fat2.            | 0        | 0.79        | 0.87            | 0.676(722)          | 0.673(1027)          | 0.0138        | 0.084         |
| fran.            | 0        | 0.79        | 0.639           | 0.694(451)          | 0.684(1630)          | 0.0436        | 0.093         |
| gain.            | 0        | 0.83        | 0.31            | 0.649(706)          | 0.664(593)           | -0.0931       | 0.0918        |
| gsk1.            | 0        | 0.93        | 0.489           | 0.660(706)          | 0.671(899)           | -0.0544       | 0.0785        |
| hal2.            | 0        | 0.86        | 0.838           | 0.665(410)          | 0.677(479)           | -0.0232       | 0.114         |
| icuk.            | 0        | 0.88        | 0.322           | 0.675(2456)         | 0.667(4069)          | 0.0411        | 0.0415        |
| js15.            | 0        | 0.90        | 0.429           | 0.653(846)          | 0.637(843)           | 0.0692        | 0.0878        |
| may1.            | 0        | 0.86        | 0.534           | 0.685(929)          | 0.675(759)           | 0.0513        | 0.0824        |
| mich.            | 0        | 0.88        | 0.169           | 0.655(481)          | 0.624(399)           | 0.147         | 0.107         |
| pf1e.            | 0        | 0.83        | 0.17            | 0.671(375)          | 0.642(346)           | 0.172         | 0.125         |
| rom3.            | 0        | 0.84        | 0.0544          | 0.699(233)          | 0.638(198)           | 0.325         | 0.169         |
| st2c.            | 0        | 0.84        | 0.0445          | 0.678(628)          | 0.657(1219)          | 0.17          | 0.0845        |
| stp1.            | 0        | 0.83        | 0.662           | 0.672(920)          | 0.668(973)           | 0.0316        | 0.0772        |
| swa2.            | 0        | 0.87        | 0.0619          | 0.688(865)          | 0.646(2252)          | 0.2307        | 0.0676        |
| swei.            | 0        | 0.92        | 0.221           | 0.664(1278)         | 0.653(3669)          | 0.0633        | 0.0517        |
| top7.            | 0        | 0.88        | 0.157           | 0.672(416)          | 0.632(350)           | 0.172         | 0.122         |
| top8.            | 0        | 0.94        | 0.123           | 0.698(148)          | 0.653(291)           | 0.254         | 0.164         |
| ucl2.            | 0        | 0.88        | 0.0632          | 0.697(726)          | 0.667(693)           | 0.162         | 0.0871        |
| uclo.            | 0        | 0.80        | 0.85            | 0.675(427)          | 0.668(488)           | 0.0214        | 0.113         |
| uktr.            | 0        | 1.01        | 0.634           | 0.702(130)          | 0.682(130)           | 0.0903        | 0.19          |
| umr4.            | 0        | 0.93        | 0.459           | 0.609(565)          | 0.593(569)           | 0.0663        | 0.0896        |
| usc2.            | 0        | 0.89        | 0.251           | 0.663(1293)         | 0.671(1156)          | -0.0758       | 0.0661        |
| wlcc.            | 0        | 0.87        | 0.909           | 0.661(1644)         | 0.670(1641)          | -0.00652      | 0.0575        |
| jea2.            | 0        | 0.84        | 0.58            | 0.620(372)          | 0.633(628)           | -0.059        | 0.107         |
| kfo4.            | 0        | 0.98        | 0.56            | 0.674(247)          | 0.664(288)           | 0.0826        | 0.142         |
| tgco2.           | 0        | 0.84        | 0.397           | 0.665(1032)         | 0.653(499)           | 0.076         | 0.0898        |
| bdrs.            | 0        | 0.91        | 0.519           | 0.662(218)          | 0.670(684)           | -0.0801       | 0.124         |
| dutch.           | 0        | 0.92        | 0.121           | 0.697(831)          | 0.675(953)           | 0.118         | 0.0764        |
| gawil.           | 0        | 0.90        | 0.791           | 0.680(268)          | 0.680(268)           | 0.0329        | 0.124         |
| germ1.           | 0        | 0.91        | 0.841           | 0.681(219)          | 0.668(992)           | 0.0243        | 0.121         |
| gpcw1.           | 0        | 0.93        | 0.227           | 0.682(447)          | 0.664(2092)          | 0.0994        | 0.0822        |
| neuc1.           | 0        | 0.93        | 0.688           | 0.681(215)          | 0.666(750)           | 0.0496        | 0.123         |
| spsp3.           | 0        | 0.89        | 0.985           | 0.699(153)          | 0.699(2337)          | -0.0027       | 0.138         |
| swed1.           | 0        | 0.93        | 0.0485          | 0.664(2909)         | 0.646(2844)          | 0.0811        | 0.0411        |
| ukwa1.           | 0        | 0.95        | 0.227           | 0.670(2789)         | 0.661(2372)          | 0.0525        | 0.0434        |
| usa6.            | 0        | 0.91        | 0.212           | 0.675(256)          | 0.660(2930)          | 0.0842        | 0.142         |
| usaw5.           | 0        | 0.91        | 0.00365         | 0.677(1107)         | 0.644(1316)          | 0.194         | 0.0668        |
| deCODE.          | 0        | 1.00        | 0.384           | 0.679(1972)         | 0.679(192602)        | 0.0315        | 0.0362        |
| EstonianBiobank. | 1        | 0.96        | 0.382           | 0.641(407)          | 0.627(17209)         | 0.066         | 0.0755        |
| HUNT.            | 0        | 0.94        | 0.758           | 0.656(905)          | 0.659(41914)         | -0.0162       | 0.0525        |
| iPSYCH.          | 0        | 0.88        | 0.879           | 0.664(1758)         | 0.666(5937)          | -0.00662      | 0.0433        |
| UKBiobank.       | 0        | 1.00        | 0.347           | 0.664(1454)         | 0.658(58113)         | 0.166         | 0.177         |
| bmron.           | 0        | 0.89        | 0.289           | 0.674(251)          | 0.639(121)           | 0.207         | 0.183         |
| bmrus.           | 0        | 0.91        | 0.0152          | 0.660(522)          | 0.606(460)           | 0.245         | 0.101         |
| graza.           | 0        | 0.88        | 0.985           | 0.670(144)          | 0.668(66)            | -0.00471      | 0.241         |
| greek.           | 0        | 0.92        | 0.12            | 0.733(186)          | 0.672(87)            | 0.332         | 0.213         |
| norgs.           | 0        | 0.86        | 0.945           | 0.662(101)          | 0.633(315)           | 0.0136        | 0.197         |
| noroe.           | 0        | 0.91        | 0.441           | 0.669(313)          | 0.650(4367)          | 0.0733        | 0.0951        |
|                  | <b>1</b> | <b>0.91</b> | <b>3.47e-09</b> | <b>0.671(41917)</b> | <b>0.668(371549)</b> | <b>0.0615</b> | <b>0.0104</b> |

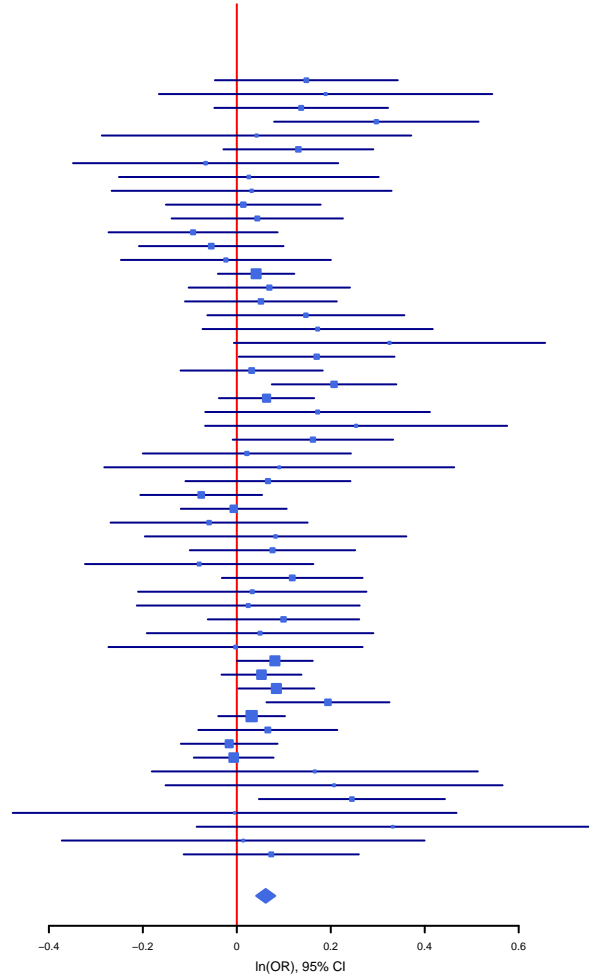

rs6946056

A/C

7:131870597

het\_P:

0.00928

het\_I:

33.3

|                  | ngt | info | p_value  | f_ca(n)     | f_co(n)       | ln(OR)   | STDerr |
|------------------|-----|------|----------|-------------|---------------|----------|--------|
| bmau.            | 0   | 0.99 | 0.227    | 0.422(329)  | 0.402(1810)   | 0.106    | 0.0875 |
| bm2g.            | 0   | 0.94 | 0.0926   | 0.362(181)  | 0.443(478)    | -0.277   | 0.165  |
| bm3g.            | 0   | 0.98 | 0.118    | 0.377(489)  | 0.411(880)    | -0.133   | 0.0848 |
| bmpo.            | 0   | 0.97 | 0.0332   | 0.359(410)  | 0.403(689)    | -0.214   | 0.1    |
| bmsp.            | 0   | 1.00 | 0.312    | 0.344(253)  | 0.377(291)    | -0.145   | 0.144  |
| bonn.            | 0   | 1.01 | 0.0936   | 0.396(669)  | 0.373(1246)   | 0.12     | 0.0714 |
| butr.            | 0   | 0.96 | 0.642    | 0.417(236)  | 0.403(236)    | 0.0628   | 0.135  |
| dub1.            | 0   | 0.92 | 0.766    | 0.430(150)  | 0.430(796)    | 0.088    | 0.15   |
| edf1.            | 0   | 0.84 | 0.445    | 0.425(275)  | 0.396(272)    | 0.108    | 0.141  |
| fat2.            | 0   | 0.97 | 0.804    | 0.393(722)  | 0.402(1027)   | -0.018   | 0.0726 |
| fran.            | 0   | 1.01 | 0.141    | 0.367(451)  | 0.394(1630)   | -0.116   | 0.0789 |
| gain.            | 0   | 0.95 | 0.447    | 0.398(706)  | 0.413(593)    | -0.0628  | 0.0826 |
| gsk1.            | 0   | 1.02 | 0.535    | 0.393(706)  | 0.383(899)    | 0.0453   | 0.0729 |
| hai2.            | 0   | 0.96 | 0.44     | 0.382(410)  | 0.391(479)    | -0.0802  | 0.104  |
| icuk.            | 0   | 1.02 | 0.0348   | 0.385(2456) | 0.407(4069)   | -0.0785  | 0.0572 |
| jsf5.            | 0   | 0.97 | 0.266    | 0.401(646)  | 0.426(643)    | -0.0911  | 0.082  |
| may1.            | 0   | 1.02 | 0.181    | 0.411(929)  | 0.387(759)    | 0.0967   | 0.0723 |
| mich.            | 0   | 0.97 | 0.00102  | 0.354(481)  | 0.433(399)    | -0.335   | 0.102  |
| pf1e.            | 0   | 1.06 | 0.411    | 0.419(375)  | 0.397(346)    | 0.089    | 0.108  |
| rom3.            | 0   | 1.03 | 0.0326   | 0.355(233)  | 0.431(198)    | -0.312   | 0.146  |
| st2c.            | 0   | 0.77 | 0.382    | 0.381(628)  | 0.394(1219)   | -0.0739  | 0.0844 |
| stp1.            | 0   | 0.83 | 0.266    | 0.397(920)  | 0.409(973)    | -0.0823  | 0.074  |
| swa2.            | 0   | 0.97 | 0.766    | 0.381(865)  | 0.383(2252)   | 0.0186   | 0.0613 |
| swei.            | 0   | 1.02 | 0.118    | 0.363(1278) | 0.380(3669)   | -0.0753  | 0.0481 |
| top7.            | 0   | 1.01 | 0.122    | 0.361(416)  | 0.387(350)    | -0.174   | 0.112  |
| top8.            | 0   | 0.95 | 0.598    | 0.378(148)  | 0.373(291)    | 0.0819   | 0.155  |
| ucl2.            | 0   | 0.98 | 0.794    | 0.403(726)  | 0.409(693)    | -0.0203  | 0.0779 |
| uclo.            | 0   | 0.79 | 0.338    | 0.387(427)  | 0.412(488)    | -0.105   | 0.109  |
| uktr.            | 0   | 0.94 | 0.7      | 0.369(130)  | 0.385(130)    | -0.0722  | 0.187  |
| umr4.            | 0   | 0.97 | 0.916    | 0.376(565)  | 0.390(569)    | -0.06944 | 0.089  |
| usc2.            | 0   | 0.96 | 0.925    | 0.371(1293) | 0.372(1156)   | 0.00588  | 0.0622 |
| wlcc.            | 0   | 0.91 | 1.46e-05 | 0.371(1644) | 0.416(1641)   | -0.236   | 0.0545 |
| jea2.            | 0   | 1.03 | 0.183    | 0.374(372)  | 0.405(628)    | -0.127   | 0.0951 |
| kfo4.            | 0   | 1.02 | 0.177    | 0.419(247)  | 0.390(288)    | 0.178    | 0.132  |
| tgco2.           | 0   | 0.92 | 0.771    | 0.396(1032) | 0.387(499)    | 0.0242   | 0.0833 |
| bdrs.            | 0   | 0.96 | 0.327    | 0.372(218)  | 0.397(684)    | -0.115   | 0.117  |
| dutch.           | 0   | 0.98 | 0.82     | 0.374(831)  | 0.377(953)    | -0.016   | 0.0706 |
| gawil.           | 0   | 0.96 | 0.115    | 0.442(268)  | 0.406(502)    | 0.177    | 0.112  |
| germ1.           | 0   | 0.96 | 0.695    | 0.389(219)  | 0.401(992)    | -0.0446  | 0.114  |
| gpcw1.           | 0   | 0.97 | 0.714    | 0.385(447)  | 0.394(2092)   | -0.0283  | 0.0773 |
| neuc1.           | 0   | 1.00 | 0.117    | 0.344(215)  | 0.388(750)    | -0.182   | 0.116  |
| spsp3.           | 0   | 1.00 | 0.679    | 0.363(153)  | 0.368(2337)   | -0.0515  | 0.124  |
| swed1.           | 0   | 1.00 | 0.106    | 0.381(2909) | 0.395(2844)   | -0.0627  | 0.0388 |
| ukwa1.           | 0   | 0.99 | 0.0602   | 0.380(2789) | 0.397(2372)   | -0.0773  | 0.0412 |
| usa4.            | 0   | 1.01 | 0.747    | 0.383(2956) | 0.386(2930)   | 0.0123   | 0.038  |
| usaw5.           | 0   | 1.02 | 0.318    | 0.375(1107) | 0.381(1316)   | -0.0613  | 0.0615 |
| deCODE.          | 0   | 1.00 | 0.0575   | 0.367(1972) | 0.367(192602) | -0.0661  | 0.0348 |
| EstonianBiobank. | 1   | 0.99 | 0.776    | 0.383(407)  | 0.393(17209)  | -0.021   | 0.0736 |
| HUNT.            | 0   | 1.00 | 0.0395   | 0.337(905)  | 0.361(41914)  | -0.104   | 0.0503 |
| iPSYCH.          | 0   | 1.00 | 0.464    | 0.380(1758) | 0.388(5937)   | -0.029   | 0.0396 |
| UKBiobank.       | 0   | 1.00 | 0.483    | 0.393(1454) | 0.402(58113)  | -0.122   | 0.174  |
| bmron.           | 0   | 0.98 | 0.98     | 0.372(225)  | 0.372(225)    | -0.35    | 0.17   |
| bmrus.           | 0   | 1.02 | 0.511    | 0.388(522)  | 0.412(460)    | -0.0612  | 0.0931 |
| graza.           | 0   | 0.99 | 0.0815   | 0.450(144)  | 0.356(66)     | 0.394    | 0.226  |
| greek.           | 0   | 1.11 | 0.114    | 0.385(186)  | 0.316(87)     | 0.297    | 0.188  |
| norgs.           | 0   | 0.97 | 0.0347   | 0.302(101)  | 0.378(315)    | -0.393   | 0.186  |
| noroe.           | 0   | 1.00 | 0.322    | 0.332(313)  | 0.364(4367)   | -0.0898  | 0.0906 |

**1 0.98 3.65e-08 0.382(41917) 0.377(371549) -0.0532 0.0097**

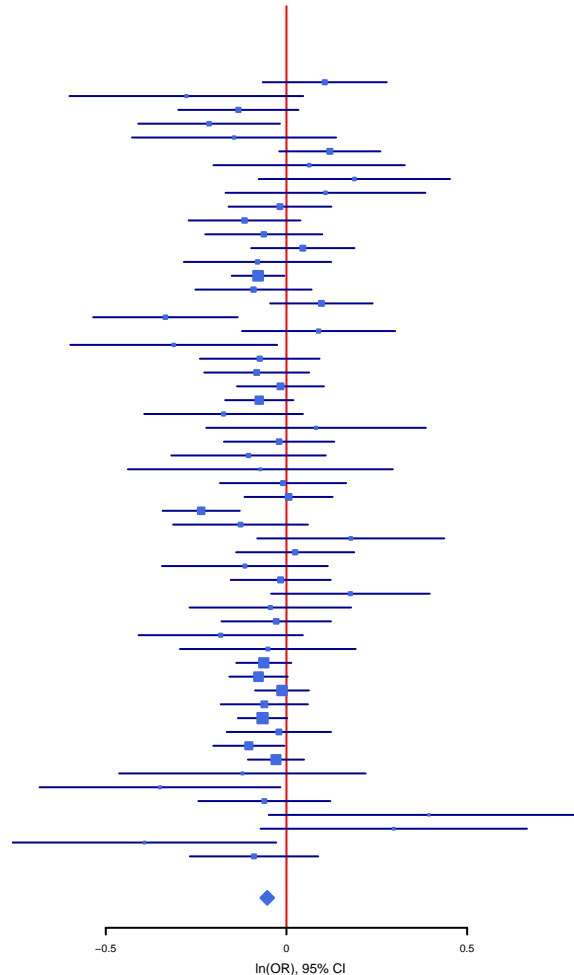

rs10255167

G/A

7:140676153  
het\_P:

0.457

het\_I:

0.8

|                  | ngt | info | p_value | f_ca(n)     | f_co(n)      | ln(OR)  | STDerr |
|------------------|-----|------|---------|-------------|--------------|---------|--------|
| bmau.            | 0   | 0.97 | 0.0492  | 0.191(329)  | 0.224(1810)  | -0.214  | 0.109  |
| bmg2.            | 0   | 1.01 | 0.714   | 0.194(181)  | 0.214(478)   | 0.069   | 0.188  |
| bmg3.            | 0   | 0.95 | 0.372   | 0.217(489)  | 0.232(880)   | -0.0896 | 0.1    |
| bmg9.            | 0   | 1.04 | 0.772   | 0.214(410)  | 0.223(859)   | -0.0397 | 0.113  |
| bmnp.            | 0   | 1.02 | 0.0931  | 0.220(253)  | 0.249(291)   | -0.273  | 0.163  |
| bonn.            | 0   | 1.00 | 0.766   | 0.215(669)  | 0.220(1246)  | -0.025  | 0.0843 |
| butr.            | 0   | 0.97 | 0.579   | 0.227(236)  | 0.242(236)   | -0.0869 | 0.156  |
| dub1.            | 0   | 1.03 | 0.719   | 0.210(150)  | 0.224(796)   | -0.0553 | 0.153  |
| edi1.            | 0   | 1.03 | 0.788   | 0.209(275)  | 0.211(272)   | 0.0413  | 0.154  |
| fat2.            | 0   | 0.99 | 0.739   | 0.230(722)  | 0.225(1027)  | 0.0278  | 0.0836 |
| fran.            | 0   | 0.97 | 0.252   | 0.214(451)  | 0.224(1630)  | -0.0559 | 0.094  |
| gain.            | 0   | 0.99 | 0.328   | 0.211(706)  | 0.227(593)   | -0.0942 | 0.0964 |
| gsk1.            | 0   | 1.02 | 0.205   | 0.197(706)  | 0.216(899)   | -0.111  | 0.0879 |
| hal2.            | 0   | 0.98 | 0.503   | 0.197(410)  | 0.215(479)   | -0.0829 | 0.124  |
| icuk.            | 0   | 0.99 | 0.00438 | 0.200(2456) | 0.222(4069)  | -0.13   | 0.0455 |
| jst5.            | 0   | 0.99 | 0.593   | 0.224(646)  | 0.236(643)   | -0.0509 | 0.0952 |
| may1.            | 0   | 1.03 | 0.969   | 0.231(929)  | 0.230(759)   | 0.00329 | 0.0831 |
| mich.            | 0   | 0.93 | 0.0372  | 0.204(481)  | 0.246(399)   | -0.252  | 0.121  |
| pf1e.            | 0   | 0.98 | 0.035   | 0.190(375)  | 0.194(346)   | -0.28   | 0.135  |
| rom3.            | 0   | 0.98 | 0.813   | 0.210(233)  | 0.213(198)   | 0.0419  | 0.177  |
| st2c.            | 0   | 1.06 | 0.204   | 0.210(628)  | 0.224(1219)  | -0.109  | 0.086  |
| stp1.            | 0   | 0.99 | 0.325   | 0.221(920)  | 0.234(973)   | -0.078  | 0.0792 |
| swa2.            | 0   | 1.02 | 0.395   | 0.228(885)  | 0.215(2252)  | 0.0591  | 0.0695 |
| swei.            | 0   | 0.98 | 0.557   | 0.212(1278) | 0.222(3669)  | -0.0337 | 0.0574 |
| top7.            | 0   | 0.99 | 0.758   | 0.226(416)  | 0.213(350)   | 0.0406  | 0.132  |
| top8.            | 0   | 0.99 | 0.237   | 0.204(148)  | 0.242(291)   | -0.213  | 0.151  |
| uc12.            | 0   | 0.96 | 0.743   | 0.243(726)  | 0.238(693)   | 0.0297  | 0.0905 |
| uclo.            | 0   | 1.01 | 0.0735  | 0.185(427)  | 0.221(488)   | -0.213  | 0.119  |
| uktr.            | 0   | 0.99 | 0.142   | 0.198(130)  | 0.252(130)   | -0.314  | 0.214  |
| ume4.            | 0   | 0.98 | 0.833   | 0.202(565)  | 0.202(569)   | 0.0225  | 0.107  |
| usc2.            | 0   | 0.99 | 0.0474  | 0.224(1293) | 0.247(1156)  | -0.138  | 0.0695 |
| wtc.             | 0   | 1.00 | 0.0305  | 0.210(1644) | 0.231(1641)  | -0.132  | 0.0608 |
| jes2.            | 0   | 1.02 | 0.303   | 0.194(372)  | 0.213(628)   | -0.12   | 0.117  |
| kfo4.            | 0   | 0.95 | 0.716   | 0.226(247)  | 0.232(288)   | -0.0578 | 0.159  |
| tgco2.           | 0   | 0.97 | 0.0756  | 0.233(1032) | 0.263(499)   | -0.163  | 0.0915 |
| bdtrs.           | 0   | 0.91 | 0.103   | 0.199(218)  | 0.230(684)   | -0.235  | 0.144  |
| dutch.           | 0   | 0.98 | 0.451   | 0.229(831)  | 0.237(953)   | -0.0613 | 0.0812 |
| gawil.           | 0   | 1.00 | 0.14    | 0.188(268)  | 0.218(502)   | -0.201  | 0.136  |
| germ1.           | 0   | 1.02 | 0.01    | 0.182(219)  | 0.241(992)   | -0.359  | 0.139  |
| gpwc1.           | 0   | 1.00 | 0.029   | 0.203(447)  | 0.236(2092)  | -0.2    | 0.0914 |
| neuci1.          | 0   | 0.96 | 0.146   | 0.232(215)  | 0.202(750)   | 0.199   | 0.136  |
| spsp3.           | 0   | 0.99 | 0.0638  | 0.200(153)  | 0.243(2337)  | -0.277  | 0.149  |
| swed1.           | 0   | 1.01 | 0.531   | 0.213(2909) | 0.219(2844)  | -0.0286 | 0.0457 |
| ukwa1.           | 0   | 0.98 | 0.481   | 0.218(2789) | 0.224(2372)  | -0.0342 | 0.0485 |
| usaw4.           | 0   | 1.00 | 0.598   | 0.226(2956) | 0.221(2930)  | 0.0234  | 0.0445 |
| usaw5.           | 0   | 0.98 | 0.702   | 0.220(1107) | 0.228(1316)  | -0.0279 | 0.0727 |
| EstonianBiobank. | 1   | 0.98 | 0.363   | 0.220(407)  | 0.229(17209) | -0.0795 | 0.0875 |
| HUJINT.          | 0   | 0.99 | 0.672   | 0.213(905)  | 0.208(41914) | 0.0252  | 0.0595 |
| IPSYCH.          | 0   | 0.99 | 0.364   | 0.223(1758) | 0.231(5937)  | -0.042  | 0.0463 |
| UKBiobank.       | 0   | 1.00 | 0.111   | 0.211(1454) | 0.223(58113) | -0.304  | 0.191  |
| bmrom.           | 0   | 0.98 | 0.191   | 0.199(225)  | 0.236(121)   | -0.26   | 0.199  |
| bmrus.           | 0   | 0.99 | 0.325   | 0.208(522)  | 0.225(460)   | -0.111  | 0.113  |
| graza.           | 0   | 0.96 | 0.336   | 0.205(144)  | 0.239(66)    | -0.253  | 0.263  |
| greek.           | 0   | 0.97 | 0.129   | 0.248(186)  | 0.307(87)    | -0.326  | 0.215  |
| norgs.           | 0   | 0.88 | 0.954   | 0.223(101)  | 0.237(315)   | -0.0129 | 0.222  |
| noroe.           | 0   | 1.00 | 0.735   | 0.231(313)  | 0.239(4367)  | -0.0344 | 0.101  |

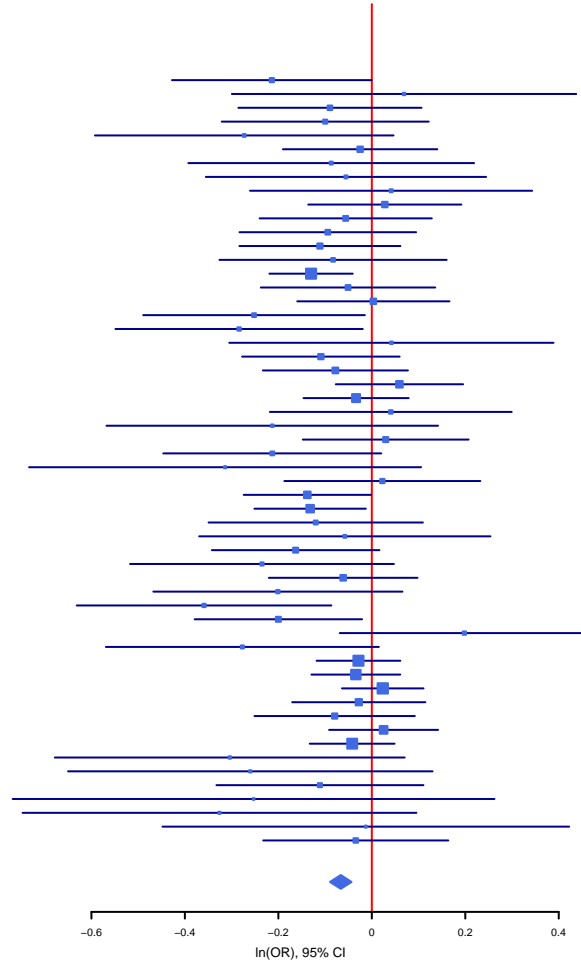

**1 0.99 1.6e-08 0.215(41917) 0.222(371549) -0.0664 0.0118**

rs3088186

C/T

8:10226355

het\_P:

0.617

het\_I:

0.0

|                  | ngt       | info        | p_value         | f_ca(n)             | f_co(n)              | ln(OR)         | STDerr        |
|------------------|-----------|-------------|-----------------|---------------------|----------------------|----------------|---------------|
| bmau.            | 1         | 1.02        | 0.753           | 0.697(329)          | 0.690(1810)          | 0.0289         | 0.0916        |
| bm2g.            | 1         | 0.99        | 0.565           | 0.696(181)          | 0.716(478)           | -0.0976        | 0.17          |
| bm3.             | 1         | 1.02        | 0.143           | 0.672(489)          | 0.698(880)           | -0.127         | 0.0866        |
| bmpo.            | 1         | 1.02        | 0.519           | 0.674(410)          | 0.685(689)           | -0.0656        | 0.102         |
| bmsp.            | 1         | 1.00        | 0.962           | 0.733(253)          | 0.730(291)           | -0.00743       | 0.155         |
| bonn.            | 1         | 1.01        | 0.0647          | 0.676(669)          | 0.706(1246)          | -0.138         | 0.0748        |
| butr.            | 1         | 1.00        | 0.0275          | 0.672(236)          | 0.737(236)           | -0.319         | 0.145         |
| dub1.            | 1         | 1.05        | 0.387           | 0.667(150)          | 0.728(796)           | -0.2379        | 0.132         |
| edf1.            | 0         | 0.97        | 0.723           | 0.731(275)          | 0.718(272)           | 0.0509         | 0.144         |
| fat2.            | 0         | 0.96        | 0.139           | 0.678(722)          | 0.703(1027)          | -0.114         | 0.0772        |
| fran.            | 1         | 1.00        | 0.931           | 0.698(451)          | 0.697(1630)          | 0.00717        | 0.083         |
| gain.            | 0         | 0.98        | 0.349           | 0.689(706)          | 0.705(593)           | -0.0815        | 0.0871        |
| gsk1.            | 1         | 0.98        | 0.232           | 0.679(706)          | 0.700(899)           | -0.0934        | 0.0781        |
| hal2.            | 1         | 0.94        | 0.0216          | 0.653(410)          | 0.710(479)           | -0.253         | 0.11          |
| icuk.            | 1         | 1.01        | 0.717           | 0.692(2456)         | 0.694(4069)          | -0.0142        | 0.0393        |
| js15.            | 1         | 0.98        | 0.939           | 0.677(646)          | 0.681(643)           | -0.03652       | 0.098         |
| may1.            | 1         | 1.00        | 0.141           | 0.682(929)          | 0.705(759)           | -0.114         | 0.0775        |
| mich.            | 1         | 0.96        | 0.54            | 0.697(481)          | 0.709(399)           | -0.0665        | 0.108         |
| pf1e.            | 1         | 1.00        | 0.65            | 0.676(375)          | 0.682(346)           | -0.0529        | 0.116         |
| rom3.            | 1         | 0.93        | 0.845           | 0.700(233)          | 0.694(198)           | 0.0316         | 0.161         |
| si2c.            | 0         | 0.98        | 0.733           | 0.707(628)          | 0.703(1219)          | -0.0277        | 0.0811        |
| stp1.            | 0         | 0.99        | 0.372           | 0.677(920)          | 0.696(973)           | -0.0637        | 0.0713        |
| swa2.            | 0         | 1.00        | 0.939           | 0.693(865)          | 0.687(2252)          | -0.0342        | 0.0636        |
| swei.            | 1         | 0.99        | 0.163           | 0.675(1278)         | 0.686(3669)          | -0.0701        | 0.0502        |
| top7.            | 0         | 1.06        | 0.191           | 0.693(416)          | 0.666(350)           | 0.149          | 0.114         |
| top8.            | 1         | 1.05        | 0.747           | 0.689(148)          | 0.667(291)           | 0.0499         | 0.155         |
| ucl2.            | 1         | 1.00        | 0.171           | 0.677(726)          | 0.651(693)           | 0.11           | 0.0801        |
| uclo.            | 0         | 1.03        | 0.25            | 0.648(427)          | 0.676(488)           | -0.114         | 0.0992        |
| uktr.            | 1         | 0.96        | 0.848           | 0.681(130)          | 0.673(130)           | 0.0365         | 0.191         |
| umr4.            | 1         | 0.97        | 0.11            | 0.674(565)          | 0.706(569)           | -0.15          | 0.0935        |
| usc2.            | 1         | 1.04        | 0.919           | 0.697(1293)         | 0.699(1156)          | 0.00638        | 0.0629        |
| wlcc.            | 0         | 0.96        | 0.53            | 0.675(1644)         | 0.682(1641)          | -0.0346        | 0.055         |
| jea2.            | 1         | 0.99        | 0.282           | 0.691(372)          | 0.712(628)           | -0.111         | 0.103         |
| kfo4.            | 1         | 1.02        | 0.00128         | 0.634(247)          | 0.740(288)           | -0.46          | 0.143         |
| tgco2.           | 0         | 0.95        | 0.7             | 0.687(1032)         | 0.696(499)           | -0.0333        | 0.0865        |
| bdrs.            | 1         | 0.91        | 0.296           | 0.676(218)          | 0.694(684)           | -0.131         | 0.126         |
| dutch.           | 1         | 1.01        | 0.988           | 0.666(831)          | 0.670(953)           | 0.0011         | 0.0719        |
| gaw1.            | 0         | 0.99        | 0.923           | 0.676(268)          | 0.676(502)           | -0.0113        | 0.116         |
| germ1.           | 1         | 0.99        | 0.294           | 0.667(219)          | 0.689(992)           | -0.121         | 0.116         |
| gpcw1.           | 1         | 1.02        | 0.311           | 0.691(447)          | 0.706(2092)          | -0.0811        | 0.08          |
| neuc1.           | 1         | 0.96        | 0.184           | 0.668(215)          | 0.695(750)           | -0.162         | 0.122         |
| spsp3.           | 1         | 0.99        | 0.448           | 0.732(153)          | 0.712(2337)          | 0.103          | 0.135         |
| swed1.           | 1         | 0.99        | 0.0784          | 0.675(2909)         | 0.691(2844)          | -0.0718        | 0.0408        |
| ukwa1.           | 1         | 1.02        | 0.081           | 0.678(2789)         | 0.690(2372)          | -0.0744        | 0.0426        |
| usa4.            | 1         | 1.00        | 0.0486          | 0.703(2956)         | 0.720(2930)          | -0.0808        | 0.041         |
| usa5.            | 1         | 0.99        | 0.0489          | 0.688(1107)         | 0.720(1316)          | -0.131         | 0.0663        |
| deCODE.          | 0         | 1.00        | 0.515           | 0.739(1972)         | 0.739(192602)        | 0.0253         | 0.0389        |
| EstonianBiobank. | 1         | 0.89        | 0.0448          | 0.698(407)          | 0.723(17209)         | -0.161         | 0.0803        |
| HUNT.            | 0         | 0.98        | 0.226           | 0.646(905)          | 0.657(41914)         | -0.0626        | 0.0517        |
| iPSYCH.          | 1         | 1.00        | 0.271           | 0.670(1758)         | 0.680(5937)          | -0.045         | 0.0409        |
| UKBiobank.       | 0         | 1.00        | 0.872           | 0.685(1454)         | 0.684(58113)         | -0.0273        | 0.17          |
| bmron.           | 1         | 0.89        | 0.095           | 0.684(251)          | 0.744(121)           | -0.328         | 0.196         |
| bmrus.           | 1         | 1.02        | 0.61            | 0.725(522)          | 0.708(460)           | 0.0514         | 0.101         |
| graza.           | 1         | 0.96        | 0.912           | 0.663(144)          | 0.659(66)            | 0.0255         | 0.232         |
| greek.           | 1         | 1.07        | 0.878           | 0.715(186)          | 0.722(87)            | -0.0305        | 0.199         |
| norgs.           | 0         | 0.96        | 0.14            | 0.645(101)          | 0.675(315)           | -0.271         | 0.184         |
| noroe.           | 1         | 1.00        | 0.442           | 0.670(313)          | 0.675(4367)          | -0.0699        | 0.0909        |
|                  | <b>42</b> | <b>0.99</b> | <b>2.08e-08</b> | <b>0.686(41917)</b> | <b>0.713(371549)</b> | <b>-0.0567</b> | <b>0.0101</b> |

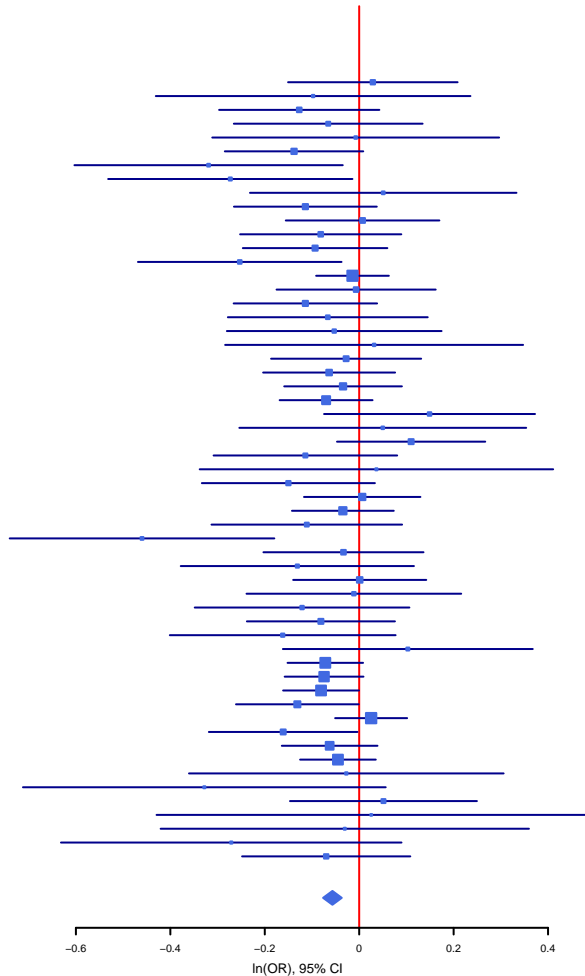

rs62489493

C/G

8:9763581

het\_P:

0.547

het\_I:

0.0

|                  | ngt | info | p_value    | f_ca(n)     | f_co(n)       | ln(OR)  | STDerr |
|------------------|-----|------|------------|-------------|---------------|---------|--------|
| bmau.            | 0   | 1.02 | 0.463      | 0.852(329)  | 0.862(1810)   | -0.0875 | 0.119  |
| bm2.             | 0   | 1.04 | 0.136      | 0.842(181)  | 0.879(478)    | -0.319  | 0.214  |
| bm3.             | 0   | 1.03 | 0.165      | 0.849(489)  | 0.869(880)    | -0.16   | 0.115  |
| bmpp.            | 0   | 0.98 | 0.323      | 0.850(410)  | 0.865(689)    | -0.136  | 0.137  |
| bmsp.            | 0   | 0.91 | 0.541      | 0.884(253)  | 0.895(291)    | -0.139  | 0.227  |
| bonn.            | 0   | 1.01 | 0.62       | 0.853(669)  | 0.857(1246)   | -0.0487 | 0.0981 |
| butr.            | 0   | 1.02 | 0.529      | 0.884(236)  | 0.897(236)    | -0.13   | 0.207  |
| club1.           | 0   | 0.97 | 0.743      | 0.877(150)  | 0.874(736)    | 0.063   | 0.196  |
| ed1.             | 0   | 1.00 | 0.453      | 0.876(275)  | 0.854(272)    | 0.142   | 0.19   |
| fat2.            | 0   | 0.98 | 0.0322     | 0.844(722)  | 0.870(1027)   | -0.216  | 0.101  |
| fran.            | 0   | 0.99 | 0.254      | 0.872(451)  | 0.884(1630)   | -0.132  | 0.116  |
| gain.            | 0   | 0.97 | 0.659      | 0.856(706)  | 0.863(593)    | -0.0513 | 0.116  |
| gsk1.            | 0   | 1.02 | 0.684      | 0.851(706)  | 0.858(899)    | -0.0407 | 0.1    |
| ha2.             | 0   | 0.98 | 0.193      | 0.849(410)  | 0.873(479)    | -0.188  | 0.144  |
| icuk.            | 0   | 0.98 | 0.117      | 0.861(2456) | 0.869(4069)   | -0.0843 | 0.0538 |
| jst5.            | 0   | 0.95 | 0.891(646) | 0.873(643)  | 0.873(643)    | -0.144  | 0.122  |
| may1.            | 0   | 0.98 | 0.878      | 0.853(929)  | 0.854(759)    | -0.0156 | 0.102  |
| mich.            | 0   | 0.99 | 0.0325     | 0.850(481)  | 0.886(399)    | -0.312  | 0.146  |
| pf1e.            | 0   | 0.96 | 0.891      | 0.854(375)  | 0.852(346)    | 0.0213  | 0.155  |
| rom3.            | 0   | 1.00 | 0.0103     | 0.901(233)  | 0.848(198)    | 0.574   | 0.224  |
| st2c.            | 0   | 1.02 | 0.982      | 0.869(628)  | 0.864(1219)   | 0.0024  | 0.106  |
| stp1.            | 0   | 0.96 | 0.0549     | 0.854(920)  | 0.872(973)    | -0.189  | 0.0985 |
| sw2.             | 0   | 0.99 | 0.99       | 0.855(885)  | 0.859(2252)   | -0.045  | 0.0835 |
| swei.            | 0   | 0.98 | 0.437      | 0.850(1278) | 0.855(3669)   | -0.0514 | 0.0661 |
| top7.            | 0   | 0.92 | 0.0902     | 0.866(416)  | 0.836(350)    | 0.269   | 0.159  |
| top8.            | 0   | 1.05 | 0.999      | 0.865(148)  | 0.859(291)    | 0.0003  | 0.21   |
| ucl2.            | 0   | 0.99 | 0.854      | 0.850(726)  | 0.846(693)    | 0.0195  | 0.106  |
| uclo.            | 0   | 0.97 | 0.962      | 0.865(427)  | 0.865(488)    | 0.00678 | 0.141  |
| uktr.            | 0   | 0.94 | 0.43       | 0.850(130)  | 0.873(130)    | -0.208  | 0.264  |
| ume4.            | 0   | 1.03 | 0.0546     | 0.854(565)  | 0.893(569)    | -0.239  | 0.125  |
| usc2.            | 0   | 1.00 | 0.36       | 0.878(1293) | 0.873(1156)   | 0.0816  | 0.0892 |
| wtc.             | 0   | 1.02 | 0.715      | 0.859(1644) | 0.856(1641)   | 0.0261  | 0.0713 |
| jea2.            | 0   | 0.94 | 0.634      | 0.844(372)  | 0.848(628)    | -0.0638 | 0.134  |
| kfo4.            | 0   | 0.94 | 0.271      | 0.837(247)  | 0.868(288)    | -0.21   | 0.191  |
| tgco2.           | 0   | 1.01 | 0.269      | 0.856(1032) | 0.871(499)    | -0.126  | 0.114  |
| bdtrs.           | 0   | 1.01 | 0.871      | 0.866(218)  | 0.864(684)    | 0.0264  | 0.163  |
| dutch.           | 0   | 0.96 | 0.0247     | 0.831(831)  | 0.860(953)    | -0.215  | 0.0959 |
| gawil.           | 0   | 1.00 | 0.987      | 0.871(268)  | 0.878(262)    | 0.0027  | 0.161  |
| germ1.           | 0   | 0.96 | 0.243      | 0.847(219)  | 0.864(992)    | -0.183  | 0.157  |
| gpw1.            | 0   | 1.01 | 0.188      | 0.859(447)  | 0.874(2092)   | -0.14   | 0.106  |
| neuc1.           | 0   | 0.97 | 0.438      | 0.857(215)  | 0.868(750)    | -0.126  | 0.162  |
| spsp3.           | 0   | 0.96 | 0.0614     | 0.857(153)  | 0.892(2337)   | -0.329  | 0.176  |
| swed1.           | 0   | 0.97 | 0.0133     | 0.844(2909) | 0.861(2844)   | -0.134  | 0.0541 |
| ukwa1.           | 0   | 0.99 | 0.0145     | 0.847(2789) | 0.863(2372)   | -0.14   | 0.0572 |
| usaw4.           | 0   | 0.98 | 0.0705     | 0.863(2956) | 0.879(2930)   | -0.152  | 0.0564 |
| usaw5.           | 0   | 0.98 | 0.649      | 0.860(1107) | 0.871(1316)   | -0.0404 | 0.0889 |
| deCODE.          | 0   | 1.00 | 0.0526     | 0.883(1972) | 0.883(192602) | -0.098  | 0.0506 |
| EstonianBiobank. | 1   | 0.89 | 0.0196     | 0.827(407)  | 0.855(17209)  | -0.227  | 0.0972 |
| HUNT.            | 0   | 0.99 | 0.137      | 0.835(905)  | 0.847(41914)  | -0.0999 | 0.0672 |
| iPSYCH.          | 0   | 0.99 | 0.368      | 0.848(1758) | 0.854(5937)   | -0.0488 | 0.0542 |
| UKBiobank.       | 0   | 1.00 | 0.659      | 0.865(1454) | 0.867(58113)  | -0.0737 | 0.167  |
| bmrm.            | 0   | 1.04 | 0.164      | 0.895(225)  | 0.910(121)    | -0.4    | 0.288  |
| bmrus.           | 0   | 0.99 | 0.445      | 0.842(522)  | 0.850(460)    | -0.0974 | 0.128  |
| graza.           | 0   | 1.05 | 0.251      | 0.840(144)  | 0.795(66)     | 0.306   | 0.266  |
| greek.           | 0   | 1.04 | 0.294      | 0.894(186)  | 0.862(87)     | 0.289   | 0.275  |
| norgs.           | 0   | 0.94 | 0.102      | 0.812(101)  | 0.857(315)    | -0.392  | 0.24   |
| noroe.           | 0   | 0.99 | 0.342      | 0.848(313)  | 0.861(4367)   | -0.114  | 0.12   |

1 0.99 2.64e-11 0.856(41917) 0.872(371549) -0.0897 0.0135

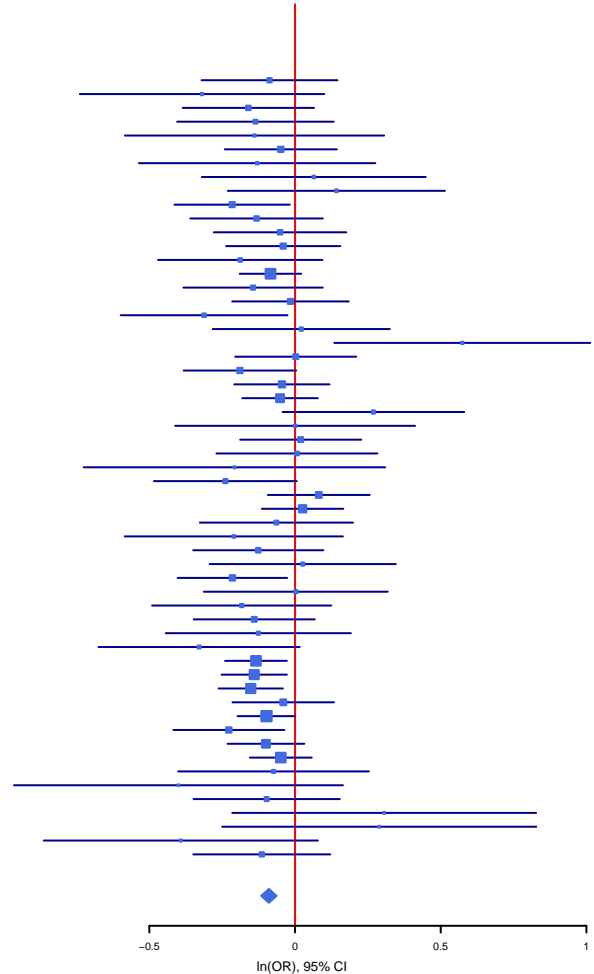

rs2953928

G/A

8:34152492

het\_P:

0.422

het\_I:

2.5

|                  | ngt      | info        | p_value         | f_ca(n)             | f_co(n)              | ln(OR)        | STDerr      |
|------------------|----------|-------------|-----------------|---------------------|----------------------|---------------|-------------|
| bmau.            | 0        | 1.00        | 0.0529          | 0.924(329)          | 0.943(1810)          | -0.318        | 0.164       |
| bm2.             | 1        | 0.99        | 0.0768          | 0.972(181)          | 0.949(478)           | 0.771         | 0.436       |
| bm3.             | 0        | 0.96        | 0.0544          | 0.954(489)          | 0.966(889)           | -0.272        | 0.111       |
| bmpo.            | 0        | 0.95        | 0.522           | 0.957(410)          | 0.959(689)           | -0.156        | 0.244       |
| bmsp.            | 0        | 0.95        | 0.986           | 0.956(253)          | 0.953(291)           | 0.00558       | 0.329       |
| bonn.            | 0        | 0.99        | 0.112           | 0.952(669)          | 0.964(1246)          | -0.272        | 0.172       |
| butr.            | 0        | 0.97        | 0.652           | 0.977(236)          | 0.981(236)           | -0.207        | 0.459       |
| dub1.            | 0        | 1.04        | 0.119           | 0.940(150)          | 0.915(796)           | 0.401         | 0.258       |
| edi1.            | 0        | 0.98        | 0.198           | 0.955(275)          | 0.941(272)           | 0.373         | 0.29        |
| fal2.            | 0        | 0.97        | 0.298           | 0.943(722)          | 0.949(1027)          | -0.162        | 0.156       |
| fran.            | 0        | 1.01        | 0.298           | 0.961(451)          | 0.948(1630)          | 0.199         | 0.191       |
| gain.            | 0        | 1.02        | 0.897           | 0.951(706)          | 0.949(593)           | 0.023         | 0.179       |
| gsk1.            | 0        | 1.04        | 0.262           | 0.935(706)          | 0.946(899)           | -0.166        | 0.148       |
| hal2.            | 0        | 0.98        | 0.582           | 0.947(410)          | 0.947(479)           | 0.122         | 0.221       |
| icuk.            | 0        | 1.01        | 0.0492          | 0.935(2456)         | 0.943(4069)          | -0.148        | 0.0754      |
| jst5.            | 0        | 0.98        | 0.447           | 0.956(646)          | 0.948(643)           | 0.143         | 0.188       |
| may1.            | 0        | 1.02        | 0.24            | 0.940(929)          | 0.951(759)           | -0.184        | 0.157       |
| mich.            | 0        | 1.03        | 0.0698          | 0.934(441)          | 0.956(399)           | -0.309        | 0.116       |
| pf1e.            | 0        | 0.99        | 0.979           | 0.947(375)          | 0.945(346)           | 0.00628       | 0.24        |
| rom3.            | 0        | 1.05        | 0.649           | 0.970(233)          | 0.977(198)           | -0.207        | 0.456       |
| st2c.            | 0        | 0.99        | 0.217           | 0.946(628)          | 0.955(1219)          | -0.206        | 0.167       |
| stp1.            | 0        | 0.98        | 0.406           | 0.941(920)          | 0.950(973)           | -0.122        | 0.147       |
| swa2.            | 0        | 0.99        | 0.864           | 0.940(885)          | 0.941(2252)          | -0.0212       | 0.124       |
| swel.            | 0        | 1.01        | 0.0608          | 0.936(1278)         | 0.946(3669)          | -0.162        | 0.0971      |
| top7.            | 0        | 0.94        | 0.016           | 0.931(416)          | 0.954(350)           | -0.599        | 0.249       |
| top8.            | 0        | 1.02        | 0.917           | 0.960(148)          | 0.964(291)           | -0.0392       | 0.577       |
| ucl2.            | 0        | 0.99        | 0.828           | 0.938(726)          | 0.939(693)           | -0.0344       | 0.158       |
| uclo.            | 0        | 1.04        | 0.877           | 0.939(427)          | 0.938(488)           | 0.0302        | 0.195       |
| uktr.            | 0        | 0.93        | 0.614           | 0.935(130)          | 0.945(130)           | -0.194        | 0.384       |
| ume4.            | 0        | 1.02        | 0.216           | 0.939(565)          | 0.950(569)           | -0.228        | 0.184       |
| usc2.            | 0        | 0.99        | 0.876           | 0.948(1293)         | 0.950(1156)          | -0.021        | 0.134       |
| wfcc.            | 0        | 1.00        | 0.00456         | 0.922(1644)         | 0.942(1641)          | -0.289        | 0.102       |
| jsa2.            | 0        | 0.97        | 0.759           | 0.955(372)          | 0.956(628)           | -0.0713       | 0.232       |
| kfo4.            | 0        | 1.02        | 0.01            | 0.936(247)          | 0.964(288)           | -0.784        | 0.305       |
| tgco2.           | 0        | 0.99        | 0.585           | 0.945(1032)         | 0.939(499)           | 0.0908        | 0.166       |
| bdrs.            | 0        | 1.05        | 0.402           | 0.938(218)          | 0.950(684)           | -0.194        | 0.232       |
| dutch.           | 0        | 0.98        | 0.856           | 0.948(831)          | 0.946(953)           | 0.0277        | 0.153       |
| gawil.           | 0        | 0.97        | 0.106           | 0.940(268)          | 0.956(502)           | -0.4          | 0.247       |
| germ1.           | 0        | 1.00        | 0.26            | 0.941(219)          | 0.958(992)           | -0.363        | 0.237       |
| gpc4.            | 0        | 1.00        | 0.959           | 0.946(447)          | 0.946(2092)          | -0.00844      | 0.165       |
| neu1.            | 0        | 1.00        | 0.0745          | 0.930(215)          | 0.950(750)           | -0.408        | 0.229       |
| spsp3.           | 0        | 0.95        | 0.993           | 0.961(153)          | 0.959(2337)          | -0.0029       | 0.313       |
| swed1.           | 0        | 0.97        | 0.0438          | 0.939(2909)         | 0.949(2844)          | -0.168        | 0.0833      |
| ukwa1.           | 0        | 1.02        | 0.0257          | 0.928(2789)         | 0.940(2372)          | -0.179        | 0.0803      |
| usaw4.           | 0        | 1.00        | 0.264           | 0.948(2956)         | 0.954(2930)          | -0.0966       | 0.0864      |
| usaw5.           | 0        | 1.05        | 0.536           | 0.951(1107)         | 0.949(1316)          | 0.0837        | 0.135       |
| ds9ODE.          | 0        | 1.00        | 0.02            | 0.920(1972)         | 0.920(19262)         | -0.008        | 0.0939      |
| EstonianBiobank. | 1        | 1.00        | 0.471           | 0.942(407)          | 0.948(17209)         | -0.11         | 0.153       |
| HUNT.            | 0        | 1.00        | 0.669           | 0.948(905)          | 0.951(41914)         | -0.0475       | 0.111       |
| iPSYCH.          | 0        | 1.01        | 0.237           | 0.940(1758)         | 0.945(5937)          | -0.0962       | 0.0813      |
| UKBiobank.       | 0        | 1.00        | 0.0215          | 0.931(1454)         | 0.941(58113)         | -0.344        | 0.149       |
| bmrus.           | 0        | 1.07        | 0.629           | 0.966(522)          | 0.961(460)           | 0.114         | 0.236       |
| norgs.           | 0        | 0.94        | 0.629           | 0.946(101)          | 0.943(315)           | 0.193         | 0.4         |
| norec.           | 0        | 0.98        | 0.412           | 0.952(313)          | 0.943(4367)          | 0.163         | 0.199       |
|                  | <b>2</b> | <b>1.00</b> | <b>6.25e-09</b> | <b>0.941(41917)</b> | <b>0.933(371549)</b> | <b>-0.116</b> | <b>0.02</b> |

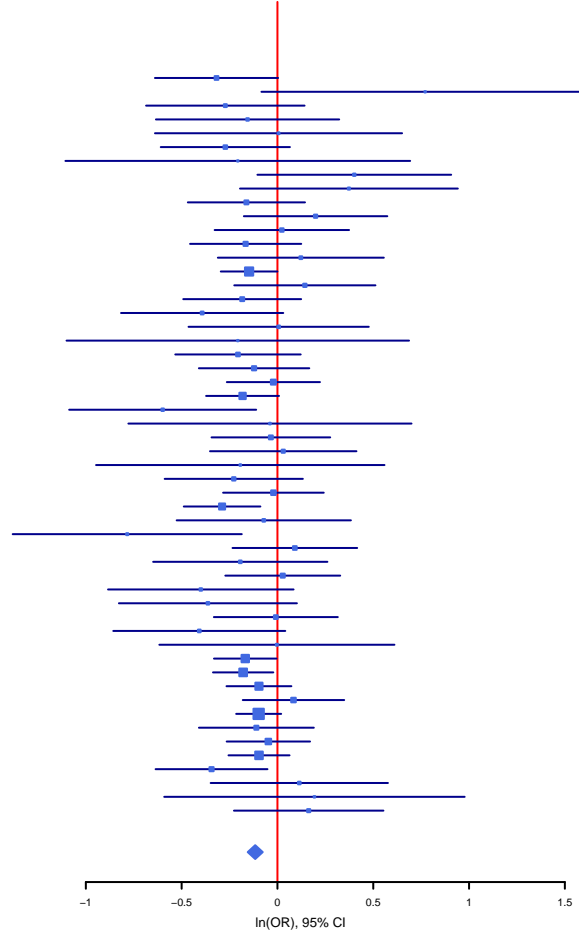

rs6992333

A/G

8:144993377

het\_P:

0.386

het\_I:

4.2

|                  | ngt      | info        | p_value         | f_ca(n)             | f_co(n)              | ln(OR)         | STDerr      |
|------------------|----------|-------------|-----------------|---------------------|----------------------|----------------|-------------|
| bmau.            | 0        | 0.97        | 0.666           | 0.562(329)          | 0.573(1810)          | -0.0378        | 0.0876      |
| bmj2.            | 0        | 0.99        | 0.462           | 0.572(181)          | 0.598(478)           | 0.117          | 0.159       |
| bmj3.            | 0        | 0.97        | 0.873           | 0.575(489)          | 0.578(880)           | -0.0134        | 0.0839      |
| bmjpc.           | 0        | 0.98        | 0.234           | 0.527(451)          | 0.540(839)           | -0.3369        | 0.0932      |
| bmsp.            | 0        | 0.97        | 0.0114          | 0.482(253)          | 0.560(291)           | -0.353         | 0.139       |
| bonn.            | 0        | 1.02        | 0.212           | 0.564(669)          | 0.588(1246)          | -0.087         | 0.0696      |
| butr.            | 0        | 0.98        | 0.26            | 0.559(236)          | 0.595(236)           | -0.15          | 0.134       |
| dub1.            | 0        | 0.99        | 0.586           | 0.550(150)          | 0.538(796)           | 0.0703         | 0.129       |
| edf1.            | 0        | 0.92        | 0.878           | 0.544(275)          | 0.557(272)           | -0.0204        | 0.133       |
| fal2.            | 0        | 0.82        | 0.859           | 0.567(722)          | 0.574(1027)          | -0.014         | 0.0784      |
| fran.            | 0        | 0.97        | 0.24            | 0.527(451)          | 0.548(1630)          | -0.0929        | 0.178       |
| gain.            | 0        | 0.93        | 0.38            | 0.551(706)          | 0.571(593)           | -0.073         | 0.0832      |
| gsk1.            | 0        | 1.03        | 0.691           | 0.556(706)          | 0.565(899)           | -0.0282        | 0.0709      |
| hal2.            | 0        | 0.94        | 0.809           | 0.555(410)          | 0.559(479)           | -0.0248        | 0.103       |
| icuk.            | 0        | 0.99        | 0.664           | 0.568(2456)         | 0.573(4069)          | -0.016         | 0.0371      |
| jst5.            | 0        | 1.02        | 0.919           | 0.586(646)          | 0.585(643)           | 0.00807        | 0.0799      |
| may1.            | 0        | 0.99        | 0.491           | 0.575(929)          | 0.587(759)           | -0.05          | 0.0726      |
| rich.            | 0        | 1.01        | 0.555           | 0.563(481)          | 0.549(399)           | 0.0571         | 0.0968      |
| pf1e.            | 0        | 0.99        | 0.449           | 0.571(375)          | 0.600(346)           | 0.111          | 0.111       |
| rom3.            | 0        | 1.03        | 0.466           | 0.577(233)          | 0.601(198)           | -0.105         | 0.144       |
| st2c.            | 0        | 0.87        | 0.935           | 0.563(628)          | 0.560(1219)          | -0.00652       | 0.0791      |
| stp1.            | 0        | 0.93        | 0.313           | 0.570(920)          | 0.584(973)           | -0.0699        | 0.0693      |
| swa2.            | 0        | 0.89        | 0.148           | 0.577(885)          | 0.597(2252)          | -0.0912        | 0.0631      |
| swei.            | 0        | 0.98        | 0.123           | 0.575(1278)         | 0.594(3669)          | -0.0736        | 0.0478      |
| top7.            | 0        | 0.89        | 0.961           | 0.615(416)          | 0.602(350)           | -0.00592       | 0.119       |
| top8.            | 0        | 1.07        | 0.903           | 0.574(148)          | 0.581(291)           | -0.0176        | 0.143       |
| ucl2.            | 0        | 1.02        | 0.207           | 0.554(726)          | 0.581(693)           | -0.0957        | 0.0759      |
| uclo.            | 0        | 0.92        | 0.984           | 0.557(427)          | 0.556(488)           | -0.0021        | 0.0998      |
| uktr.            | 0        | 0.90        | 0.848           | 0.600(130)          | 0.592(130)           | 0.0363         | 0.189       |
| ume4.            | 0        | 1.02        | 0.0664          | 0.578(565)          | 0.619(569)           | -0.158         | 0.086       |
| usc2.            | 0        | 1.00        | 0.359           | 0.569(1293)         | 0.562(1156)          | 0.0546         | 0.0595      |
| wfcc.            | 0        | 0.90        | 0.196           | 0.550(1644)         | 0.564(1641)          | -0.0691        | 0.0535      |
| jea2.            | 0        | 0.99        | 0.959           | 0.635(372)          | 0.635(628)           | -0.00501       | 0.0985      |
| kfo4.            | 0        | 0.95        | 0.633           | 0.617(247)          | 0.600(288)           | 0.0681         | 0.138       |
| tgco2.           | 0        | 0.93        | 0.108           | 0.555(1032)         | 0.587(499)           | -0.132         | 0.082       |
| bdtrs.           | 0        | 0.97        | 0.78            | 0.559(218)          | 0.565(684)           | -0.0321        | 0.115       |
| dutch.           | 0        | 1.01        | 0.296           | 0.568(831)          | 0.590(953)           | -0.0716        | 0.0685      |
| gawil.           | 0        | 1.06        | 0.804           | 0.570(268)          | 0.572(502)           | 0.0263         | 0.106       |
| germ1.           | 0        | 0.99        | 0.00139         | 0.518(219)          | 0.598(992)           | -0.351         | 0.11        |
| gpcw1.           | 0        | 0.98        | 0.383           | 0.550(447)          | 0.564(2092)          | -0.0659        | 0.0755      |
| neu1.            | 0        | 1.08        | 0.02499         | 0.592(215)          | 0.573(750)           | -0.3305        | 0.139       |
| psp3.            | 0        | 0.97        | 0.593           | 0.566(153)          | 0.538(237)           | 0.0656         | 0.123       |
| swd1.            | 0        | 1.02        | 0.0129          | 0.589(2909)         | 0.610(2844)          | -0.095         | 0.0382      |
| ukwa1.           | 0        | 1.00        | 0.00238         | 0.548(2789)         | 0.580(2372)          | -0.122         | 0.0402      |
| usaw4.           | 0        | 0.99        | 0.112           | 0.558(2956)         | 0.573(2930)          | -0.0595        | 0.0374      |
| usaw5.           | 0        | 0.95        | 0.44            | 0.549(1107)         | 0.556(1316)          | -0.048         | 0.0622      |
| EstonianBiobank. | 1        | 1.00        | 0.781           | 0.626(407)          | 0.630(17209)         | -0.0206        | 0.0739      |
| HUNT.            | 0        | 0.99        | 0.651           | 0.596(905)          | 0.612(41914)         | -0.0217        | 0.0486      |
| iPSYCH.          | 0        | 0.80        | 0.785           | 0.596(1758)         | 0.598(5937)          | -0.012         | 0.0438      |
| UKBiobank.       | 0        | 1.00        | 0.766           | 0.567(1454)         | 0.570(58113)         | -0.0514        | 0.173       |
| bmrom.           | 0        | 0.96        | 0.733           | 0.564(225)          | 0.574(121)           | -0.0576        | 0.169       |
| bmrus.           | 0        | 0.98        | 0.00776         | 0.617(522)          | 0.681(460)           | -0.261         | 0.0979      |
| graza.           | 0        | 1.08        | 0.749           | 0.524(144)          | 0.508(66)            | 0.065          | 0.203       |
| greek.           | 0        | 0.91        | 0.327           | 0.556(186)          | 0.602(87)            | -0.193         | 0.197       |
| norgs.           | 0        | 0.85        | 0.254           | 0.656(101)          | 0.597(315)           | 0.217          | 0.19        |
| noroe.           | 0        | 1.00        | 0.593           | 0.594(313)          | 0.607(4367)          | -0.0467        | 0.0873      |
|                  | <b>1</b> | <b>0.97</b> | <b>1.62e-09</b> | <b>0.568(41917)</b> | <b>0.590(371549)</b> | <b>-0.0602</b> | <b>0.01</b> |

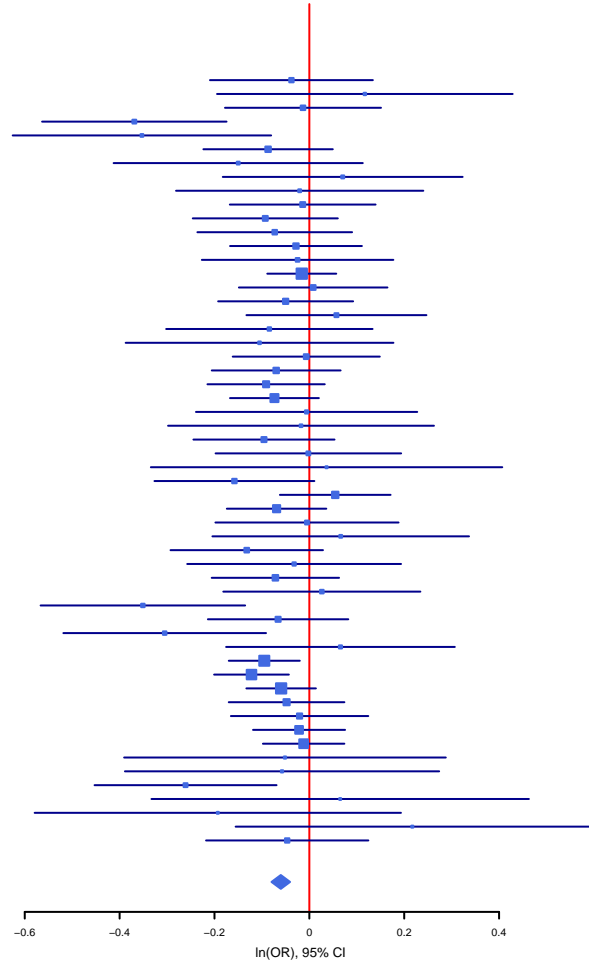



rs10973201

T/C

9:37090538

het\_P:

0.761

het\_I:

0.0

|            | ngt | info | p_value | f_ca(n)     | f_co(n)      | ln(OR)   | STDerr |
|------------|-----|------|---------|-------------|--------------|----------|--------|
| bmau.      | 0   | 0.81 | 0.0878  | 0.873(329)  | 0.893(1810)  | -0.243   | 0.142  |
| bmng2.     | 0   | 0.75 | 0.689   | 0.902(181)  | 0.890(478)   | -0.12    | 0.301  |
| bmng3.     | 0   | 0.77 | 0.911   | 0.871(489)  | 0.874(880)   | -0.0154  | 0.139  |
| bmpp.      | 0   | 0.77 | 0.0595  | 0.812(410)  | 0.823(689)   | -0.267   | 0.142  |
| bmsp.      | 0   | 0.75 | 0.381   | 0.875(253)  | 0.891(291)   | -0.216   | 0.246  |
| bmnn.      | 0   | 0.75 | 0.0637  | 0.872(669)  | 0.882(1246)  | -0.228   | 0.123  |
| bntf.      | 0   | 0.85 | 0.395   | 0.870(410)  | 0.887(236)   | -0.183   | 0.226  |
| dub1.      | 0   | 0.84 | 0.00272 | 0.855(150)  | 0.908(796)   | -0.624   | 0.228  |
| edi1.      | 0   | 0.77 | 0.263   | 0.879(275)  | 0.894(272)   | -0.258   | 0.231  |
| fat2.      | 0   | 0.76 | 0.0867  | 0.900(722)  | 0.881(1027)  | 0.222    | 0.13   |
| fran.      | 0   | 0.75 | 0.174   | 0.900(451)  | 0.888(1630)  | 0.198    | 0.146  |
| gain.      | 0   | 0.80 | 0.927   | 0.893(706)  | 0.890(593)   | 0.013    | 0.142  |
| gsk1.      | 0   | 0.88 | 0.826   | 0.879(706)  | 0.883(899)   | -0.0258  | 0.117  |
| hai2.      | 0   | 0.80 | 0.627   | 0.870(410)  | 0.883(479)   | -0.0821  | 0.169  |
| icuk.      | 0   | 0.92 | 0.0715  | 0.888(2456) | 0.897(4069)  | -0.117   | 0.0649 |
| jst5.      | 0   | 0.79 | 0.132   | 0.880(646)  | 0.895(643)   | -0.215   | 0.143  |
| may1.      | 0   | 0.82 | 0.0988  | 0.878(929)  | 0.897(759)   | -0.208   | 0.126  |
| mich.      | 0   | 0.77 | 0.832   | 0.887(481)  | 0.886(399)   | 0.0368   | 0.173  |
| pf1e.      | 0   | 0.79 | 0.122   | 0.867(375)  | 0.885(346)   | -0.288   | 0.186  |
| rom3.      | 0   | 0.78 | 0.947   | 0.880(233)  | 0.882(198)   | 0.0167   | 0.25   |
| st2c.      | 0   | 0.78 | 0.637   | 0.898(628)  | 0.891(1219)  | 0.0634   | 0.134  |
| stp1.      | 0   | 0.80 | 0.935   | 0.885(800)  | 0.883(973)   | 0.0022   | 0.116  |
| swa2.      | 0   | 0.77 | 0.0222  | 0.862(885)  | 0.884(2252)  | -0.227   | 0.0992 |
| swei.      | 0   | 0.80 | 0.159   | 0.874(1278) | 0.884(3669)  | -0.112   | 0.0795 |
| top7.      | 0   | 0.80 | 0.511   | 0.883(416)  | 0.902(350)   | -0.13    | 0.197  |
| top8.      | 0   | 0.81 | 0.381   | 0.867(148)  | 0.889(291)   | -0.216   | 0.247  |
| ucl2.      | 0   | 0.78 | 0.287   | 0.895(726)  | 0.906(693)   | -0.153   | 0.143  |
| ucio.      | 0   | 0.85 | 0.954   | 0.885(427)  | 0.888(488)   | -0.00944 | 0.163  |
| uktr.      | 0   | 0.88 | 0.952   | 0.888(130)  | 0.870(130)   | -0.0166  | 0.276  |
| um4.       | 0   | 0.79 | 0.618   | 0.872(565)  | 0.879(569)   | -0.0715  | 0.143  |
| usc2.      | 0   | 0.82 | 0.00761 | 0.885(1293) | 0.904(1156)  | -0.285   | 0.107  |
| wicc.      | 0   | 0.82 | 0.867   | 0.887(1644) | 0.888(1641)  | 0.0149   | 0.0887 |
| jea2.      | 0   | 0.76 | 0.703   | 0.804(372)  | 0.801(628)   | 0.0517   | 0.136  |
| kfo4.      | 0   | 0.71 | 0.61    | 0.860(247)  | 0.879(288)   | -0.118   | 0.232  |
| tgco2.     | 0   | 0.78 | 0.941   | 0.888(1032) | 0.890(499)   | -0.0104  | 0.141  |
| bdtrs.     | 0   | 0.82 | 0.759   | 0.886(218)  | 0.889(684)   | -0.0595  | 0.194  |
| dutch.     | 0   | 0.72 | 0.932   | 0.900(831)  | 0.902(953)   | 0.0114   | 0.134  |
| gawil.     | 0   | 0.69 | 0.923   | 0.890(268)  | 0.889(502)   | -0.0204  | 0.21   |
| germ1.     | 0   | 0.73 | 0.972   | 0.884(219)  | 0.883(992)   | 0.00707  | 0.2    |
| gpcw1.     | 0   | 0.75 | 0.471   | 0.888(447)  | 0.895(2092)  | -0.0985  | 0.137  |
| neuc1.     | 0   | 0.73 | 0.0436  | 0.870(215)  | 0.897(750)   | -0.4     | 0.198  |
| spsp3.     | 0   | 0.71 | 0.598   | 0.903(153)  | 0.894(2337)  | 0.126    | 0.239  |
| swed1.     | 0   | 0.77 | 0.376   | 0.876(2909) | 0.880(2844)  | -0.0561  | 0.0656 |
| ukw1.      | 0   | 0.80 | 0.932   | 0.892(2789) | 0.898(2372)  | -0.209   | 0.0718 |
| usaw4.     | 0   | 0.76 | 0.242   | 0.893(2956) | 0.899(2930)  | -0.0815  | 0.0697 |
| usaw5.     | 0   | 0.77 | 0.443   | 0.897(1107) | 0.907(1316)  | -0.0881  | 0.115  |
| HUNT.      | 0   | 0.85 | 0.322   | 0.885(905)  | 0.892(41914) | -0.0827  | 0.0834 |
| iPSYCH.    | 0   | 0.76 | 0.0697  | 0.875(1758) | 0.885(5937)  | -0.122   | 0.0672 |
| UKBiobank. | 0   | 0.96 | 0.589   | 0.889(1454) | 0.891(58113) | -0.0894  | 0.166  |
| bmrom.     | 0   | 0.77 | 0.929   | 0.889(225)  | 0.902(121)   | 0.0279   | 0.311  |
| bmrus.     | 0   | 0.74 | 0.715   | 0.841(526)  | 0.842(460)   | -0.0566  | 0.147  |
| graza.     | 0   | 0.82 | 0.604   | 0.865(144)  | 0.879(66)    | -0.185   | 0.356  |
| greek.     | 0   | 0.86 | 0.418   | 0.923(186)  | 0.940(87)    | -0.334   | 0.413  |
| norgs.     | 0   | 0.84 | 0.858   | 0.871(101)  | 0.887(315)   | -0.0502  | 0.281  |
| noroe.     | 0   | 0.83 | 0.541   | 0.904(313)  | 0.892(4367)  | 0.0966   | 0.158  |

0 0.80 2.45e-08 0.882(41917) 0.890(371549) -0.096 0.0172

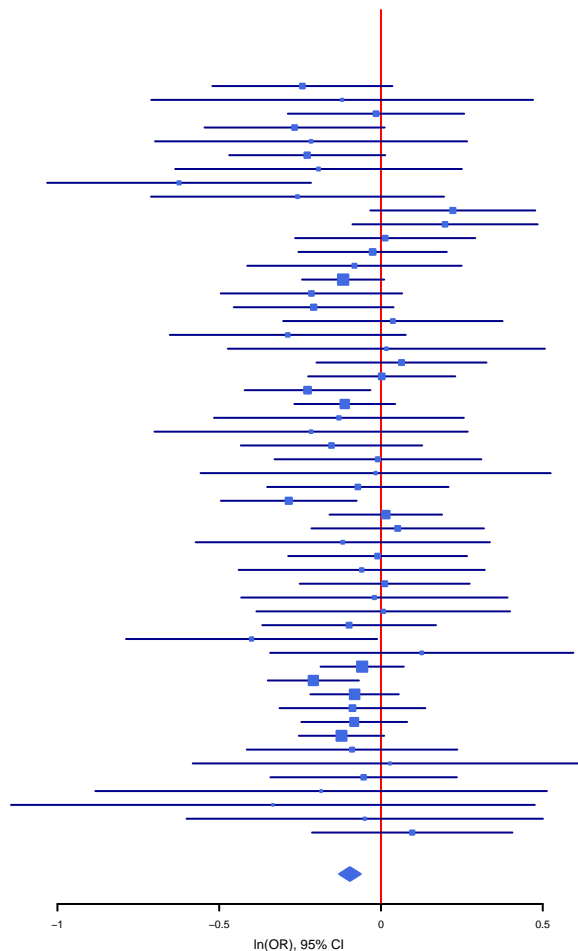

| rs62581014       |      | C/T     |         | 9:141066490 |               | 0.845   | het_l: | 0.0 |  |
|------------------|------|---------|---------|-------------|---------------|---------|--------|-----|--|
|                  |      | het_P:  |         |             |               |         |        |     |  |
| ngt              | info | p_value | f_ca(n) | f_co(n)     | ln(OR)        | STDerr  |        |     |  |
| bmau.            | 0    | 0.63    | 0.55    | 0.636(329)  | 0.628(1810)   | 0.0663  | 0.111  |     |  |
| bmj2.            | 0    | 0.95    | 0.675   | 0.602(181)  | 0.619(478)    | -0.0696 | 0.166  |     |  |
| bmj3.            | 0    | 0.60    | 0.791   | 0.622(489)  | 0.611(880)    | 0.0288  | 0.108  |     |  |
| bmjpo.           | 0    | 0.47    | 0.0996  | 0.642(410)  | 0.660(689)    | -0.24   | 0.146  |     |  |
| bmsp.            | 0    | 0.70    | 0.979   | 0.581(253)  | 0.574(291)    | 0.00419 | 0.163  |     |  |
| bonn.            | 0    | 0.62    | 0.745   | 0.635(669)  | 0.628(1246)   | 0.0299  | 0.0922 |     |  |
| but.             | 0    | 0.90    | 0.626   | 0.558(236)  | 0.622(366)    | -0.285  | 0.141  |     |  |
| dub1.            | 0    | 0.92    | 0.773   | 0.622(450)  | 0.633(796)    | -0.0395 | 0.137  |     |  |
| ed1.             | 0    | 0.56    | 0.142   | 0.592(275)  | 0.625(272)    | -0.258  | 0.176  |     |  |
| fat2.            | 0    | 0.60    | 0.0689  | 0.603(722)  | 0.637(1027)   | -0.171  | 0.0938 |     |  |
| fran.            | 0    | 0.48    | 0.035   | 0.573(451)  | 0.605(1630)   | -0.237  | 0.113  |     |  |
| gain.            | 0    | 0.87    | 0.516   | 0.589(706)  | 0.608(593)    | -0.0565 | 0.087  |     |  |
| gsk1.            | 0    | 0.76    | 0.148   | 0.606(706)  | 0.626(899)    | -0.122  | 0.0844 |     |  |
| hal2.            | 0    | 0.79    | 0.147   | 0.596(410)  | 0.616(479)    | -0.165  | 0.114  |     |  |
| icuk.            | 0    | 0.74    | 0.0955  | 0.610(2456) | 0.624(4089)   | -0.073  | 0.0438 |     |  |
| jst5.            | 0    | 0.79    | 0.22    | 0.602(646)  | 0.624(643)    | -0.114  | 0.0926 |     |  |
| may1.            | 0    | 0.77    | 0.781   | 0.620(929)  | 0.628(759)    | -0.0233 | 0.0839 |     |  |
| mich.            | 0    | 0.64    | 0.642   | 0.608(481)  | 0.597(399)    | 0.058   | 0.125  |     |  |
| pf1e.            | 0    | 0.80    | 0.707   | 0.628(375)  | 0.622(346)    | 0.0473  | 0.126  |     |  |
| rom3.            | 0    | 0.79    | 0.903   | 0.582(233)  | 0.583(198)    | -0.02   | 0.164  |     |  |
| stzc.            | 0    | 0.11    | 0.158   | 0.624(628)  | 0.636(1219)   | -0.309  | 0.219  |     |  |
| swa2.            | 0    | 0.58    | 0.489   | 0.640(685)  | 0.632(2252)   | -0.0351 | 0.0613 |     |  |
| swei.            | 0    | 0.77    | 0.638   | 0.647(1278) | 0.653(3669)   | -0.0264 | 0.0562 |     |  |
| top7.            | 0    | 0.94    | 0.687   | 0.643(416)  | 0.646(350)    | -0.047  | 0.117  |     |  |
| top8.            | 0    | 0.79    | 0.277   | 0.630(148)  | 0.668(291)    | -0.187  | 0.172  |     |  |
| ucl2.            | 0    | 0.78    | 0.418   | 0.618(726)  | 0.627(693)    | -0.0718 | 0.0896 |     |  |
| uclo.            | 0    | 0.55    | 0.685   | 0.618(427)  | 0.630(488)    | -0.0545 | 0.134  |     |  |
| uktr.            | 0    | 0.91    | 0.617   | 0.627(130)  | 0.647(130)    | -0.0961 | 0.192  |     |  |
| ume4.            | 0    | 0.86    | 0.377   | 0.670(565)  | 0.684(569)    | -0.0861 | 0.0975 |     |  |
| usc2.            | 0    | 0.83    | 0.469   | 0.596(1293) | 0.607(1156)   | -0.0485 | 0.0669 |     |  |
| wtc.             | 0    | 0.42    | 0.272   | 0.632(1644) | 0.625(1641)   | 0.0885  | 0.0805 |     |  |
| jea2.            | 0    | 0.48    | 0.0393  | 0.634(372)  | 0.664(628)    | -0.294  | 0.143  |     |  |
| kfo4.            | 0    | 0.62    | 0.16    | 0.582(247)  | 0.616(288)    | -0.238  | 0.169  |     |  |
| tgco2.           | 0    | 0.86    | 0.346   | 0.607(1032) | 0.625(499)    | -0.0815 | 0.0865 |     |  |
| bdtrs.           | 0    | 0.59    | 0.392   | 0.623(218)  | 0.640(684)    | -0.129  | 0.15   |     |  |
| dutch.           | 0    | 0.77    | 0.0122  | 0.607(831)  | 0.643(953)    | -0.202  | 0.0804 |     |  |
| gawil.           | 0    | 0.72    | 0.610   | 0.610(268)  | 0.612(2502)   | -0.0328 | 0.132  |     |  |
| germ1.           | 0    | 0.69    | 0.159   | 0.593(219)  | 0.638(992)    | -0.189  | 0.134  |     |  |
| gpw1.            | 0    | 0.57    | 0.142   | 0.597(447)  | 0.616(2092)   | -0.147  | 0.1    |     |  |
| neuc1.           | 0    | 0.69    | 0.807   | 0.624(215)  | 0.621(750)    | 0.0341  | 0.14   |     |  |
| spsp3.           | 0    | 0.57    | 0.418   | 0.580(153)  | 0.598(2337)   | -0.13   | 0.161  |     |  |
| swed1.           | 0    | 0.75    | 0.457   | 0.649(2909) | 0.643(2844)   | 0.0342  | 0.046  |     |  |
| ukwa1.           | 0    | 0.75    | 0.195   | 0.616(2789) | 0.628(2372)   | -0.0618 | 0.0477 |     |  |
| usaw4.           | 0    | 0.59    | 0.481   | 0.637(2956) | 0.603(2930)   | -0.0535 | 0.0486 |     |  |
| usaw5.           | 0    | 0.57    | 0.565   | 0.611(1107) | 0.604(1316)   | -0.0475 | 0.0827 |     |  |
| deCODE.          | 0    | 0.99    | 0.00934 | 0.626(1972) | 0.626(192602) | -0.0908 | 0.0349 |     |  |
| EstonianBiobank. | 1    | 0.93    | 0.0931  | 0.670(407)  | 0.698(17209)  | -0.13   | 0.0776 |     |  |
| HUNT.            | 0    | 0.54    | 0.269   | 0.646(905)  | 0.656(41914)  | -0.0758 | 0.0685 |     |  |
| iPSYCH.          | 0    | 0.48    | 0.438   | 0.626(1758) | 0.631(5937)   | -0.0443 | 0.0571 |     |  |
| bmrom.           | 0    | 0.78    | 0.226   | 0.592(225)  | 0.639(121)    | -0.231  | 0.191  |     |  |
| bmrus.           | 0    | 0.78    | 0.934   | 0.658(522)  | 0.652(460)    | 0.00916 | 0.111  |     |  |
| graza.           | 0    | 0.83    | 0.192   | 0.574(144)  | 0.643(66)     | -0.321  | 0.246  |     |  |
| greek.           | 0    | 0.82    | 0.601   | 0.670(186)  | 0.688(87)     | -0.115  | 0.221  |     |  |
| norgs.           | 0    | 0.75    | 0.779   | 0.637(101)  | 0.641(315)    | -0.0573 | 0.205  |     |  |
| noroe.           | 0    | 0.76    | 0.164   | 0.668(313)  | 0.651(4367)   | 0.145   | 0.105  |     |  |

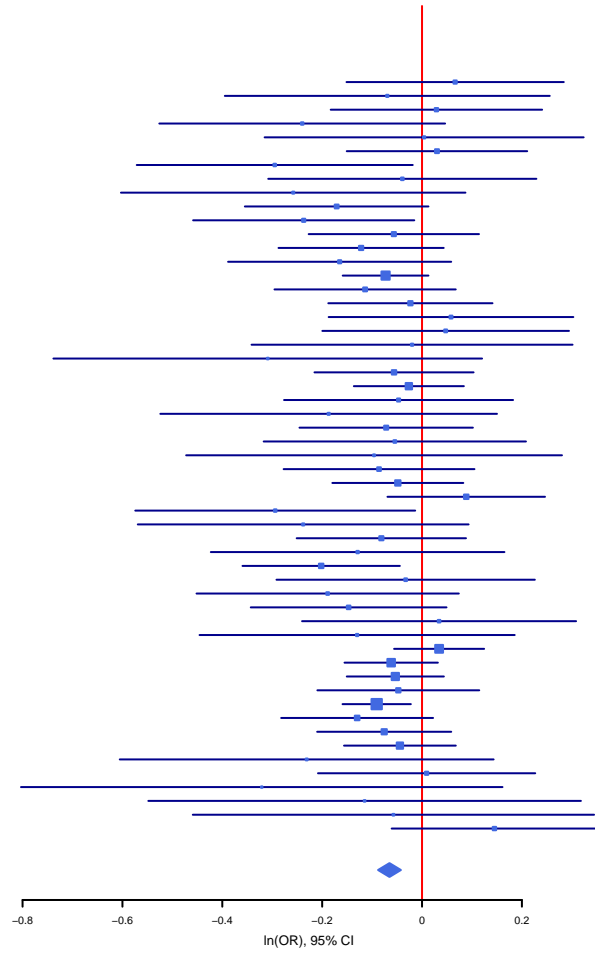

**1 0.69 2.77e-08 0.620(41917) 0.634(371549) -0.0652 0.0117**

rs1998820

T/A

10:18751103

het\_P:

0.255

het\_I:

10.5

|                  | ngt      | info        | p_value        | f_ca(n)             | f_co(n)              | ln(OR)        | STDerr        |
|------------------|----------|-------------|----------------|---------------------|----------------------|---------------|---------------|
| bmau.            | 0        | 0.98        | 0.664          | 0.894(329)          | 0.887(1810)          | 0.0605        | 0.139         |
| bmng2.           | 0        | 0.94        | 0.0707         | 0.921(181)          | 0.885(478)           | 0.522         | 0.289         |
| bmng3.           | 0        | 0.99        | 0.308          | 0.905(489)          | 0.891(880)           | 0.14          | 0.137         |
| bmmpo.           | 0        | 1.01        | 0.162          | 0.924(410)          | 0.898(689)           | 0.238         | 0.17          |
| bmmsp.           | 0        | 0.97        | 0.62           | 0.908(253)          | 0.912(291)           | 0.12          | 0.243         |
| bonn.            | 0        | 0.96        | 0.211          | 0.913(669)          | 0.896(1246)          | 0.153         | 0.222         |
| butr.            | 0        | 0.98        | 0.7            | 0.916(236)          | 0.909(236)           | 0.0896        | 0.233         |
| dub1.            | 1        | 1.05        | 0.945          | 0.903(1150)         | 0.886(796)           | 0.197         | 0.206         |
| edc1.            | 1        | 0.96        | 0.776          | 0.896(275)          | 0.891(272)           | -0.0595       | 0.21          |
| fat2.            | 0        | 1.00        | 0.358          | 0.899(722)          | 0.887(1027)          | 0.104         | 0.114         |
| fran.            | 0        | 0.94        | 0.69           | 0.894(451)          | 0.899(1630)          | -0.0513       | 0.129         |
| gain.            | 1        | 0.97        | 0.0609         | 0.907(706)          | 0.883(593)           | 0.247         | 0.132         |
| gsk1.            | 0        | 1.03        | 0.189          | 0.909(706)          | 0.895(899)           | 0.157         | 0.12          |
| hal2.            | 0        | 0.96        | 0.047          | 0.903(410)          | 0.877(479)           | 0.325         | 0.164         |
| icuk.            | 0        | 1.02        | 0.443          | 0.892(2456)         | 0.887(4069)          | 0.0443        | 0.0578        |
| js15.            | 0        | 0.94        | 0.324          | 0.901(646)          | 0.888(643)           | 0.132         | 0.134         |
| may1.            | 0        | 0.99        | 0.714          | 0.898(929)          | 0.894(759)           | 0.0428        | 0.117         |
| mich.            | 0        | 1.00        | 0.403          | 0.910(481)          | 0.901(399)           | 0.138         | 0.165         |
| pf1e.            | 0        | 0.95        | 0.0696         | 0.879(375)          | 0.906(346)           | -0.332        | 0.183         |
| rom3.            | 0        | 1.00        | 0.743          | 0.901(233)          | 0.911(198)           | -0.0812       | 0.248         |
| st2c.            | 0        | 1.04        | 0.275          | 0.895(628)          | 0.902(1219)          | -0.129        | 0.119         |
| stp1.            | 1        | 1.04        | 0.792          | 0.898(920)          | 0.896(973)           | 0.0281        | 0.106         |
| swa2.            | 0        | 1.00        | 0.324          | 0.903(895)          | 0.893(2252)          | 0.068         | 0.0943        |
| swei.            | 0        | 1.00        | 0.0472         | 0.906(1278)         | 0.890(3669)          | 0.156         | 0.0789        |
| top7.            | 1        | 0.98        | 0.72           | 0.903(416)          | 0.903(350)           | -0.067        | 0.187         |
| top8.            | 0        | 0.97        | 0.581          | 0.878(148)          | 0.899(291)           | -0.131        | 0.237         |
| ucl2.            | 0        | 0.98        | 0.0276         | 0.912(726)          | 0.887(693)           | 0.283         | 0.128         |
| ucl0.            | 1        | 1.00        | 0.269          | 0.896(427)          | 0.882(488)           | 0.168         | 0.152         |
| uktr.            | 0        | 0.96        | 0.24           | 0.913(130)          | 0.882(130)           | 0.351         | 0.299         |
| ume4.            | 0        | 0.97        | 0.683          | 0.898(565)          | 0.893(569)           | -0.056        | 0.137         |
| usc2.            | 0        | 0.99        | 0.53           | 0.908(1293)         | 0.914(1156)          | -0.0659       | 0.105         |
| wloc.            | 1        | 0.99        | 0.449          | 0.894(1644)         | 0.888(1641)          | 0.0618        | 0.0815        |
| jea2.            | 0        | 0.98        | 0.0179         | 0.911(372)          | 0.878(628)           | 0.377         | 0.159         |
| kfo4.            | 0        | 0.97        | 0.842          | 0.895(247)          | 0.897(288)           | 0.0437        | 0.219         |
| tgco2.           | 0        | 1.01        | 0.0327         | 0.906(1032)         | 0.881(499)           | 0.266         | 0.124         |
| bdtrs.           | 0        | 1.05        | 0.487          | 0.907(218)          | 0.894(684)           | 0.131         | 0.188         |
| dutch.           | 0        | 1.04        | 0.479          | 0.893(831)          | 0.881(953)           | 0.0746        | 0.105         |
| gawil.           | 0        | 0.99        | 0.152          | 0.904(2568)         | 0.890(2502)          | 0.268         | 0.187         |
| germ1.           | 0        | 0.96        | 0.293          | 0.911(219)          | 0.896(992)           | 0.202         | 0.193         |
| gpcw1.           | 0        | 0.99        | 0.39           | 0.902(447)          | 0.892(2092)          | 0.107         | 0.124         |
| neuc1.           | 0        | 0.95        | 0.641          | 0.889(215)          | 0.895(750)           | -0.085        | 0.182         |
| spsp3.           | 0        | 0.96        | 0.11           | 0.931(153)          | 0.903(2337)          | 0.379         | 0.237         |
| swed1.           | 0        | 1.02        | 0.12           | 0.900(2909)         | 0.891(2844)          | 0.0854        | 0.0613        |
| ukwa1.           | 0        | 0.99        | 0.503          | 0.896(2789)         | 0.890(2372)          | 0.0433        | 0.0646        |
| usaw4.           | 0        | 0.97        | 0.324          | 0.904(2568)         | 0.899(2930)          | 0.0623        | 0.0632        |
| usaw5.           | 0        | 1.00        | 0.0332         | 0.889(1107)         | 0.909(1316)          | -0.213        | 0.1           |
| deCODE.          | 0        | 1.00        | 0.145          | 0.886(1972)         | 0.886(192602)        | 0.078         | 0.0536        |
| EstonianBiobank. | 1        | 1.00        | 0.802          | 0.867(407)          | 0.873(17209)         | -0.0264       | 0.105         |
| HUNT.            | 0        | 0.99        | 0.00739        | 0.906(905)          | 0.884(41914)         | 0.203         | 0.0756        |
| iPSYCH.          | 0        | 1.01        | 0.0226         | 0.899(1758)         | 0.886(5937)          | 0.144         | 0.0631        |
| UKBiobank.       | 0        | 1.00        | 0.124          | 0.897(1454)         | 0.887(58113)         | 0.294         | 0.191         |
| bmrom.           | 0        | 1.00        | 0.936          | 0.905(125)          | 0.905(121)           | 0.026         | 0.283         |
| bmrus.           | 0        | 0.97        | 0.0765         | 0.905(522)          | 0.882(460)           | 0.269         | 0.152         |
| graza.           | 0        | 1.01        | 0.162          | 0.920(144)          | 0.878(66)            | 0.489         | 0.349         |
| greek.           | 0        | 0.96        | 0.66           | 0.919(186)          | 0.925(87)            | -0.16         | 0.364         |
| norgs.           | 0        | 1.05        | 0.0398         | 0.866(101)          | 0.911(315)           | -0.54         | 0.263         |
| noroe.           | 0        | 1.00        | 0.917          | 0.890(313)          | 0.888(4367)          | -0.0142       | 0.136         |
|                  | <b>9</b> | <b>0.99</b> | <b>4.1e-08</b> | <b>0.899(41917)</b> | <b>0.886(371549)</b> | <b>0.0837</b> | <b>0.0152</b> |

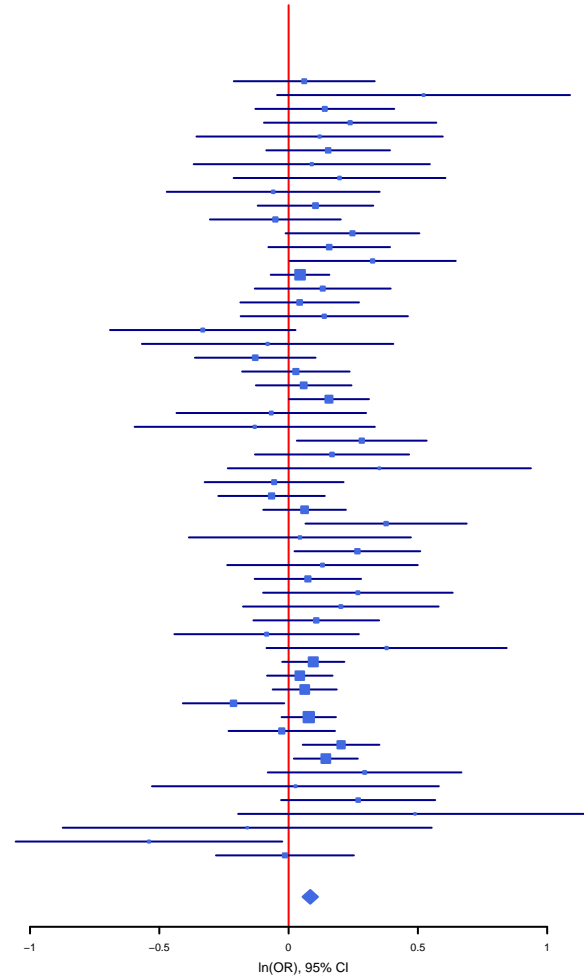

rs10994415

T/C

10:62322034

0.00364

het\_P:

het\_l: 37.2

|                  | ngt         | info            | p_value             | f_ca(n)              | f_co(n)       | ln(OR)        | STDerr |
|------------------|-------------|-----------------|---------------------|----------------------|---------------|---------------|--------|
| bmau.            | 0           | 1.00            | 0.832               | 0.919(329)           | 0.917(1810)   | 0.033         | 0.155  |
| bmg2.            | 1           | 1.00            | 0.72                | 0.914(181)           | 0.911(478)    | -0.0957       | 0.267  |
| bmg3.            | 0           | 1.06            | 0.712               | 0.899(489)           | 0.904(880)    | -0.049        | 0.133  |
| bmpo.            | 0           | 0.99            | 0.0284              | 0.868(410)           | 0.897(689)    | -0.323        | 0.147  |
| bmsp.            | 0           | 1.07            | 0.334               | 0.939(253)           | 0.962(291)    | -0.297        | 0.308  |
| bonn.            | 0           | 0.99            | 0.0238              | 0.908(669)           | 0.925(1246)   | -0.284        | 0.126  |
| butr.            | 0           | 1.08            | 0.054               | 0.909(236)           | 0.945(236)    | -0.507        | 0.251  |
| dub1.            | 0           | 1.04            | 0.37                | 0.917(150)           | 0.935(796)    | -0.206        | 0.229  |
| ed1.             | 0           | 0.95            | 0.00465             | 0.910(275)           | 0.956(272)    | -0.783        | 0.277  |
| fat2.            | 0           | 0.95            | 0.283               | 0.926(722)           | 0.919(1027)   | 0.145         | 0.135  |
| fran.            | 0           | 1.01            | 0.461               | 0.924(451)           | 0.929(1630)   | -0.107        | 0.145  |
| gain.            | 0           | 1.01            | 0.276               | 0.924(706)           | 0.936(593)    | -0.169        | 0.155  |
| gsk1.            | 0           | 0.96            | 0.11                | 0.909(706)           | 0.924(899)    | -0.211        | 0.132  |
| hal2.            | 0           | 0.99            | 0.0154              | 0.910(410)           | 0.933(479)    | -0.456        | 0.188  |
| icuk.            | 0           | 1.01            | 0.0588              | 0.915(2456)          | 0.925(4089)   | -0.126        | 0.0667 |
| jst5.            | 0           | 1.01            | 0.0372              | 0.932(646)           | 0.911(643)    | 0.31          | 0.149  |
| may1.            | 0           | 0.98            | 0.888               | 0.918(929)           | 0.919(759)    | -0.0185       | 0.132  |
| mich.            | 0           | 0.98            | 0.0168              | 0.908(481)           | 0.939(399)    | -0.455        | 0.19   |
| pf1e.            | 0           | 1.02            | 0.309               | 0.917(375)           | 0.932(346)    | -0.209        | 0.205  |
| rom3.            | 0           | 0.96            | 0.279               | 0.886(233)           | 0.912(198)    | -0.27         | 0.249  |
| stzc.            | 0           | 0.98            | 0.748               | 0.927(528)           | 0.928(1219)   | 0.0457        | 0.142  |
| stp1.            | 1           | 1.00            | 0.0588              | 0.908(929)           | 0.924(919)    | -0.279        | 0.129  |
| swa2.            | 0           | 0.98            | 0.537               | 0.898(885)           | 0.901(2252)   | -0.0608       | 0.0986 |
| swei.            | 0           | 1.01            | 0.642               | 0.907(1278)          | 0.911(3669)   | -0.0375       | 0.0806 |
| top7.            | 0           | 1.00            | 0.419               | 0.913(416)           | 0.925(350)    | -0.162        | 0.201  |
| top8.            | 0           | 1.04            | 0.0837              | 0.912(148)           | 0.943(291)    | -0.482        | 0.279  |
| uc12.            | 0           | 1.05            | 0.843               | 0.921(726)           | 0.919(693)    | 0.0271        | 0.136  |
| uclo.            | 0           | 0.98            | 0.0045              | 0.905(427)           | 0.942(488)    | -0.529        | 0.186  |
| ukr.             | 0           | 1.05            | 0.175               | 0.931(130)           | 0.898(130)    | 0.424         | 0.312  |
| ume4.            | 0           | 1.03            | 0.939               | 0.922(565)           | 0.923(569)    | -0.012        | 0.156  |
| usc2.            | 0           | 1.00            | 0.776               | 0.911(1293)          | 0.910(1156)   | -0.0298       | 0.105  |
| wtcc.            | 0           | 1.02            | 0.0461              | 0.912(1644)          | 0.929(1641)   | -0.186        | 0.0934 |
| jea2.            | 0           | 1.05            | 0.395               | 0.876(372)           | 0.860(628)    | 0.117         | 0.137  |
| kfo4.            | 0           | 0.98            | 0.00939             | 0.898(247)           | 0.937(288)    | -0.64         | 0.247  |
| tgco2.           | 0           | 0.98            | 0.906               | 0.922(1032)          | 0.923(499)    | -0.0175       | 0.148  |
| bdtrs.           | 0           | 1.00            | 0.0213              | 0.890(218)           | 0.918(684)    | -0.431        | 0.187  |
| dutch.           | 0           | 1.02            | 0.555               | 0.922(631)           | 0.917(953)    | 0.0733        | 0.124  |
| gawli.           | 0           | 1.00            | 0.923               | 0.917(268)           | 0.914(502)    | 0.0189        | 0.196  |
| germ1.           | 0           | 0.99            | 0.00952             | 0.896(219)           | 0.931(992)    | -0.488        | 0.188  |
| gpcw1.           | 0           | 0.97            | 0.9                 | 0.927(447)           | 0.927(2092)   | 0.0181        | 0.145  |
| neuc1.           | 0           | 0.98            | 0.859               | 0.920(215)           | 0.917(750)    | -0.0367       | 0.207  |
| spsp3.           | 0           | 0.94            | 0.548               | 0.938(153)           | 0.945(2337)   | -0.154        | 0.256  |
| swed1.           | 0           | 1.01            | 0.0314              | 0.896(2909)          | 0.908(2844)   | -0.137        | 0.0634 |
| ukwat1.          | 1           | 1.00            | 0.286               | 0.922(831)           | 0.927(2789)   | -0.0843       | 0.0757 |
| usaw4.           | 0           | 0.97            | 0.477               | 0.924(2956)          | 0.928(2930)   | -0.0511       | 0.0718 |
| usaw5.           | 0           | 0.98            | 0.68                | 0.923(1107)          | 0.926(1316)   | -0.0473       | 0.115  |
| EstonianBiobank. | 1           | 1.00            | 0.000199            | 0.834(407)           | 0.878(17209)  | -0.36         | 0.0967 |
| HUNT.            | 0           | 1.00            | 0.102               | 0.908(905)           | 0.920(41914)  | -0.145        | 0.0884 |
| iPSYCH.          | 0           | 1.00            | 0.371               | 0.916(1758)          | 0.921(5937)   | -0.0623       | 0.0696 |
| UKBiobank.       | 0           | 1.00            | 0.651               | 0.922(1454)          | 0.925(58113)  | -0.0772       | 0.171  |
| bmom.            | 0           | 0.92            | 0.264               | 0.913(225)           | 0.880(121)    | 0.51          | 0.278  |
| bmrus.           | 1           | 1.00            | 0.046               | 0.864(522)           | 0.890(460)    | -0.281        | 0.141  |
| graza.           | 1           | 1.01            | 0.0392              | 0.889(144)           | 0.955(66)     | -0.969        | 0.47   |
| norgs.           | 1           | 1.02            | 0.119               | 0.886(101)           | 0.917(315)    | -0.435        | 0.279  |
| noroe.           | 0           | 1.00            | 0.349               | 0.894(313)           | 0.912(4367)   | -0.133        | 0.142  |
| <b>4</b>         | <b>1.00</b> | <b>1.14e-11</b> | <b>0.912(41917)</b> | <b>0.918(371549)</b> | <b>-0.118</b> | <b>0.0174</b> |        |

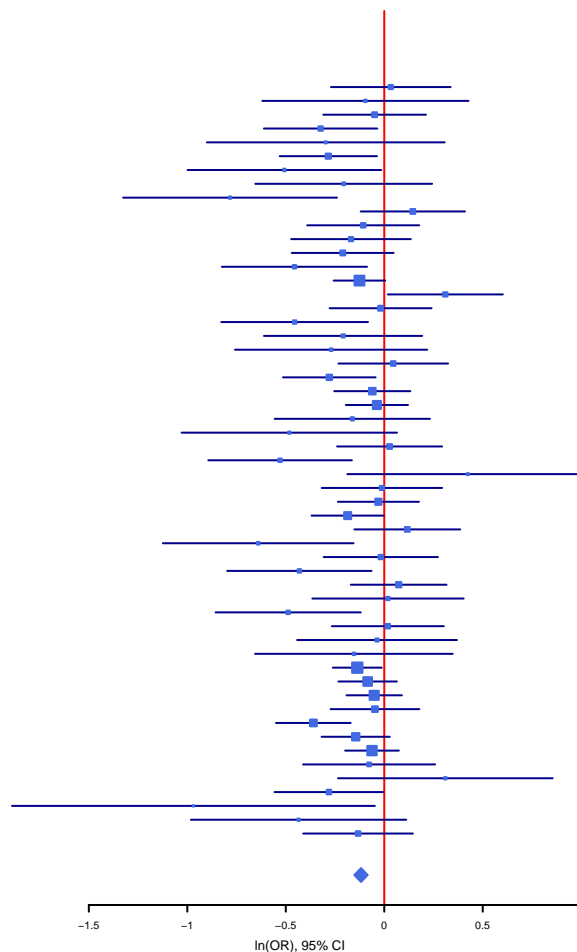

rs10761661

C/T

10:64525135

het\_P:

0.472

het\_I:

0.1

|                  | ngt      | info        | p_value         | f_ca(n)             | f_co(n)              | ln(OR)         | STDerr        |
|------------------|----------|-------------|-----------------|---------------------|----------------------|----------------|---------------|
| bmau.            | 0        | 1.04        | 0.977           | 0.519(329)          | 0.525(1810)          | -0.0024        | 0.0834        |
| bm2g.            | 0        | 0.99        | 0.724           | 0.600(181)          | 0.566(478)           | 0.0561         | 0.159         |
| bm3.             | 0        | 0.91        | 0.0176          | 0.543(489)          | 0.591(880)           | -0.206         | 0.0869        |
| bmpp.            | 0        | 0.96        | 0.0786          | 0.556(410)          | 0.593(689)           | -0.174         | 0.0986        |
| bmsp.            | 0        | 0.95        | 0.167           | 0.596(253)          | 0.569(291)           | 0.198          | 0.143         |
| bonn.            | 0        | 1.02        | 0.443           | 0.566(669)          | 0.569(1246)          | -0.0536        | 0.0699        |
| butr.            | 0        | 0.99        | 0.73            | 0.591(236)          | 0.602(236)           | -0.046         | 0.134         |
| dub1.            | 0        | 1.04        | 0.907           | 0.498(150)          | 0.498(796)           | -0.024         | 0.24          |
| edf1.            | 0        | 0.96        | 0.839           | 0.546(275)          | 0.542(272)           | 0.0264         | 0.13          |
| fat2.            | 0        | 0.99        | 0.104           | 0.544(722)          | 0.569(1027)          | -0.115         | 0.0709        |
| fran.            | 0        | 0.99        | 0.867           | 0.562(451)          | 0.551(1630)          | 0.013          | 0.0778        |
| gain.            | 0        | 1.00        | 0.818           | 0.559(706)          | 0.563(593)           | -0.0184        | 0.0799        |
| gsk1.            | 0        | 1.00        | 0.532           | 0.536(706)          | 0.549(899)           | -0.0449        | 0.0719        |
| hal2.            | 0        | 1.01        | 0.511           | 0.557(410)          | 0.570(479)           | -0.0658        | 0.1           |
| icuk.            | 0        | 0.96        | 0.00228         | 0.526(2456)         | 0.553(4069)          | -0.115         | 0.0375        |
| js15.            | 0        | 0.97        | 0.993           | 0.537(646)          | 0.535(643)           | 0.0007         | 0.0812        |
| may1.            | 0        | 1.00        | 0.588           | 0.555(929)          | 0.545(759)           | 0.0391         | 0.0721        |
| mich.            | 0        | 0.97        | 0.806           | 0.553(481)          | 0.555(399)           | 0.0244         | 0.0996        |
| pf1e.            | 0        | 1.03        | 0.245           | 0.570(375)          | 0.541(346)           | 0.125          | 0.108         |
| rom3.            | 0        | 1.00        | 0.795           | 0.603(233)          | 0.593(198)           | 0.0381         | 0.146         |
| si2c.            | 0        | 0.98        | 0.616           | 0.556(628)          | 0.556(1219)          | -0.0373        | 0.0743        |
| stp1.            | 0        | 1.02        | 0.0243          | 0.519(920)          | 0.563(973)           | -0.149         | 0.066         |
| swa2.            | 0        | 0.99        | 0.99            | 0.527(895)          | 0.527(2252)          | -0.024         | 0.0582        |
| swei.            | 0        | 0.99        | 0.158           | 0.510(1278)         | 0.521(3669)          | -0.0667        | 0.0472        |
| top7.            | 0        | 0.98        | 0.78            | 0.535(416)          | 0.554(350)           | -0.0307        | 0.11          |
| top8.            | 0        | 0.94        | 0.479           | 0.534(148)          | 0.543(291)           | -0.109         | 0.153         |
| ucl2.            | 0        | 1.04        | 0.369           | 0.551(726)          | 0.564(693)           | -0.0673        | 0.0749        |
| uclo.            | 0        | 1.01        | 0.973           | 0.524(427)          | 0.534(488)           | -0.00321       | 0.0951        |
| uktr.            | 0        | 1.07        | 0.767           | 0.527(130)          | 0.540(130)           | -0.0503        | 0.17          |
| umr4.            | 0        | 1.02        | 0.293           | 0.516(565)          | 0.542(569)           | -0.0896        | 0.0844        |
| usc2.            | 0        | 1.03        | 0.583           | 0.566(1293)         | 0.572(1156)          | -0.0321        | 0.0586        |
| wlcc.            | 0        | 1.02        | 0.83            | 0.551(1644)         | 0.553(1641)          | 0.0108         | 0.0503        |
| jea2.            | 0        | 0.94        | 0.0743          | 0.566(372)          | 0.604(628)           | -0.176         | 0.0988        |
| kfo4.            | 0        | 1.03        | 0.628           | 0.581(247)          | 0.563(288)           | 0.0634         | 0.131         |
| tgco2.           | 0        | 0.97        | 0.519           | 0.549(1032)         | 0.533(499)           | 0.0514         | 0.0796        |
| bdrs.            | 0        | 1.01        | 0.0775          | 0.541(218)          | 0.582(684)           | -0.2           | 0.113         |
| dutch.           | 0        | 1.01        | 0.404           | 0.557(831)          | 0.571(953)           | -0.0569        | 0.0693        |
| gaw1.            | 0        | 1.01        | 0.949           | 0.583(268)          | 0.585(502)           | -0.00713       | 0.11          |
| germ1.           | 0        | 1.00        | 0.853           | 0.585(219)          | 0.580(992)           | 0.0204         | 0.11          |
| gpcw1.           | 0        | 1.01        | 0.0866          | 0.538(447)          | 0.569(2092)          | -0.127         | 0.0741        |
| neuc1.           | 0        | 1.01        | 0.874           | 0.546(215)          | 0.548(750)           | -0.0176        | 0.11          |
| spsp3.           | 0        | 0.96        | 0.00534         | 0.512(153)          | 0.593(2337)          | -0.34          | 0.122         |
| swed1.           | 0        | 0.99        | 0.16            | 0.514(2909)         | 0.529(2844)          | -0.0534        | 0.038         |
| ukwa1.           | 0        | 1.00        | 0.0125          | 0.525(2789)         | 0.553(2372)          | -0.1           | 0.0402        |
| usa4.            | 0        | 1.01        | 0.172           | 0.553(2956)         | 0.543(2930)          | 0.051          | 0.073         |
| usa5.            | 0        | 0.99        | 0.607           | 0.561(1107)         | 0.551(1316)          | 0.0316         | 0.0613        |
| deCODE.          | 0        | 1.00        | 0.0262          | 0.509(1972)         | 0.509(192602)        | -0.0742        | 0.0334        |
| EstonianBiobank. | 1        | 0.99        | 0.135           | 0.541(407)          | 0.573(17209)         | -0.107         | 0.0716        |
| HUNT.            | 0        | 1.00        | 0.00452         | 0.496(905)          | 0.532(41914)         | -0.137         | 0.0482        |
| iPSYCH.          | 0        | 1.00        | 0.303           | 0.533(1758)         | 0.542(5937)          | -0.0398        | 0.0386        |
| UKBiobank.       | 0        | 1.00        | 0.0764          | 0.535(1454)         | 0.552(58113)         | -0.304         | 0.171         |
| bmron.           | 0        | 0.95        | 0.95            | 0.622(225)          | 0.622(225)           | 0.00844        | 0.173         |
| bmrus.           | 0        | 0.96        | 0.918           | 0.581(522)          | 0.590(460)           | -0.00975       | 0.0953        |
| graza.           | 0        | 0.89        | 0.636           | 0.622(144)          | 0.643(66)            | -0.112         | 0.236         |
| greek.           | 0        | 0.97        | 0.662           | 0.616(186)          | 0.594(87)            | 0.084          | 0.192         |
| norgs.           | 0        | 1.03        | 0.839           | 0.529(101)          | 0.526(315)           | -0.0345        | 0.17          |
| noroe.           | 0        | 1.01        | 0.683           | 0.542(313)          | 0.516(4367)          | 0.0349         | 0.0855        |
|                  | <b>1</b> | <b>0.99</b> | <b>4.65e-08</b> | <b>0.540(41917)</b> | <b>0.528(371549)</b> | <b>-0.0512</b> | <b>0.0094</b> |

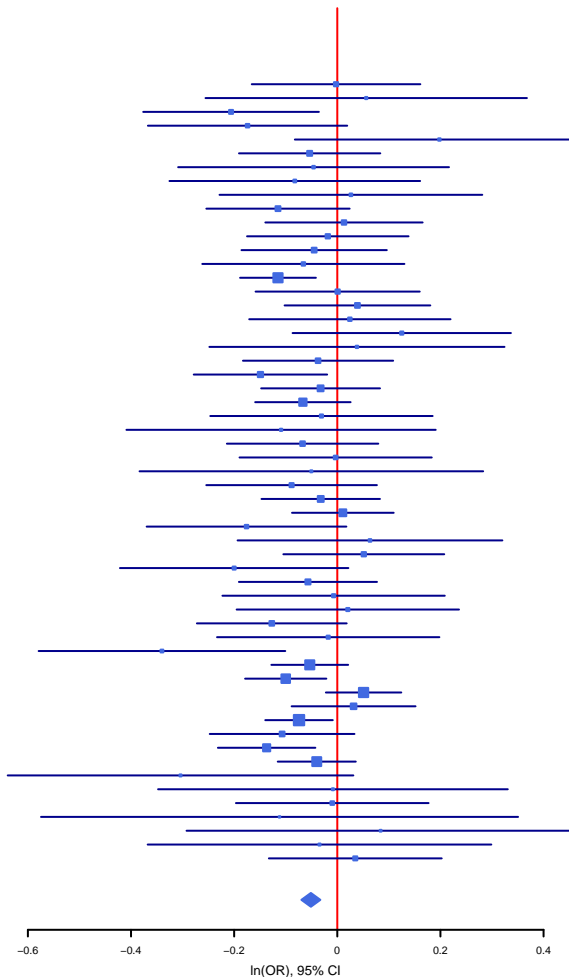

rs2273738

C/T

10:11648659

het\_P:

0.417

het\_I:

2.7

|                  | ngt | info | p_value  | f_ca(n)     | f_co(n)       | ln(OR)  | STDerr |
|------------------|-----|------|----------|-------------|---------------|---------|--------|
| bmau.            | 0   | 0.96 | 0.601    | 0.854(329)  | 0.849(1810)   | 0.0645  | 0.123  |
| bm2.             | 0   | 1.00 | 0.945    | 0.858(181)  | 0.873(478)    | 0.0158  | 0.23   |
| bm3.             | 0   | 0.99 | 0.264    | 0.839(489)  | 0.846(880)    | -0.126  | 0.113  |
| bmpo.            | 0   | 0.94 | 0.682    | 0.843(410)  | 0.859(689)    | -0.0566 | 0.138  |
| bmsp.            | 0   | 1.03 | 0.323    | 0.831(253)  | 0.848(291)    | -0.182  | 0.184  |
| bonn.            | 0   | 0.95 | 0.178    | 0.826(669)  | 0.850(1246)   | -0.13   | 0.0967 |
| butr.            | 0   | 1.02 | 0.883    | 0.817(236)  | 0.821(236)    | -0.0246 | 0.167  |
| club1.           | 0   | 0.96 | 0.285    | 0.845(150)  | 0.845(150)    | -0.0363 | 0.177  |
| edl1.            | 0   | 0.97 | 0.52     | 0.844(275)  | 0.863(272)    | -0.117  | 0.182  |
| fat2.            | 0   | 0.95 | 0.638    | 0.843(722)  | 0.854(1027)   | -0.0472 | 0.1    |
| fran.            | 0   | 0.92 | 0.0464   | 0.826(451)  | 0.852(1630)   | -0.212  | 0.107  |
| gain.            | 0   | 0.92 | 0.511    | 0.857(706)  | 0.868(593)    | -0.0793 | 0.12   |
| gsk1.            | 0   | 0.96 | 0.697    | 0.850(706)  | 0.854(899)    | -0.04   | 0.103  |
| hal2.            | 0   | 1.02 | 0.0754   | 0.808(410)  | 0.844(479)    | -0.232  | 0.131  |
| icuk.            | 0   | 0.96 | 0.00938  | 0.845(2456) | 0.861(4069)   | -0.136  | 0.0524 |
| jst5.            | 0   | 0.93 | 0.283    | 0.844(646)  | 0.871(643)    | -0.125  | 0.116  |
| may1.            | 0   | 1.00 | 0.416    | 0.849(929)  | 0.861(759)    | -0.0828 | 0.102  |
| mich.            | 0   | 0.91 | 0.703    | 0.854(481)  | 0.850(399)    | 0.0546  | 0.143  |
| pf1e.            | 0   | 0.93 | 0.478    | 0.865(375)  | 0.853(346)    | 0.114   | 0.161  |
| rom3.            | 0   | 1.03 | 0.548    | 0.827(233)  | 0.802(198)    | 0.111   | 0.185  |
| st2c.            | 0   | 0.96 | 0.267    | 0.831(628)  | 0.842(1219)   | -0.112  | 0.101  |
| stp1.            | 0   | 0.98 | 0.705    | 0.850(920)  | 0.842(973)    | 0.035   | 0.0925 |
| sw2.             | 0   | 0.99 | 0.254    | 0.851(885)  | 0.872(2252)   | -0.163  | 0.0847 |
| swei.            | 0   | 0.98 | 0.073    | 0.861(1278) | 0.875(3669)   | -0.124  | 0.0693 |
| top7.            | 0   | 0.93 | 0.935    | 0.869(416)  | 0.868(350)    | -0.0135 | 0.167  |
| top8.            | 0   | 1.07 | 0.371    | 0.838(148)  | 0.869(291)    | -0.18   | 0.201  |
| ucl2.            | 0   | 0.94 | 0.242    | 0.851(726)  | 0.866(693)    | -0.131  | 0.112  |
| uclo.            | 0   | 0.96 | 0.116    | 0.825(427)  | 0.851(488)    | -0.208  | 0.132  |
| uktr.            | 0   | 0.98 | 0.324    | 0.868(130)  | 0.895(130)    | -0.273  | 0.277  |
| ume4.            | 0   | 0.98 | 0.764    | 0.874(565)  | 0.869(569)    | 0.0385  | 0.128  |
| usc2.            | 0   | 0.99 | 0.000892 | 0.831(1293) | 0.864(1156)   | -0.276  | 0.0832 |
| wtc.             | 0   | 1.00 | 0.615    | 0.852(1644) | 0.858(1641)   | -0.036  | 0.0716 |
| jea2.            | 0   | 0.94 | 0.00524  | 0.826(372)  | 0.874(628)    | -0.379  | 0.136  |
| kfo4.            | 0   | 0.95 | 0.816    | 0.848(247)  | 0.835(288)    | 0.0433  | 0.186  |
| tgco2.           | 0   | 0.96 | 0.105    | 0.838(1032) | 0.861(499)    | -0.183  | 0.113  |
| bdtrs.           | 0   | 0.95 | 0.954    | 0.846(218)  | 0.844(684)    | 0.00916 | 0.159  |
| dutch.           | 0   | 0.96 | 0.982    | 0.851(831)  | 0.851(953)    | -0.0022 | 0.0973 |
| gawil.           | 0   | 0.94 | 0.282    | 0.840(268)  | 0.861(502)    | -0.163  | 0.186  |
| germ1.           | 0   | 0.96 | 0.359    | 0.850(219)  | 0.843(992)    | 0.142   | 0.154  |
| gpw1.            | 0   | 0.95 | 0.232    | 0.835(447)  | 0.851(2092)   | -0.125  | 0.104  |
| neuc1.           | 0   | 0.95 | 0.655    | 0.826(215)  | 0.837(750)    | -0.068  | 0.152  |
| spsp3.           | 0   | 0.93 | 0.00634  | 0.787(153)  | 0.846(2337)   | -0.419  | 0.153  |
| swed1.           | 0   | 0.96 | 0.0595   | 0.862(2909) | 0.873(2844)   | -0.108  | 0.0571 |
| ukwa1.           | 0   | 0.99 | 0.0033   | 0.844(2789) | 0.866(2372)   | -0.169  | 0.0575 |
| usaw4.           | 0   | 0.95 | 0.282    | 0.842(2956) | 0.842(2930)   | -0.115  | 0.0519 |
| usaw5.           | 0   | 0.94 | 0.611    | 0.842(1107) | 0.831(1316)   | 0.0427  | 0.0838 |
| deCODE.          | 0   | 1.00 | 0.203    | 0.867(1972) | 0.867(192602) | -0.062  | 0.0487 |
| EstonianBiobank. | 1   | 0.98 | 0.216    | 0.872(407)  | 0.884(17209)  | -0.135  | 0.109  |
| HUNT.            | 0   | 0.98 | 0.297    | 0.869(905)  | 0.877(41914)  | -0.0769 | 0.0738 |
| iPSYCH.          | 0   | 0.32 | 0.623    | 0.856(1758) | 0.854(5937)   | 0.0476  | 0.0966 |
| UKBiobank.       | 0   | 1.00 | 0.643    | 0.852(1454) | 0.856(58113)  | -0.0807 | 0.174  |
| bmrom.           | 0   | 0.92 | 0.895    | 0.798(225)  | 0.797(121)    | 0.0833  | 0.213  |
| bmrus.           | 0   | 0.97 | 0.284    | 0.850(522)  | 0.869(460)    | -0.144  | 0.135  |
| graza.           | 0   | 1.07 | 0.014    | 0.845(144)  | 0.741(66)     | 0.631   | 0.257  |
| greek.           | 0   | 0.95 | 0.831    | 0.784(186)  | 0.784(87)     | -0.0493 | 0.231  |
| norgs.           | 0   | 1.00 | 0.209    | 0.827(101)  | 0.870(315)    | -0.302  | 0.24   |
| noroe.           | 0   | 0.96 | 0.111    | 0.873(313)  | 0.858(4367)   | 0.211   | 0.132  |

1 0.94 1.63e-11 0.847(41917) 0.865(371549) -0.0917 0.0136

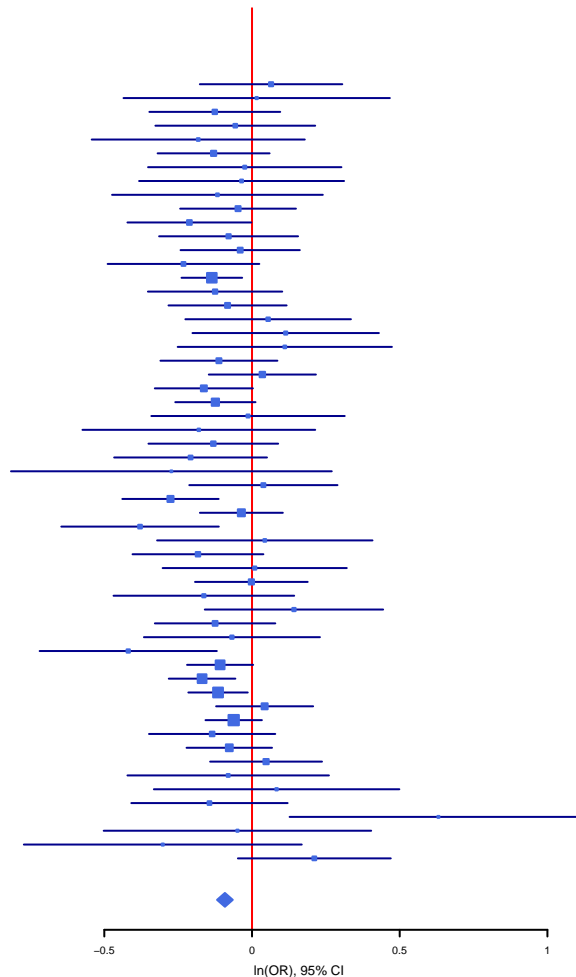

rs174592

A/G

11:61618608

het\_P:

0.643

het\_I:

0.0

|                  | ngt | info | p_value  | f_ca(n)     | f_co(n)       | ln(OR)  | STDerr |
|------------------|-----|------|----------|-------------|---------------|---------|--------|
| bmau.            | 0   | 1.00 | 0.0334   | 0.594(329)  | 0.640(1810)   | -0.186  | 0.0872 |
| bm2.             | 0   | 1.02 | 0.896    | 0.619(181)  | 0.641(478)    | 0.021   | 0.161  |
| bm3.             | 0   | 0.96 | 0.69     | 0.626(489)  | 0.637(880)    | -0.0344 | 0.0862 |
| bm4.             | 0   | 0.96 | 0.544    | 0.643(410)  | 0.656(689)    | -0.0616 | 0.102  |
| bm5.             | 0   | 0.88 | 0.614    | 0.643(253)  | 0.641(291)    | -0.0761 | 0.151  |
| bonn.            | 0   | 0.94 | 0.557    | 0.634(669)  | 0.644(1246)   | -0.044  | 0.075  |
| butr.            | 0   | 1.04 | 0.345    | 0.623(236)  | 0.653(236)    | -0.126  | 0.133  |
| cut1.            | 0   | 1.00 | 0.467    | 0.624(150)  | 0.601(150)    | 0.0951  | 0.131  |
| ed1.             | 0   | 0.95 | 0.677    | 0.662(275)  | 0.642(272)    | 0.057   | 0.137  |
| fat2.            | 0   | 0.96 | 0.131    | 0.619(722)  | 0.641(1027)   | -0.112  | 0.0741 |
| fran.            | 0   | 0.95 | 0.358    | 0.657(451)  | 0.640(1630)   | 0.0762  | 0.083  |
| gain.            | 0   | 0.99 | 0.0172   | 0.604(706)  | 0.646(593)    | -0.197  | 0.0829 |
| gsk1.            | 0   | 0.97 | 0.558    | 0.622(706)  | 0.636(899)    | -0.0441 | 0.0753 |
| ha2.             | 0   | 1.03 | 0.189    | 0.595(410)  | 0.641(479)    | -0.132  | 0.101  |
| icuk.            | 0   | 0.97 | 0.000701 | 0.607(2456) | 0.634(4069)   | -0.129  | 0.0382 |
| jst5.            | 0   | 0.99 | 0.728    | 0.628(646)  | 0.637(643)    | -0.0291 | 0.0831 |
| may1.            | 0   | 0.98 | 0.122    | 0.621(929)  | 0.643(759)    | -0.116  | 0.0747 |
| mich.            | 0   | 0.93 | 0.0158   | 0.606(481)  | 0.660(399)    | -0.253  | 0.105  |
| pf1e.            | 0   | 0.97 | 0.469    | 0.635(375)  | 0.625(346)    | 0.0828  | 0.115  |
| rom3.            | 0   | 0.98 | 0.595    | 0.636(233)  | 0.651(198)    | -0.0803 | 0.151  |
| st2c.            | 0   | 0.91 | 0.291    | 0.621(628)  | 0.635(1219)   | -0.0838 | 0.0793 |
| stp1.            | 0   | 0.91 | 0.841    | 0.618(920)  | 0.625(973)    | -0.0143 | 0.0717 |
| swa2.            | 0   | 0.97 | 0.774    | 0.625(885)  | 0.630(2252)   | -0.0177 | 0.0617 |
| swei.            | 0   | 1.00 | 0.0856   | 0.603(1278) | 0.624(3669)   | -0.0823 | 0.0479 |
| top7.            | 0   | 1.00 | 0.0167   | 0.585(416)  | 0.647(350)    | -0.27   | 0.113  |
| top8.            | 0   | 1.02 | 0.932    | 0.610(148)  | 0.609(291)    | 0.0129  | 0.151  |
| ucl2.            | 0   | 1.00 | 0.433    | 0.619(726)  | 0.635(693)    | -0.0616 | 0.0784 |
| uclo.            | 0   | 0.98 | 0.799    | 0.615(427)  | 0.619(488)    | -0.0252 | 0.0991 |
| uktr.            | 0   | 1.10 | 0.123    | 0.647(130)  | 0.578(130)    | 0.268   | 0.173  |
| ume4.            | 0   | 1.03 | 0.535    | 0.598(565)  | 0.613(569)    | -0.053  | 0.0656 |
| usc2.            | 0   | 1.03 | 0.193    | 0.625(1293) | 0.646(1156)   | -0.0789 | 0.0606 |
| wtc.             | 0   | 0.97 | 0.0652   | 0.620(1644) | 0.638(1641)   | -0.0976 | 0.0529 |
| jea2.            | 0   | 0.91 | 0.72     | 0.631(372)  | 0.637(628)    | -0.0369 | 0.103  |
| kfo4.            | 0   | 1.01 | 0.996    | 0.654(247)  | 0.658(288)    | 0.0006  | 0.137  |
| tgco2.           | 0   | 0.97 | 0.585    | 0.623(1032) | 0.632(499)    | -0.0447 | 0.0819 |
| bdtrs.           | 0   | 1.01 | 0.259    | 0.628(218)  | 0.656(684)    | -0.131  | 0.116  |
| dutch.           | 0   | 1.01 | 0.00177  | 0.609(631)  | 0.661(953)    | -0.22   | 0.0703 |
| gawil.           | 0   | 0.98 | 0.844    | 0.630(286)  | 0.645(502)    | -0.06   | 0.116  |
| germ1.           | 0   | 1.00 | 0.345    | 0.629(219)  | 0.661(992)    | -0.107  | 0.113  |
| gpw1.            | 0   | 1.02 | 0.377    | 0.634(447)  | 0.651(2092)   | -0.0677 | 0.0766 |
| neuc1.           | 0   | 0.98 | 0.612    | 0.644(215)  | 0.622(750)    | 0.0593  | 0.117  |
| spsp3.           | 0   | 0.98 | 0.304    | 0.596(153)  | 0.633(2337)   | -0.127  | 0.123  |
| swed1.           | 0   | 1.00 | 0.00201  | 0.608(2909) | 0.636(2844)   | -0.121  | 0.0391 |
| ukwa1.           | 0   | 0.99 | 0.208    | 0.623(2789) | 0.637(2372)   | -0.0523 | 0.0416 |
| usaw4.           | 0   | 1.02 | 0.845    | 0.630(2956) | 0.635(2930)   | -0.0171 | 0.0381 |
| usaw5.           | 0   | 0.99 | 0.803    | 0.640(1107) | 0.636(1316)   | 0.0158  | 0.0631 |
| deCODE.          | 0   | 1.00 | 0.00939  | 0.584(1972) | 0.584(192602) | -0.088  | 0.0339 |
| EstonianBiobank. | 1   | 1.00 | 0.0883   | 0.594(407)  | 0.622(17209)  | -0.124  | 0.0727 |
| HUNT.            | 0   | 1.00 | 0.39     | 0.609(905)  | 0.618(41914)  | -0.0426 | 0.0495 |
| iPSYCH.          | 0   | 1.01 | 0.8      | 0.648(1758) | 0.650(5937)   | -0.0102 | 0.0401 |
| UKBiobank.       | 0   | 1.00 | 0.0728   | 0.611(1454) | 0.629(58113)  | -0.302  | 0.168  |
| bmom.            | 0   | 0.95 | 0.867    | 0.657(225)  | 0.657(225)    | 0.0292  | 0.174  |
| bmrus.           | 0   | 0.96 | 0.352    | 0.619(522)  | 0.634(460)    | -0.0901 | 0.0969 |
| graza.           | 0   | 1.03 | 0.362    | 0.635(144)  | 0.672(66)     | -0.204  | 0.224  |
| greek.           | 0   | 0.91 | 0.619    | 0.632(186)  | 0.605(87)     | 0.0993  | 0.2    |
| norgs.           | 0   | 1.02 | 0.826    | 0.618(101)  | 0.621(315)    | -0.0383 | 0.174  |
| noroe.           | 0   | 0.97 | 0.00495  | 0.564(313)  | 0.613(4367)   | -0.246  | 0.0874 |

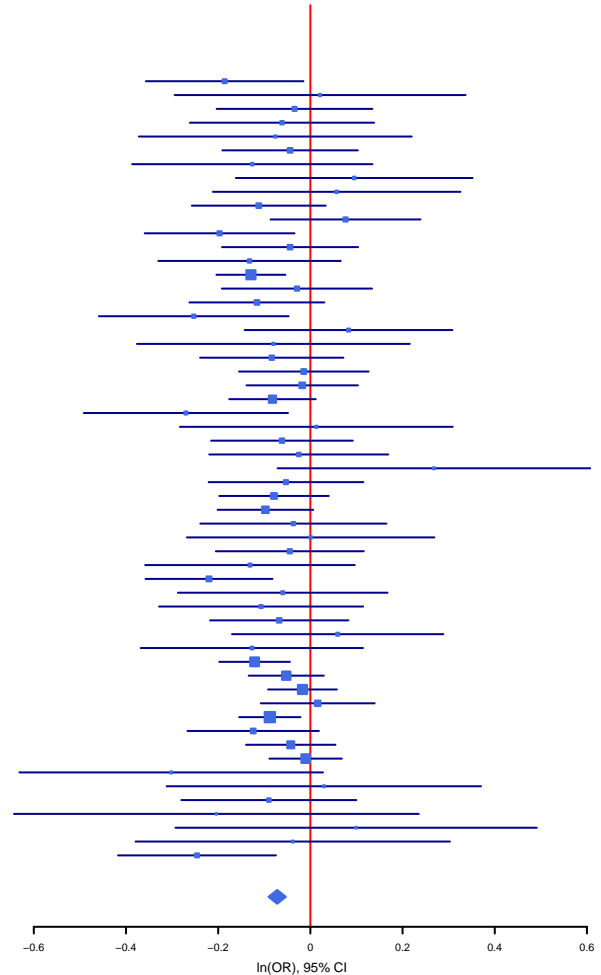

|                  | rs4672    | G/A         | 11:64009879     | het_P:              | 0.526                | het_I:        | 0.0           |
|------------------|-----------|-------------|-----------------|---------------------|----------------------|---------------|---------------|
|                  | ngt       | info        | p_value         | f_ca(n)             | f_co(n)              | ln(OR)        | STDerr        |
| bmau.            | 0         | 0.95        | 0.276           | 0.900(329)          | 0.912(1810)          | -0.16         | 0.147         |
| bm2.             | 1         | 1.04        | 0.329           | 0.928(181)          | 0.928(478)           | -0.288        | 0.294         |
| bm3.             | 0         | 0.97        | 0.521           | 0.916(489)          | 0.923(880)           | -0.0971       | 0.151         |
| bm4.             | 0         | 0.91        | 0.724           | 0.910(410)          | 0.921(689)           | -0.216        | 0.181         |
| bmsp.            | 0         | 0.99        | 0.964           | 0.912(253)          | 0.900(291)           | 0.0105        | 0.236         |
| born.            | 0         | 0.96        | 0.0342          | 0.907(669)          | 0.928(1246)          | -0.271        | 0.128         |
| butr.            | 1         | 0.95        | 0.522           | 0.922(236)          | 0.932(236)           | -0.164        | 0.257         |
| dub1.            | 0         | 0.95        | 0.473           | 0.897(150)          | 0.908(796)           | -0.155        | 0.216         |
| ed1.             | 0         | 0.87        | 0.383           | 0.924(275)          | 0.916(272)           | 0.219         | 0.251         |
| fat2.            | 0         | 0.93        | 0.883           | 0.908(722)          | 0.907(1027)          | 0.0184        | 0.125         |
| fran.            | 0         | 0.87        | 0.724           | 0.910(451)          | 0.906(1630)          | 0.0505        | 0.143         |
| gain.            | 0         | 0.91        | 0.308           | 0.925(706)          | 0.914(593)           | 0.156         | 0.153         |
| gsk1.            | 0         | 0.98        | 0.895           | 0.909(706)          | 0.910(899)           | -0.0165       | 0.126         |
| hal2.            | 1         | 0.99        | 0.16            | 0.912(410)          | 0.937(479)           | -0.268        | 0.191         |
| icuk.            | 1         | 1.01        | 0.165           | 0.910(2456)         | 0.917(4069)          | -0.0894       | 0.0644        |
| jst5.            | 1         | 0.97        | 0.856           | 0.931(646)          | 0.930(643)           | 0.0288        | 0.158         |
| may1.            | 1         | 1.03        | 0.362           | 0.924(929)          | 0.916(759)           | 0.118         | 0.129         |
| mich.            | 0         | 1.01        | 0.0101          | 0.898(481)          | 0.932(399)           | -0.461        | 0.179         |
| pf1.             | 1         | 0.99        | 0.984           | 0.923(375)          | 0.922(346)           | 0.00379       | 0.193         |
| rom3.            | 1         | 0.93        | 0.832           | 0.929(233)          | 0.932(198)           | -0.0625       | 0.295         |
| st2c.            | 0         | 0.78        | 0.267           | 0.909(628)          | 0.913(1219)          | -0.16         | 0.144         |
| swa2.            | 0         | 0.95        | 0.0248          | 0.920(885)          | 0.935(2252)          | -0.258        | 0.115         |
| swei.            | 1         | 1.02        | 0.136           | 0.923(1278)         | 0.934(3669)          | -0.132        | 0.0887        |
| top7.            | 0         | 0.93        | 0.783           | 0.936(416)          | 0.932(350)           | 0.0622        | 0.226         |
| top8.            | 1         | 1.02        | 0.165           | 0.943(148)          | 0.900(291)           | 0.41          | 0.295         |
| uc1.             | 1         | 0.99        | 0.0877          | 0.904(726)          | 0.923(693)           | -0.234        | 0.137         |
| uc1o.            | 0         | 0.75        | 0.447           | 0.919(427)          | 0.929(488)           | -0.158        | 0.208         |
| uktr.            | 1         | 0.92        | 0.216           | 0.942(130)          | 0.915(130)           | 0.446         | 0.361         |
| ume4.            | 1         | 0.96        | 0.633           | 0.948(565)          | 0.944(569)           | 0.0909        | 0.191         |
| usc2.            | 1         | 1.05        | 0.195           | 0.918(1293)         | 0.926(1156)          | -0.139        | 0.108         |
| wtc.             | 0         | 0.84        | 0.743           | 0.917(1644)         | 0.919(1641)          | -0.0328       | 0.1           |
| jea2.            | 0         | 0.94        | 0.625           | 0.913(372)          | 0.906(628)           | 0.0834        | 0.171         |
| kfo4.            | 1         | 1.05        | 0.42            | 0.913(247)          | 0.917(288)           | -0.183        | 0.228         |
| tgo2.            | 0         | 0.95        | 0.39            | 0.924(1032)         | 0.935(499)           | -0.137        | 0.159         |
| bdr.             | 1         | 0.92        | 0.312           | 0.940(218)          | 0.953(684)           | -0.255        | 0.253         |
| dutch.           | 1         | 1.02        | 0.318           | 0.915(831)          | 0.926(953)           | -0.124        | 0.124         |
| gawli.           | 1         | 0.98        | 0.0373          | 0.911(268)          | 0.937(502)           | -0.432        | 0.207         |
| germ1.           | 1         | 1.00        | 0.00408         | 0.897(219)          | 0.935(992)           | -0.543        | 0.189         |
| gpcw1.           | 1         | 0.98        | 0.0739          | 0.909(447)          | 0.928(2092)          | -0.238        | 0.133         |
| neuct1.          | 1         | 1.02        | 0.121           | 0.898(215)          | 0.917(750)           | -0.233        | 0.186         |
| sps3.            | 1         | 1.03        | 0.207           | 0.879(153)          | 0.896(2337)          | -0.231        | 0.189         |
| swed1.           | 1         | 0.98        | 0.162           | 0.922(2909)         | 0.929(2844)          | -0.102        | 0.0726        |
| ukwa1.           | 1         | 1.03        | 0.107           | 0.910(2789)         | 0.919(2372)          | -0.114        | 0.0705        |
| usaw4.           | 1         | 1.00        | 0.978           | 0.919(2956)         | 0.919(2930)          | 0.0019        | 0.0677        |
| usaw5.           | 1         | 1.00        | 0.741           | 0.922(1107)         | 0.918(1316)          | 0.0368        | 0.111         |
| deCODE.          | 0         | 1.00        | 0.162           | 0.912(1972)         | 0.912(192602)        | -0.0807       | 0.0576        |
| EstonianBiobank. | 1         | 0.99        | 0.0315          | 0.893(407)          | 0.917(17209)         | -0.252        | 0.117         |
| HUNT.            | 1         | 1.00        | 0.112           | 0.920(905)          | 0.931(4914)          | -0.146        | 0.084         |
| iPSYCH.          | 1         | 1.00        | 0.0683          | 0.908(1758)         | 0.917(5937)          | -0.122        | 0.0672        |
| UKBiobank.       | 0         | 1.00        | 0.217           | 0.911(1454)         | 0.917(58113)         | -0.193        | 0.157         |
| bmrom.           | 1         | 1.04        | 0.778           | 0.940(225)          | 0.946(121)           | -0.0976       | 0.346         |
| bmrus.           | 0         | 0.97        | 0.327           | 0.927(522)          | 0.935(460)           | -0.181        | 0.185         |
| graza.           | 1         | 0.99        | 0.778           | 0.927(144)          | 0.917(66)            | 0.112         | 0.396         |
| greek.           | 0         | 0.93        | 0.338           | 0.944(186)          | 0.925(87)            | 0.372         | 0.389         |
| noigs.           | 0         | 1.00        | 0.0237          | 0.905(101)          | 0.950(315)           | -0.722        | 0.319         |
| noroe.           | 1         | 1.00        | 0.94            | 0.933(313)          | 0.928(4367)          | 0.0126        | 0.167         |
|                  | <b>32</b> | <b>0.98</b> | <b>3.42e-09</b> | <b>0.916(41917)</b> | <b>0.917(371549)</b> | <b>-0.102</b> | <b>0.0172</b> |

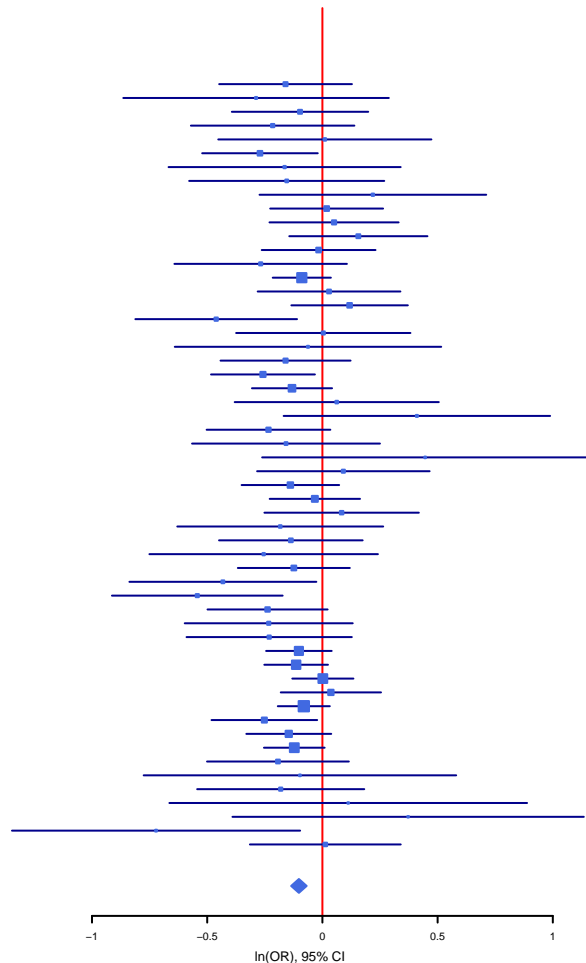



rs475805

G/A

11:65848738

het\_P:

0.157

het\_L:

16.0

|            | ngt | info | p_value | f_ca(n)     | f_co(n)       | ln(OR)   | STDerr |
|------------|-----|------|---------|-------------|---------------|----------|--------|
| bmou.      | 0   | 0.97 | 0.178   | 0.216(329)  | 0.237(1810)   | -0.141   | 0.104  |
| bmj2.      | 0   | 1.09 | 0.537   | 0.224(181)  | 0.225(478)    | 0.109    | 0.177  |
| bmj3.      | 0   | 0.96 | 0.495   | 0.228(489)  | 0.237(880)    | -0.0676  | 0.0991 |
| bmjco.     | 0   | 0.98 | 0.227   | 0.244(410)  | 0.244(899)    | -0.0103  | 0.112  |
| bmjps.     | 0   | 1.04 | 0.034   | 0.248(253)  | 0.302(291)    | -0.316   | 0.149  |
| bonn.      | 0   | 1.00 | 0.731   | 0.224(669)  | 0.232(1246)   | -0.0285  | 0.0829 |
| butr.      | 0   | 0.94 | 0.763   | 0.246(236)  | 0.254(236)    | -0.0468  | 0.155  |
| dub1.      | 0   | 1.02 | 0.682   | 0.220(150)  | 0.232(796)    | -0.062   | 0.151  |
| edi1.      | 0   | 0.97 | 0.786   | 0.225(275)  | 0.222(272)    | 0.0419   | 0.154  |
| fal2.      | 0   | 0.94 | 0.433   | 0.230(722)  | 0.245(1027)   | -0.0666  | 0.0848 |
| fran.      | 0   | 0.99 | 0.118   | 0.274(451)  | 0.240(1630)   | 0.136    | 0.0872 |
| gain.      | 0   | 0.94 | 0.619   | 0.236(706)  | 0.245(593)    | -0.0476  | 0.0957 |
| gsk1.      | 0   | 1.03 | 0.842   | 0.222(706)  | 0.226(899)    | -0.0168  | 0.0847 |
| hal2.      | 0   | 1.00 | 0.417   | 0.232(410)  | 0.245(479)    | -0.0945  | 0.117  |
| icuk.      | 0   | 0.98 | 0.303   | 0.223(2456) | 0.232(4069)   | -0.0455  | 0.0442 |
| jst5.      | 0   | 0.97 | 0.0522  | 0.226(646)  | 0.258(643)    | -0.183   | 0.0944 |
| may1.      | 0   | 1.01 | 0.131   | 0.225(929)  | 0.248(759)    | -0.126   | 0.0834 |
| nich.      | 0   | 0.98 | 0.227   | 0.214(481)  | 0.240(399)    | -0.141   | 0.116  |
| plf1.      | 0   | 0.98 | 0.404   | 0.255(376)  | 0.259(346)    | 0.108    | 0.129  |
| rom3.      | 0   | 1.07 | 0.332   | 0.235(233)  | 0.263(198)    | -0.155   | 0.16   |
| st2c.      | 0   | 1.03 | 0.595   | 0.246(628)  | 0.261(1219)   | -0.0441  | 0.0829 |
| stp1.      | 0   | 0.97 | 0.153   | 0.234(920)  | 0.255(973)    | -0.112   | 0.0782 |
| swa2.      | 0   | 1.00 | 0.00169 | 0.200(885)  | 0.235(2252)   | -0.228   | 0.0726 |
| swei.      | 0   | 1.02 | 0.19    | 0.211(1278) | 0.226(3669)   | -0.0739  | 0.0563 |
| top7.      | 0   | 0.95 | 0.164   | 0.189(416)  | 0.229(350)    | -0.191   | 0.138  |
| top5.      | 0   | 1.00 | 0.376   | 0.250(148)  | 0.223(291)    | 0.155    | 0.175  |
| uc12.      | 0   | 0.96 | 0.27    | 0.222(726)  | 0.259(693)    | -0.101   | 0.0917 |
| uclo.      | 0   | 0.96 | 0.00356 | 0.205(427)  | 0.259(488)    | -0.342   | 0.117  |
| uktr.      | 0   | 0.96 | 0.0207  | 0.189(130)  | 0.273(130)    | -0.506   | 0.218  |
| ume4.      | 0   | 1.04 | 0.0627  | 0.208(565)  | 0.243(569)    | -0.186   | 0.0999 |
| usc2.      | 0   | 0.99 | 0.488   | 0.248(1293) | 0.238(1156)   | 0.0478   | 0.069  |
| wtcc.      | 0   | 1.00 | 0.327   | 0.225(1644) | 0.234(1641)   | -0.0587  | 0.0599 |
| jea2.      | 0   | 1.03 | 0.00934 | 0.208(372)  | 0.259(628)    | -0.292   | 0.112  |
| kfo4.      | 0   | 1.00 | 0.127   | 0.217(247)  | 0.265(288)    | -0.237   | 0.155  |
| tgco2.     | 0   | 0.99 | 0.797   | 0.226(1032) | 0.226(499)    | -0.0241  | 0.0934 |
| bdrs.      | 0   | 0.98 | 0.761   | 0.241(218)  | 0.239(684)    | 0.0404   | 0.133  |
| dutch.     | 0   | 0.97 | 0.265   | 0.224(831)  | 0.237(953)    | -0.0916  | 0.0822 |
| gawil.     | 0   | 0.98 | 0.309   | 0.255(268)  | 0.232(502)    | 0.13     | 0.127  |
| germ1.     | 0   | 0.98 | 0.527   | 0.246(219)  | 0.229(992)    | 0.0809   | 0.128  |
| gpcw1.     | 0   | 0.95 | 0.786   | 0.238(447)  | 0.243(2092)   | -0.0241  | 0.0888 |
| neuc1.     | 0   | 1.05 | 0.0175  | 0.193(215)  | 0.251(750)    | -0.322   | 0.136  |
| spsp3.     | 0   | 0.99 | 0.53    | 0.304(153)  | 0.288(237)    | 0.0814   | 0.13   |
| swed1.     | 0   | 1.00 | 0.00183 | 0.214(2909) | 0.239(2844)   | -0.142   | 0.0454 |
| ukwa1.     | 0   | 0.99 | 0.59    | 0.229(2789) | 0.233(2372)   | -0.0256  | 0.0476 |
| usaw4.     | 0   | 0.99 | 0.14    | 0.245(2956) | 0.256(2930)   | -0.0635  | 0.043  |
| usaw5.     | 0   | 1.02 | 0.538   | 0.233(1107) | 0.250(1316)   | -0.0427  | 0.0694 |
| deCODE.    | 0   | 1.00 | 0.108   | 0.235(1972) | 0.235(192802) | -0.064   | 0.0399 |
| iHUNT.     | 0   | 1.00 | 0.553   | 0.218(905)  | 0.211(41914)  | 0.035    | 0.059  |
| iPSYCH.    | 0   | 1.00 | 0.633   | 0.222(1758) | 0.225(5937)   | -0.022   | 0.0461 |
| UKBiobank. | 0   | 1.00 | 0.198   | 0.228(1454) | 0.236(58113)  | -0.24    | 0.186  |
| bmrom.     | 0   | 1.07 | 0.0286  | 0.229(225)  | 0.316(121)    | -0.392   | 0.179  |
| bmrus.     | 0   | 0.98 | 0.939   | 0.240(522)  | 0.242(460)    | -0.00833 | 0.108  |
| graza.     | 0   | 1.07 | 0.646   | 0.221(144)  | 0.242(66)     | -0.111   | 0.241  |
| greek.     | 0   | 1.12 | 0.349   | 0.240(186)  | 0.281(87)     | -0.185   | 0.198  |
| riorgs.    | 0   | 1.03 | 0.273   | 0.174(101)  | 0.231(315)    | -0.237   | 0.216  |
| noroe.     | 0   | 0.98 | 0.44    | 0.207(313)  | 0.206(4367)   | -0.0827  | 0.107  |

0 0.99 1.99e-09 0.228(41917) 0.233(371549) -0.067 0.0112

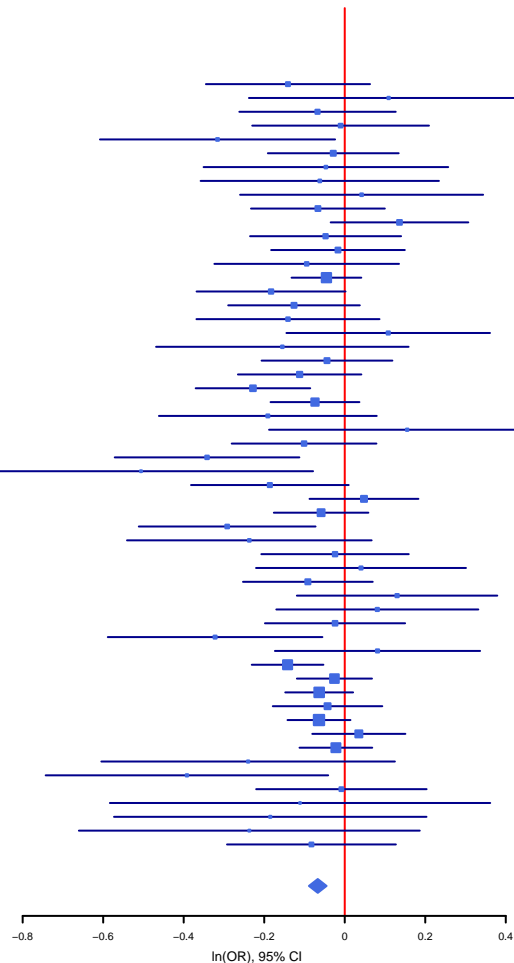

rs678397

T/C

11:66324583

het\_P:

0.0255

het\_I:

28.6

|                  | ngt      | info        | p_value         | f_ca(n)             | f_co(n)              | ln(OR)        | STDerr        |
|------------------|----------|-------------|-----------------|---------------------|----------------------|---------------|---------------|
| bmau.            | 0        | 0.98        | 0.87            | 0.482(329)          | 0.479(1810)          | 0.0141        | 0.0859        |
| bm2.             | 0        | 1.00        | 0.416           | 0.442(181)          | 0.420(478)           | 0.127         | 0.156         |
| bm3.             | 0        | 1.02        | 0.342           | 0.461(489)          | 0.449(880)           | 0.0775        | 0.0816        |
| bmpo.            | 0        | 0.99        | 0.0162          | 0.453(410)          | 0.397(689)           | 0.234         | 0.0971        |
| bmsp.            | 0        | 0.96        | 0.817           | 0.467(253)          | 0.454(291)           | 0.0321        | 0.139         |
| bonn.            | 0        | 0.99        | 0.00766         | 0.497(669)          | 0.443(1246)          | 0.187         | 0.0702        |
| butr.            | 1        | 1.06        | 0.7             | 0.407(236)          | 0.419(236)           | -0.0496       | 0.129         |
| dub1.            | 0        | 0.95        | 0.165           | 0.467(150)          | 0.467(150)           | 0.0656        | 0.131         |
| edf1.            | 0        | 1.03        | 0.229           | 0.444(275)          | 0.482(272)           | -0.151        | 0.126         |
| fat2.            | 0        | 0.98        | 0.458           | 0.483(722)          | 0.468(1027)          | 0.0527        | 0.071         |
| fran.            | 0        | 0.96        | 0.183           | 0.487(451)          | 0.462(1630)          | 0.104         | 0.0782        |
| gain.            | 0        | 1.00        | 0.161           | 0.444(706)          | 0.469(593)           | -0.112        | 0.0798        |
| gsk1.            | 0        | 1.00        | 0.00126         | 0.514(706)          | 0.457(899)           | 0.232         | 0.072         |
| hal2.            | 0        | 1.03        | 0.256           | 0.471(410)          | 0.441(479)           | 0.111         | 0.0978        |
| icuk.            | 0        | 1.01        | 0.73            | 0.458(2456)         | 0.454(4069)          | 0.0126        | 0.0366        |
| js15.            | 0        | 1.03        | 0.377           | 0.446(646)          | 0.462(643)           | -0.0696       | 0.0738        |
| may1.            | 1        | 1.00        | 0.842           | 0.474(929)          | 0.464(759)           | 0.0143        | 0.0716        |
| mich.            | 0        | 0.97        | 0.569           | 0.474(481)          | 0.457(399)           | 0.0564        | 0.0991        |
| pf1e.            | 0        | 1.00        | 0.0475          | 0.485(375)          | 0.429(346)           | 0.218         | 0.11          |
| rom3.            | 0        | 0.98        | 0.343           | 0.474(233)          | 0.450(198)           | 0.137         | 0.145         |
| st2c.            | 0        | 0.99        | 0.143           | 0.493(628)          | 0.470(1219)          | 0.108         | 0.0735        |
| stp1.            | 0        | 1.01        | 0.31            | 0.468(920)          | 0.451(973)           | 0.067         | 0.066         |
| swa2.            | 0        | 1.00        | 0.472           | 0.455(895)          | 0.454(2252)          | 0.0424        | 0.059         |
| swei.            | 0        | 0.99        | 0.00767         | 0.475(1278)         | 0.446(3669)          | 0.125         | 0.047         |
| top7.            | 0        | 1.00        | 0.82            | 0.469(416)          | 0.471(350)           | -0.0249       | 0.109         |
| top8.            | 0        | 0.96        | 0.124           | 0.426(148)          | 0.479(291)           | -0.234        | 0.152         |
| ucl2.            | 0        | 0.97        | 0.195           | 0.489(726)          | 0.466(693)           | 0.0998        | 0.0771        |
| uclo.            | 0        | 1.06        | 0.712           | 0.460(427)          | 0.454(488)           | 0.0343        | 0.0929        |
| uktr.            | 1        | 0.97        | 0.859           | 0.488(130)          | 0.481(130)           | 0.0318        | 0.178         |
| um4.             | 0        | 0.95        | 0.0399          | 0.489(565)          | 0.448(569)           | 0.179         | 0.0872        |
| usc2.            | 0        | 0.98        | 0.793           | 0.458(1293)         | 0.450(1156)          | 0.0157        | 0.0597        |
| wlcc.            | 0        | 1.02        | 0.00982         | 0.473(1644)         | 0.443(1641)          | 0.13          | 0.0502        |
| jea2.            | 0        | 0.97        | 0.112           | 0.434(372)          | 0.393(628)           | 0.154         | 0.0972        |
| kfo4.            | 0        | 1.03        | 0.181           | 0.418(247)          | 0.431(288)           | -0.177        | 0.132         |
| tgco2.           | 0        | 1.06        | 0.266           | 0.470(1032)         | 0.447(499)           | 0.0847        | 0.0762        |
| bdtrs.           | 0        | 1.04        | 0.0137          | 0.513(218)          | 0.442(684)           | 0.273         | 0.111         |
| dutch.           | 0        | 1.00        | 0.827           | 0.459(831)          | 0.455(953)           | 0.015         | 0.0684        |
| gaw1.            | 0        | 0.99        | 0.815           | 0.458(268)          | 0.450(262)           | -0.0257       | 0.11          |
| germ1.           | 0        | 0.98        | 0.979           | 0.442(219)          | 0.460(992)           | -0.0029       | 0.111         |
| gpcw1.           | 0        | 1.00        | 0.367           | 0.439(447)          | 0.453(2092)          | -0.0673       | 0.0746        |
| neuc1.           | 0        | 0.97        | 0.3             | 0.502(215)          | 0.481(750)           | 0.118         | 0.114         |
| spsp3.           | 0        | 0.97        | 0.472           | 0.444(153)          | 0.466(2337)          | -0.0872       | 0.121         |
| swed1.           | 0        | 1.01        | 0.104           | 0.467(2909)         | 0.450(2844)          | 0.0613        | 0.0377        |
| ukwa1.           | 0        | 0.99        | 0.389           | 0.466(2789)         | 0.456(2372)          | 0.0346        | 0.0402        |
| usa4.            | 0        | 0.99        | 0.778           | 0.470(256)          | 0.467(2930)          | 0.0105        | 0.0373        |
| usa5.            | 0        | 1.02        | 0.215           | 0.469(1107)         | 0.457(1316)          | 0.0741        | 0.0597        |
| deCODE.          | 0        | 1.00        | 0.0241          | 0.463(1972)         | 0.463(192602)        | 0.0751        | 0.0333        |
| EstonianBiobank. | 1        | 0.99        | 0.32            | 0.413(407)          | 0.399(17209)         | 0.0729        | 0.0733        |
| HUNT.            | 0        | 1.00        | 0.439           | 0.443(905)          | 0.453(41914)         | -0.0374       | 0.0484        |
| iPSYCH.          | 0        | 0.98        | 0.54            | 0.471(1758)         | 0.465(5937)          | 0.0239        | 0.0389        |
| UKBiobank.       | 0        | 1.00        | 4.7e-05         | 0.485(1454)         | 0.457(5813)          | 0.709         | 0.174         |
| bmrom.           | 1        | 0.99        | 0.92            | 0.470(251)          | 0.496(121)           | -0.0473       | 0.171         |
| bmrus.           | 0        | 1.00        | 0.0338          | 0.457(522)          | 0.404(460)           | 0.198         | 0.0932        |
| graza.           | 1        | 0.89        | 0.472           | 0.448(144)          | 0.409(66)            | 0.169         | 0.235         |
| greek.           | 0        | 1.04        | 0.866           | 0.451(186)          | 0.460(87)            | -0.0311       | 0.184         |
| norgs.           | 0        | 1.03        | 0.964           | 0.455(101)          | 0.457(315)           | -0.00763      | 0.168         |
| noroe.           | 0        | 1.00        | 0.784           | 0.466(313)          | 0.466(4367)          | 0.0232        | 0.0848        |
|                  | <b>6</b> | <b>1.00</b> | <b>5.46e-09</b> | <b>0.467(41917)</b> | <b>0.457(371549)</b> | <b>0.0545</b> | <b>0.0093</b> |

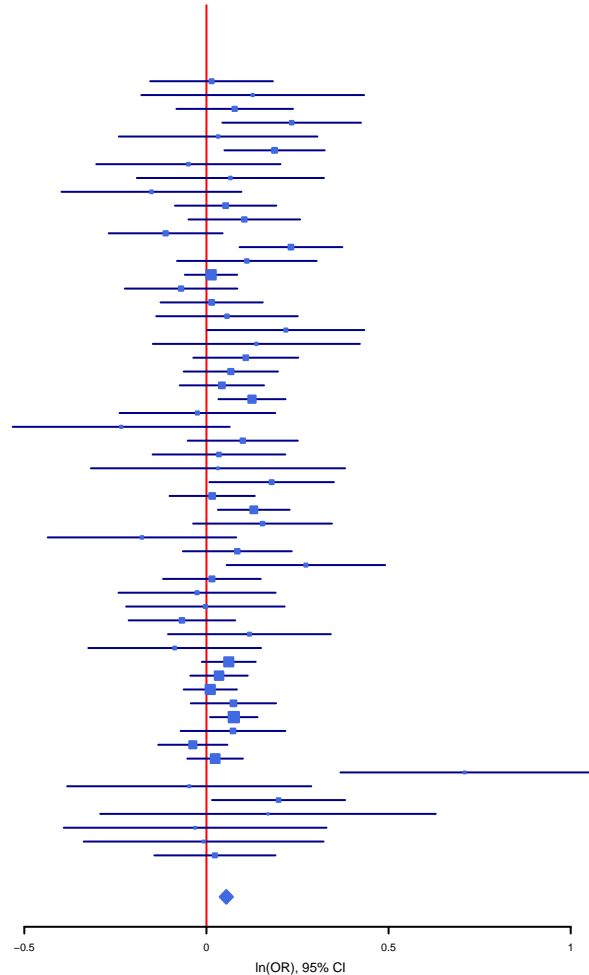

rs12575685

G/A

11:70517927

het\_P:

0.0965

het\_I:

20.2

|                  | ngt         | info            | p_value             | f_ca(n)              | f_co(n)        | ln(OR)        | STDerr |
|------------------|-------------|-----------------|---------------------|----------------------|----------------|---------------|--------|
| bmau.            | 0           | 0.97            | 0.111               | 0.656(329)           | 0.668(1810)    | -0.146        | 0.0918 |
| bm2g.            | 1           | 0.98            | 0.109               | 0.641(1811)          | 0.676(478)     | -0.271        | 0.169  |
| bm3.             | 0           | 0.95            | 0.629               | 0.671(489)           | 0.679(880)     | -0.0432       | 0.0893 |
| bmpo.            | 0           | 1.00            | 0.269               | 0.648(410)           | 0.663(689)     | -0.111        | 0.101  |
| bmsp.            | 0           | 0.97            | 0.37                | 0.723(253)           | 0.706(291)     | 0.138         | 0.154  |
| bonn.            | 0           | 0.95            | 0.169               | 0.647(669)           | 0.674(1246)    | -0.104        | 0.0754 |
| butr.            | 1           | 1.03            | 0.835               | 0.693(236)           | 0.699(236)     | -0.029        | 0.139  |
| dub1.            | 1           | 1.02            | 0.652               | 0.712(756)           | 0.712(756)     | -0.228        | 0.34   |
| edf1.            | 0           | 0.87            | 0.352               | 0.699(275)           | 0.721(272)     | -0.139        | 0.15   |
| fat2.            | 1           | 1.03            | 0.00336             | 0.660(722)           | 0.702(1027)    | -0.218        | 0.0743 |
| fran.            | 0           | 0.92            | 0.00248             | 0.654(451)           | 0.709(1630)    | -0.257        | 0.085  |
| gain.            | 1           | 1.02            | 0.978               | 0.688(706)           | 0.685(593)     | -0.0023       | 0.0847 |
| gsk1.            | 0           | 0.95            | 0.269               | 0.675(706)           | 0.694(899)     | -0.0869       | 0.0786 |
| hal2.            | 1           | 1.01            | 0.665               | 0.683(410)           | 0.685(479)     | 0.0458        | 0.106  |
| icuk.            | 1           | 1.00            | 0.703               | 0.692(2456)          | 0.692(4069)    | -0.0151       | 0.0397 |
| js15.            | 0           | 1.01            | 0.0974              | 0.681(646)           | 0.710(643)     | -0.143        | 0.0863 |
| may1.            | 1           | 0.95            | 0.693               | 0.680(929)           | 0.684(759)     | -0.0309       | 0.0782 |
| mich.            | 0           | 0.96            | 0.387               | 0.706(481)           | 0.687(399)     | 0.0929        | 0.107  |
| pf1e.            | 1           | 1.04            | 0.895               | 0.672(375)           | 0.669(346)     | 0.0148        | 0.113  |
| rom3.            | 1           | 1.06            | 0.275               | 0.686(233)           | 0.719(198)     | -0.167        | 0.153  |
| st2c.            | 0           | 0.84            | 0.544               | 0.716(628)           | 0.687(1219)    | 0.0537        | 0.0886 |
| stp1.            | 0           | 0.87            | 0.296               | 0.702(920)           | 0.684(973)     | 0.0803        | 0.0768 |
| swa2.            | 1           | 1.00            | 0.395               | 0.693(855)           | 0.664(2252)    | -0.132        | 0.0628 |
| swei.            | 1           | 1.02            | 0.252               | 0.652(1278)          | 0.661(3669)    | -0.0557       | 0.0487 |
| top7.            | 0           | 1.00            | 0.243               | 0.666(416)           | 0.641(350)     | 0.133         | 0.114  |
| top8.            | 1           | 1.04            | 0.106               | 0.642(148)           | 0.691(291)     | -0.249        | 0.154  |
| ucl2.            | 1           | 1.00            | 0.0108              | 0.649(726)           | 0.693(693)     | -0.206        | 0.0809 |
| uclo.            | 0           | 0.90            | 0.00589             | 0.642(427)           | 0.698(488)     | -0.297        | 0.108  |
| uktr.            | 1           | 0.98            | 0.845               | 0.704(130)           | 0.712(130)     | -0.038        | 0.195  |
| umr4.            | 1           | 1.01            | 0.159               | 0.674(565)           | 0.704(569)     | -0.128        | 0.0912 |
| usc2.            | 1           | 1.03            | 0.429               | 0.697(1293)          | 0.705(1156)    | -0.05         | 0.0632 |
| wlcc.            | 0           | 0.93            | 0.401               | 0.699(1644)          | 0.683(1641)    | 0.0476        | 0.0567 |
| jea2.            | 0           | 0.92            | 0.945               | 0.657(372)           | 0.651(628)     | -0.00713      | 0.103  |
| kfo4.            | 0           | 0.97            | 0.618               | 0.664(247)           | 0.682(288)     | -0.0709       | 0.142  |
| tgco2.           | 0           | 0.94            | 0.453               | 0.685(1032)          | 0.700(499)     | -0.0656       | 0.0875 |
| bdrs.            | 0           | 0.95            | 0.119               | 0.649(218)           | 0.692(684)     | -0.19         | 0.122  |
| dutch.           | 0           | 0.92            | 0.543               | 0.679(831)           | 0.670(953)     | 0.0459        | 0.0755 |
| gawil.           | 0           | 0.92            | 0.16                | 0.692(268)           | 0.645(252)     | 0.118         | 0.12   |
| germ1.           | 0           | 0.90            | 0.0352              | 0.638(219)           | 0.681(992)     | -0.253        | 0.12   |
| gpcw1.           | 0           | 0.97            | 0.773               | 0.697(447)           | 0.689(2092)    | 0.0238        | 0.0823 |
| neuc1.           | 0           | 0.94            | 0.0346              | 0.654(215)           | 0.700(750)     | -0.258        | 0.122  |
| spsp3.           | 0           | 0.91            | 0.0365              | 0.616(153)           | 0.671(2337)    | -0.27         | 0.129  |
| swd1.            | 0           | 0.95            | 0.168               | 0.660(2909)          | 0.672(2844)    | -0.0566       | 0.0411 |
| ukwa1.           | 0           | 0.94            | 0.845               | 0.681(2789)          | 0.682(2372)    | -0.00864      | 0.0442 |
| usaw4.           | 0           | 0.89            | 0.16                | 0.692(2956)          | 0.704(2930)    | -0.0603       | 0.0429 |
| usaw5.           | 0           | 0.94            | 0.86                | 0.695(1107)          | 0.704(1316)    | -0.0119       | 0.0677 |
| deCODE.          | 0           | 1.00            | 0.00877             | 0.670(1972)          | 0.670(19260)   | -0.0926       | 0.0353 |
| EstonianBiobank. | 1           | 0.97            | 0.419               | 0.651(407)           | 0.667(17209)   | -0.0616       | 0.0762 |
| HUNT.            | 0           | 0.98            | 0.227               | 0.634(905)           | 0.647(41914)   | -0.0615       | 0.0509 |
| iPSYCH.          | 0           | 0.94            | 0.0335              | 0.643(1758)          | 0.662(5937)    | -0.0883       | 0.0415 |
| UKBiobank.       | 0           | 1.00            | 0.323               | 0.693(1454)          | 0.690(58113)   | -0.165        | 0.167  |
| bmron.           | 1           | 1.02            | 0.205               | 0.714(2121)          | 0.712(2121)    | -0.0987       | 0.161  |
| bmrus.           | 0           | 0.96            | 0.0488              | 0.654(522)           | 0.686(460)     | -0.199        | 0.101  |
| graza.           | 1           | 1.05            | 0.0933              | 0.601(144)           | 0.674(66)      | -0.381        | 0.227  |
| greek.           | 0           | 0.94            | 0.98                | 0.717(186)           | 0.717(87)      | -0.00521      | 0.212  |
| norgs.           | 1           | 0.87            | 0.315               | 0.683(101)           | 0.644(315)     | 0.196         | 0.194  |
| noroe.           | 1           | 1.00            | 0.284               | 0.653(313)           | 0.667(4367)    | -0.0964       | 0.09   |
| <b>21</b>        | <b>0.96</b> | <b>1.24e-10</b> | <b>0.674(41917)</b> | <b>0.673(371549)</b> | <b>-0.0652</b> | <b>0.0101</b> |        |

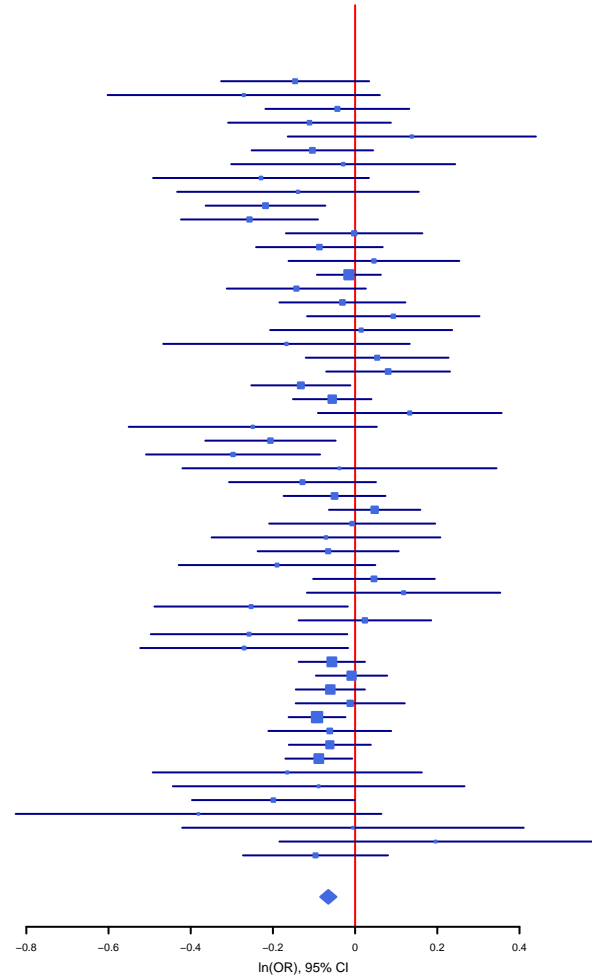

rs12289486

C/T

11:79092527

het\_P:

0.353

het\_I:

5.7

|                  | ngt       | info        | p_value        | f_ca(n)             | f_co(n)              | ln(OR)         | STDerr        |
|------------------|-----------|-------------|----------------|---------------------|----------------------|----------------|---------------|
| bmau.            | 0         | 1.02        | 0.0499         | 0.858(329)          | 0.886(1810)          | -0.241         | 0.123         |
| bmng2.           | 0         | 0.92        | 0.52           | 0.895(181)          | 0.895(478)           | -0.172         | 0.268         |
| bmng3.           | 0         | 0.99        | 0.0872         | 0.894(489)          | 0.912(880)           | -0.236         | 0.138         |
| bmnp0.           | 0         | 1.02        | 0.374          | 0.904(410)          | 0.918(689)           | -0.147         | 0.165         |
| bmnp.            | 0         | 0.98        | 0.667          | 0.863(253)          | 0.875(291)           | -0.0882        | 0.205         |
| bonn.            | 0         | 0.95        | 0.555          | 0.890(669)          | 0.899(1246)          | -0.0688        | 0.117         |
| butr.            | 0         | 1.04        | 0.75           | 0.883(236)          | 0.890(236)           | -0.0642        | 0.202         |
| dut1.            | 0         | 0.98        | 0.162          | 0.871(1150)         | 0.869(796)           | -0.065         | 0.148         |
| edf1.            | 1         | 1.04        | 0.0678         | 0.866(275)          | 0.897(272)           | -0.359         | 0.196         |
| fat2.            | 1         | 0.99        | 0.155          | 0.887(722)          | 0.900(1027)          | -0.162         | 0.114         |
| fran.            | 0         | 1.02        | 0.51           | 0.884(451)          | 0.891(1630)          | -0.0781        | 0.118         |
| gain.            | 1         | 1.03        | 0.278          | 0.887(706)          | 0.900(593)           | -0.138         | 0.127         |
| gsk1.            | 0         | 0.99        | 0.0447         | 0.873(706)          | 0.894(899)           | -0.225         | 0.112         |
| hal2.            | 0         | 1.07        | 0.958          | 0.885(410)          | 0.881(479)           | 0.00787        | 0.149         |
| icuk.            | 0         | 0.99        | 0.51           | 0.880(2456)         | 0.884(4069)          | -0.029         | 0.0568        |
| jis5.            | 0         | 1.01        | 0.549          | 0.889(646)          | 0.896(643)           | -0.0768        | 0.128         |
| may1.            | 0         | 1.01        | 0.288          | 0.897(929)          | 0.905(759)           | -0.127         | 0.12          |
| mich.            | 0         | 1.02        | 0.23           | 0.883(481)          | 0.903(399)           | -0.187         | 0.156         |
| pf1e.            | 0         | 1.01        | 0.617          | 0.893(375)          | 0.889(346)           | 0.0872         | 0.174         |
| rom3.            | 0         | 0.97        | 0.344          | 0.927(233)          | 0.907(198)           | 0.25           | 0.265         |
| st2c.            | 1         | 1.01        | 0.0152         | 0.882(628)          | 0.906(1219)          | -0.284         | 0.117         |
| stp1.            | 1         | 1.00        | 0.172          | 0.881(920)          | 0.897(973)           | -0.144         | 0.105         |
| swa2.            | 0         | 0.99        | 0.999          | 0.889(885)          | 0.907(2252)          | -0.222         | 0.0955        |
| swei.            | 0         | 0.99        | 0.738          | 0.906(1278)         | 0.902(3669)          | 0.0267         | 0.0798        |
| top7.            | 1         | 0.97        | 0.827          | 0.894(416)          | 0.887(350)           | 0.0387         | 0.177         |
| top8.            | 0         | 1.06        | 0.919          | 0.888(148)          | 0.887(291)           | -0.0231        | 0.227         |
| ucl2.            | 0         | 1.01        | 0.658          | 0.890(726)          | 0.885(693)           | 0.0527         | 0.119         |
| ucl0.            | 1         | 0.93        | 0.521          | 0.864(427)          | 0.876(488)           | -0.0939        | 0.146         |
| uktr.            | 0         | 1.02        | 0.309          | 0.888(130)          | 0.915(130)           | -0.301         | 0.295         |
| ume4.            | 0         | 1.01        | 0.108          | 0.899(565)          | 0.919(569)           | -0.237         | 0.148         |
| usc2.            | 0         | 1.00        | 0.393          | 0.878(1293)         | 0.886(1156)          | -0.0775        | 0.0908        |
| wtoc.            | 1         | 1.00        | 0.0333         | 0.875(1644)         | 0.892(1641)          | -0.168         | 0.0791        |
| jea2.            | 0         | 0.98        | 0.0135         | 0.930(372)          | 0.897(628)           | 0.436          | 0.176         |
| kfo4.            | 0         | 0.95        | 0.0657         | 0.925(247)          | 0.901(288)           | 0.445          | 0.242         |
| tgco2.           | 1         | 1.00        | 0.79           | 0.887(1032)         | 0.889(499)           | -0.0329        | 0.123         |
| bdtrs.           | 0         | 0.97        | 0.21           | 0.885(218)          | 0.911(684)           | -0.233         | 0.186         |
| dutch.           | 0         | 0.97        | 0.879          | 0.897(831)          | 0.898(953)           | 0.0173         | 0.114         |
| gaw1.            | 0         | 0.98        | 0.751          | 0.894(268)          | 0.895(262)           | -0.0542        | 0.178         |
| germ1.           | 0         | 1.01        | 0.47           | 0.909(219)          | 0.893(992)           | 0.133          | 0.185         |
| gpcw1.           | 0         | 0.96        | 0.545          | 0.894(447)          | 0.899(2092)          | -0.0745        | 0.123         |
| neuc1.           | 0         | 0.96        | 0.152          | 0.877(215)          | 0.899(750)           | -0.254         | 0.177         |
| spsp3.           | 0         | 0.95        | 0.518          | 0.898(153)          | 0.886(2337)          | 0.131          | 0.203         |
| swed1.           | 0         | 0.98        | 0.59           | 0.904(2909)         | 0.908(2844)          | -0.0352        | 0.0653        |
| ukwa1.           | 0         | 0.99        | 0.093          | 0.883(2789)         | 0.895(2372)          | -0.108         | 0.0642        |
| usaw4.           | 0         | 0.98        | 0.192          | 0.897(256)          | 0.895(2950)          | 0.0783         | 0.06          |
| usaw5.           | 0         | 1.06        | 0.0425         | 0.883(1107)         | 0.903(1316)          | -0.192         | 0.0944        |
| deCODE.          | 0         | 1.00        | 0.109          | 0.880(1972)         | 0.880(192602)        | -0.0816        | 0.0509        |
| EstonianBiobank. | 1         | 1.00        | 0.0587         | 0.888(407)          | 0.910(17209)         | -0.213         | 0.113         |
| HUNT.            | 0         | 1.00        | 0.0582         | 0.861(905)          | 0.877(41914)         | -0.138         | 0.0731        |
| iPSYCH.          | 0         | 1.00        | 0.7            | 0.900(1758)         | 0.897(5937)          | 0.0246         | 0.0638        |
| UKBiobank.       | 0         | 1.00        | 0.135          | 0.880(1454)         | 0.889(58113)         | -0.234         | 0.156         |
| bmrom.           | 0         | 0.94        | 0.519          | 0.911(225)          | 0.926(121)           | -0.2           | 0.309         |
| bmrus.           | 0         | 1.05        | 0.68           | 0.920(522)          | 0.916(460)           | 0.067          | 0.162         |
| graza.           | 0         | 1.07        | 0.208          | 0.917(144)          | 0.886(66)            | 0.439          | 0.349         |
| greek.           | 0         | 0.97        | 0.371          | 0.926(186)          | 0.948(87)            | -0.364         | 0.407         |
| norgs.           | 0         | 0.92        | 0.0789         | 0.912(101)          | 0.869(315)           | 0.535          | 0.304         |
| noroe.           | 0         | 1.03        | 0.594          | 0.909(313)          | 0.896(4367)          | 0.0766         | 0.144         |
|                  | <b>12</b> | <b>1.00</b> | <b>3.3e-08</b> | <b>0.888(41917)</b> | <b>0.885(371549)</b> | <b>-0.0826</b> | <b>0.0149</b> |

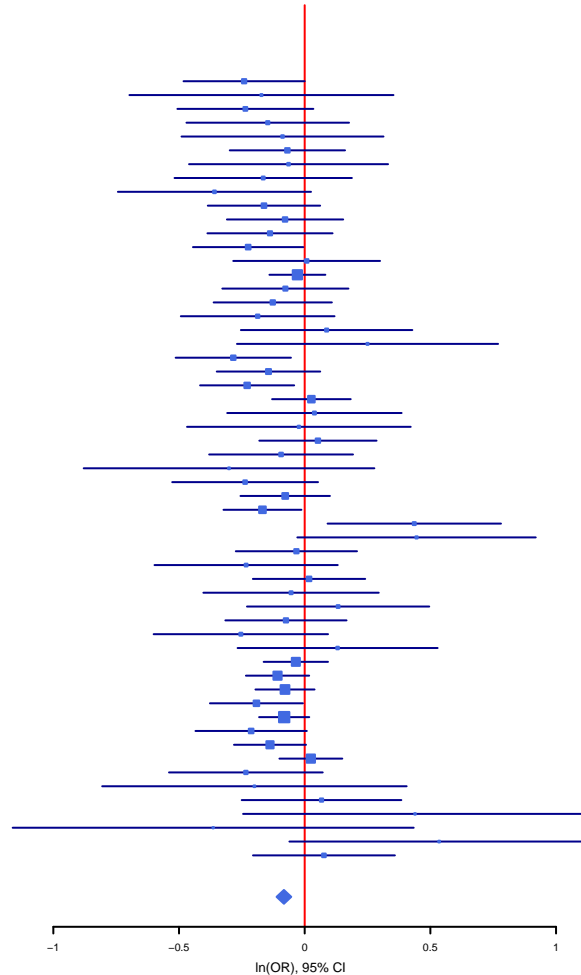

rs11062170

G/C

12:2348844

het\_P:

0.0352

het\_I:

26.9

|                  | ngt      | info        | p_value         | f_ca(n)             | f_co(n)              | ln(OR)         | STDerr        |
|------------------|----------|-------------|-----------------|---------------------|----------------------|----------------|---------------|
| bmau.            | 0        | 1.03        | 0.112           | 0.621(329)          | 0.655(1810)          | -0.139         | 0.0872        |
| bm2g.            | 0        | 1.03        | 0.649           | 0.677(181)          | 0.690(478)           | 0.0747         | 0.165         |
| bm3g.            | 0        | 1.02        | 0.301           | 0.685(489)          | 0.670(880)           | 0.0895         | 0.0865        |
| bmpo.            | 0        | 1.01        | 0.0515          | 0.665(410)          | 0.634(689)           | 0.197          | 0.101         |
| bmsp.            | 0        | 0.98        | 0.833           | 0.700(253)          | 0.725(291)           | -0.0323        | 0.153         |
| bonn.            | 0        | 1.01        | 0.37            | 0.667(669)          | 0.677(1246)          | -0.0655        | 0.0731        |
| butr.            | 0        | 1.02        | 0.00331         | 0.659(236)          | 0.748(236)           | -0.423         | 0.144         |
| dub1.            | 1        | 1.02        | 0.154           | 0.641(150)          | 0.642(796)           | -0.0769        | 0.131         |
| edf1.            | 0        | 1.06        | 0.65            | 0.656(275)          | 0.688(272)           | -0.06          | 0.132         |
| fat2.            | 0        | 1.01        | 0.893           | 0.668(722)          | 0.672(1027)          | -0.00995       | 0.0742        |
| fran.            | 0        | 0.98        | 0.00603         | 0.662(451)          | 0.702(1630)          | -0.228         | 0.083         |
| gain.            | 0        | 1.02        | 0.716           | 0.664(706)          | 0.667(593)           | -0.0305        | 0.0837        |
| gsk1.            | 0        | 0.99        | 0.552           | 0.642(706)          | 0.657(899)           | -0.0449        | 0.0755        |
| hal2.            | 0        | 1.01        | 0.423           | 0.651(410)          | 0.665(479)           | -0.0834        | 0.104         |
| icuk.            | 0        | 1.01        | 0.000581        | 0.638(2456)         | 0.670(4069)          | -0.131         | 0.0362        |
| jsf5.            | 0        | 1.00        | 0.0188          | 0.630(646)          | 0.673(643)           | -0.197         | 0.0837        |
| may1.            | 0        | 1.03        | 0.832           | 0.657(929)          | 0.658(759)           | -0.0158        | 0.0742        |
| mich.            | 0        | 1.02        | 0.641           | 0.666(481)          | 0.654(399)           | 0.0473         | 0.102         |
| pf1e.            | 0        | 1.01        | 0.418           | 0.663(375)          | 0.683(346)           | -0.0937        | 0.116         |
| rom3.            | 0        | 0.93        | 0.278           | 0.698(233)          | 0.677(198)           | 0.174          | 0.161         |
| st2c.            | 0        | 0.98        | 0.028           | 0.655(628)          | 0.696(1219)          | -0.173         | 0.0789        |
| stp1.            | 0        | 1.02        | 0.00873         | 0.643(920)          | 0.668(973)           | -0.163         | 0.0698        |
| swa2.            | 0        | 0.98        | 0.0199          | 0.635(865)          | 0.655(2252)          | -0.084         | 0.0619        |
| swei.            | 0        | 1.01        | 0.168           | 0.644(1278)         | 0.656(3669)          | -0.067         | 0.0486        |
| top7.            | 0        | 1.00        | 0.224           | 0.639(416)          | 0.651(350)           | -0.139         | 0.114         |
| top8.            | 0        | 1.01        | 0.204           | 0.666(148)          | 0.623(291)           | 0.195          | 0.154         |
| ucl2.            | 0        | 1.03        | 0.68            | 0.672(726)          | 0.681(693)           | -0.033         | 0.0802        |
| uclo.            | 0        | 0.96        | 0.0599          | 0.635(427)          | 0.675(488)           | -0.192         | 0.102         |
| uktr.            | 0        | 0.98        | 0.578           | 0.661(130)          | 0.638(130)           | 0.104          | 0.166         |
| umr4.            | 0        | 1.00        | 0.808           | 0.666(955)          | 0.659(569)           | 0.0217         | 0.0894        |
| usc2.            | 0        | 0.99        | 0.54            | 0.671(1293)         | 0.662(1156)          | 0.0383         | 0.0625        |
| wlcc.            | 0        | 1.01        | 0.0104          | 0.640(1644)         | 0.673(1641)          | -0.135         | 0.0528        |
| jea2.            | 0        | 0.98        | 0.268           | 0.648(372)          | 0.663(628)           | -0.111         | 0.101         |
| kfo4.            | 0        | 0.96        | 0.0464          | 0.656(247)          | 0.735(288)           | -0.292         | 0.147         |
| tgco2.           | 0        | 0.98        | 0.0506          | 0.668(1032)         | 0.703(499)           | -0.168         | 0.0858        |
| bdtrs.           | 0        | 1.01        | 0.323           | 0.682(218)          | 0.653(684)           | 0.118          | 0.12          |
| dutch.           | 0        | 0.99        | 0.474           | 0.670(831)          | 0.681(953)           | -0.052         | 0.0727        |
| gawil.           | 0        | 1.02        | 0.121           | 0.674(252)          | 0.674(252)           | -0.137         | 0.118         |
| germ1.           | 0        | 0.96        | 0.727           | 0.677(219)          | 0.686(992)           | -0.0412        | 0.118         |
| gpcw1.           | 0        | 1.01        | 0.0123          | 0.636(447)          | 0.680(2092)          | -0.194         | 0.0774        |
| neuc1.           | 0        | 1.00        | 0.592           | 0.661(215)          | 0.676(750)           | -0.0634        | 0.118         |
| spsp3.           | 0        | 1.02        | 0.596           | 0.715(153)          | 0.724(2337)          | -0.0694        | 0.131         |
| swed1.           | 0        | 0.99        | 0.00445         | 0.632(2909)         | 0.659(2844)          | -0.113         | 0.0399        |
| ukwa1.           | 0        | 1.02        | 0.000151        | 0.627(2789)         | 0.664(2372)          | -0.157         | 0.0416        |
| usaaw.           | 0        | 1.01        | 0.041           | 0.666(256)          | 0.684(2930)          | -0.0781        | 0.0396        |
| usaaw5.          | 0        | 1.01        | 0.414           | 0.664(1107)         | 0.684(1316)          | -0.0523        | 0.0641        |
| deCODE.          | 0        | 1.00        | 0.428           | 0.675(1972)         | 0.675(192602)        | -0.0276        | 0.0349        |
| EstonianBiobank. | 1        | 1.00        | 0.723           | 0.615(407)          | 0.630(17209)         | -0.0261        | 0.0737        |
| HUNT.            | 0        | 1.00        | 0.0802          | 0.617(905)          | 0.637(41914)         | -0.0878        | 0.0502        |
| iPSYCH.          | 0        | 1.01        | 0.594           | 0.650(1758)         | 0.654(5937)          | -0.0213        | 0.0401        |
| UKBiobank.       | 0        | 1.00        | 0.0682          | 0.652(1454)         | 0.669(58113)         | -0.3           | 0.165         |
| bmron.           | 0        | 1.04        | 0.74            | 0.668(252)          | 0.721(121)           | -0.239         | 0.176         |
| bmrus.           | 0        | 0.97        | 0.625           | 0.645(522)          | 0.635(460)           | 0.0476         | 0.0972        |
| graza.           | 0        | 1.00        | 0.00494         | 0.632(144)          | 0.772(66)            | -0.701         | 0.249         |
| greek.           | 0        | 1.02        | 0.474           | 0.722(186)          | 0.753(87)            | -0.151         | 0.21          |
| norgs.           | 0        | 1.02        | 0.847           | 0.648(101)          | 0.621(315)           | 0.0343         | 0.178         |
| noroe.           | 0        | 1.01        | 0.65            | 0.656(313)          | 0.656(4367)          | -0.0404        | 0.0891        |
|                  | <b>1</b> | <b>1.00</b> | <b>1.87e-15</b> | <b>0.652(41917)</b> | <b>0.667(371549)</b> | <b>-0.0779</b> | <b>0.0098</b> |

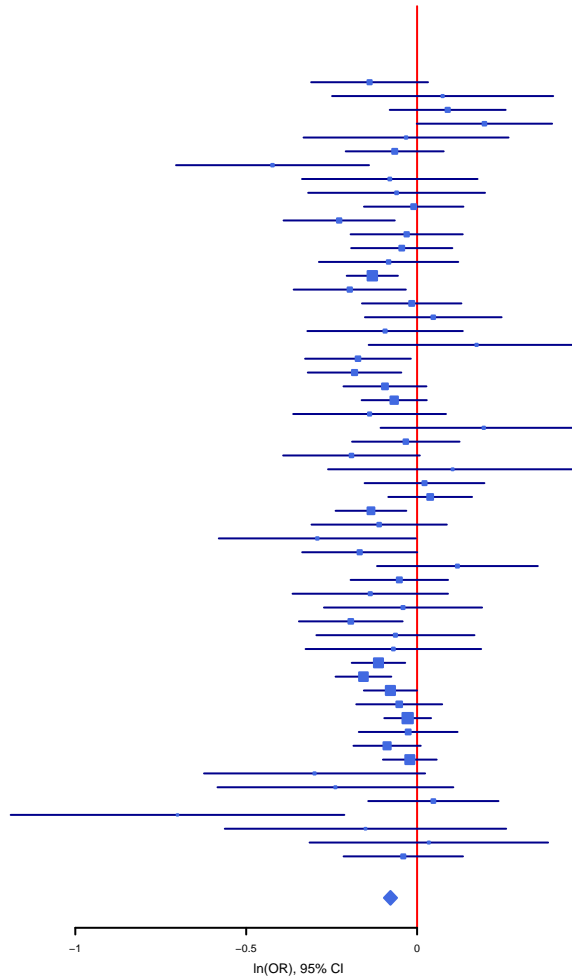

rs35306827

G/A

13:113869045

het\_P: 0.684

het\_I: 0.0

|                  | ngt | info | p_value | f_ca(n)     | f_co(n)       | ln(OR)   | STDerr |
|------------------|-----|------|---------|-------------|---------------|----------|--------|
| bmau.            | 0   | 0.97 | 0.276   | 0.793(329)  | 0.771(1810)   | 0.116    | 0.106  |
| bm2g.            | 0   | 1.01 | 0.407   | 0.741(181)  | 0.745(478)    | -0.147   | 0.177  |
| bm3.             | 0   | 0.95 | 0.588   | 0.758(489)  | 0.756(880)    | 0.0558   | 0.0977 |
| bmpo.            | 0   | 0.98 | 0.678   | 0.706(410)  | 0.693(689)    | 0.0436   | 0.105  |
| bmsp.            | 0   | 0.93 | 0.166   | 0.817(253)  | 0.786(291)    | 0.248    | 0.179  |
| bonn.            | 0   | 0.99 | 0.212   | 0.771(669)  | 0.748(1246)   | 0.103    | 0.0822 |
| butr.            | 0   | 1.02 | 0.0809  | 0.792(236)  | 0.720(236)    | 0.26     | 0.149  |
| dub1.            | 0   | 0.99 | 0.96    | 0.787(150)  | 0.787(150)    | 0.029    | 0.16   |
| edf1.            | 0   | 1.04 | 0.195   | 0.797(275)  | 0.757(272)    | 0.194    | 0.149  |
| fat2.            | 0   | 1.01 | 0.617   | 0.777(722)  | 0.768(1027)   | 0.0416   | 0.0832 |
| fran.            | 0   | 0.98 | 0.626   | 0.797(451)  | 0.784(1630)   | 0.0466   | 0.0956 |
| gain.            | 0   | 1.02 | 0.847   | 0.775(706)  | 0.770(593)    | 0.018    | 0.0936 |
| gsk1.            | 0   | 0.98 | 0.0994  | 0.795(706)  | 0.769(899)    | 0.146    | 0.0885 |
| hai2.            | 0   | 0.96 | 0.0417  | 0.792(410)  | 0.760(479)    | 0.249    | 0.122  |
| icuk.            | 0   | 0.98 | 0.0988  | 0.789(2456) | 0.773(4069)   | 0.0738   | 0.0447 |
| js15.            | 0   | 0.98 | 0.105   | 0.778(646)  | 0.750(643)    | 0.155    | 0.0955 |
| may1.            | 0   | 0.93 | 0.898   | 0.764(929)  | 0.760(759)    | 0.0111   | 0.0869 |
| mich.            | 0   | 1.06 | 0.666   | 0.781(481)  | 0.768(399)    | 0.0489   | 0.113  |
| pf1e.            | 0   | 0.94 | 0.0638  | 0.790(375)  | 0.750(346)    | 0.247    | 0.133  |
| rom3.            | 0   | 1.00 | 0.377   | 0.704(233)  | 0.672(198)    | 0.136    | 0.154  |
| st2c.            | 0   | 1.02 | 0.0479  | 0.791(628)  | 0.772(1219)   | 0.174    | 0.0879 |
| stp1.            | 0   | 0.98 | 0.652   | 0.755(920)  | 0.759(973)    | -0.0351  | 0.0778 |
| swa2.            | 0   | 1.00 | 0.98    | 0.769(865)  | 0.753(2252)   | 0.0428   | 0.069  |
| swei.            | 0   | 1.03 | 0.139   | 0.765(1278) | 0.751(3669)   | 0.0799   | 0.054  |
| top7.            | 0   | 0.95 | 0.0171  | 0.809(416)  | 0.753(350)    | 0.326    | 0.137  |
| top8.            | 0   | 0.92 | 0.744   | 0.761(148)  | 0.778(291)    | -0.0593  | 0.182  |
| ucl2.            | 0   | 0.99 | 0.479   | 0.766(726)  | 0.751(693)    | 0.0629   | 0.0889 |
| uclo.            | 0   | 0.98 | 0.302   | 0.759(427)  | 0.778(488)    | -0.117   | 0.114  |
| uktr.            | 0   | 1.10 | 0.661   | 0.836(130)  | 0.820(130)    | 0.0972   | 0.222  |
| umr4.            | 0   | 0.92 | 0.44    | 0.805(565)  | 0.795(569)    | 0.0853   | 0.111  |
| usc2.            | 0   | 0.99 | 0.503   | 0.780(1293) | 0.770(1156)   | 0.0473   | 0.0705 |
| wlcc.            | 0   | 0.99 | 0.305   | 0.774(1644) | 0.766(1641)   | 0.0618   | 0.0603 |
| jea2.            | 0   | 0.99 | 0.21    | 0.679(372)  | 0.656(628)    | 0.126    | 0.101  |
| kfo4.            | 0   | 0.97 | 0.241   | 0.773(247)  | 0.765(288)    | 0.186    | 0.159  |
| tgco2.           | 0   | 1.00 | 0.379   | 0.762(1032) | 0.780(499)    | -0.0825  | 0.0937 |
| bdrs.            | 0   | 0.96 | 0.36    | 0.790(218)  | 0.768(684)    | 0.126    | 0.138  |
| dutch.           | 0   | 0.97 | 0.941   | 0.757(831)  | 0.762(953)    | -0.00602 | 0.0806 |
| gaw4.            | 0   | 0.96 | 0.96    | 0.770(268)  | 0.762(262)    | 0.0233   | 0.131  |
| germ1.           | 0   | 0.99 | 0.541   | 0.739(219)  | 0.730(992)    | 0.0761   | 0.124  |
| gpcw1.           | 0   | 0.97 | 0.259   | 0.759(447)  | 0.777(2092)   | -0.1     | 0.0887 |
| neuc1.           | 0   | 1.00 | 0.716   | 0.799(215)  | 0.792(750)    | 0.0508   | 0.14   |
| spsp3.           | 0   | 0.99 | 0.524   | 0.817(153)  | 0.802(2337)   | 0.0987   | 0.155  |
| swed1.           | 0   | 0.98 | 0.781   | 0.760(2909) | 0.758(2844)   | 0.0124   | 0.0446 |
| ukwa1.           | 0   | 0.98 | 0.348   | 0.779(2789) | 0.770(2372)   | 0.0452   | 0.0481 |
| usa7.            | 0   | 1.00 | 0.0953  | 0.783(2956) | 0.781(2930)   | 0.0755   | 0.0453 |
| usaw5.           | 0   | 1.01 | 0.892   | 0.773(1107) | 0.777(1316)   | -0.00975 | 0.0715 |
| deCODE.          | 0   | 1.00 | 0.00732 | 0.787(1972) | 0.787(192602) | 0.114    | 0.0426 |
| EstonianBiobank. | 1   | 0.97 | 0.303   | 0.703(407)  | 0.683(17209)  | 0.082    | 0.0796 |
| HUNT.            | 0   | 0.99 | 0.632   | 0.783(905)  | 0.779(41914)  | 0.0279   | 0.0582 |
| iPSYCH.          | 0   | 0.95 | 0.198   | 0.770(1758) | 0.760(5937)   | 0.0601   | 0.0466 |
| UKBiobank.       | 0   | 1.00 | 0.595   | 0.778(1454) | 0.773(58113)  | 0.094    | 0.177  |
| bmron.           | 0   | 0.99 | 0.96    | 0.719(225)  | 0.714(121)    | 0.0319   | 0.81   |
| bmrus.           | 0   | 0.93 | 0.0114  | 0.698(522)  | 0.641(460)    | 0.258    | 0.102  |
| graza.           | 0   | 1.06 | 0.234   | 0.751(144)  | 0.696(66)     | 0.278    | 0.233  |
| greek.           | 0   | 0.91 | 0.00335 | 0.802(186)  | 0.698(87)     | 0.679    | 0.232  |
| norgs.           | 0   | 0.99 | 0.0952  | 0.814(101)  | 0.754(315)    | 0.366    | 0.219  |
| noroe.           | 0   | 0.97 | 0.45    | 0.743(313)  | 0.767(4367)   | -0.0752  | 0.0995 |

1 0.99 3.56e-09 0.773(41917) 0.775(371549) 0.0659 0.0112

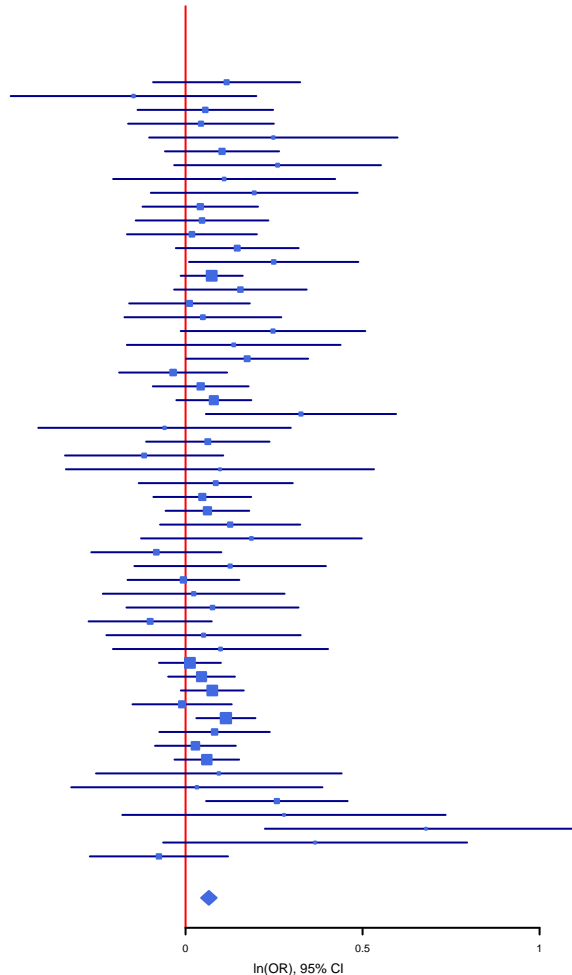

rs2693698

A/G

14:99719219

het\_P:

0.921

het\_I:

0.0

|                  | ngt         | info            | p_value             | f_ca(n)              | f_co(n)       | ln(OR)        | STDerr |
|------------------|-------------|-----------------|---------------------|----------------------|---------------|---------------|--------|
| bmau.            | 1           | 1.07            | 0.906               | 0.460(329)           | 0.455(1810)   | 0.00975       | 0.0828 |
| bmq2.            | 1           | 0.95            | 0.187               | 0.403(181)           | 0.446(478)    | -0.217        | 0.165  |
| bmq3.            | 1           | 0.98            | 0.961               | 0.438(489)           | 0.442(880)    | -0.00411      | 0.0831 |
| bmpo.            | 1           | 1.04            | 0.414               | 0.455(410)           | 0.435(689)    | 0.0771        | 0.0943 |
| bmsp.            | 1           | 1.00            | 0.266               | 0.458(253)           | 0.482(291)    | -0.152        | 0.136  |
| bonn.            | 1           | 1.04            | 0.228               | 0.433(669)           | 0.456(1246)   | -0.0825       | 0.0685 |
| butr.            | 1           | 1.03            | 0.651               | 0.430(236)           | 0.445(236)    | -0.0585       | 0.129  |
| dub1.            | 0           | 0.90            | 0.295               | 0.429(150)           | 0.462(796)    | -0.164        | 0.135  |
| edf1.            | 0           | 0.90            | 0.313               | 0.439(275)           | 0.484(272)    | -0.195        | 0.133  |
| fat2.            | 0           | 0.90            | 0.669               | 0.417(722)           | 0.429(1027)   | -0.0319       | 0.0748 |
| fran.            | 1           | 0.95            | 0.219               | 0.447(451)           | 0.464(1630)   | -0.0972       | 0.079  |
| gain.            | 0           | 0.91            | 0.866               | 0.435(706)           | 0.442(593)    | -0.0142       | 0.0839 |
| gsk1.            | 1           | 0.99            | 0.657               | 0.441(706)           | 0.449(899)    | -0.032        | 0.0723 |
| hai2.            | 1           | 1.03            | 0.159               | 0.421(410)           | 0.453(479)    | -0.139        | 0.0986 |
| icuk.            | 1           | 0.99            | 0.125               | 0.449(2456)          | 0.463(4069)   | -0.0567       | 0.037  |
| jst5.            | 1           | 0.98            | 0.499               | 0.440(646)           | 0.453(643)    | -0.0548       | 0.0907 |
| may1.            | 1           | 0.98            | 0.829               | 0.445(929)           | 0.450(759)    | -0.0156       | 0.0722 |
| mich.            | 1           | 0.98            | 0.867               | 0.435(481)           | 0.435(399)    | 0.0166        | 0.0983 |
| pf1e.            | 1           | 1.02            | 0.585               | 0.450(375)           | 0.465(346)    | -0.0588       | 0.108  |
| rom3.            | 1           | 0.98            | 0.96                | 0.440(233)           | 0.447(198)    | 0.00727       | 0.145  |
| st2c.            | 0           | 0.88            | 0.869               | 0.443(628)           | 0.453(1219)   | 0.0129        | 0.0781 |
| stp1.            | 0           | 0.93            | 0.161               | 0.416(920)           | 0.443(973)    | -0.0972       | 0.0693 |
| swa2.            | 0           | 0.96            | 0.96                | 0.439(895)           | 0.439(895)    | 0.0076        | 0.062  |
| swei.            | 1           | 0.98            | 0.0471              | 0.425(1278)          | 0.453(3669)   | -0.0948       | 0.0477 |
| top7.            | 0           | 1.00            | 0.461               | 0.460(416)           | 0.431(350)    | 0.0813        | 0.11   |
| top8.            | 1           | 1.06            | 0.372               | 0.460(148)           | 0.436(291)    | 0.128         | 0.144  |
| ucl2.            | 1           | 0.99            | 0.105               | 0.455(726)           | 0.485(693)    | -0.124        | 0.0762 |
| uclo.            | 0           | 0.93            | 0.138               | 0.463(427)           | 0.435(488)    | 0.151         | 0.102  |
| uktr.            | 1           | 1.04            | 0.543               | 0.419(130)           | 0.446(130)    | -0.106        | 0.174  |
| umr4.            | 1           | 1.01            | 0.539               | 0.417(565)           | 0.428(569)    | -0.0525       | 0.0855 |
| usc2.            | 1           | 1.00            | 0.26                | 0.422(1293)          | 0.433(1156)   | -0.0672       | 0.0596 |
| wlcc.            | 0           | 0.87            | 0.0928              | 0.446(1644)          | 0.467(1641)   | -0.0912       | 0.0543 |
| jea2.            | 1           | 0.99            | 0.553               | 0.426(372)           | 0.437(628)    | -0.0566       | 0.0955 |
| kfo4.            | 1           | 0.95            | 0.461               | 0.435(247)           | 0.462(288)    | -0.1          | 0.136  |
| tgco2.           | 0           | 0.90            | 0.066               | 0.426(1032)          | 0.464(499)    | -0.153        | 0.083  |
| bdrs.            | 1           | 1.02            | 0.74                | 0.447(218)           | 0.461(684)    | -0.0369       | 0.111  |
| dutch.           | 1           | 1.00            | 0.452               | 0.465(831)           | 0.453(953)    | 0.0512        | 0.0681 |
| gaw1.            | 1           | 1.03            | 0.946               | 0.429(268)           | 0.430(502)    | 0.00727       | 0.138  |
| germ1.           | 1           | 1.01            | 0.00173             | 0.393(219)           | 0.474(992)    | -0.349        | 0.112  |
| gpcw1.           | 1           | 1.00            | 0.0611              | 0.414(447)           | 0.451(2092)   | -0.141        | 0.0753 |
| neuc1.           | 1           | 0.98            | 0.906               | 0.433(215)           | 0.433(750)    | 0.0135        | 0.114  |
| spsp3.           | 1           | 0.97            | 0.202               | 0.458(153)           | 0.494(2337)   | -0.154        | 0.121  |
| swed1.           | 1           | 1.00            | 0.0757              | 0.432(2909)          | 0.448(2844)   | -0.0677       | 0.0382 |
| ukwa1.           | 1           | 1.01            | 0.0915              | 0.443(2789)          | 0.462(2372)   | -0.0675       | 0.04   |
| usa4.            | 1           | 1.02            | 0.412               | 0.441(2956)          | 0.450(2956)   | -0.0303       | 0.0369 |
| usaw5.           | 1           | 1.01            | 0.431               | 0.449(1107)          | 0.441(1316)   | 0.0475        | 0.0602 |
| deCODE.          | 0           | 1.00            | 0.11                | 0.444(1972)          | 0.444(192602) | -0.0534       | 0.0334 |
| EstonianBiobank. | 1           | 0.98            | 0.228               | 0.462(407)           | 0.471(17209)  | -0.0876       | 0.0726 |
| HUNT.            | 0           | 0.98            | 0.0687              | 0.412(905)           | 0.433(41914)  | -0.0897       | 0.0493 |
| iPSYCH.          | 1           | 1.01            | 0.178               | 0.466(1758)          | 0.479(5937)   | -0.0518       | 0.0384 |
| UKBiobank.       | 0           | 1.00            | 0.289               | 0.449(1454)          | 0.460(58113)  | -0.184        | 0.174  |
| bmron.           | 1           | 0.99            | 0.965               | 0.403(225)           | 0.409(121)    | 0.149         | 0.165  |
| bmrus.           | 1           | 0.96            | 0.965               | 0.430(522)           | 0.436(460)    | 0.00409       | 0.0947 |
| graza.           | 1           | 1.01            | 0.171               | 0.389(144)           | 0.462(66)     | -0.297        | 0.217  |
| greek.           | 1           | 0.96            | 0.303               | 0.481(186)           | 0.528(87)     | -0.198        | 0.192  |
| norgs.           | 1           | 0.99            | 0.752               | 0.426(101)           | 0.440(315)    | -0.055        | 0.174  |
| noroe.           | 1           | 1.01            | 0.73                | 0.439(313)           | 0.457(4367)   | -0.0294       | 0.0851 |
| <b>43</b>        | <b>0.98</b> | <b>1.96e-08</b> | <b>0.440(41917)</b> | <b>0.449(371549)</b> | <b>-0.053</b> | <b>0.0094</b> |        |

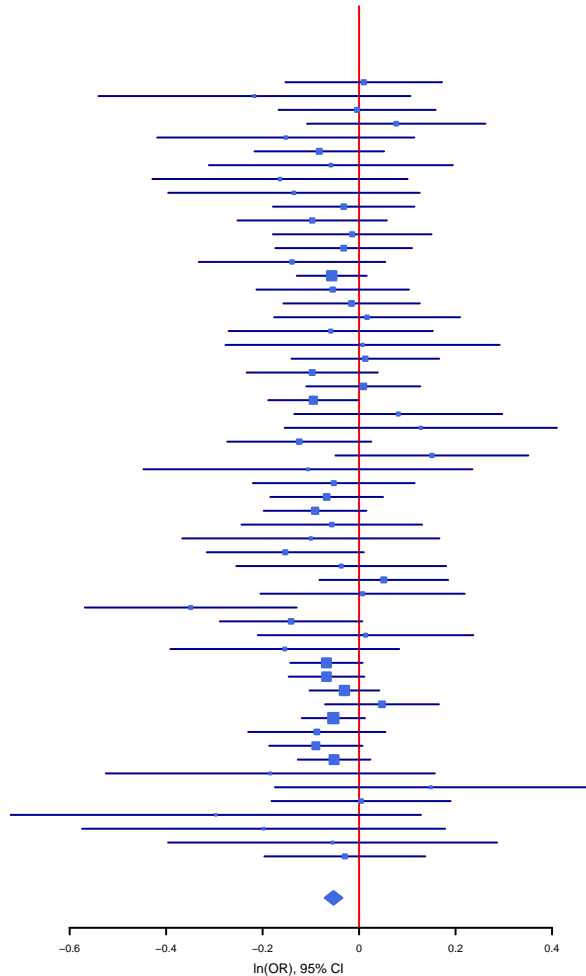

rs35958438

G/A

15:38973793  
het\_P:

0.235

het\_I:

11.6

|                  | ngt         | info            | p_value             | f_ca(n)              | f_co(n)       | ln(OR)        | STDerr |
|------------------|-------------|-----------------|---------------------|----------------------|---------------|---------------|--------|
| bmau.            | 0           | 0.99            | 0.482               | 0.802(329)           | 0.789(1810)   | 0.0755        | 0.107  |
| bm2.             | 0           | 0.99            | 0.815               | 0.762(181)           | 0.775(478)    | 0.0445        | 0.19   |
| bm3.             | 0           | 1.01            | 0.0468              | 0.779(489)           | 0.745(880)    | -0.192        | 0.0963 |
| bm4.             | 0           | 0.99            | 0.139               | 0.784(410)           | 0.784(869)    | 0.119         | 0.15   |
| bm5p.            | 0           | 1.02            | 0.674               | 0.783(253)           | 0.784(291)    | -0.0692       | 0.165  |
| bonn.            | 0           | 1.01            | 0.87                | 0.773(669)           | 0.774(1246)   | -0.0135       | 0.0827 |
| butr.            | 0           | 0.92            | 0.0563              | 0.772(236)           | 0.820(236)    | -0.325        | 0.17   |
| dub1.            | 0           | 0.98            | 0.643               | 0.789(150)           | 0.779(796)    | 0.0724        | 0.156  |
| ed1.             | 0           | 0.97            | 0.574               | 0.785(275)           | 0.753(272)    | 0.0867        | 0.154  |
| fat2.            | 0           | 1.01            | 0.158               | 0.798(722)           | 0.774(1027)   | 0.121         | 0.0855 |
| fran.            | 0           | 0.97            | 0.0377              | 0.766(451)           | 0.794(1630)   | -0.193        | 0.0931 |
| gain.            | 0           | 0.99            | 0.112               | 0.787(706)           | 0.759(593)    | 0.152         | 0.0953 |
| gsk1.            | 0           | 1.01            | 0.0516              | 0.791(706)           | 0.764(899)    | 0.168         | 0.0861 |
| hal2.            | 0           | 1.02            | 0.392               | 0.807(410)           | 0.788(479)    | 0.105         | 0.122  |
| icuk.            | 0           | 1.02            | 0.00211             | 0.789(2456)          | 0.763(4069)   | 0.134         | 0.0437 |
| jst5.            | 0           | 0.96            | 0.58                | 0.783(646)           | 0.773(643)    | 0.0539        | 0.0976 |
| may1.            | 0           | 0.99            | 0.034               | 0.777(929)           | 0.748(759)    | 0.179         | 0.0843 |
| mich.            | 0           | 1.04            | 0.31                | 0.802(481)           | 0.783(399)    | 0.118         | 0.117  |
| pf1.             | 0           | 1.07            | 0.0433              | 0.796(375)           | 0.754(348)    | 0.256         | 0.127  |
| rom3.            | 0           | 1.09            | 0.258               | 0.780(233)           | 0.762(198)    | 0.185         | 0.164  |
| st2c.            | 0           | 0.98            | 0.423               | 0.776(628)           | 0.794(1219)   | -0.0712       | 0.0888 |
| stp1.            | 0           | 0.97            | 0.000125            | 0.805(920)           | 0.756(973)    | 0.315         | 0.082  |
| swa2.            | 0           | 0.97            | 0.535               | 0.764(885)           | 0.772(2252)   | -0.0438       | 0.0708 |
| swei.            | 0           | 0.99            | 0.575               | 0.770(1278)          | 0.763(3669)   | 0.0312        | 0.0557 |
| top7.            | 0           | 0.96            | 0.862               | 0.782(416)           | 0.783(350)    | 0.0233        | 0.134  |
| top8.            | 0           | 0.95            | 0.203               | 0.793(148)           | 0.746(291)    | 0.231         | 0.181  |
| ucl2.            | 0           | 0.97            | 0.162               | 0.774(726)           | 0.753(693)    | 0.127         | 0.0906 |
| uclo.            | 0           | 0.99            | 0.376               | 0.788(427)           | 0.798(488)    | -0.105        | 0.118  |
| uktr.            | 0           | 0.98            | 0.178               | 0.831(130)           | 0.784(130)    | 0.305         | 0.227  |
| ume4.            | 0           | 1.02            | 0.84                | 0.789(565)           | 0.791(569)    | -0.0207       | 0.103  |
| usc2.            | 0           | 0.98            | 0.112               | 0.803(1293)          | 0.781(1156)   | 0.117         | 0.0733 |
| wtoc.            | 0           | 1.03            | 0.0567              | 0.788(1644)          | 0.770(1641)   | 0.114         | 0.06   |
| jea2.            | 0           | 0.99            | 0.352               | 0.769(372)           | 0.789(628)    | -0.106        | 0.114  |
| kfo4.            | 0           | 0.96            | 0.941               | 0.757(247)           | 0.762(288)    | 0.0114        | 0.156  |
| tgco2.           | 0           | 0.99            | 0.852               | 0.785(1032)          | 0.780(499)    | 0.0177        | 0.0952 |
| bdtrs.           | 0           | 1.02            | 0.899               | 0.770(218)           | 0.760(684)    | 0.0167        | 0.132  |
| dutch.           | 0           | 1.01            | 0.709               | 0.760(831)           | 0.753(953)    | 0.0295        | 0.0788 |
| gawli.           | 0           | 0.98            | 0.136               | 0.786(268)           | 0.747(502)    | 0.196         | 0.132  |
| germ1.           | 0           | 0.97            | 0.156               | 0.803(219)           | 0.775(992)    | 0.195         | 0.138  |
| gpcw1.           | 0           | 1.01            | 0.804               | 0.777(447)           | 0.782(2092)   | -0.022        | 0.0888 |
| neuc1.           | 0           | 1.01            | 0.287               | 0.798(215)           | 0.772(750)    | 0.142         | 0.136  |
| spsp3.           | 0           | 0.98            | 0.508               | 0.818(153)           | 0.806(2337)   | 0.104         | 0.158  |
| swed1.           | 0           | 1.00            | 0.272               | 0.769(2909)          | 0.761(2844)   | 0.049         | 0.0446 |
| ukwa1.           | 0           | 0.99            | 0.472               | 0.781(2789)          | 0.773(2372)   | 0.0346        | 0.0481 |
| usaw4.           | 0           | 0.96            | 0.0258              | 0.799(2956)          | 0.783(2930)   | 0.104         | 0.0465 |
| usaw5.           | 0           | 0.95            | 0.992               | 0.780(1107)          | 0.782(1316)   | 0.0007        | 0.0744 |
| EstonianBiobank. | 1           | 1.00            | 0.543               | 0.781(407)           | 0.774(17209)  | 0.0525        | 0.0862 |
| HUNT.            | 0           | 1.00            | 0.204               | 0.785(905)           | 0.775(1914)   | 0.0731        | 0.0576 |
| iPSYCH.          | 0           | 0.99            | 0.891               | 0.755(1758)          | 0.754(5937)   | 0.00618       | 0.045  |
| UKBiobank.       | 0           | 1.00            | 0.509               | 0.768(1454)          | 0.771(58113)  | -0.11         | 0.166  |
| bmrom.           | 0           | 0.99            | 0.939               | 0.784(225)           | 0.781(121)    | 0.0153        | 0.198  |
| bmrus.           | 0           | 0.97            | 0.46                | 0.787(522)           | 0.770(460)    | 0.0827        | 0.112  |
| graza.           | 0           | 0.92            | 0.42                | 0.777(144)           | 0.807(66)     | -0.228        | 0.283  |
| greek.           | 0           | 0.90            | 0.113               | 0.817(186)           | 0.763(87)     | 0.385         | 0.243  |
| horgs.           | 0           | 0.94            | 0.646               | 0.788(101)           | 0.773(315)    | 0.097         | 0.211  |
| noroe.           | 0           | 1.02            | 0.795               | 0.778(313)           | 0.774(4367)   | -0.0261       | 0.101  |
| <b>1</b>         | <b>0.99</b> | <b>3.83e-08</b> | <b>0.782(41917)</b> | <b>0.772(371549)</b> | <b>0.0642</b> | <b>0.0117</b> |        |

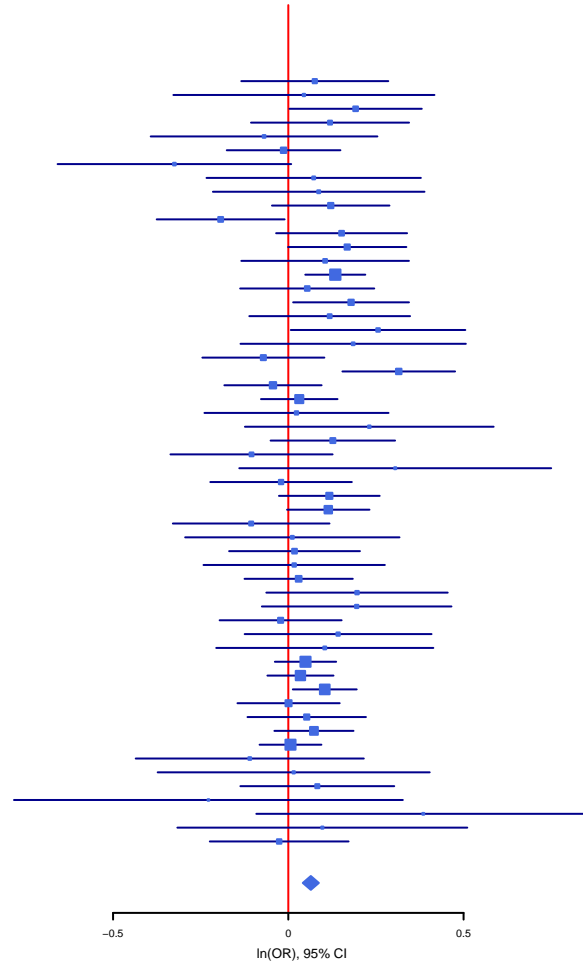



rs4447398

A/C

15:42904904

het\_P:

0.232

het\_I:

11.7

|                  | ngt      | info        | p_value         | f_ca(n)             | f_co(n)              | ln(OR)        | STDerr        |
|------------------|----------|-------------|-----------------|---------------------|----------------------|---------------|---------------|
| bmau.            | 0        | 1.04        | 0.233           | 0.157(329)          | 0.139(1810)          | 0.138         | 0.116         |
| bm2g.            | 0        | 0.96        | 0.694           | 0.127(181)          | 0.138(478)           | 0.0945        | 0.241         |
| bm3.             | 0        | 0.98        | 0.714           | 0.125(489)          | 0.132(880)           | -0.0453       | 0.123         |
| bmpp.            | 0        | 1.00        | 0.214           | 0.129(410)          | 0.100(689)           | 0.183         | 0.147         |
| bmsp.            | 0        | 1.00        | 0.0769          | 0.137(253)          | 0.100(291)           | 0.374         | 0.211         |
| bonn.            | 0        | 1.00        | 0.583           | 0.141(662)          | 0.134(1246)          | 0.0552        | 0.101         |
| butr.            | 0        | 0.96        | 0.808           | 0.154(236)          | 0.148(236)           | 0.045         | 0.185         |
| dub1.            | 0        | 0.93        | 0.653           | 0.118(756)          | 0.129(796)           | -0.0684       | 0.103         |
| edf1.            | 0        | 0.93        | 0.0587          | 0.161(275)          | 0.135(272)           | 0.358         | 0.189         |
| fat2.            | 0        | 1.05        | 0.0722          | 0.146(722)          | 0.126(1027)          | 0.18          | 0.0999        |
| fran.            | 0        | 1.04        | 0.442           | 0.133(451)          | 0.120(1630)          | 0.0858        | 0.112         |
| gain.            | 0        | 1.00        | 0.233           | 0.143(706)          | 0.128(593)           | 0.139         | 0.117         |
| gsk1.            | 0        | 0.98        | 0.0577          | 0.149(706)          | 0.127(899)           | 0.199         | 0.105         |
| hal2.            | 0        | 0.91        | 0.31            | 0.158(410)          | 0.146(479)           | 0.146         | 0.144         |
| icuk.            | 0        | 0.95        | 3.48e-05        | 0.148(2456)         | 0.124(4069)          | 0.225         | 0.0542        |
| js15.            | 0        | 0.95        | 0.382           | 0.133(646)          | 0.121(643)           | 0.107         | 0.122         |
| may1.            | 0        | 1.00        | 0.193           | 0.147(929)          | 0.127(759)           | 0.136         | 0.104         |
| mich.            | 0        | 0.99        | 0.551           | 0.132(481)          | 0.143(399)           | -0.084        | 0.141         |
| pf1e.            | 0        | 0.96        | 0.216           | 0.142(375)          | 0.121(346)           | 0.204         | 0.165         |
| rom3.            | 0        | 1.01        | 0.178           | 0.190(233)          | 0.157(198)           | 0.256         | 0.19          |
| si2c.            | 0        | 0.99        | 0.941           | 0.144(628)          | 0.141(1219)          | -0.00783      | 0.105         |
| stp1.            | 0        | 0.97        | 0.0364          | 0.151(920)          | 0.127(973)           | 0.203         | 0.0971        |
| swa2.            | 0        | 0.99        | 0.721           | 0.109(865)          | 0.118(2252)          | 0.0332        | 0.0931        |
| swei.            | 0        | 0.98        | 0.747           | 0.117(1278)         | 0.112(3669)          | -0.0238       | 0.0739        |
| top7.            | 0        | 0.97        | 0.0567          | 0.122(416)          | 0.094(350)           | 0.343         | 0.18          |
| top8.            | 0        | 0.97        | 0.893           | 0.118(148)          | 0.122(291)           | -0.0308       | 0.23          |
| ucl2.            | 0        | 0.98        | 0.0796          | 0.144(726)          | 0.118(693)           | 0.2           | 0.114         |
| ucio.            | 0        | 0.99        | 0.985           | 0.147(427)          | 0.145(488)           | 0.0026        | 0.136         |
| uktr.            | 0        | 0.89        | 0.273           | 0.112(130)          | 0.085(130)           | 0.345         | 0.315         |
| umr4.            | 0        | 0.98        | 0.189           | 0.119(565)          | 0.100(569)           | 0.18          | 0.137         |
| usc2.            | 0        | 1.03        | 0.397           | 0.145(1293)         | 0.136(1156)          | 0.0707        | 0.0835        |
| wlcc.            | 0        | 0.99        | 0.824           | 0.134(1644)         | 0.131(1641)          | 0.0166        | 0.0746        |
| jea2.            | 0        | 0.95        | 0.678           | 0.124(372)          | 0.115(628)           | 0.0618        | 0.149         |
| kfo4.            | 0        | 0.97        | 0.786           | 0.127(247)          | 0.126(288)           | -0.054        | 0.199         |
| tgco2.           | 0        | 1.00        | 0.876           | 0.141(1032)         | 0.143(499)           | 0.0174        | 0.112         |
| bdrs.            | 0        | 0.96        | 0.313           | 0.156(218)          | 0.136(684)           | 0.163         | 0.161         |
| dutch.           | 1        | 1.00        | 0.0659          | 0.151(831)          | 0.132(953)           | 0.18          | 0.0976        |
| gawii.           | 0        | 0.96        | 0.0251          | 0.117(268)          | 0.138(502)           | -0.371        | 0.166         |
| germ1.           | 0        | 0.98        | 0.805           | 0.130(219)          | 0.131(992)           | 0.0404        | 0.164         |
| gpcw1.           | 0        | 0.99        | 0.404           | 0.153(447)          | 0.142(2092)          | 0.0867        | 0.104         |
| neuc1.           | 0        | 1.02        | 0.492           | 0.119(215)          | 0.132(750)           | -0.117        | 0.17          |
| spsp3.           | 0        | 0.99        | 0.945           | 0.112(153)          | 0.113(2337)          | 0.013         | 0.189         |
| swed1.           | 0        | 1.00        | 0.0776          | 0.121(2909)         | 0.114(2844)          | 0.104         | 0.0592        |
| ukwa1.           | 0        | 0.93        | 0.218           | 0.143(2789)         | 0.135(2372)          | 0.0734        | 0.0596        |
| usa4.            | 0        | 0.99        | 0.652           | 0.139(256)          | 0.138(2930)          | 0.00678       | 0.0539        |
| usa5.            | 0        | 0.97        | 0.367           | 0.143(1107)         | 0.132(1316)          | 0.0796        | 0.0882        |
| deCODE.          | 0        | 1.00        | 0.0478          | 0.136(1972)         | 0.136(192602)        | 0.0944        | 0.0477        |
| EstonianBiobank. | 1        | 0.96        | 0.587           | 0.100(407)          | 0.112(17209)         | -0.0653       | 0.12          |
| HUNT.            | 0        | 1.00        | 0.958           | 0.120(905)          | 0.119(41914)         | 0.00395       | 0.0744        |
| iPSYCH.          | 0        | 0.97        | 0.699           | 0.135(1758)         | 0.133(5937)          | 0.0221        | 0.0571        |
| UKBiobank.       | 0        | 0.99        | 0.732           | 0.135(1454)         | 0.133(58113)         | 0.0602        | 0.176         |
| bmron.           | 0        | 0.95        | 0.659           | 0.146(225)          | 0.154(121)           | -0.103        | 0.134         |
| bmrus.           | 0        | 0.96        | 0.0442          | 0.166(522)          | 0.133(460)           | 0.269         | 0.134         |
| graza.           | 0        | 1.01        | 0.0758          | 0.139(144)          | 0.213(66)            | -0.514        | 0.29          |
| greek.           | 0        | 0.91        | 0.0369          | 0.130(186)          | 0.197(87)            | -0.547        | 0.262         |
| norgs.           | 0        | 1.00        | 0.939           | 0.105(101)          | 0.095(315)           | -0.022        | 0.288         |
| noroe.           | 0        | 0.97        | 0.00616         | 0.161(313)          | 0.113(4367)          | 0.332         | 0.121         |
|                  | <b>1</b> | <b>0.98</b> | <b>2.61e-09</b> | <b>0.137(41917)</b> | <b>0.131(371549)</b> | <b>0.0822</b> | <b>0.0138</b> |

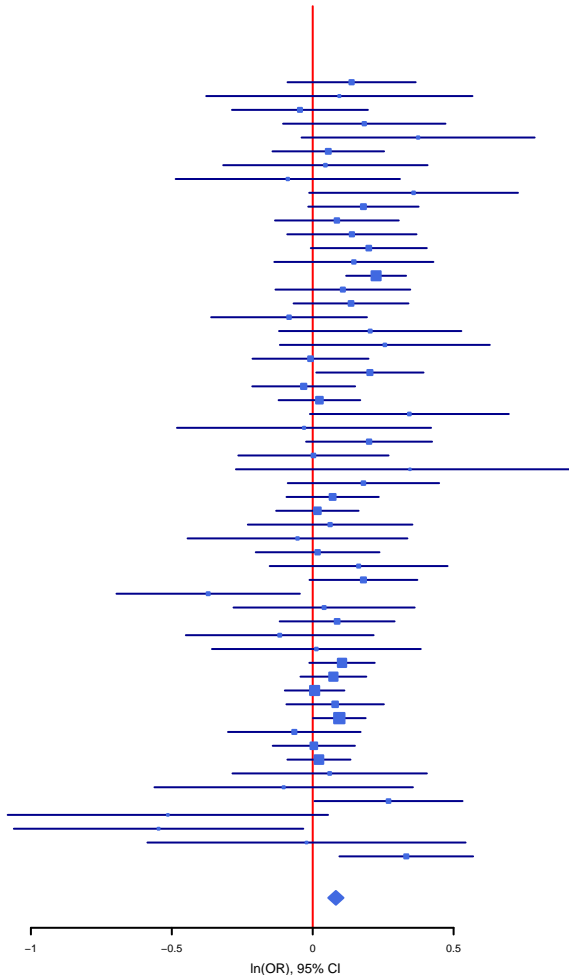

rs62011709

T/A

15:83531774

het\_P:

0.201

het\_I:

13.4

|                  | ngt | info | p_value  | f_ca(n)     | f_co(n)       | ln(OR)   | STDerr |
|------------------|-----|------|----------|-------------|---------------|----------|--------|
| bmau.            | 0   | 1.03 | 0.833    | 0.763(329)  | 0.765(1810)   | -0.0208  | 0.0987 |
| bm2g.            | 0   | 1.07 | 0.234    | 0.818(181)  | 0.766(478)    | 0.223    | 0.187  |
| bm3g.            | 0   | 1.00 | 0.936    | 0.765(489)  | 0.765(880)    | 0.00777  | 0.0965 |
| bmpp.            | 0   | 0.98 | 0.662    | 0.793(410)  | 0.778(689)    | 0.0511   | 0.117  |
| bmpp.            | 0   | 0.97 | 0.293    | 0.786(253)  | 0.756(291)    | 0.172    | 0.164  |
| bonn.            | 0   | 0.96 | 0.544    | 0.763(669)  | 0.751(1246)   | 0.0502   | 0.0828 |
| butr.            | 0   | 0.94 | 0.735    | 0.786(236)  | 0.795(236)    | -0.0559  | 0.165  |
| dub1.            | 1   | 1.03 | 0.0947   | 0.768(1506) | 0.778(796)    | -0.0918  | 0.149  |
| edf1.            | 0   | 1.05 | 0.0105   | 0.759(275)  | 0.828(272)    | -0.399   | 0.156  |
| fat2.            | 0   | 0.99 | 0.195    | 0.785(722)  | 0.755(1027)   | 0.109    | 0.0844 |
| fran.            | 0   | 0.98 | 0.474    | 0.778(451)  | 0.771(1630)   | 0.0661   | 0.0924 |
| gain.            | 0   | 0.96 | 0.313    | 0.776(706)  | 0.758(593)    | 0.0969   | 0.0961 |
| gsk1.            | 0   | 1.00 | 0.182    | 0.780(706)  | 0.761(899)    | 0.114    | 0.0852 |
| hai2.            | 0   | 0.98 | 0.237    | 0.798(410)  | 0.782(479)    | 0.146    | 0.123  |
| icuk.            | 0   | 1.01 | 0.0947   | 0.779(2456) | 0.765(4069)   | 0.0729   | 0.0436 |
| jsi5.            | 0   | 0.99 | 0.828    | 0.773(646)  | 0.770(643)    | 0.0206   | 0.095  |
| may1.            | 0   | 1.02 | 0.786    | 0.764(929)  | 0.763(759)    | -0.0226  | 0.0833 |
| mich.            | 0   | 1.01 | 0.71     | 0.768(481)  | 0.766(399)    | 0.0425   | 0.114  |
| pf1e.            | 0   | 1.00 | 0.624    | 0.758(375)  | 0.767(346)    | -0.0626  | 0.128  |
| rom3.            | 0   | 0.99 | 0.478    | 0.814(233)  | 0.793(198)    | 0.128    | 0.18   |
| si2c.            | 0   | 1.00 | 0.485    | 0.763(628)  | 0.761(1219)   | 0.0594   | 0.085  |
| stp1.            | 0   | 0.98 | 0.148    | 0.785(920)  | 0.765(973)    | 0.116    | 0.0799 |
| swa2.            | 0   | 1.02 | 0.114    | 0.773(865)  | 0.746(2252)   | -0.104   | 0.0652 |
| swei.            | 0   | 0.98 | 0.922    | 0.730(1278) | 0.732(3669)   | -0.00521 | 0.0531 |
| top7.            | 0   | 1.10 | 0.325    | 0.749(416)  | 0.756(350)    | -0.119   | 0.12   |
| top8.            | 0   | 0.98 | 0.935    | 0.740(148)  | 0.746(291)    | -0.0139  | 0.172  |
| ucl2.            | 0   | 1.01 | 0.389    | 0.767(726)  | 0.755(693)    | 0.0762   | 0.0884 |
| ucio.            | 0   | 1.00 | 0.499    | 0.766(427)  | 0.784(488)    | -0.0768  | 0.114  |
| uktr.            | 0   | 1.01 | 0.839    | 0.750(130)  | 0.758(130)    | -0.0412  | 0.203  |
| um64.            | 0   | 1.03 | 0.0339   | 0.757(565)  | 0.717(569)    | 0.201    | 0.0949 |
| usc2.            | 0   | 0.99 | 0.000321 | 0.798(1293) | 0.758(1156)   | 0.258    | 0.0717 |
| wlcc.            | 0   | 1.00 | 0.0929   | 0.787(1644) | 0.768(1641)   | 0.102    | 0.0606 |
| jea2.            | 0   | 1.01 | 0.958    | 0.788(372)  | 0.781(628)    | -0.00602 | 0.115  |
| kfo4.            | 0   | 1.01 | 0.181    | 0.787(247)  | 0.768(288)    | 0.212    | 0.159  |
| tgco2.           | 0   | 1.03 | 0.208    | 0.767(1032) | 0.742(499)    | 0.112    | 0.089  |
| bdrs.            | 0   | 1.05 | 0.187    | 0.784(218)  | 0.758(684)    | 0.175    | 0.133  |
| dutch.           | 0   | 1.00 | 0.0438   | 0.785(831)  | 0.758(953)    | 0.164    | 0.0812 |
| gawil.           | 0   | 1.02 | 0.683    | 0.759(268)  | 0.767(502)    | -0.0065  | 0.126  |
| germ1.           | 0   | 1.01 | 0.0674   | 0.786(219)  | 0.744(992)    | 0.239    | 0.13   |
| gpcw1.           | 0   | 0.97 | 0.109    | 0.790(447)  | 0.768(2092)   | 0.147    | 0.0919 |
| neuc1.           | 0   | 1.03 | 0.00847  | 0.826(215)  | 0.771(750)    | 0.377    | 0.143  |
| spsp3.           | 0   | 0.99 | 0.494    | 0.794(153)  | 0.779(2337)   | 0.101    | 0.147  |
| swed1.           | 0   | 1.00 | 0.432    | 0.745(2909) | 0.741(2844)   | 0.034    | 0.0433 |
| ukwa1.           | 0   | 1.00 | 0.0876   | 0.774(2789) | 0.759(2372)   | 0.0805   | 0.0471 |
| usa4.            | 0   | 1.01 | 0.00227  | 0.801(2956) | 0.779(2930)   | 0.138    | 0.0453 |
| usa5.            | 0   | 0.96 | 0.782    | 0.770(1107) | 0.773(1316)   | 0.0202   | 0.0729 |
| deCODE.          | 0   | 1.00 | 0.854    | 0.737(1972) | 0.737(192602) | 0.00702  | 0.0381 |
| EstonianBiobank. | 1   | 0.99 | 0.0882   | 0.771(407)  | 0.749(17209)  | 0.146    | 0.0856 |
| HUNT.            | 0   | 1.00 | 0.916    | 0.749(905)  | 0.752(41914)  | -0.00587 | 0.0556 |
| iPSYCH.          | 0   | 0.98 | 0.0819   | 0.752(1758) | 0.738(5937)   | 0.0779   | 0.0447 |
| UKBiobank.       | 0   | 1.00 | 0.642    | 0.770(1454) | 0.765(58113)  | 0.0813   | 0.175  |
| bmron.           | 0   | 0.98 | 0.298    | 0.827(251)  | 0.790(121)    | 0.219    | 0.07   |
| bmrus.           | 0   | 0.96 | 0.851    | 0.799(522)  | 0.795(460)    | 0.0219   | 0.116  |
| graza.           | 0   | 0.99 | 0.854    | 0.778(144)  | 0.780(66)     | -0.0478  | 0.26   |
| greek.           | 0   | 0.99 | 0.0223   | 0.829(186)  | 0.749(87)     | 0.532    | 0.233  |
| norgs.           | 0   | 1.03 | 0.792    | 0.788(101)  | 0.792(315)    | 0.055    | 0.209  |
| noroe.           | 0   | 0.98 | 0.46     | 0.775(313)  | 0.748(4367)   | 0.0756   | 0.102  |

1 1.00 1.43e-08 0.771(41917) 0.747(371549) 0.0622 0.011

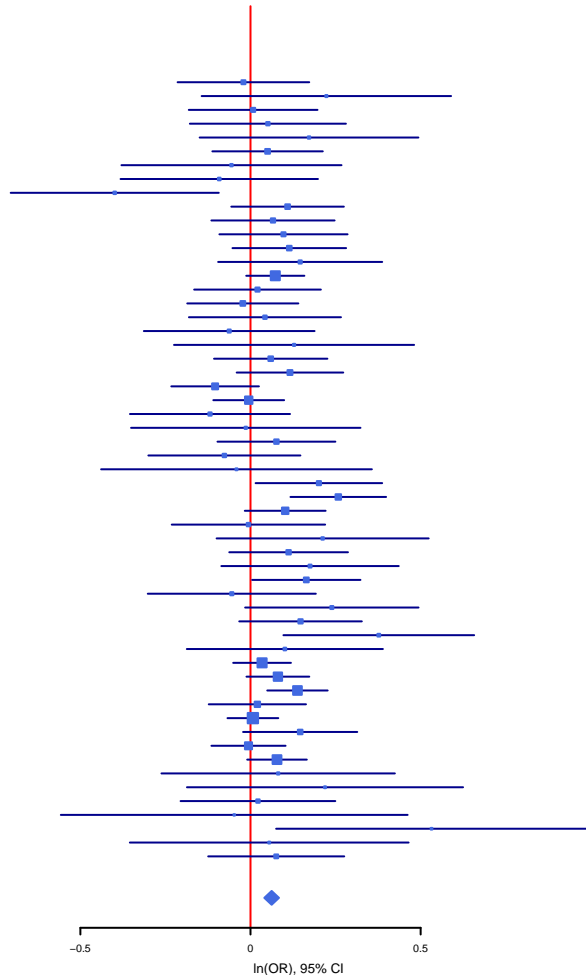

rs748455

T/C

15:85149575

het\_P:

0.439

het\_I:

1.7

|                  | ngt | info | p_value  | f_ca(n)     | f_co(n)       | ln(OR)   | STDerr |
|------------------|-----|------|----------|-------------|---------------|----------|--------|
| bmau.            | 0   | 0.98 | 0.597    | 0.729(329)  | 0.716(1810)   | 0.051    | 0.0965 |
| bm2.             | 0   | 0.99 | 0.478    | 0.705(181)  | 0.672(478)    | 0.123    | 0.173  |
| bm3.             | 0   | 0.97 | 0.588    | 0.702(489)  | 0.682(880)    | 0.0491   | 0.0904 |
| bmpo.            | 0   | 0.98 | 0.354    | 0.702(410)  | 0.724(689)    | -0.0988  | 0.107  |
| bmsp.            | 0   | 1.00 | 0.306    | 0.717(253)  | 0.666(291)    | 0.152    | 0.148  |
| bonn.            | 0   | 0.99 | 0.154    | 0.721(669)  | 0.698(1246)   | 0.11     | 0.0774 |
| butr.            | 0   | 1.04 | 0.1      | 0.669(236)  | 0.616(236)    | 0.22     | 0.134  |
| dub1.            | 0   | 0.99 | 0.726    | 0.717(150)  | 0.729(796)    | -0.0445  | 0.143  |
| edf1.            | 0   | 0.98 | 0.246    | 0.716(275)  | 0.690(272)    | 0.162    | 0.14   |
| fat2.            | 0   | 0.98 | 0.417    | 0.708(722)  | 0.701(1027)   | 0.0634   | 0.0782 |
| fran.            | 0   | 1.00 | 0.545    | 0.682(451)  | 0.678(1630)   | 0.0496   | 0.082  |
| gain.            | 0   | 1.01 | 0.213    | 0.727(706)  | 0.708(593)    | 0.109    | 0.0876 |
| gsk1.            | 0   | 1.01 | 0.846    | 0.692(706)  | 0.695(899)    | -0.0149  | 0.0771 |
| hal2.            | 0   | 1.00 | 0.21     | 0.708(410)  | 0.685(479)    | 0.135    | 0.108  |
| icuk.            | 0   | 1.03 | 0.0145   | 0.726(2456) | 0.705(4069)   | 0.0953   | 0.0402 |
| jsf5.            | 0   | 0.97 | 0.477    | 0.708(646)  | 0.692(643)    | 0.0626   | 0.098  |
| may1.            | 0   | 0.99 | 0.201    | 0.693(929)  | 0.674(759)    | 0.0986   | 0.0772 |
| mich.            | 0   | 0.97 | 0.049    | 0.721(481)  | 0.673(399)    | 0.212    | 0.108  |
| pf1e.            | 0   | 1.04 | 0.276    | 0.714(375)  | 0.686(346)    | 0.127    | 0.116  |
| rom3.            | 0   | 0.98 | 0.0226   | 0.691(233)  | 0.615(198)    | 0.349    | 0.153  |
| st2c.            | 0   | 0.99 | 0.243    | 0.718(628)  | 0.689(1219)   | 0.0944   | 0.0809 |
| stp1.            | 0   | 0.98 | 0.799    | 0.712(920)  | 0.707(973)    | -0.0188  | 0.0737 |
| swa2.            | 0   | 0.97 | 0.326    | 0.712(865)  | 0.706(2252)   | 0.0417   | 0.0658 |
| swei.            | 0   | 1.01 | 0.87     | 0.711(1278) | 0.710(3669)   | 0.00836  | 0.0511 |
| top7.            | 0   | 0.97 | 0.13     | 0.742(416)  | 0.695(350)    | 0.188    | 0.124  |
| top8.            | 0   | 1.04 | 0.821    | 0.708(148)  | 0.699(291)    | 0.0359   | 0.159  |
| ucl2.            | 0   | 1.00 | 0.111    | 0.705(726)  | 0.676(693)    | 0.131    | 0.0822 |
| uclo.            | 0   | 0.99 | 0.522    | 0.724(427)  | 0.713(488)    | 0.0684   | 0.107  |
| uktr.            | 0   | 1.00 | 0.0388   | 0.759(130)  | 0.677(130)    | 0.41     | 0.199  |
| umr4.            | 0   | 1.06 | 0.937    | 0.688(565)  | 0.686(569)    | -0.00702 | 0.0894 |
| usc2.            | 0   | 1.00 | 0.868    | 0.708(1293) | 0.710(1156)   | -0.0109  | 0.0648 |
| wlcc.            | 0   | 0.97 | 0.0516   | 0.722(1644) | 0.698(1641)   | 0.11     | 0.0565 |
| jea2.            | 0   | 0.99 | 0.348    | 0.750(372)  | 0.735(628)    | 0.102    | 0.108  |
| kfo4.            | 0   | 1.00 | 0.766    | 0.672(247)  | 0.671(288)    | 0.0415   | 0.14   |
| tgco2.           | 0   | 1.00 | 0.942    | 0.711(1032) | 0.708(499)    | 0.00628  | 0.0861 |
| bdrs.            | 0   | 0.97 | 0.294    | 0.715(218)  | 0.693(684)    | 0.131    | 0.124  |
| dutch.           | 0   | 1.00 | 0.452    | 0.694(831)  | 0.681(953)    | 0.0551   | 0.0732 |
| gawil.           | 0   | 1.04 | 0.175    | 0.690(258)  | 0.693(502)    | -0.0365  | 0.115  |
| germ1.           | 0   | 0.98 | 0.581    | 0.701(219)  | 0.692(992)    | 0.0664   | 0.12   |
| gpcw1.           | 0   | 1.00 | 0.895    | 0.703(447)  | 0.702(2092)   | -0.0108  | 0.0815 |
| neuc1.           | 0   | 0.96 | 0.838    | 0.689(215)  | 0.699(750)    | -0.0252  | 0.123  |
| spsp3.           | 0   | 1.02 | 0.671    | 0.664(153)  | 0.673(2337)   | -0.0532  | 0.125  |
| swed1.           | 0   | 1.00 | 0.737    | 0.714(2909) | 0.708(2844)   | 0.014    | 0.0418 |
| ukwa1.           | 0   | 0.99 | 0.000374 | 0.729(2789) | 0.694(2372)   | 0.158    | 0.0444 |
| usa4.            | 0   | 1.01 | 0.161    | 0.709(2956) | 0.687(2930)   | 0.0098   | 0.0403 |
| usaw5.           | 0   | 0.99 | 0.131    | 0.710(1107) | 0.684(1316)   | 0.0993   | 0.0658 |
| deCODE.          | 0   | 1.00 | 0.0769   | 0.730(1972) | 0.730(192602) | 0.0672   | 0.038  |
| EstonianBiobank. | 1   | 0.99 | 0.504    | 0.758(407)  | 0.745(17209)  | 0.0559   | 0.0837 |
| HUNT.            | 0   | 0.99 | 0.617    | 0.717(905)  | 0.711(41914)  | 0.0265   | 0.0529 |
| iPSYCH.          | 0   | 1.01 | 0.684    | 0.701(1758) | 0.697(5937)   | 0.0171   | 0.0418 |
| UKBiobank.       | 0   | 1.00 | 4.37e-05 | 0.739(1454) | 0.702(58113)  | 0.853    | 0.209  |
| bmron.           | 0   | 0.95 | 0.022    | 0.689(212)  | 0.682(121)    | 0.117    | 0.183  |
| bmrus.           | 0   | 0.97 | 0.143    | 0.745(522)  | 0.718(460)    | 0.154    | 0.105  |
| graza.           | 0   | 1.03 | 0.0469   | 0.693(144)  | 0.780(66)     | -0.503   | 0.253  |
| greek.           | 0   | 1.01 | 0.812    | 0.620(186)  | 0.614(87)     | 0.0452   | 0.19   |
| norgs.           | 0   | 0.98 | 0.37     | 0.710(101)  | 0.715(315)    | 0.177    | 0.197  |
| noroe.           | 0   | 0.99 | 0.333    | 0.734(313)  | 0.717(4367)   | 0.0939   | 0.0968 |

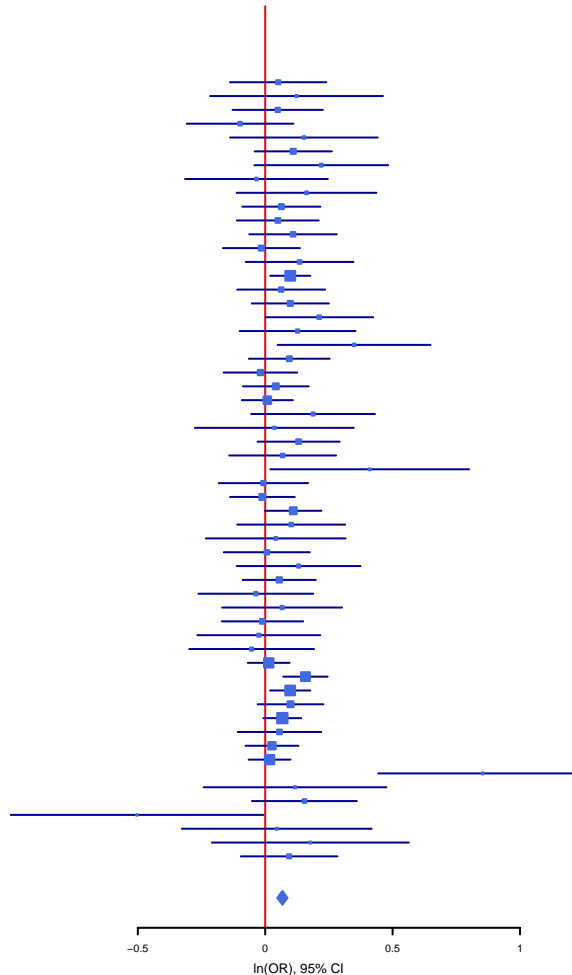

1 1.00 5.01e-11 0.714(41917) 0.719(371549) 0.0675 0.0103

rs4702

G/A

15:91426560

het\_P:

0.0404

het\_I:

26.3

|                  | ngt       | info        | p_value         | f_ca(n)             | f_co(n)              | ln(OR)        | STDerr        |
|------------------|-----------|-------------|-----------------|---------------------|----------------------|---------------|---------------|
| bmau.            | 1         | 1.02        | 0.0288          | 0.499(329)          | 0.451(1810)          | 0.185         | 0.0846        |
| bmj2.            | 1         | 1.01        | 0.535           | 0.461(181)          | 0.431(478)           | 0.0951        | 0.153         |
| bmj3.            | 1         | 1.01        | 0.855           | 0.440(489)          | 0.450(880)           | -0.0149       | 0.0819        |
| bmjpc.           | 1         | 1.00        | 0.412(410)      | 0.418(889)          | 0.418(889)           | -0.0286       | 0.0968        |
| bmsp.            | 1         | 1.00        | 0.877           | 0.467(253)          | 0.459(291)           | 0.0212        | 0.136         |
| bonn.            | 1         | 1.01        | 0.277           | 0.440(669)          | 0.421(1246)          | 0.0759        | 0.0698        |
| butr.            | 1         | 0.99        | 0.948           | 0.479(236)          | 0.477(236)           | 0.00856       | 0.131         |
| dub1.            | 0         | 0.92        | 0.646           | 0.448(150)          | 0.467(796)           | -0.0614       | 0.134         |
| edrl.            | 0         | 0.64        | 0.0259          | 0.469(275)          | 0.413(272)           | 0.358         | 0.161         |
| fal2.            | 0         | 0.90        | 0.445           | 0.463(722)          | 0.451(1027)          | 0.0568        | 0.0743        |
| fram.            | 1         | 1.01        | 0.956           | 0.450(451)          | 0.450(1630)          | -0.00431      | 0.0764        |
| gain.            | 0         | 0.89        | 0.411           | 0.451(706)          | 0.465(593)           | -0.0696       | 0.0946        |
| gsk1.            | 1         | 0.96        | 0.0996          | 0.439(706)          | 0.467(899)           | -0.121        | 0.0732        |
| hal2.            | 0         | 0.90        | 0.94            | 0.465(410)          | 0.475(479)           | -0.00783      | 0.105         |
| icuk.            | 0         | 0.91        | 0.00258         | 0.465(2456)         | 0.441(4069)          | 0.116         | 0.0386        |
| jst5.            | 1         | 1.04        | 0.197           | 0.431(646)          | 0.456(643)           | -0.101        | 0.0787        |
| may1.            | 1         | 1.02        | 0.369           | 0.451(929)          | 0.437(759)           | 0.064         | 0.0712        |
| rich.            | 1         | 0.98        | 0.159           | 0.481(481)          | 0.441(399)           | 0.138         | 0.0982        |
| pf1e.            | 0         | 0.94        | 0.498           | 0.470(375)          | 0.458(346)           | 0.0763        | 0.113         |
| rom3.            | 1         | 1.01        | 0.524           | 0.468(233)          | 0.455(198)           | 0.091         | 0.143         |
| st2c.            | 0         | 0.55        | 0.00114         | 0.486(628)          | 0.448(1219)          | 0.317         | 0.0975        |
| swa2.            | 0         | 0.93        | 0.367           | 0.452(885)          | 0.446(2252)          | 0.0551        | 0.0611        |
| swei.            | 1         | 0.98        | 0.0134          | 0.469(1278)         | 0.439(3669)          | 0.117         | 0.0473        |
| top7.            | 0         | 0.92        | 0.812           | 0.452(416)          | 0.452(350)           | 0.0269        | 0.114         |
| top8.            | 1         | 0.93        | 0.555           | 0.466(148)          | 0.446(291)           | 0.09          | 0.152         |
| uc12.            | 0         | 0.87        | 0.16            | 0.426(726)          | 0.452(693)           | -0.115        | 0.0815        |
| uc1c.            | 0         | 0.67        | 0.629           | 0.449(427)          | 0.442(488)           | 0.0564        | 0.117         |
| ukr.             | 1         | 1.13        | 0.186           | 0.485(130)          | 0.423(130)           | 0.22          | 0.167         |
| ume4.            | 1         | 1.04        | 0.568           | 0.412(565)          | 0.423(569)           | -0.0487       | 0.0851        |
| usc2.            | 1         | 0.96        | 0.148           | 0.460(1293)         | 0.438(1156)          | 0.087         | 0.0601        |
| wfcc.            | 0         | 0.66        | 0.428           | 0.461(1644)         | 0.451(1641)          | 0.0496        | 0.0626        |
| jea2.            | 1         | 1.02        | 0.057           | 0.421(372)          | 0.378(628)           | 0.181         | 0.0952        |
| kfo4.            | 1         | 0.97        | 0.116           | 0.480(247)          | 0.430(288)           | 0.213         | 0.135         |
| tgco2.           | 0         | 0.89        | 0.468           | 0.458(1032)         | 0.444(499)           | 0.0603        | 0.0832        |
| bctrs.           | 1         | 0.98        | 0.461           | 0.468(218)          | 0.444(684)           | 0.0834        | 0.113         |
| dutch.           | 1         | 0.99        | 0.845           | 0.445(831)          | 0.442(953)           | 0.0134        | 0.0686        |
| gawli.           | 1         | 1.03        | 0.000485        | 0.493(268)          | 0.395(502)           | 0.382         | 0.11          |
| germ1.           | 1         | 1.00        | 0.618           | 0.449(219)          | 0.436(992)           | 0.0542        | 0.109         |
| gpcw1.           | 1         | 1.01        | 0.52            | 0.464(447)          | 0.455(2092)          | 0.0476        | 0.074         |
| neuc1.           | 1         | 1.01        | 0.445           | 0.470(215)          | 0.445(750)           | 0.0853        | 0.112         |
| spsn3.           | 0         | 0.98        | 0.467           | 0.428(153)          | 0.429(2337)          | -0.0878       | 0.121         |
| swed1.           | 1         | 1.00        | 0.345           | 0.461(2909)         | 0.447(2844)          | 0.0359        | 0.0381        |
| ukwa1.           | 1         | 1.01        | 0.000478        | 0.468(2789)         | 0.433(2372)          | 0.14          | 0.04          |
| usaw4.           | 1         | 0.99        | 0.968           | 0.464(2956)         | 0.464(2930)          | -0.0015       | 0.0372        |
| usaw5.           | 1         | 0.99        | 0.0444          | 0.474(1107)         | 0.450(1316)          | 0.122         | 0.0605        |
| deCODE.          | 0         | 1.00        | 0.191           | 0.454(1972)         | 0.454(192602)        | 0.044         | 0.0336        |
| EstonianBiobank. | 1         | 0.89        | 0.444           | 0.406(407)          | 0.398(17209)         | 0.0587        | 0.0768        |
| HUNT.            | 0         | 0.96        | 0.532           | 0.449(905)          | 0.442(41914)         | 0.0309        | 0.0494        |
| iPSYCH.          | 0         | 0.90        | 0.621           | 0.441(1758)         | 0.456(5937)          | 0.0202        | 0.0408        |
| UKBiobank.       | 0         | 1.00        | 0.00855         | 0.467(1454)         | 0.442(58113)         | 0.45          | 0.171         |
| bmrom.           | 1         | 1.08        | 0.438           | 0.484(225)          | 0.451(121)           | 0.123         | 0.159         |
| bmrus.           | 1         | 1.01        | 0.508           | 0.405(522)          | 0.414(460)           | -0.062        | 0.0935        |
| graza.           | 1         | 0.90        | 0.108           | 0.486(144)          | 0.402(66)            | 0.37          | 0.23          |
| greek.           | 1         | 1.04        | 0.517           | 0.473(186)          | 0.500(87)            | -0.119        | 0.183         |
| norgs.           | 1         | 1.10        | 0.363           | 0.459(101)          | 0.424(315)           | 0.148         | 0.164         |
| noroe.           | 1         | 0.97        | 0.228           | 0.468(313)          | 0.441(4367)          | 0.105         | 0.0867        |
|                  | <b>38</b> | <b>0.95</b> | <b>3.52e-09</b> | <b>0.457(41917)</b> | <b>0.446(371549)</b> | <b>0.0573</b> | <b>0.0097</b> |

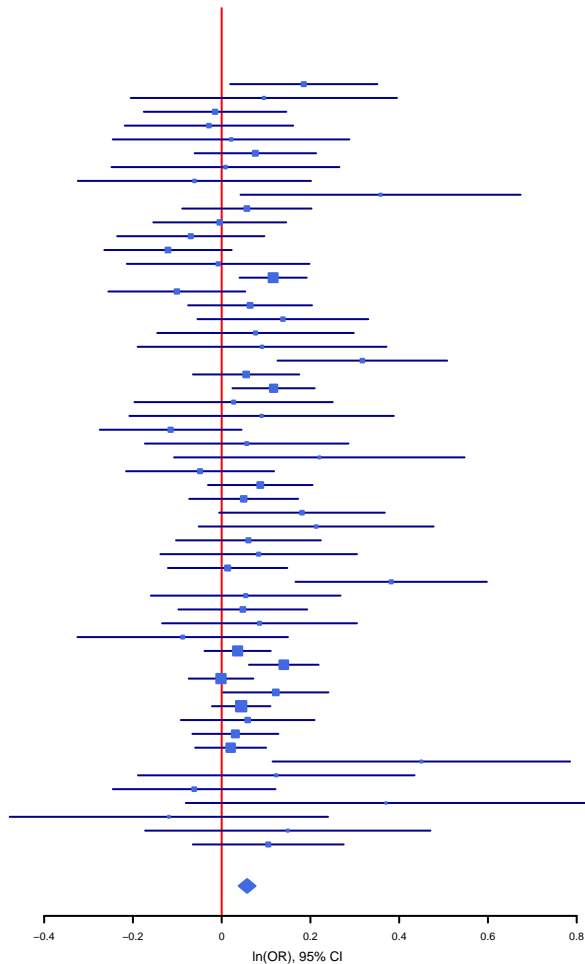

rs28455634

G/A

16:9230816

het\_P: 0.337

het\_I: 6.5

|                  | ngt      | info        | p_value         | f_ca(n)             | f_co(n)              | ln(OR)        | STDerr        |
|------------------|----------|-------------|-----------------|---------------------|----------------------|---------------|---------------|
| bmau.            | 0        | 0.91        | 0.142           | 0.648(329)          | 0.615(1810)          | 0.138         | 0.0937        |
| bm2g.            | 0        | 0.94        | 0.334           | 0.631(1811)         | 0.624(478)           | 0.163         | 0.168         |
| bm3.             | 0        | 0.94        | 0.0244          | 0.664(489)          | 0.615(880)           | 0.2           | 0.0888        |
| bmpo.            | 0        | 0.89        | 0.358           | 0.640(410)          | 0.628(689)           | 0.0967        | 0.105         |
| bmsp.            | 0        | 0.88        | 0.617           | 0.651(253)          | 0.651(291)           | 0.0759        | 0.152         |
| bonn.            | 0        | 0.94        | 0.0808          | 0.608(669)          | 0.635(1246)          | -0.129        | 0.0741        |
| butr.            | 0        | 0.88        | 0.387           | 0.622(236)          | 0.648(236)           | -0.125        | 0.144         |
| dub1.            | 0        | 0.92        | 0.404           | 0.613(150)          | 0.638(796)           | 0.1113        | 0.057         |
| edf1.            | 0        | 0.91        | 0.6             | 0.645(275)          | 0.631(272)           | 0.0743        | 0.142         |
| fat2.            | 0        | 0.86        | 0.232           | 0.634(722)          | 0.616(1027)          | 0.0935        | 0.0782        |
| fran.            | 0        | 0.90        | 0.712           | 0.619(451)          | 0.625(1630)          | -0.0306       | 0.0828        |
| gain.            | 0        | 0.93        | 0.754           | 0.619(706)          | 0.614(593)           | 0.0265        | 0.0846        |
| gsk1.            | 0        | 0.96        | 0.0742          | 0.642(706)          | 0.611(899)           | 0.135         | 0.0756        |
| hai2.            | 0        | 0.92        | 0.863           | 0.630(410)          | 0.632(479)           | -0.0184       | 0.107         |
| icuk.            | 0        | 0.96        | 0.0916          | 0.633(2456)         | 0.619(4069)          | 0.0651        | 0.0386        |
| jsf5.            | 0        | 0.93        | 0.519           | 0.624(646)          | 0.615(643)           | 0.0353        | 0.0522        |
| may1.            | 0        | 0.89        | 0.123           | 0.618(929)          | 0.642(759)           | -0.121        | 0.0782        |
| mich.            | 0        | 0.92        | 0.491           | 0.644(481)          | 0.627(399)           | 0.0723        | 0.105         |
| pf1e.            | 0        | 0.96        | 0.786           | 0.633(375)          | 0.629(346)           | 0.0314        | 0.116         |
| rom3.            | 0        | 0.95        | 0.403           | 0.600(233)          | 0.572(198)           | 0.124         | 0.148         |
| st2c.            | 0        | 0.87        | 0.752           | 0.602(628)          | 0.606(1219)          | -0.0252       | 0.0799        |
| stp1.            | 0        | 0.87        | 0.152           | 0.608(920)          | 0.630(973)           | -0.104        | 0.0727        |
| swa2.            | 0        | 0.91        | 0.91            | 0.594(865)          | 0.590(2282)          | 0.00689       | 0.0525        |
| swei.            | 0        | 0.96        | 0.0348          | 0.613(1278)         | 0.592(3669)          | 0.104         | 0.0491        |
| top7.            | 0        | 0.84        | 0.774           | 0.628(416)          | 0.622(350)           | 0.0351        | 0.122         |
| top8.            | 0        | 0.93        | 0.0845          | 0.646(148)          | 0.585(291)           | 0.275         | 0.16          |
| ucl2.            | 0        | 0.91        | 0.0587          | 0.649(726)          | 0.618(693)           | 0.156         | 0.0824        |
| ucio.            | 0        | 0.86        | 0.133           | 0.643(427)          | 0.612(488)           | 0.16          | 0.107         |
| uktr.            | 0        | 1.03        | 0.0932          | 0.710(130)          | 0.599(130)           | 0.487         | 0.187         |
| umr4.            | 0        | 0.96        | 0.018           | 0.652(565)          | 0.607(569)           | 0.213         | 0.0901        |
| usc2.            | 0        | 0.94        | 0.396           | 0.616(1293)         | 0.606(1156)          | 0.0528        | 0.0622        |
| wlcc.            | 0        | 0.90        | 0.024           | 0.633(1644)         | 0.609(1641)          | 0.124         | 0.0549        |
| jea2.            | 0        | 0.92        | 0.185           | 0.632(372)          | 0.602(628)           | 0.134         | 0.101         |
| kfo4.            | 0        | 0.89        | 0.505           | 0.634(247)          | 0.611(288)           | 0.0951        | 0.143         |
| tgco2.           | 0        | 0.95        | 0.926           | 0.620(1032)         | 0.621(499)           | -0.00763      | 0.0825        |
| bdtrs.           | 0        | 0.88        | 0.789           | 0.634(218)          | 0.635(684)           | 0.0332        | 0.124         |
| dutch.           | 0        | 0.96        | 0.00222         | 0.672(831)          | 0.624(953)           | 0.224         | 0.0733        |
| gawil.           | 0        | 0.88        | 0.405           | 0.622(2268)         | 0.623(2502)          | 0.0946        | 0.119         |
| germ1.           | 0        | 0.95        | 0.567           | 0.602(219)          | 0.625(992)           | -0.0652       | 0.114         |
| gpcw1.           | 0        | 0.92        | 0.0348          | 0.663(447)          | 0.627(2092)          | 0.173         | 0.0818        |
| neuc1.           | 0        | 0.87        | 0.0176          | 0.665(215)          | 0.603(750)           | 0.301         | 0.127         |
| spsp3.           | 0        | 0.89        | 0.122           | 0.648(153)          | 0.612(2337)          | 0.204         | 0.132         |
| swed1.           | 0        | 0.94        | 0.178           | 0.613(2909)         | 0.600(2844)          | 0.0537        | 0.0399        |
| ukwa1.           | 0        | 0.95        | 0.372           | 0.627(2789)         | 0.622(2372)          | 0.0378        | 0.0424        |
| usa4.            | 0        | 0.93        | 0.93            | 0.613(2956)         | 0.606(2930)          | 0.0315        | 0.0332        |
| usaw5.           | 0        | 0.92        | 0.412           | 0.615(1107)         | 0.601(1316)          | 0.0524        | 0.064         |
| deCODE.          | 0        | 1.00        | 0.0405          | 0.620(1972)         | 0.620(192602)        | 0.0715        | 0.0349        |
| EstonianBiobank. | 1        | 0.94        | 0.861           | 0.606(407)          | 0.600(17209)         | 0.0131        | 0.0751        |
| HUNT.            | 0        | 0.96        | 0.112           | 0.657(905)          | 0.638(41914)         | 0.0808        | 0.0509        |
| iPSYCH.          | 0        | 0.92        | 0.198           | 0.635(1758)         | 0.624(5937)          | 0.0535        | 0.0416        |
| UKBiobank.       | 0        | 1.00        | 0.561           | 0.622(1454)         | 0.619(58113)         | 0.103         | 0.178         |
| bmrom.           | 0        | 0.93        | 0.803           | 0.630(2251)         | 0.643(121)           | -0.0469       | 0.167         |
| bmrus.           | 0        | 0.90        | 0.911           | 0.611(522)          | 0.612(460)           | 0.0111        | 0.0999        |
| graza.           | 0        | 0.92        | 0.847           | 0.587(144)          | 0.595(66)            | -0.0442       | 0.229         |
| greek.           | 0        | 1.03        | 0.249           | 0.605(186)          | 0.557(87)            | 0.214         | 0.185         |
| norgs.           | 0        | 0.93        | 0.321           | 0.607(101)          | 0.579(315)           | 0.181         | 0.182         |
| noroe.           | 0        | 0.98        | 0.745           | 0.611(313)          | 0.613(4367)          | 0.0291        | 0.0895        |
|                  | <b>1</b> | <b>0.94</b> | <b>2.63e-10</b> | <b>0.626(41917)</b> | <b>0.620(371549)</b> | <b>0.0628</b> | <b>0.0099</b> |

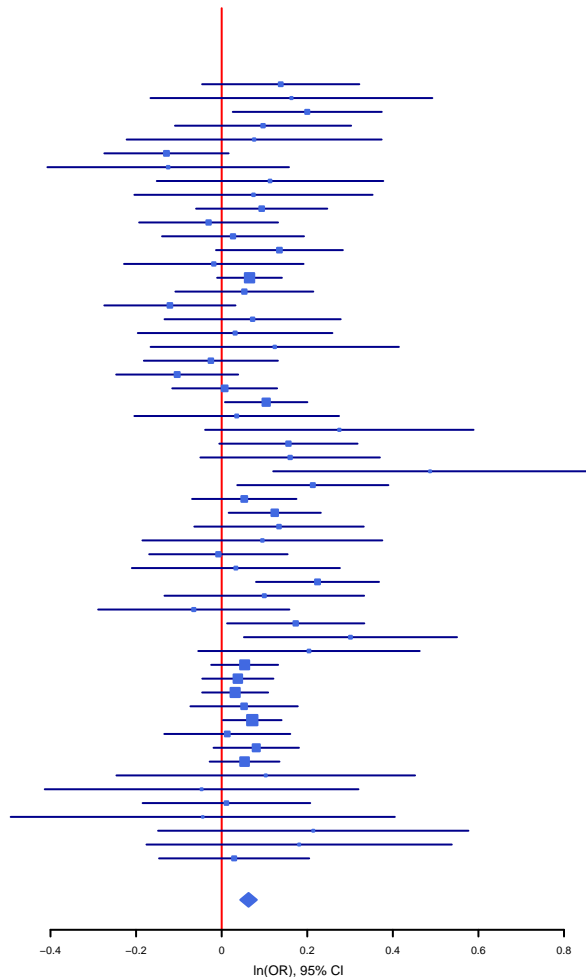

rs7199910

T/G

16:9926348

het\_P:

0.744

het\_I:

0.0

|                  | ngt      | info        | p_value         | f_ca(n)             | f_co(n)              | ln(OR)         | STDerr        |
|------------------|----------|-------------|-----------------|---------------------|----------------------|----------------|---------------|
| bmau.            | 0        | 0.98        | 0.999           | 0.650(329)          | 0.650(1810)          | -0.0002        | 0.0905        |
| bmq2.            | 0        | 1.01        | 0.183           | 0.641(1811)         | 0.663(478)           | -0.216         | 0.162         |
| bmq3.            | 0        | 0.99        | 0.46            | 0.643(489)          | 0.661(880)           | -0.0639        | 0.0865        |
| bmpo.            | 0        | 0.97        | 0.559           | 0.652(410)          | 0.675(689)           | -0.0594        | 0.102         |
| bmsp.            | 0        | 1.02        | 0.415           | 0.560(253)          | 0.590(291)           | -0.112         | 0.137         |
| bonn.            | 0        | 0.96        | 0.33            | 0.644(669)          | 0.662(1246)          | -0.0724        | 0.0742        |
| butr.            | 0        | 1.02        | 0.915           | 0.647(236)          | 0.644(236)           | 0.0143         | 0.135         |
| dubr1.           | 0        | 0.95        | 0.677           | 0.619(796)          | 0.619(796)           | 0.0207         | 0.134         |
| edf1.            | 0        | 0.97        | 0.254           | 0.631(275)          | 0.666(272)           | -0.154         | 0.135         |
| fat2.            | 0        | 1.02        | 0.968           | 0.654(722)          | 0.656(1027)          | 0.0029         | 0.0731        |
| fran.            | 0        | 0.98        | 0.414           | 0.612(451)          | 0.627(1630)          | -0.065         | 0.0796        |
| gain.            | 0        | 0.97        | 0.0381          | 0.621(706)          | 0.662(593)           | -0.175         | 0.0846        |
| gsk1.            | 0        | 0.96        | 0.515           | 0.641(706)          | 0.650(899)           | -0.0495        | 0.0762        |
| hai2.            | 0        | 1.00        | 0.87            | 0.640(410)          | 0.648(479)           | 0.0168         | 0.103         |
| icuk.            | 0        | 1.03        | 0.0656          | 0.648(2456)         | 0.665(4069)          | -0.0639        | 0.038         |
| jsf5.            | 0        | 0.96        | 0.0879          | 0.638(246)          | 0.670(643)           | -0.146         | 0.056         |
| may1.            | 0        | 0.98        | 0.971           | 0.650(929)          | 0.653(759)           | 0.0028         | 0.0755        |
| mich.            | 0        | 0.97        | 0.609           | 0.649(481)          | 0.641(399)           | 0.0525         | 0.103         |
| pf1e.            | 0        | 0.96        | 0.196           | 0.614(375)          | 0.647(346)           | -0.149         | 0.115         |
| rom3.            | 0        | 0.95        | 0.435           | 0.631(233)          | 0.660(198)           | -0.122         | 0.156         |
| st2c.            | 0        | 0.96        | 0.117           | 0.639(628)          | 0.656(1219)          | -0.122         | 0.0778        |
| stp1.            | 0        | 0.94        | 0.816           | 0.641(920)          | 0.649(973)           | -0.0167        | 0.0717        |
| swa2.            | 0        | 0.95        | 0.365           | 0.663(965)          | 0.670(2252)          | -0.0681        | 0.0638        |
| swei.            | 0        | 1.00        | 0.0211          | 0.644(1278)         | 0.672(3669)          | -0.114         | 0.0493        |
| top7.            | 0        | 0.90        | 0.103           | 0.658(416)          | 0.692(350)           | -0.201         | 0.123         |
| top8.            | 0        | 1.00        | 0.972           | 0.655(148)          | 0.665(291)           | 0.00539        | 0.155         |
| ucl2.            | 0        | 0.96        | 0.283           | 0.644(726)          | 0.659(693)           | -0.0871        | 0.0811        |
| uclo.            | 0        | 0.96        | 0.902           | 0.653(427)          | 0.649(488)           | 0.0127         | 0.103         |
| uktr.            | 0        | 0.98        | 0.404           | 0.639(130)          | 0.659(130)           | 0.158          | 0.19          |
| umr4.            | 0        | 1.05        | 0.00772         | 0.679(565)          | 0.650(569)           | -0.229         | 0.0859        |
| usc2.            | 0        | 0.97        | 0.461           | 0.653(1293)         | 0.653(1156)          | 0.0464         | 0.0628        |
| wlcc.            | 0        | 0.93        | 0.512           | 0.645(1644)         | 0.661(1641)          | -0.036         | 0.0549        |
| jea2.            | 0        | 1.02        | 0.57            | 0.656(372)          | 0.668(628)           | -0.0563        | 0.099         |
| kfo4.            | 0        | 1.03        | 0.959           | 0.683(247)          | 0.675(288)           | -0.00702       | 0.138         |
| tgco2.           | 0        | 1.02        | 0.0304          | 0.642(1032)         | 0.681(499)           | -0.179         | 0.0826        |
| bdrs.            | 0        | 0.97        | 0.707           | 0.649(218)          | 0.662(684)           | -0.0452        | 0.12          |
| dutch.           | 0        | 0.99        | 0.55            | 0.659(831)          | 0.651(953)           | 0.0431         | 0.072         |
| gawii.           | 0        | 1.00        | 0.921           | 0.648(268)          | 0.681(262)           | -0.177         | 0.115         |
| germ1.           | 0        | 1.01        | 0.131           | 0.641(219)          | 0.676(992)           | -0.17          | 0.113         |
| gpcw1.           | 0        | 0.96        | 0.159           | 0.621(447)          | 0.644(2092)          | -0.11          | 0.0783        |
| neuc1.           | 0        | 1.03        | 0.362           | 0.623(215)          | 0.650(750)           | -0.103         | 0.114         |
| spsp3.           | 0        | 0.99        | 0.157           | 0.554(153)          | 0.587(2337)          | -0.172         | 0.122         |
| swed1.           | 0        | 0.99        | 0.667           | 0.670(2909)         | 0.667(2844)          | 0.0173         | 0.0404        |
| ukwa1.           | 0        | 1.01        | 0.325           | 0.652(2789)         | 0.663(2372)          | -0.0412        | 0.0419        |
| usa4.            | 0        | 1.01        | 0.241           | 0.628(2966)         | 0.648(2930)          | -0.0866        | 0.0324        |
| usa5.            | 0        | 1.01        | 0.266           | 0.630(1107)         | 0.645(1316)          | -0.0691        | 0.0622        |
| deCODE.          | 0        | 1.00        | 0.893           | 0.712(1972)         | 0.712(192602)        | -0.00499       | 0.0369        |
| EstonianBiobank. | 1        | 1.00        | 0.139           | 0.659(407)          | 0.683(17209)         | -0.112         | 0.0755        |
| HUNT.            | 0        | 0.98        | 0.207           | 0.680(905)          | 0.666(41914)         | 0.0644         | 0.0511        |
| iPSYCH.          | 0        | 1.00        | 0.0387          | 0.668(1758)         | 0.687(5937)          | -0.0848        | 0.041         |
| UKBiobank.       | 0        | 1.00        | 0.958           | 0.659(1454)         | 0.660(58113)         | -0.00919       | 0.173         |
| bmron.           | 0        | 1.04        | 0.494           | 0.625(2121)         | 0.637(2121)          | 0.1115         | 0.09          |
| bmrus.           | 0        | 0.99        | 0.647           | 0.670(522)          | 0.678(460)           | -0.0451        | 0.0984        |
| graza.           | 0        | 1.03        | 0.318           | 0.657(144)          | 0.703(66)            | -0.228         | 0.228         |
| greek.           | 0        | 1.06        | 0.143           | 0.675(186)          | 0.732(87)            | -0.295         | 0.201         |
| norgs.           | 0        | 1.06        | 0.383           | 0.618(101)          | 0.624(315)           | -0.15          | 0.172         |
| noroe.           | 0        | 0.97        | 0.766           | 0.652(313)          | 0.658(4367)          | -0.027         | 0.0905        |
|                  | <b>1</b> | <b>0.99</b> | <b>1.66e-08</b> | <b>0.650(41917)</b> | <b>0.688(371549)</b> | <b>-0.0557</b> | <b>0.0099</b> |

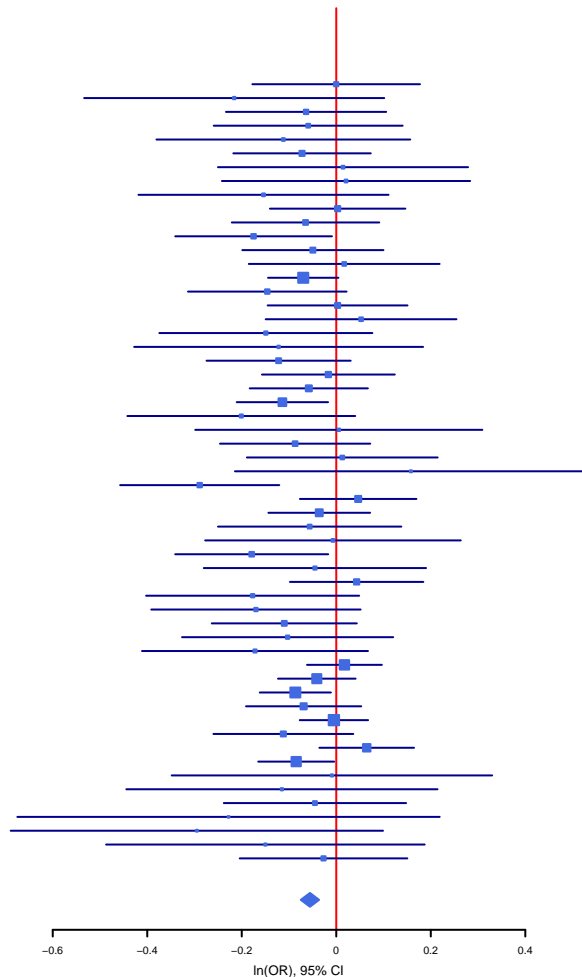

rs12932628

G/T

16:89632725

het\_P:

0.275

het\_I:

9.6

|            | ngt | info | p_value  | f_ca(n)     | f_co(n)       | ln(OR)   | STDerr |
|------------|-----|------|----------|-------------|---------------|----------|--------|
| bmaw.      | 0   | 0.82 | 0.359    | 0.544(329)  | 0.527(1810)   | 0.0867   | 0.0946 |
| bmj2.      | 1   | 1.02 | 0.0753   | 0.502(181)  | 0.547(478)    | -0.28    | 0.157  |
| bmj3.      | 0   | 0.81 | 0.0291   | 0.507(489)  | 0.545(880)    | -0.2     | 0.0918 |
| bmj9.      | 1   | 0.79 | 0.0786   | 0.447(451)  | 0.532(889)    | -0.17    | 0.108  |
| bmsp.      | 0   | 0.80 | 0.385    | 0.401(253)  | 0.410(291)    | -0.134   | 0.155  |
| bonn.      | 0   | 0.82 | 0.21     | 0.499(669)  | 0.526(1246)   | -0.097   | 0.0773 |
| butr.      | 1   | 1.01 | 0.3      | 0.468(236)  | 0.502(236)    | -0.135   | 0.13   |
| dub1.      | 0   | 0.87 | 0.127    | 0.499(150)  | 0.537(796)    | -0.207   | 0.136  |
| edi1.      | 0   | 0.91 | 0.539    | 0.527(275)  | 0.536(272)    | -0.0827  | 0.135  |
| fal2.      | 0   | 0.85 | 0.0129   | 0.493(722)  | 0.534(1027)   | -0.189   | 0.076  |
| fran.      | 0   | 0.77 | 0.786    | 0.447(451)  | 0.462(1630)   | -0.0239  | 0.0878 |
| gain.      | 0   | 0.85 | 0.78     | 0.512(706)  | 0.510(593)    | 0.0241   | 0.0863 |
| gsk1.      | 0   | 0.86 | 0.00361  | 0.511(706)  | 0.557(899)    | -0.226   | 0.0777 |
| hal2.      | 1   | 1.02 | 0.21     | 0.492(410)  | 0.524(479)    | -0.123   | 0.098  |
| icuk.      | 0   | 0.94 | 0.686    | 0.516(2456) | 0.524(4069)   | -0.0152  | 0.0378 |
| jst5.      | 1   | 1.04 | 0.748    | 0.540(646)  | 0.537(643)    | 0.025    | 0.0779 |
| may1.      | 1   | 0.94 | 0.995    | 0.516(929)  | 0.521(759)    | -0.0005  | 0.0735 |
| nich.      | 0   | 0.88 | 0.165    | 0.497(481)  | 0.527(399)    | -0.143   | 0.103  |
| pf1.       | 1   | 1.00 | 0.123    | 0.527(346)  | 0.562(346)    | -0.169   | 0.11   |
| rom3.      | 1   | 1.00 | 0.237    | 0.457(233)  | 0.513(198)    | -0.17    | 0.144  |
| st2c.      | 0   | 0.73 | 0.754    | 0.519(628)  | 0.503(1219)   | 0.0265   | 0.085  |
| stp1.      | 0   | 0.81 | 0.788    | 0.511(920)  | 0.513(973)    | -0.0197  | 0.0734 |
| swa2.      | 0   | 0.76 | 0.124    | 0.581(885)  | 0.603(2252)   | -0.105   | 0.0681 |
| swei.      | 1   | 1.01 | 0.967    | 0.574(1278) | 0.574(3669)   | -0.002   | 0.0473 |
| top7.      | 0   | 0.94 | 0.798    | 0.559(416)  | 0.570(350)    | -0.0291  | 0.114  |
| top8.      | 1   | 0.98 | 0.405    | 0.584(148)  | 0.557(291)    | 0.124    | 0.149  |
| uc12.      | 1   | 0.97 | 0.359    | 0.554(726)  | 0.537(693)    | 0.0706   | 0.0771 |
| uclo.      | 0   | 0.87 | 0.121    | 0.513(427)  | 0.548(488)    | -0.159   | 0.102  |
| ukr.       | 1   | 1.09 | 0.867    | 0.519(130)  | 0.511(130)    | 0.0282   | 0.168  |
| ume4.      | 1   | 1.05 | 0.293    | 0.583(565)  | 0.560(569)    | 0.0881   | 0.0837 |
| usc2.      | 1   | 0.98 | 0.114    | 0.512(1293) | 0.536(1156)   | -0.0941  | 0.0596 |
| wtcc.      | 0   | 0.81 | 0.156    | 0.515(1644) | 0.535(1641)   | -0.0801  | 0.0564 |
| jea2.      | 0   | 0.83 | 0.211    | 0.564(372)  | 0.580(628)    | -0.132   | 0.105  |
| kfo4.      | 1   | 1.01 | 0.529    | 0.489(247)  | 0.502(288)    | -0.0825  | 0.131  |
| tcg2.      | 0   | 0.91 | 0.559    | 0.517(1032) | 0.537(499)    | -0.0484  | 0.0826 |
| bdtrs.     | 1   | 1.02 | 0.825    | 0.541(218)  | 0.551(684)    | -0.0245  | 0.111  |
| dutch.     | 1   | 0.95 | 0.692    | 0.544(831)  | 0.539(953)    | 0.0277   | 0.07   |
| gawil.     | 1   | 0.98 | 0.379    | 0.522(268)  | 0.547(502)    | -0.0968  | 0.11   |
| germ1.     | 1   | 1.00 | 0.452    | 0.504(219)  | 0.527(992)    | -0.0813  | 0.108  |
| gpcw1.     | 1   | 1.00 | 0.985    | 0.516(447)  | 0.511(2092)   | -0.0014  | 0.0745 |
| neuc1.     | 1   | 0.94 | 0.819    | 0.541(215)  | 0.543(750)    | 0.0573   | 0.15   |
| psp3.      | 1   | 0.95 | 0.727    | 0.392(153)  | 0.389(237)    | 0.0436   | 0.125  |
| swed1.     | 1   | 0.99 | 0.0437   | 0.569(2909) | 0.585(2844)   | -0.0777  | 0.0385 |
| ukwa1.     | 1   | 1.00 | 0.168    | 0.527(2789) | 0.542(2372)   | -0.0552  | 0.04   |
| usaw4.     | 1   | 1.00 | 0.32     | 0.498(2956) | 0.506(2930)   | -0.0369  | 0.0371 |
| usaw5.     | 1   | 0.96 | 0.928    | 0.506(1107) | 0.509(1316)   | -0.00562 | 0.0614 |
| deCODE.    | 0   | 0.95 | 0.0366   | 0.488(1972) | 0.488(192602) | -0.0736  | 0.0352 |
| HUNT.      | 0   | 0.93 | 0.374    | 0.560(905)  | 0.571(41914)  | -0.0446  | 0.0502 |
| iPSYCH.    | 0   | 0.77 | 0.000186 | 0.523(1758) | 0.554(5937)   | -0.165   | 0.0441 |
| UKBiobank. | 0   | 0.99 | 0.815    | 0.525(1454) | 0.528(58113)  | -0.0403  | 0.172  |
| bmrom.     | 1   | 1.04 | 0.0037   | 0.444(225)  | 0.545(121)    | -0.488   | 0.168  |
| bmrus.     | 1   | 0.97 | 0.233    | 0.547(522)  | 0.573(460)    | -0.112   | 0.0938 |
| graza.     | 1   | 1.05 | 0.19     | 0.541(144)  | 0.469(66)     | 0.274    | 0.209  |
| greek.     | 1   | 0.98 | 0.581    | 0.473(186)  | 0.444(87)     | 0.105    | 0.189  |
| norgs.     | 0   | 0.99 | 0.206    | 0.618(101)  | 0.551(315)    | 0.225    | 0.178  |
| noroe.     | 1   | 0.96 | 0.908    | 0.576(313)  | 0.570(4367)   | -0.0102  | 0.088  |

30 0.93 6.71e-09 0.523(41917) 0.513(371549) -0.057 0.0098

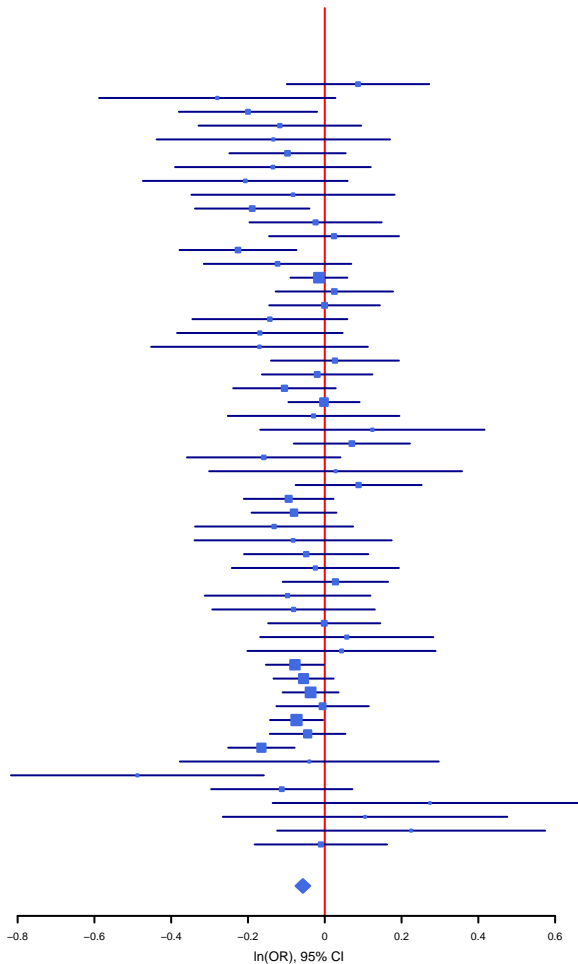

rs4790841

C/T

17:1835482  
het\_P:

0.778

het\_I:

0.0

|                  | ngt         | info            | p_value             | f_ca(n)              | f_co(n)        | ln(OR)        | STDerr |
|------------------|-------------|-----------------|---------------------|----------------------|----------------|---------------|--------|
| bmau.            | 0           | 0.96            | 0.69                | 0.828(329)           | 0.834(1810)    | -0.046        | 0.115  |
| bm2.             | 0           | 0.95            | 0.0758              | 0.817(181)           | 0.865(478)     | -0.399        | 0.225  |
| bm3.             | 0           | 0.95            | 0.492               | 0.827(489)           | 0.843(880)     | -0.077        | 0.112  |
| bm4.             | 0           | 0.90            | 0.154               | 0.820(410)           | 0.813(689)     | -0.189        | 0.133  |
| bm5.             | 0           | 0.99            | 0.248               | 0.851(253)           | 0.870(291)     | -0.227        | 0.196  |
| born.            | 0           | 0.97            | 0.509               | 0.833(669)           | 0.845(1246)    | -0.0633       | 0.0958 |
| butr.            | 0           | 0.99            | 0.655               | 0.868(236)           | 0.858(236)     | 0.0853        | 0.191  |
| dub1.            | 0           | 0.71            | 0.336               | 0.830(150)           | 0.848(796)     | -0.195        | 0.202  |
| edi1.            | 0           | 0.64            | 0.195               | 0.846(275)           | 0.872(272)     | -0.299        | 0.231  |
| fat2.            | 0           | 0.60            | 0.106               | 0.829(722)           | 0.846(1027)    | -0.197        | 0.122  |
| fran.            | 0           | 0.85            | 0.15                | 0.820(451)           | 0.834(1630)    | -0.155        | 0.108  |
| gain.            | 0           | 0.82            | 0.694               | 0.843(706)           | 0.837(593)     | 0.0468        | 0.119  |
| gsk1.            | 0           | 0.99            | 0.515               | 0.842(706)           | 0.852(899)     | -0.0649       | 0.0995 |
| hal2.            | 0           | 0.99            | 0.0544              | 0.815(410)           | 0.849(479)     | -0.258        | 0.134  |
| icuk.            | 0           | 0.96            | 0.0878              | 0.834(2456)          | 0.845(4069)    | -0.0864       | 0.0507 |
| jst5.            | 0           | 1.00            | 0.929               | 0.844(646)           | 0.840(643)     | 0.00975       | 0.109  |
| may1.            | 0           | 0.98            | 0.0391              | 0.819(929)           | 0.841(759)     | -0.199        | 0.0966 |
| mich.            | 0           | 1.07            | 0.226               | 0.822(481)           | 0.845(399)     | -0.154        | 0.127  |
| pf1.             | 0           | 0.93            | 0.149               | 0.834(375)           | 0.857(348)     | -0.226        | 0.157  |
| rom3.            | 0           | 0.93            | 0.61                | 0.855(233)           | 0.845(198)     | 0.107         | 0.21   |
| st2c.            | 0           | 0.59            | 0.304               | 0.843(628)           | 0.853(1219)    | -0.135        | 0.131  |
| swa2.            | 0           | 0.74            | 0.771               | 0.819(885)           | 0.829(2252)    | -0.0259       | 0.0889 |
| swei.            | 0           | 0.97            | 0.0798              | 0.816(1278)          | 0.833(3669)    | -0.108        | 0.0619 |
| top7.            | 0           | 0.74            | 0.311               | 0.826(416)           | 0.850(350)     | -0.175        | 0.173  |
| top8.            | 0           | 0.97            | 0.686               | 0.834(148)           | 0.835(291)     | -0.081        | 0.2    |
| uc1.             | 0           | 1.03            | 0.586               | 0.827(726)           | 0.834(693)     | -0.0544       | 0.0996 |
| uc1o.            | 0           | 0.68            | 0.598               | 0.844(427)           | 0.851(488)     | -0.0848       | 0.161  |
| uktr.            | 0           | 1.02            | 0.36                | 0.805(130)           | 0.836(130)     | -0.209        | 0.228  |
| ume4.            | 0           | 0.96            | 0.889               | 0.827(565)           | 0.831(569)     | -0.0159       | 0.115  |
| usc2.            | 0           | 0.97            | 0.2                 | 0.841(1293)          | 0.854(1156)    | -0.106        | 0.0828 |
| wtc.             | 0           | 0.68            | 0.312               | 0.840(1644)          | 0.846(1641)    | -0.0849       | 0.0841 |
| jea2.            | 0           | 0.94            | 0.454               | 0.836(372)           | 0.850(628)     | -0.1          | 0.134  |
| kfo4.            | 0           | 0.92            | 0.358               | 0.853(247)           | 0.872(288)     | -0.184        | 0.2    |
| tgo2.            | 0           | 0.71            | 0.785               | 0.844(1032)          | 0.843(999)     | 0.0346        | 0.127  |
| bdrs.            | 0           | 0.96            | 0.334               | 0.851(218)           | 0.838(684)     | 0.154         | 0.159  |
| dutch.           | 0           | 0.95            | 0.0629              | 0.824(831)           | 0.847(953)     | -0.175        | 0.0941 |
| gawli.           | 0           | 0.99            | 0.011               | 0.812(268)           | 0.863(502)     | -0.373        | 0.147  |
| germ1.           | 0           | 0.98            | 0.163               | 0.858(219)           | 0.831(992)     | 0.22          | 0.157  |
| gpcw1.           | 0           | 0.99            | 0.406               | 0.844(447)           | 0.834(2092)    | 0.0848        | 0.102  |
| neuct1.          | 0           | 1.01            | 0.478               | 0.825(215)           | 0.837(750)     | -0.104        | 0.146  |
| sps3.            | 0           | 0.96            | 0.58                | 0.864(153)           | 0.871(2337)    | -0.0829       | 0.176  |
| swed1.           | 0           | 1.00            | 0.331               | 0.824(2909)          | 0.833(2844)    | -0.0487       | 0.0501 |
| ukwa1.           | 0           | 0.98            | 0.387               | 0.836(2789)          | 0.843(2372)    | -0.0473       | 0.0547 |
| usaw4.           | 0           | 0.99            | 0.0135              | 0.833(2956)          | 0.850(2930)    | -0.126        | 0.051  |
| usaw5.           | 0           | 1.00            | 0.873               | 0.847(1107)          | 0.850(1316)    | 0.0134        | 0.0839 |
| deCODE.          | 0           | 1.00            | 0.434               | 0.853(1972)          | 0.853(192602)  | -0.0363       | 0.0464 |
| EstonianBiobank. | 1           | 0.98            | 0.271               | 0.826(407)           | 0.838(17209)   | -0.104        | 0.0946 |
| HUNT.            | 0           | 0.95            | 0.927               | 0.853(905)           | 0.851(4914)    | 0.00626       | 0.0681 |
| iPSYCH.          | 0           | 0.96            | 0.0893              | 0.821(1758)          | 0.832(5937)    | -0.0849       | 0.0515 |
| UKBiobank.       | 0           | 1.00            | 0.017               | 0.829(1454)          | 0.844(58113)   | -0.361        | 0.151  |
| bmrom.           | 0           | 1.01            | 0.403               | 0.862(225)           | 0.846(121)     | 0.193         | 0.231  |
| bmrus.           | 0           | 0.96            | 0.525               | 0.844(522)           | 0.851(460)     | -0.0831       | 0.131  |
| graza.           | 0           | 1.03            | 0.78                | 0.830(144)           | 0.841(66)      | -0.0796       | 0.285  |
| greek.           | 0           | 0.97            | 0.666               | 0.866(186)           | 0.880(87)      | -0.124        | 0.287  |
| noigs.           | 0           | 0.96            | 0.144               | 0.889(101)           | 0.838(315)     | 0.397         | 0.272  |
| noroe.           | 0           | 0.99            | 0.597               | 0.833(313)           | 0.837(4367)    | -0.0608       | 0.115  |
| <b>1</b>         | <b>0.94</b> | <b>3.14e-08</b> | <b>0.834(41917)</b> | <b>0.849(371549)</b> | <b>-0.0729</b> | <b>0.0132</b> |        |

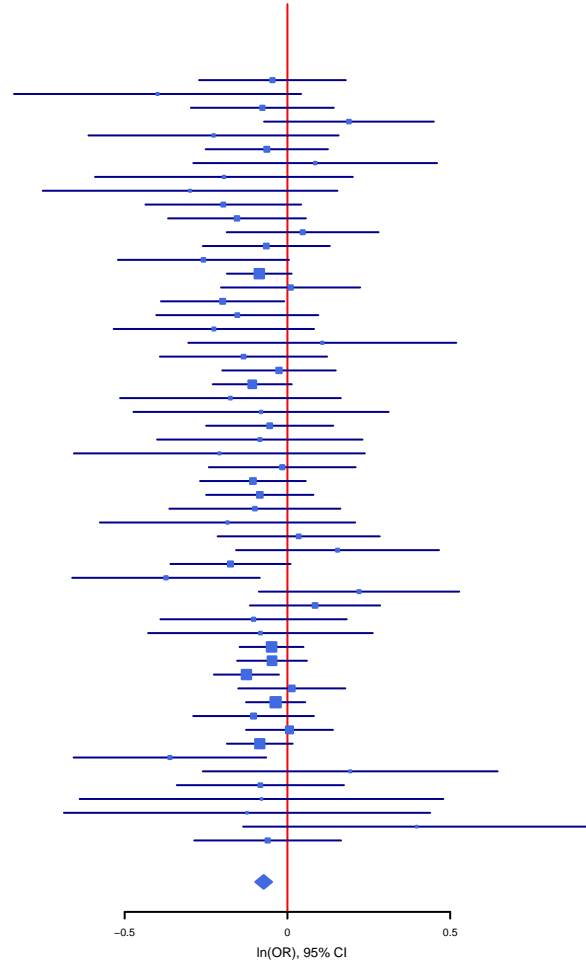



rs11870683

T/A

17:38129841

het\_P:

0.56

het\_I:

0.0

|                  | ngt      | info        | p_value         | f_ca(n)             | f_co(n)              | ln(OR)        | STDerr        |
|------------------|----------|-------------|-----------------|---------------------|----------------------|---------------|---------------|
| bmau.            | 0        | 1.00        | 0.152           | 0.672(329)          | 0.646(1810)          | 0.13          | 0.0905        |
| bmg2.            | 0        | 0.97        | 0.053           | 0.661(181)          | 0.637(478)           | 0.335         | 0.173         |
| bmg3.            | 0        | 1.01        | 0.641           | 0.630(489)          | 0.638(880)           | -0.0393       | 0.0844        |
| bmpc.            | 0        | 0.94        | 0.086           | 0.655(410)          | 0.650(839)           | -0.0414       | 0.102         |
| bmsp.            | 0        | 0.96        | 0.363           | 0.670(253)          | 0.629(291)           | 0.133         | 0.146         |
| bonn.            | 0        | 1.00        | 0.113           | 0.655(669)          | 0.632(1246)          | 0.115         | 0.0729        |
| butr.            | 0        | 0.96        | 0.988           | 0.584(236)          | 0.584(236)           | -0.0021       | 0.135         |
| dub1.            | 0        | 0.94        | 0.117           | 0.691(150)          | 0.644(796)           | 0.22          | 0.141         |
| edi1.            | 0        | 0.87        | 0.602           | 0.653(275)          | 0.638(272)           | 0.0742        | 0.142         |
| fal2.            | 0        | 0.93        | 0.678           | 0.656(722)          | 0.655(1027)          | 0.0318        | 0.0766        |
| fran.            | 0        | 1.02        | 0.719           | 0.655(451)          | 0.653(1630)          | 0.0286        | 0.0793        |
| gain.            | 0        | 0.96        | 0.0814          | 0.681(706)          | 0.649(593)           | 0.149         | 0.0856        |
| gsk1.            | 0        | 1.00        | 0.3             | 0.634(706)          | 0.648(899)           | -0.0774       | 0.0748        |
| hal2.            | 0        | 0.97        | 0.997           | 0.677(410)          | 0.664(479)           | -0.0004       | 0.107         |
| icuk.            | 0        | 0.98        | 0.00428         | 0.669(2456)         | 0.645(4069)          | 0.112         | 0.0391        |
| jst5.            | 0        | 0.98        | 0.341           | 0.635(646)          | 0.651(643)           | -0.0805       | 0.0845        |
| may1.            | 0        | 1.01        | 0.938           | 0.657(929)          | 0.659(759)           | -0.00582      | 0.075         |
| rich.            | 0        | 1.05        | 0.772           | 0.656(481)          | 0.651(399)           | 0.0287        | 0.0993        |
| pf1e.            | 0        | 1.04        | 0.738           | 0.670(375)          | 0.666(346)           | 0.0379        | 0.114         |
| rom3.            | 0        | 1.01        | 0.718           | 0.599(233)          | 0.606(198)           | -0.0525       | 0.145         |
| st2c.            | 0        | 0.87        | 0.296           | 0.642(628)          | 0.632(1219)          | 0.0851        | 0.0814        |
| stp1.            | 0        | 0.87        | 0.0692          | 0.652(920)          | 0.624(973)           | 0.135         | 0.074         |
| swa2.            | 0        | 0.95        | 0.0725          | 0.684(885)          | 0.661(2252)          | 0.116         | 0.0645        |
| swei.            | 0        | 0.99        | 0.00971         | 0.691(1278)         | 0.664(3669)          | 0.131         | 0.0505        |
| top7.            | 0        | 0.95        | 0.694           | 0.641(416)          | 0.667(350)           | -0.0461       | 0.117         |
| top8.            | 0        | 0.99        | 0.357           | 0.644(148)          | 0.671(291)           | -0.144        | 0.156         |
| ucl2.            | 0        | 0.96        | 0.355           | 0.676(726)          | 0.657(693)           | 0.0758        | 0.0819        |
| uclo.            | 0        | 0.88        | 0.73            | 0.653(427)          | 0.644(488)           | 0.0366        | 0.106         |
| ukr.             | 0        | 0.97        | 0.336           | 0.656(130)          | 0.616(130)           | 0.178         | 0.185         |
| ume4.            | 0        | 1.03        | 0.0224          | 0.669(565)          | 0.623(569)           | 0.201         | 0.0881        |
| usc2.            | 0        | 0.98        | 0.747           | 0.645(1293)         | 0.638(1156)          | 0.0199        | 0.0618        |
| wfcc.            | 0        | 0.92        | 0.523           | 0.660(1644)         | 0.653(1641)          | 0.0354        | 0.0554        |
| jea2.            | 0        | 1.03        | 0.125           | 0.653(372)          | 0.627(828)           | 0.15          | 0.098         |
| kfo4.            | 0        | 0.95        | 0.8             | 0.644(247)          | 0.629(288)           | -0.0357       | 0.141         |
| tgco2.           | 0        | 0.97        | 0.201           | 0.675(1032)         | 0.652(499)           | 0.107         | 0.0834        |
| bdtrs.           | 0        | 0.96        | 0.893           | 0.613(218)          | 0.623(684)           | -0.0158       | 0.118         |
| dutch.           | 0        | 1.03        | 0.214           | 0.661(831)          | 0.679(953)           | -0.0884       | 0.0712        |
| gawil.           | 0        | 0.95        | 0.0379          | 0.696(268)          | 0.646(502)           | 0.249         | 0.12          |
| germ1.           | 0        | 1.01        | 0.102           | 0.678(219)          | 0.632(992)           | 0.186         | 0.114         |
| gpcw1.           | 0        | 0.96        | 0.194           | 0.662(447)          | 0.640(2092)          | 0.104         | 0.0796        |
| neuc1.           | 0        | 1.10        | 0.99            | 0.642(216)          | 0.621(750)           | 0.312         | 0.11          |
| spsp3.           | 0        | 0.98        | 0.198           | 0.680(153)          | 0.649(2337)          | 0.167         | 0.13          |
| swed1.           | 0        | 0.96        | 0.778           | 0.664(2909)         | 0.666(2844)          | -0.0116       | 0.0409        |
| ukwa1.           | 0        | 0.96        | 0.0178          | 0.663(2789)         | 0.643(2372)          | 0.101         | 0.0427        |
| usaw4.           | 0        | 0.97        | 0.00962         | 0.641(2956)         | 0.618(2930)          | 0.101         | 0.0391        |
| usaw5.           | 0        | 0.98        | 0.69            | 0.644(1107)         | 0.630(1316)          | 0.0253        | 0.0632        |
| EstonianBiobank. | 1        | 0.98        | 0.83            | 0.656(407)          | 0.658(17209)         | -0.0162       | 0.0755        |
| HUNT.            | 0        | 0.99        | 0.99            | 0.684(905)          | 0.653(41914)         | 0.0403        | 0.0505        |
| iPSYCH.          | 0        | 0.98        | 0.826           | 0.660(1758)         | 0.659(5937)          | 0.00906       | 0.041         |
| UKBiobank.       | 0        | 1.00        | 0.585           | 0.652(1454)         | 0.649(58113)         | 0.0925        | 0.174         |
| bmrom.           | 0        | 1.01        | 0.491           | 0.571(225)          | 0.605(121)           | -0.114        | 0.166         |
| bmrus.           | 0        | 0.99        | 0.276           | 0.616(522)          | 0.596(460)           | 0.103         | 0.0944        |
| graza.           | 0        | 0.94        | 0.199           | 0.650(144)          | 0.587(66)            | 0.29          | 0.226         |
| greek.           | 0        | 0.95        | 0.667           | 0.585(186)          | 0.602(87)            | -0.0838       | 0.195         |
| norgs.           | 0        | 1.09        | 0.615           | 0.660(101)          | 0.636(315)           | 0.0387        | 0.173         |
| noroe.           | 0        | 1.00        | 0.572           | 0.640(313)          | 0.666(4367)          | -0.0505       | 0.0893        |
|                  | <b>1</b> | <b>0.97</b> | <b>2.79e-08</b> | <b>0.657(41917)</b> | <b>0.650(371549)</b> | <b>0.0573</b> | <b>0.0103</b> |

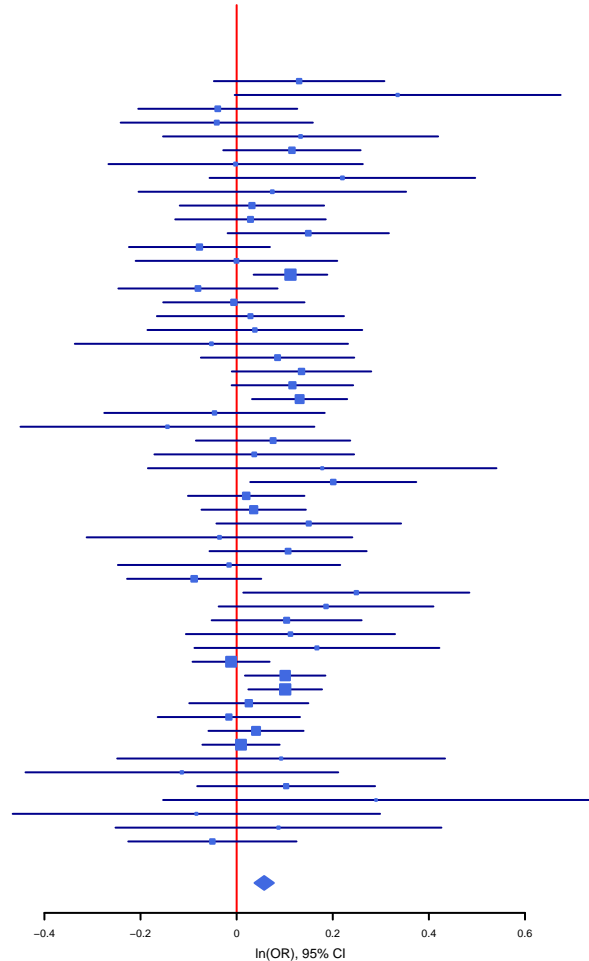

| rs61554907       |          | G/T         | 17:38220432     |                     | 0.277                | het_I:         | 9.5           |
|------------------|----------|-------------|-----------------|---------------------|----------------------|----------------|---------------|
|                  |          |             | het_P:          |                     |                      |                |               |
| ngt              | info     | p_value     | f_ca(n)         | f_co(n)             | ln(OR)               | STDerr         |               |
| bmau.            | 0        | 0.98        | 0.7             | 0.902(329)          | 0.897(1810)          | 0.0554         | 0.144         |
| bmj2.            | 0        | 0.95        | 0.011           | 0.855(181)          | 0.894(478)           | -0.613         | 0.241         |
| bmj3.            | 0        | 0.99        | 0.291           | 0.887(489)          | 0.897(880)           | -0.139         | 0.131         |
| bmj4.            | 1.00     | 0.202       | 0.102           | 0.924(110)          | 0.914(889)           | -0.283         | 0.163         |
| bmsp.            | 0        | 0.81        | 0.701           | 0.894(253)          | 0.886(291)           | 0.0936         | 0.243         |
| bonn.            | 0        | 0.96        | 0.0357          | 0.879(669)          | 0.901(1246)          | -0.237         | 0.113         |
| butr.            | 0        | 0.97        | 0.781           | 0.923(236)          | 0.918(236)           | 0.068          | 0.245         |
| dub1.            | 0        | 0.96        | 0.214           | 0.867(150)          | 0.891(796)           | -0.241         | 0.194         |
| edf1.            | 0        | 0.60        | 0.651           | 0.892(275)          | 0.891(272)           | 0.119          | 0.262         |
| faI2.            | 0        | 0.98        | 0.761           | 0.876(722)          | 0.876(1027)          | -0.0325        | 0.107         |
| fram.            | 0        | 0.93        | 0.25            | 0.875(451)          | 0.885(1630)          | -0.14          | 0.122         |
| gain.            | 0        | 0.98        | 0.326           | 0.894(706)          | 0.905(593)           | -0.131         | 0.134         |
| gsk1.            | 0        | 1.03        | 0.491           | 0.895(706)          | 0.904(899)           | -0.0807        | 0.117         |
| hal2.            | 0        | 0.97        | 0.432           | 0.873(410)          | 0.889(479)           | -0.123         | 0.156         |
| icuk.            | 0        | 0.97        | 0.482           | 0.893(2456)         | 0.896(4069)          | -0.0424        | 0.0603        |
| jst5.            | 0        | 0.97        | 0.906           | 0.895(646)          | 0.894(643)           | -0.0156        | 0.132         |
| may1.            | 0        | 0.98        | 0.617           | 0.878(929)          | 0.880(759)           | -0.0554        | 0.111         |
| rich.            | 0        | 0.97        | 0.306           | 0.890(481)          | 0.906(399)           | -0.167         | 0.164         |
| pf1e.            | 1.05     | 0.773       | 0.894(375)      | 0.890(346)          | -0.0502              | 0.174          |               |
| rom3.            | 0        | 1.06        | 0.452           | 0.932(233)          | 0.919(198)           | 0.198          | 0.263         |
| st2c.            | 0        | 0.62        | 0.288           | 0.905(628)          | 0.894(1219)          | 0.164          | 0.155         |
| swa2.            | 0        | 0.97        | 0.617           | 0.895(885)          | 0.898(2252)          | -0.0485        | 0.0969        |
| swei.            | 0        | 0.97        | 0.0318          | 0.879(1278)         | 0.892(3669)          | -0.158         | 0.0738        |
| top7.            | 0        | 0.92        | 0.496           | 0.865(416)          | 0.875(350)           | -0.115         | 0.168         |
| top8.            | 0        | 0.99        | 0.344           | 0.849(148)          | 0.861(291)           | -0.2           | 0.211         |
| ucI2.            | 0        | 1.04        | 0.0294          | 0.868(726)          | 0.893(693)           | -0.251         | 0.115         |
| ucIc.            | 0        | 0.75        | 0.553           | 0.891(427)          | 0.896(488)           | -0.106         | 0.178         |
| uktr.            | 0        | 0.89        | 0.961           | 0.877(130)          | 0.876(130)           | 0.014          | 0.283         |
| ume4.            | 0        | 0.93        | 0.000846        | 0.877(565)          | 0.920(569)           | -0.496         | 0.149         |
| usc2.            | 0        | 0.99        | 0.811           | 0.895(1293)         | 0.902(1156)          | -0.0233        | 0.0974        |
| wfcc.            | 0        | 0.75        | 0.0948          | 0.892(1644)         | 0.903(1641)          | -0.161         | 0.0965        |
| jea2.            | 0        | 0.97        | 0.662           | 0.911(372)          | 0.906(628)           | 0.073          | 0.167         |
| kfo4.            | 0        | 0.90        | 0.164           | 0.865(247)          | 0.895(288)           | -0.295         | 0.212         |
| tgco2.           | 0        | 0.93        | 0.285           | 0.881(1032)         | 0.893(499)           | -0.138         | 0.129         |
| bdtrs.           | 0        | 0.92        | 0.533           | 0.900(218)          | 0.892(684)           | 0.12           | 0.193         |
| dutch.           | 0        | 0.94        | 0.939           | 0.881(831)          | 0.883(953)           | -0.00823       | 0.108         |
| gawli.           | 0        | 0.86        | 0.003           | 0.863(268)          | 0.907(502)           | -0.547         | 0.184         |
| germ1.           | 0        | 0.91        | 0.99            | 0.894(219)          | 0.890(992)           | 0.0023         | 0.184         |
| gpcw1.           | 0        | 0.98        | 0.394           | 0.883(447)          | 0.893(2092)          | -0.0999        | 0.117         |
| neuc1.           | 0        | 0.95        | 0.509           | 0.905(215)          | 0.892(750)           | 0.128          | 0.194         |
| sps3.            | 0        | 0.98        | 0.181           | 0.861(153)          | 0.885(2337)          | -0.246         | 0.184         |
| swed1.           | 0        | 0.92        | 0.122           | 0.885(2909)         | 0.895(2844)          | -0.0973        | 0.063         |
| ukwa1.           | 0        | 0.93        | 0.0566          | 0.884(2789)         | 0.896(2372)          | -0.126         | 0.0661        |
| usaw4.           | 0        | 0.91        | 0.247           | 0.898(2956)         | 0.904(2930)          | -0.0754        | 0.0652        |
| usaw5.           | 0        | 0.92        | 0.276           | 0.892(1107)         | 0.905(1316)          | -0.113         | 0.104         |
| deCODE.          | 0        | 1.00        | 0.193           | 0.860(1972)         | 0.860(192602)        | -0.062         | 0.0476        |
| EstonianBiobank. | 1        | 0.97        | 0.977           | 0.924(407)          | 0.922(17209)         | 0.00398        | 0.136         |
| HUNT.            | 0        | 0.98        | 0.754           | 0.874(905)          | 0.877(41914)         | -0.0232        | 0.074         |
| iPSYCH.          | 0        | 0.96        | 0.0646          | 0.897(1758)         | 0.886(5937)          | 0.118          | 0.064         |
| UKBiobank.       | 0        | 1.00        | 0.094           | 0.885(1454)         | 0.893(68113)         | -0.262         | 0.157         |
| bmrom.           | 0        | 0.99        | 0.119           | 0.896(225)          | 0.932(121)           | -0.478         | 0.307         |
| bmrus.           | 0        | 0.92        | 0.113           | 0.899(522)          | 0.921(460)           | -0.267         | 0.169         |
| graza.           | 0        | 0.86        | 0.123           | 0.898(144)          | 0.943(66)            | -0.704         | 0.457         |
| greek.           | 0        | 0.79        | 0.874           | 0.913(186)          | 0.920(87)            | -0.0611        | 0.384         |
| norgs.           | 0        | 0.91        | 0.441           | 0.873(101)          | 0.887(315)           | -0.212         | 0.274         |
| noroe.           | 0        | 0.97        | 0.0728          | 0.855(313)          | 0.872(4367)          | -0.222         | 0.124         |
|                  | <b>1</b> | <b>0.94</b> | <b>1.64e-08</b> | <b>0.887(41917)</b> | <b>0.876(371549)</b> | <b>-0.0868</b> | <b>0.0154</b> |

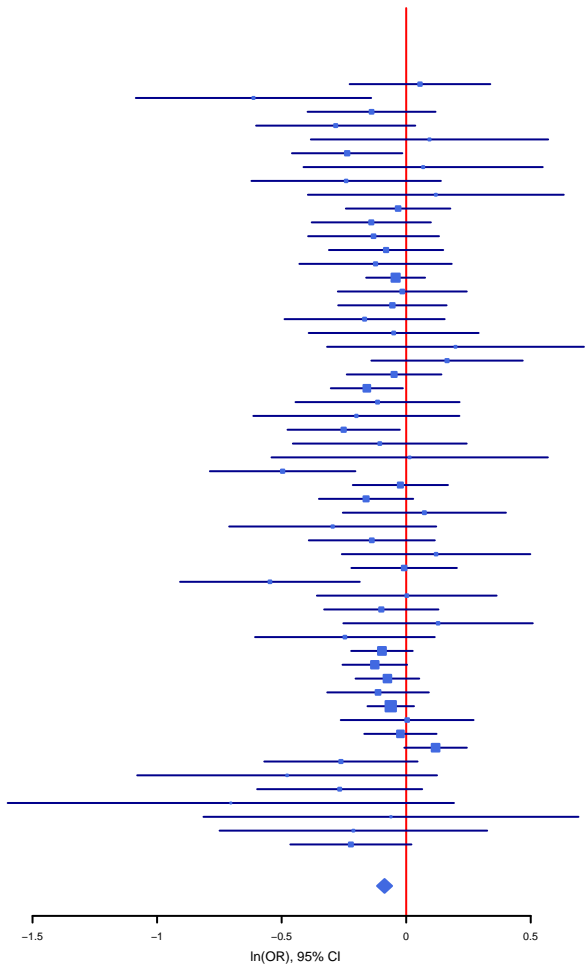

rs228768

G/T

17:42191893

het\_P:

0.233

het\_I:

11.6

|                  | ngt | info | p_value  | f_ca(n)     | f_co(n)       | ln(OR)   | STDerr |
|------------------|-----|------|----------|-------------|---------------|----------|--------|
| bmau.            | 0   | 0.95 | 0.205    | 0.298(329)  | 0.326(1810)   | -0.121   | 0.0955 |
| bm2g.            | 0   | 0.93 | 0.622    | 0.333(181)  | 0.324(478)    | 0.084    | 0.17   |
| bm3.             | 0   | 0.98 | 0.000562 | 0.360(489)  | 0.295(880)    | 0.306    | 0.0888 |
| bmpo.            | 0   | 0.93 | 0.133    | 0.373(410)  | 0.350(689)    | 0.155    | 0.103  |
| bmsp.            | 0   | 1.03 | 0.371    | 0.340(253)  | 0.332(291)    | 0.126    | 0.141  |
| bonn.            | 0   | 0.98 | 0.608    | 0.318(669)  | 0.310(1246)   | 0.0387   | 0.0756 |
| butr.            | 0   | 1.01 | 0.259    | 0.305(236)  | 0.340(236)    | -0.156   | 0.139  |
| dub1.            | 0   | 1.01 | 0.743    | 0.336(150)  | 0.330(796)    | 0.0444   | 0.134  |
| edf1.            | 0   | 0.89 | 0.191    | 0.347(275)  | 0.308(272)    | 0.187    | 0.143  |
| fat2.            | 1   | 0.99 | 0.25     | 0.327(722)  | 0.309(1027)   | 0.0873   | 0.0758 |
| fran.            | 0   | 0.95 | 0.309    | 0.335(451)  | 0.310(1630)   | 0.0847   | 0.0833 |
| gain.            | 1   | 0.93 | 0.86     | 0.321(706)  | 0.316(593)    | 0.0157   | 0.0885 |
| gsk1.            | 0   | 0.98 | 0.000545 | 0.349(706)  | 0.294(899)    | 0.269    | 0.0778 |
| hal2.            | 0   | 0.95 | 0.446    | 0.325(410)  | 0.313(479)    | 0.0835   | 0.11   |
| icuk.            | 0   | 0.97 | 0.0187   | 0.320(2456) | 0.297(4069)   | 0.0947   | 0.0403 |
| js15.            | 0   | 0.99 | 0.131    | 0.328(646)  | 0.299(643)    | 0.132    | 0.087  |
| may1.            | 0   | 0.96 | 0.303    | 0.324(929)  | 0.303(759)    | 0.081    | 0.0787 |
| mich.            | 0   | 0.97 | 0.45     | 0.323(481)  | 0.311(399)    | 0.08     | 0.106  |
| pf1e.            | 0   | 1.02 | 0.452    | 0.334(375)  | 0.350(346)    | -0.0863  | 0.115  |
| rom3.            | 0   | 0.96 | 0.846    | 0.355(233)  | 0.333(198)    | 0.0301   | 0.155  |
| st2c.            | 0   | 0.87 | 0.345    | 0.339(628)  | 0.319(1219)   | 0.079    | 0.0836 |
| stp1.            | 1   | 1.01 | 0.278    | 0.333(920)  | 0.317(973)    | 0.0759   | 0.07   |
| swa2.            | 0   | 1.02 | 0.429    | 0.309(895)  | 0.291(2252)   | 0.0489   | 0.0631 |
| swei.            | 0   | 0.95 | 0.794    | 0.308(1278) | 0.298(9669)   | 0.0136   | 0.0522 |
| top7.            | 1   | 1.00 | 0.232    | 0.294(416)  | 0.337(350)    | -0.14    | 0.117  |
| top8.            | 0   | 1.06 | 0.536    | 0.358(148)  | 0.341(291)    | 0.0929   | 0.15   |
| ucl2.            | 0   | 0.99 | 0.38     | 0.304(726)  | 0.292(693)    | 0.073    | 0.0831 |
| uclo.            | 1   | 0.99 | 0.882    | 0.297(427)  | 0.291(488)    | 0.0155   | 0.104  |
| uktr.            | 0   | 0.94 | 0.334    | 0.324(130)  | 0.286(130)    | 0.191    | 0.197  |
| umr4.            | 0   | 1.01 | 0.552    | 0.295(655)  | 0.288(569)    | 0.0553   | 0.0932 |
| usc2.            | 0   | 1.01 | 0.74     | 0.332(1293) | 0.324(1156)   | 0.0207   | 0.0625 |
| wlcc.            | 1   | 0.99 | 0.679    | 0.315(1644) | 0.306(1641)   | 0.0227   | 0.0548 |
| jea2.            | 0   | 0.99 | 0.799    | 0.373(372)  | 0.376(628)    | 0.025    | 0.098  |
| kfo4.            | 0   | 0.87 | 0.0924   | 0.336(247)  | 0.284(288)    | 0.256    | 0.152  |
| tgco2.           | 1   | 1.03 | 0.844    | 0.326(1032) | 0.331(499)    | -0.0161  | 0.0818 |
| bdrs.            | 0   | 1.03 | 0.0016   | 0.370(218)  | 0.295(684)    | 0.37     | 0.117  |
| dutch.           | 0   | 0.95 | 0.651    | 0.283(831)  | 0.287(953)    | -0.0349  | 0.0772 |
| gawil.           | 0   | 0.94 | 0.621    | 0.311(268)  | 0.310(502)    | 0.0601   | 0.121  |
| germ1.           | 0   | 0.96 | 0.101    | 0.346(219)  | 0.310(992)    | 0.193    | 0.118  |
| gpcw1.           | 0   | 0.98 | 0.304    | 0.346(447)  | 0.325(2092)   | 0.0816   | 0.0793 |
| neuc1.           | 0   | 0.96 | 0.368    | 0.335(215)  | 0.313(750)    | 0.109    | 0.121  |
| spsp3.           | 0   | 0.93 | 0.615    | 0.320(153)  | 0.338(2337)   | -0.0669  | 0.133  |
| swed1.           | 0   | 0.97 | 0.366    | 0.305(2909) | 0.298(2844)   | 0.0378   | 0.0418 |
| ukwa1.           | 0   | 0.97 | 0.0147   | 0.326(2789) | 0.301(2372)   | 0.107    | 0.0439 |
| usa4.            | 0   | 0.98 | 0.00019  | 0.351(268)  | 0.318(2930)   | 0.153    | 0.0398 |
| usa5.            | 0   | 0.95 | 0.534    | 0.320(1107) | 0.337(1316)   | -0.0412  | 0.0663 |
| deCODE.          | 0   | 1.00 | 0.899    | 0.275(1972) | 0.275(192602) | -0.00501 | 0.0394 |
| EstonianBiobank. | 1   | 0.98 | 0.256    | 0.367(407)  | 0.348(17209)  | 0.085    | 0.0747 |
| HUNT.            | 0   | 0.99 | 0.106    | 0.335(905)  | 0.316(41914)  | 0.0837   | 0.0518 |
| iPSYCH.          | 0   | 0.96 | 0.618    | 0.298(1758) | 0.294(5937)   | 0.0215   | 0.043  |
| UKBiobank.       | 0   | 1.00 | 0.837    | 0.307(1454) | 0.306(58113)  | -0.0366  | 0.178  |
| bmron.           | 0   | 0.90 | 0.485    | 0.335(225)  | 0.311(121)    | 0.29     | 0.06   |
| bmrus.           | 0   | 0.92 | 0.101    | 0.389(522)  | 0.353(460)    | 0.163    | 0.0984 |
| graza.           | 0   | 0.94 | 0.0988   | 0.386(144)  | 0.300(66)     | 0.394    | 0.239  |
| greek.           | 0   | 0.86 | 0.992    | 0.308(186)  | 0.310(87)     | 0.0023   | 0.217  |
| norgs.           | 0   | 0.98 | 0.415    | 0.272(101)  | 0.314(315)    | -0.156   | 0.192  |
| noroe.           | 0   | 0.99 | 0.672    | 0.335(313)  | 0.324(4367)   | 0.0385   | 0.091  |

**10 0.98 2.83e-10 0.322(41917) 0.294(371549) 0.0644 0.0102**

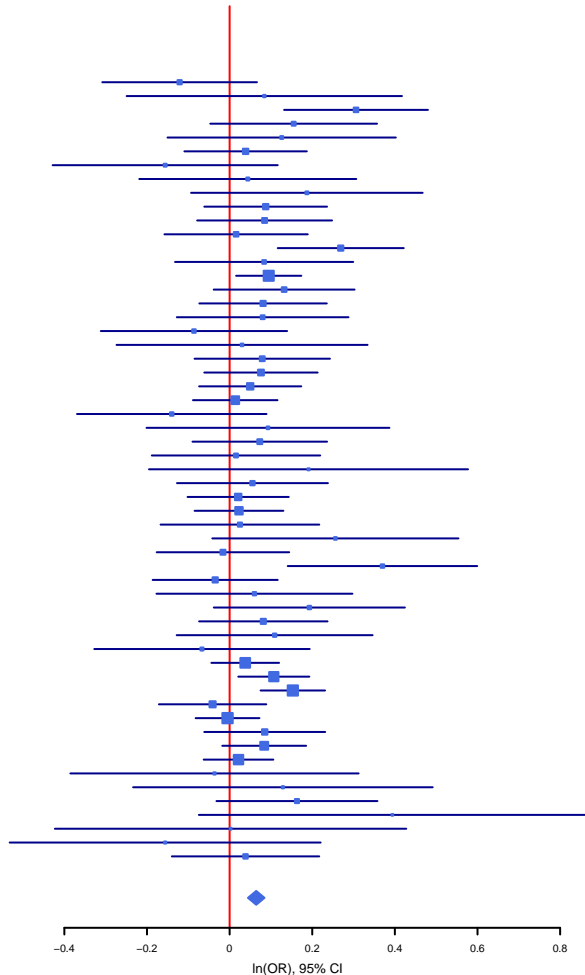

rs6032110

A/G

20:43944323

het\_P:

0.553

het\_I:

0.0

|                  | ngt | info | p_value  | f_ca(n)     | f_co(n)       | ln(OR)   | STDerr |
|------------------|-----|------|----------|-------------|---------------|----------|--------|
| bmau.            | 0   | 0.97 | 0.367    | 0.542(329)  | 0.522(1810)   | 0.0784   | 0.087  |
| bmq2.            | 0   | 1.03 | 0.755    | 0.566(181)  | 0.520(478)    | 0.0504   | 0.161  |
| bmq3.            | 0   | 0.99 | 0.809    | 0.538(489)  | 0.553(880)    | -0.02    | 0.0827 |
| bmpo.            | 0   | 0.95 | 0.534    | 0.540(410)  | 0.552(689)    | -0.0613  | 0.0986 |
| bmsp.            | 0   | 1.07 | 0.232    | 0.534(253)  | 0.505(291)    | 0.159    | 0.133  |
| bonn.            | 0   | 0.99 | 0.529    | 0.551(669)  | 0.543(1246)   | 0.0443   | 0.0703 |
| butr.            | 0   | 1.00 | 0.877    | 0.577(236)  | 0.572(236)    | 0.0203   | 0.132  |
| dub1.            | 0   | 0.92 | 0.619    | 0.536(150)  | 0.506(796)    | 0.023    | 0.134  |
| edf1.            | 0   | 0.93 | 0.306    | 0.521(275)  | 0.502(272)    | 0.134    | 0.131  |
| fat2.            | 0   | 0.99 | 0.394    | 0.548(722)  | 0.531(1027)   | 0.0603   | 0.0708 |
| fran.            | 0   | 0.93 | 0.139    | 0.541(451)  | 0.511(1630)   | 0.117    | 0.0793 |
| gain.            | 0   | 0.96 | 0.151    | 0.546(706)  | 0.514(593)    | 0.117    | 0.0814 |
| gsk1.            | 0   | 0.99 | 0.0804   | 0.547(706)  | 0.517(899)    | 0.126    | 0.072  |
| hai2.            | 0   | 0.92 | 0.192    | 0.549(410)  | 0.518(479)    | 0.135    | 0.103  |
| icuk.            | 0   | 0.99 | 0.496    | 0.535(2456) | 0.529(4069)   | 0.0251   | 0.0369 |
| jsf5.            | 0   | 0.98 | 0.223    | 0.540(646)  | 0.513(643)    | 0.0983   | 0.087  |
| may1.            | 0   | 0.98 | 0.561    | 0.519(929)  | 0.525(759)    | -0.0422  | 0.0725 |
| mich.            | 0   | 0.98 | 0.942    | 0.535(481)  | 0.534(399)    | 0.00707  | 0.0977 |
| pf1e.            | 0   | 1.02 | 0.000456 | 0.596(375)  | 0.503(346)    | 0.385    | 0.11   |
| rom3.            | 0   | 0.94 | 0.808    | 0.548(233)  | 0.552(198)    | -0.0361  | 0.149  |
| st2c.            | 0   | 1.02 | 0.878    | 0.528(628)  | 0.511(1219)   | 0.0111   | 0.0725 |
| stp1.            | 0   | 0.96 | 0.6      | 0.535(920)  | 0.545(973)    | -0.0354  | 0.0676 |
| swa2.            | 0   | 1.01 | 0.665    | 0.539(895)  | 0.538(2252)   | 0.0254   | 0.0587 |
| swei.            | 0   | 0.97 | 0.023    | 0.541(1278) | 0.518(3669)   | 0.108    | 0.0477 |
| top7.            | 0   | 1.01 | 0.993    | 0.502(416)  | 0.509(350)    | -0.0009  | 0.108  |
| top8.            | 0   | 1.02 | 0.358    | 0.541(148)  | 0.511(291)    | 0.134    | 0.145  |
| ucf2.            | 0   | 0.97 | 0.106    | 0.570(726)  | 0.544(693)    | 0.125    | 0.0775 |
| ucio.            | 0   | 1.01 | 0.425    | 0.528(427)  | 0.507(488)    | 0.0759   | 0.0951 |
| uktr.            | 0   | 1.01 | 0.861    | 0.525(130)  | 0.533(130)    | -0.0307  | 0.175  |
| umef4.           | 0   | 0.97 | 0.165    | 0.535(565)  | 0.508(569)    | 0.119    | 0.0858 |
| usc2.            | 0   | 1.00 | 0.197    | 0.542(1293) | 0.526(1193)   | 0.0759   | 0.0589 |
| wlcc.            | 0   | 0.97 | 0.0734   | 0.538(1644) | 0.514(1641)   | 0.0917   | 0.0512 |
| jea2.            | 0   | 0.95 | 0.738    | 0.561(372)  | 0.558(628)    | 0.0325   | 0.0973 |
| kfo4.            | 0   | 0.96 | 0.597    | 0.608(247)  | 0.594(288)    | 0.0719   | 0.136  |
| tgco2.           | 0   | 0.97 | 0.414    | 0.531(1032) | 0.518(499)    | 0.0647   | 0.0791 |
| bdrs.            | 0   | 0.98 | 0.932    | 0.556(218)  | 0.556(684)    | 0.00975  | 0.114  |
| dutch.           | 0   | 0.99 | 0.0384   | 0.550(831)  | 0.512(953)    | 0.142    | 0.0685 |
| gawil.           | 0   | 0.96 | 0.297    | 0.572(268)  | 0.574(262)    | 0.112    | 0.112  |
| germ1.           | 0   | 0.95 | 0.0212   | 0.604(219)  | 0.550(992)    | 0.264    | 0.114  |
| gpcw1.           | 0   | 1.02 | 0.045    | 0.573(447)  | 0.534(2092)   | 0.149    | 0.0743 |
| neuc1.           | 0   | 0.95 | 0.473    | 0.514(215)  | 0.532(750)    | -0.0818  | 0.114  |
| spsp3.           | 0   | 0.92 | 0.289    | 0.544(153)  | 0.513(2337)   | 0.132    | 0.124  |
| swed1.           | 0   | 0.99 | 0.26     | 0.530(2909) | 0.520(2844)   | 0.0429   | 0.038  |
| ukwa1.           | 0   | 0.99 | 0.697    | 0.530(2789) | 0.532(2372)   | -0.0156  | 0.0402 |
| usaw4.           | 0   | 0.98 | 0.0849   | 0.540(2956) | 0.525(2930)   | 0.0645   | 0.074  |
| usaw5.           | 0   | 0.98 | 0.207    | 0.537(1107) | 0.517(1316)   | 0.077    | 0.061  |
| deCODE.          | 0   | 1.00 | 0.0131   | 0.506(1972) | 0.506(192602) | 0.0823   | 0.0332 |
| EstonianBiobank. | 1   | 0.99 | 0.322    | 0.539(407)  | 0.519(17209)  | 0.0713   | 0.072  |
| HUNT.            | 0   | 0.99 | 0.681    | 0.511(905)  | 0.506(41914)  | 0.0199   | 0.0483 |
| iPSYCH.          | 0   | 0.98 | 0.908    | 0.517(1758) | 0.518(5937)   | -0.00451 | 0.0388 |
| UKBiobank.       | 0   | 1.00 | 0.00739  | 0.549(1454) | 0.522(58113)  | 0.475    | 0.177  |
| bmron.           | 0   | 1.03 | 0.51     | 0.544(251)  | 0.562(121)    | -0.0633  | 0.163  |
| bmrus.           | 0   | 0.88 | 0.515    | 0.539(522)  | 0.554(460)    | -0.0639  | 0.0981 |
| graza.           | 0   | 1.08 | 0.121    | 0.471(144)  | 0.552(66)     | -0.324   | 0.209  |
| greek.           | 0   | 0.97 | 0.639    | 0.542(186)  | 0.524(87)     | 0.0885   | 0.188  |
| norgs.           | 0   | 0.95 | 0.247    | 0.542(101)  | 0.498(315)    | 0.208    | 0.179  |
| noroe.           | 0   | 1.00 | 0.114    | 0.546(313)  | 0.513(4367)   | 0.136    | 0.0857 |

**1 0.98 1.01e-09 0.537(41917) 0.512(371549) 0.0574 0.0094**

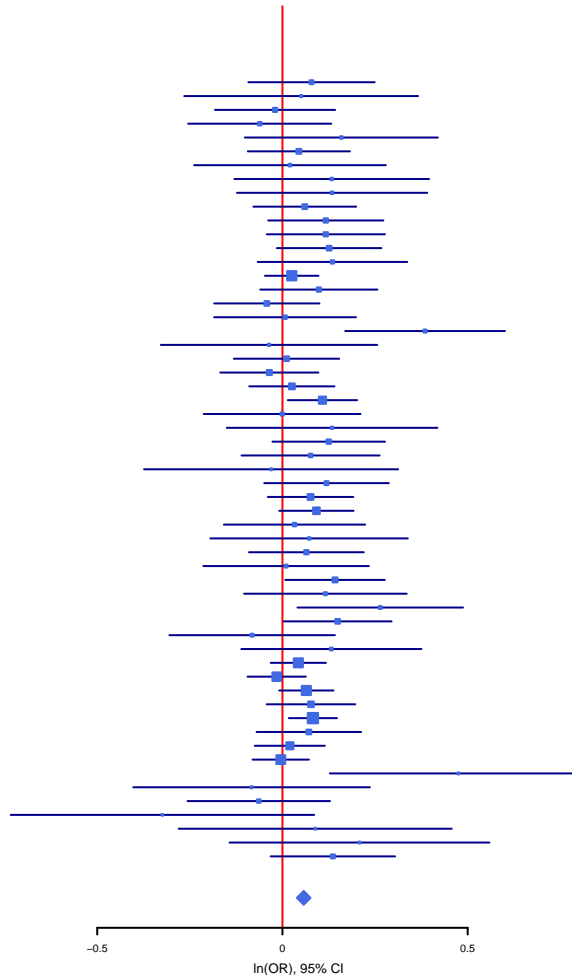

rs67712855

T/G

20:43682551

het\_P:

0.204

het\_I:

13.3

|            | ngt         | info            | p_value             | f_ca(n)              | f_co(n)       | ln(OR)        | STDerr |
|------------|-------------|-----------------|---------------------|----------------------|---------------|---------------|--------|
| bmaw.      | 0           | 1.00            | 0.811               | 0.711(329)           | 0.707(1810)   | 0.0223        | 0.0935 |
| bmw2.      | 0           | 1.01            | 0.525               | 0.692(181)           | 0.678(478)    | 0.108         | 0.17   |
| bmw3.      | 0           | 1.00            | 0.0113              | 0.716(489)           | 0.671(880)    | 0.227         | 0.0897 |
| bmw4.      | 0           | 1.01            | 0.674(410)          | 0.674(899)           | 0.674(899)    | 0.125         | 0.101  |
| bmsp.      | 0           | 1.05            | 0.84                | 0.675(253)           | 0.655(291)    | 0.0288        | 0.143  |
| bonn.      | 0           | 1.00            | 0.486               | 0.709(669)           | 0.702(1246)   | 0.0533        | 0.0764 |
| butr.      | 0           | 1.02            | 0.544               | 0.669(236)           | 0.651(236)    | 0.0825        | 0.136  |
| dub1.      | 0           | 1.02            | 0.239               | 0.747(150)           | 0.713(796)    | 0.168         | 0.143  |
| edf1.      | 0           | 0.98            | 0.613               | 0.717(275)           | 0.726(272)    | 0.0731        | 0.145  |
| fal2.      | 0           | 0.98            | 0.166               | 0.705(722)           | 0.689(1027)   | 0.107         | 0.0773 |
| fran.      | 0           | 0.98            | 0.935               | 0.685(451)           | 0.686(1630)   | 0.00678       | 0.0826 |
| gain.      | 0           | 0.96            | 0.537               | 0.685(706)           | 0.683(593)    | 0.0541        | 0.0877 |
| gsk1.      | 0           | 0.99            | 0.873               | 0.721(706)           | 0.721(899)    | -0.013        | 0.0811 |
| hal2.      | 0           | 0.98            | 0.00145             | 0.741(410)           | 0.665(479)    | 0.353         | 0.111  |
| icuk.      | 0           | 1.00            | 0.635               | 0.720(2456)          | 0.716(4069)   | 0.0193        | 0.0406 |
| jst5.      | 0           | 1.01            | 0.262               | 0.690(646)           | 0.708(643)    | -0.0971       | 0.0865 |
| may1.      | 0           | 1.02            | 0.105               | 0.703(929)           | 0.723(759)    | -0.127        | 0.0782 |
| nich.      | 0           | 1.02            | 0.607               | 0.700(481)           | 0.711(399)    | -0.0541       | 0.105  |
| plf1.      | 0           | 0.94            | 0.786               | 0.728(375)           | 0.713(346)    | 0.0368        | 0.124  |
| rom3.      | 0           | 1.02            | 0.128               | 0.710(233)           | 0.669(198)    | 0.234         | 0.153  |
| st2c.      | 0           | 0.99            | 0.348               | 0.684(628)           | 0.679(1219)   | 0.0741        | 0.0789 |
| stp1.      | 0           | 1.00            | 0.751               | 0.706(920)           | 0.699(973)    | 0.0228        | 0.0721 |
| swa2.      | 0           | 0.98            | 0.0215              | 0.703(885)           | 0.680(2252)   | 0.148         | 0.0645 |
| swei.      | 0           | 1.01            | 0.0367              | 0.707(1278)          | 0.691(3669)   | 0.107         | 0.0511 |
| top7.      | 0           | 1.02            | 0.477               | 0.720(416)           | 0.703(350)    | 0.0842        | 0.118  |
| top8.      | 0           | 1.00            | 0.935               | 0.706(148)           | 0.698(291)    | 0.0132        | 0.161  |
| uc12.      | 0           | 0.99            | 0.121               | 0.749(726)           | 0.723(693)    | 0.134         | 0.0865 |
| uclo.      | 0           | 1.07            | 0.0224              | 0.755(427)           | 0.701(488)    | 0.24          | 0.105  |
| uktr.      | 0           | 0.89            | 0.267               | 0.685(130)           | 0.727(130)    | -0.228        | 0.205  |
| ume4.      | 0           | 0.98            | 0.458               | 0.717(565)           | 0.704(569)    | 0.07          | 0.0943 |
| usc2.      | 0           | 1.02            | 0.126               | 0.701(1293)          | 0.670(1156)   | 0.0969        | 0.0632 |
| wtcc.      | 0           | 0.97            | 0.0116              | 0.727(1644)          | 0.696(1641)   | 0.143         | 0.0567 |
| jea2.      | 0           | 0.96            | 0.223               | 0.677(372)           | 0.656(628)    | 0.125         | 0.102  |
| kfo4.      | 0           | 1.02            | 0.835               | 0.682(247)           | 0.684(288)    | 0.0292        | 0.14   |
| tkc2.      | 0           | 0.98            | 0.374               | 0.698(1032)          | 0.685(499)    | 0.0756        | 0.085  |
| bdrs.      | 0           | 0.98            | 0.423               | 0.718(218)           | 0.698(684)    | 0.101         | 0.126  |
| dutch.     | 0           | 1.01            | 0.695               | 0.717(831)           | 0.710(953)    | 0.0294        | 0.075  |
| gawil.     | 0           | 1.03            | 0.101               | 0.660(268)           | 0.697(502)    | -0.188        | 0.115  |
| germ1.     | 0           | 0.98            | 0.676               | 0.699(219)           | 0.697(992)    | 0.0501        | 0.12   |
| gpcw1.     | 0           | 0.98            | 0.922               | 0.693(447)           | 0.685(2092)   | -0.0783       | 0.0804 |
| neu1.      | 0           | 1.02            | 0.521               | 0.689(215)           | 0.702(750)    | -0.0768       | 0.12   |
| spsp3.     | 0           | 1.02            | 0.621               | 0.684(153)           | 0.673(2337)   | 0.0631        | 0.127  |
| swed1.     | 0           | 0.99            | 0.38                | 0.699(2909)          | 0.689(2844)   | 0.0361        | 0.0411 |
| ukwa1.     | 0           | 0.99            | 3.38e-05            | 0.730(2789)          | 0.694(2372)   | 0.184         | 0.0444 |
| usaw4.     | 0           | 1.01            | 0.434               | 0.685(2956)          | 0.676(2930)   | 0.0311        | 0.0397 |
| usaw5.     | 0           | 0.98            | 0.0113              | 0.707(1107)          | 0.666(1316)   | 0.167         | 0.0659 |
| deCODE.    | 0           | 1.00            | 0.043               | 0.674(1972)          | 0.674(192802) | 0.0726        | 0.0359 |
| HUNT.      | 0           | 1.00            | 0.296               | 0.713(905)           | 0.699(41914)  | 0.0545        | 0.0523 |
| iPSYCH.    | 0           | 0.98            | 0.639               | 0.712(1758)          | 0.707(5937)   | 0.0201        | 0.0427 |
| UKBiobank. | 0           | 1.00            | 0.0726              | 0.727(1454)          | 0.712(58113)  | 0.331         | 0.184  |
| bmrom.     | 0           | 0.93            | 0.3                 | 0.685(225)           | 0.634(121)    | 0.187         | 0.181  |
| bmrus.     | 0           | 0.94            | 0.878               | 0.640(522)           | 0.642(460)    | 0.0153        | 0.0994 |
| graza.     | 0           | 1.15            | 0.548               | 0.632(144)           | 0.667(66)     | -0.129        | 0.214  |
| greek.     | 0           | 1.06            | 0.0637              | 0.646(186)           | 0.570(87)     | 0.347         | 0.187  |
| riorgs.    | 0           | 0.99            | 0.818               | 0.697(101)           | 0.716(315)    | -0.0438       | 0.191  |
| noroe.     | 0           | 1.02            | 0.134               | 0.743(313)           | 0.714(4367)   | 0.144         | 0.096  |
| <b>0</b>   | <b>1.00</b> | <b>4.22e-11</b> | <b>0.705(41917)</b> | <b>0.687(371549)</b> | <b>0.0677</b> | <b>0.0103</b> |        |

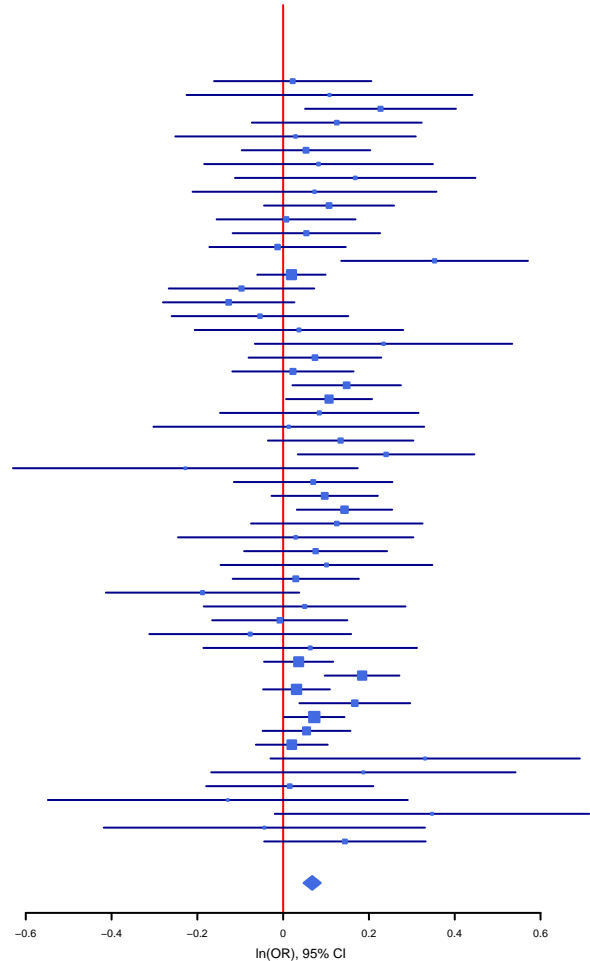

rs237460

C/T

20:48033127

het\_P:

0.0353

het\_I:

26.9

|                  | ngt      | info        | p_value         | f_ca(n)             | f_co(n)              | ln(OR)         | STDerr        |
|------------------|----------|-------------|-----------------|---------------------|----------------------|----------------|---------------|
| bmau.            | 0        | 1.02        | 0.943           | 0.573(329)          | 0.572(1810)          | 0.00608        | 0.0854        |
| bm2g.            | 0        | 0.95        | 0.842           | 0.558(181)          | 0.588(478)           | 0.0323         | 0.161         |
| bm3.             | 0        | 1.01        | 0.315           | 0.550(489)          | 0.572(880)           | -0.0824        | 0.0821        |
| bmpp.            | 0        | 1.01        | 0.453           | 0.545(410)          | 0.556(689)           | -0.0718        | 0.0956        |
| bmsp.            | 0        | 0.98        | 0.0999          | 0.512(253)          | 0.549(291)           | -0.228         | 0.138         |
| bonn.            | 0        | 1.01        | 0.278           | 0.545(669)          | 0.564(1246)          | -0.0756        | 0.0696        |
| butr.            | 0        | 1.08        | 0.234           | 0.498(236)          | 0.538(236)           | -0.15          | 0.126         |
| dub1.            | 0        | 0.95        | 0.0164          | 0.511(150)          | 0.538(796)           | 0.3318         | 0.133         |
| edf1.            | 0        | 1.01        | 0.78            | 0.557(275)          | 0.549(272)           | 0.0353         | 0.127         |
| fat2.            | 0        | 0.96        | 0.4             | 0.562(722)          | 0.555(1027)          | 0.0607         | 0.0722        |
| fran.            | 0        | 1.02        | 0.398           | 0.527(451)          | 0.542(1630)          | -0.0639        | 0.0757        |
| gain.            | 0        | 1.03        | 0.319           | 0.564(706)          | 0.582(593)           | -0.0788        | 0.0791        |
| gsk1.            | 0        | 0.98        | 0.926           | 0.575(706)          | 0.569(899)           | 0.00678        | 0.0734        |
| hai2.            | 0        | 1.02        | 0.0147          | 0.603(410)          | 0.533(479)           | 0.244          | 0.0999        |
| icuk.            | 0        | 1.01        | 0.0185          | 0.559(2456)         | 0.581(4069)          | -0.0868        | 0.0368        |
| jsf5.            | 0        | 1.01        | 0.908           | 0.563(646)          | 0.569(643)           | -0.00934       | 0.0803        |
| may1.            | 0        | 0.97        | 0.746           | 0.557(929)          | 0.564(759)           | -0.0237        | 0.073         |
| mich.            | 0        | 0.99        | 0.788           | 0.557(481)          | 0.566(399)           | -0.0264        | 0.098         |
| pf1e.            | 0        | 1.00        | 0.881           | 0.582(375)          | 0.573(346)           | 0.0164         | 0.11          |
| rom3.            | 0        | 0.99        | 0.161           | 0.532(233)          | 0.508(198)           | 0.204          | 0.146         |
| st2c.            | 0        | 0.97        | 0.903           | 0.556(628)          | 0.561(1219)          | -0.00904       | 0.0745        |
| stp1.            | 0        | 1.01        | 0.085           | 0.543(920)          | 0.568(973)           | -0.115         | 0.0665        |
| swa2.            | 0        | 1.00        | 0.618           | 0.584(865)          | 0.603(2252)          | -0.0296        | 0.0592        |
| swei.            | 0        | 1.00        | 0.3             | 0.582(1278)         | 0.592(3669)          | -0.0493        | 0.0476        |
| top7.            | 0        | 0.99        | 0.225           | 0.576(416)          | 0.617(350)           | -0.136         | 0.112         |
| top8.            | 0        | 1.04        | 0.857           | 0.564(148)          | 0.574(291)           | -0.0263        | 0.146         |
| ucl2.            | 0        | 1.04        | 0.0866          | 0.578(726)          | 0.611(693)           | -0.13          | 0.0758        |
| uclo.            | 0        | 1.00        | 0.479           | 0.582(427)          | 0.565(488)           | 0.068          | 0.0961        |
| uktr.            | 0        | 1.09        | 0.399           | 0.546(130)          | 0.585(130)           | -0.143         | 0.17          |
| umr4.            | 0        | 1.04        | 0.0749          | 0.534(955)          | 0.571(569)           | -0.15          | 0.0842        |
| usc2.            | 0        | 1.02        | 0.0249          | 0.545(1293)         | 0.575(1156)          | -0.133         | 0.0591        |
| wlcc.            | 0        | 1.02        | 0.142           | 0.559(1644)         | 0.579(1641)          | -0.0744        | 0.0507        |
| jea2.            | 0        | 1.01        | 0.17            | 0.530(372)          | 0.556(628)           | -0.129         | 0.0943        |
| kfo4.            | 0        | 1.07        | 0.516           | 0.553(247)          | 0.572(288)           | -0.0827        | 0.127         |
| tgco2.           | 0        | 1.00        | 0.212           | 0.573(1032)         | 0.599(499)           | -0.0987        | 0.0791        |
| bdtrs.           | 0        | 1.01        | 0.525           | 0.590(218)          | 0.608(684)           | -0.0721        | 0.114         |
| dutch.           | 0        | 0.98        | 0.0947          | 0.571(831)          | 0.600(953)           | -0.116         | 0.0694        |
| gawil.           | 0        | 1.01        | 0.122           | 0.532(268)          | 0.566(262)           | -0.169         | 0.139         |
| germ1.           | 0        | 0.98        | 0.0151          | 0.532(219)          | 0.597(992)           | -0.27          | 0.111         |
| gpcw1.           | 0        | 0.99        | 0.141           | 0.531(447)          | 0.560(2092)          | -0.11          | 0.075         |
| neuc1.           | 0        | 0.95        | 0.0729          | 0.526(215)          | 0.575(750)           | -0.206         | 0.115         |
| spsp3.           | 0        | 1.01        | 0.00087         | 0.448(153)          | 0.538(2337)          | -0.402         | 0.121         |
| swed1.           | 0        | 0.99        | 0.146           | 0.590(2909)         | 0.604(2844)          | -0.0564        | 0.0387        |
| ukwa1.           | 0        | 1.00        | 0.0061          | 0.561(2789)         | 0.591(2372)          | -0.111         | 0.0405        |
| usa4.            | 0        | 1.00        | 0.0279          | 0.541(256)          | 0.548(2930)          | -0.0321        | 0.0372        |
| usa5.            | 0        | 0.99        | 0.921           | 0.562(1107)         | 0.544(1316)          | 0.00598        | 0.0611        |
| deCODE.          | 0        | 1.00        | 0.362           | 0.599(1972)         | 0.599(192602)        | 0.0315         | 0.0345        |
| EstonianBiobank. | 1        | 1.00        | 0.393           | 0.536(407)          | 0.555(17209)         | -0.0611        | 0.0715        |
| HUNT.            | 0        | 1.00        | 0.23            | 0.559(905)          | 0.574(41914)         | -0.0582        | 0.0485        |
| iPSYCH.          | 0        | 1.00        | 0.711           | 0.600(1758)         | 0.604(5937)          | -0.0146        | 0.0392        |
| UKBiobank.       | 0        | 1.00        | 0.901           | 0.576(1454)         | 0.580(58113)         | -0.0215        | 0.173         |
| bmrom.           | 0        | 1.03        | 0.0279          | 0.541(256)          | 0.536(121)           | -0.04          | 0.168         |
| bmrus.           | 0        | 0.95        | 0.0237          | 0.514(522)          | 0.541(460)           | -0.112         | 0.0947        |
| graza.           | 0        | 1.06        | 0.407           | 0.579(144)          | 0.531(66)            | -0.174         | 0.21          |
| greek.           | 0        | 0.86        | 0.916           | 0.541(186)          | 0.534(87)            | -0.0213        | 0.203         |
| norgs.           | 0        | 0.96        | 0.694           | 0.578(101)          | 0.573(315)           | 0.0697         | 0.177         |
| noroe.           | 0        | 1.01        | 0.0209          | 0.527(313)          | 0.586(4367)          | -0.198         | 0.0855        |
|                  | <b>1</b> | <b>1.00</b> | <b>4.25e-09</b> | <b>0.563(41917)</b> | <b>0.588(371549)</b> | <b>-0.0553</b> | <b>0.0094</b> |

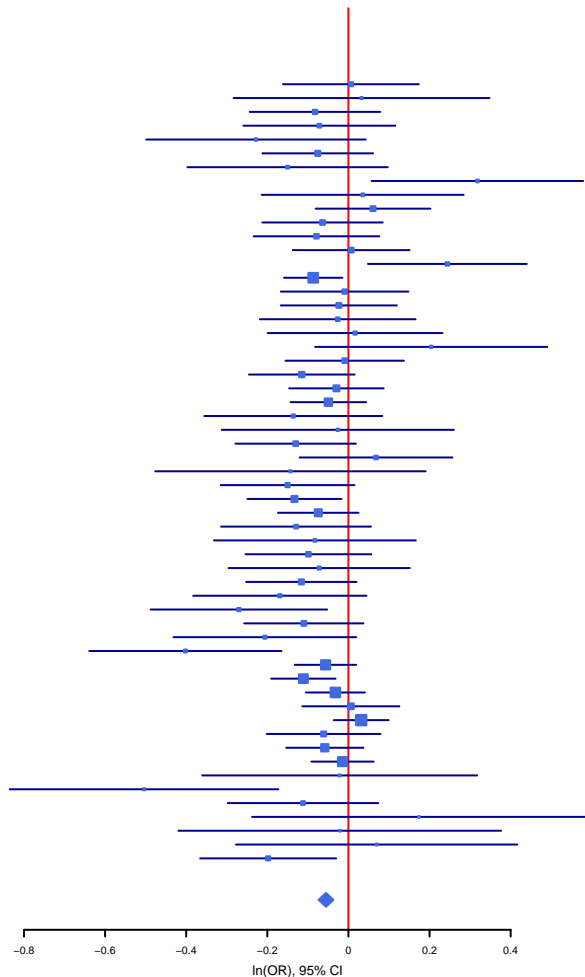

rs13044225

A/G

20:60865815

0.384

het\_I:

4.3

|            | ngt         | info           | p_value             | f_ca(n)              | f_co(n)        | ln(OR)        | STDerr |
|------------|-------------|----------------|---------------------|----------------------|----------------|---------------|--------|
| bmau.      | 0           | 0.96           | 0.41                | 0.522(329)           | 0.538(1810)    | -0.072        | 0.0875 |
| bmg2.      | 0           | 0.91           | 0.218               | 0.535(181)           | 0.554(478)     | -0.203        | 0.165  |
| bmg3.      | 0           | 1.01           | 0.0819              | 0.501(489)           | 0.534(880)     | -0.143        | 0.0821 |
| bmpq.      | 0           | 0.91           | 0.34(410)           | 0.534(410)           | 0.534(689)     | -0.12         | 0.101  |
| bmsp.      | 0           | 0.98           | 0.482               | 0.537(253)           | 0.540(291)     | -0.0964       | 0.137  |
| bonn.      | 0           | 1.01           | 0.118               | 0.508(669)           | 0.537(1246)    | -0.109        | 0.0685 |
| butr.      | 0           | 0.94           | 0.261               | 0.509(236)           | 0.545(236)     | -0.151        | 0.135  |
| dub1.      | 0           | 1.00           | 0.786               | 0.509(150)           | 0.517(796)     | -0.0345       | 0.127  |
| ed1.       | 0           | 0.95           | 0.0748              | 0.506(275)           | 0.546(272)     | -0.235        | 0.132  |
| fat2.      | 0           | 0.98           | 0.691               | 0.536(722)           | 0.532(1027)    | 0.0283        | 0.071  |
| fran.      | 0           | 0.95           | 0.946               | 0.549(451)           | 0.548(1630)    | -0.00531      | 0.0786 |
| gain.      | 0           | 0.98           | 0.198               | 0.537(706)           | 0.564(593)     | -0.104        | 0.0809 |
| gsk1.      | 0           | 1.03           | 0.356               | 0.522(706)           | 0.538(899)     | -0.0651       | 0.0705 |
| hal2.      | 0           | 1.06           | 0.157               | 0.518(410)           | 0.539(479)     | -0.137        | 0.0965 |
| icuk.      | 0           | 1.00           | 0.79                | 0.520(2456)          | 0.523(4069)    | -0.00975      | 0.0366 |
| jst5.      | 0           | 1.00           | 0.859               | 0.548(646)           | 0.544(643)     | 0.0141        | 0.0795 |
| may1.      | 0           | 0.99           | 0.323               | 0.527(929)           | 0.542(759)     | -0.0709       | 0.0717 |
| ritch.     | 0           | 0.98           | 0.0125              | 0.510(481)           | 0.572(399)     | -0.246        | 0.0987 |
| p1.        | 0           | 1.07           | 0.18                | 0.556(375)           | 0.534(346)     | -0.142        | 0.106  |
| rom3.      | 0           | 1.01           | 0.424               | 0.545(233)           | 0.585(198)     | -0.116        | 0.145  |
| st2c.      | 0           | 0.93           | 0.131               | 0.525(628)           | 0.566(1219)    | -0.114        | 0.0758 |
| stp1.      | 0           | 0.92           | 0.825               | 0.543(920)           | 0.543(973)     | 0.0153        | 0.0689 |
| swa2.      | 0           | 0.97           | 0.878               | 0.546(885)           | 0.547(2252)    | 0.00916       | 0.0598 |
| swei.      | 0           | 0.99           | 0.11                | 0.526(1278)          | 0.541(3669)    | -0.0753       | 0.0472 |
| top7.      | 0           | 0.96           | 0.753               | 0.543(416)           | 0.533(350)     | 0.0352        | 0.112  |
| top8.      | 0           | 0.98           | 0.874               | 0.534(148)           | 0.552(291)     | -0.0238       | 0.149  |
| ucl2.      | 0           | 1.03           | 0.649               | 0.530(726)           | 0.540(693)     | -0.0341       | 0.0749 |
| uclo.      | 0           | 0.92           | 0.423               | 0.520(427)           | 0.541(488)     | -0.0795       | 0.0991 |
| uktr.      | 0           | 0.94           | 0.414               | 0.558(130)           | 0.523(130)     | 0.149         | 0.182  |
| ume4.      | 0           | 0.97           | 0.208               | 0.503(565)           | 0.530(569)     | -0.108        | 0.0859 |
| usc2.      | 0           | 0.98           | 0.98                | 0.531(1293)          | 0.532(1156)    | 0.0015        | 0.0594 |
| wtoc.      | 0           | 0.94           | 0.247               | 0.514(1644)          | 0.524(1641)    | -0.0604       | 0.0522 |
| jes2.      | 0           | 0.95           | 0.544               | 0.569(372)           | 0.558(628)     | 0.0593        | 0.0978 |
| kfo4.      | 0           | 1.06           | 0.176               | 0.504(247)           | 0.529(288)     | -0.175        | 0.13   |
| tgco2.     | 0           | 0.97           | 0.131               | 0.520(1032)          | 0.490(499)     | 0.12          | 0.0793 |
| bdtrs.     | 0           | 1.01           | 0.59                | 0.562(218)           | 0.548(684)     | 0.0603        | 0.112  |
| dutch.     | 0           | 0.97           | 0.0433              | 0.499(831)           | 0.531(953)     | -0.14         | 0.0692 |
| gawii.     | 0           | 1.02           | 0.463               | 0.521(268)           | 0.548(502)     | -0.0795       | 0.108  |
| germ1.     | 0           | 1.03           | 0.0384              | 0.465(219)           | 0.526(992)     | -0.222        | 0.107  |
| gpcw1.     | 0           | 1.00           | 0.167               | 0.516(447)           | 0.544(2092)    | -0.103        | 0.0742 |
| net1.      | 0           | 1.00           | 0.0901              | 0.531(215)           | 0.502(750)     | 0.189         | 0.112  |
| spsp3.     | 0           | 0.97           | 0.607               | 0.542(153)           | 0.552(2337)    | -0.0629       | 0.122  |
| swed1.     | 0           | 0.97           | 0.0628              | 0.532(2909)          | 0.551(2844)    | -0.0717       | 0.0385 |
| ukwa1.     | 0           | 1.01           | 0.0159              | 0.506(2789)          | 0.533(2372)    | -0.096        | 0.0398 |
| usaw4.     | 0           | 1.00           | 0.286               | 0.525(2956)          | 0.535(2930)    | -0.0397       | 0.0371 |
| usaw5.     | 0           | 0.98           | 0.91                | 0.537(1107)          | 0.538(1316)    | 0.00688       | 0.0608 |
| deCODE.    | 0           | 1.00           | 0.604               | 0.584(1972)          | 0.584(192602)  | -0.0178       | 0.0344 |
| HUNT.      | 0           | 1.00           | 0.0035              | 0.465(905)           | 0.520(41914)   | -0.141        | 0.0482 |
| IPSYCH.    | 0           | 0.98           | 0.414               | 0.538(1758)          | 0.546(5837)    | -0.0319       | 0.039  |
| UKBiobank. | 0           | 1.00           | 0.0184              | 0.511(1454)          | 0.533(58113)   | -0.406        | 0.172  |
| bmrom.     | 0           | 1.01           | 0.496               | 0.535(225)           | 0.545(121)     | -0.112        | 0.165  |
| bmrus.     | 0           | 0.96           | 0.239               | 0.570(522)           | 0.591(460)     | -0.112        | 0.0954 |
| graza.     | 0           | 1.06           | 0.213               | 0.537(144)           | 0.605(66)      | -0.262        | 0.211  |
| greek.     | 0           | 0.92           | 0.185               | 0.542(186)           | 0.594(87)      | -0.264        | 0.199  |
| noigs.     | 0           | 0.96           | 0.0979              | 0.503(101)           | 0.555(315)     | -0.291        | 0.1176 |
| noroe.     | 0           | 0.98           | 0.451               | 0.525(313)           | 0.535(4367)    | -0.0654       | 0.0667 |
| <b>0</b>   | <b>0.98</b> | <b>8.5e-09</b> | <b>0.528(41917)</b> | <b>0.560(371549)</b> | <b>-0.0547</b> | <b>0.0095</b> |        |

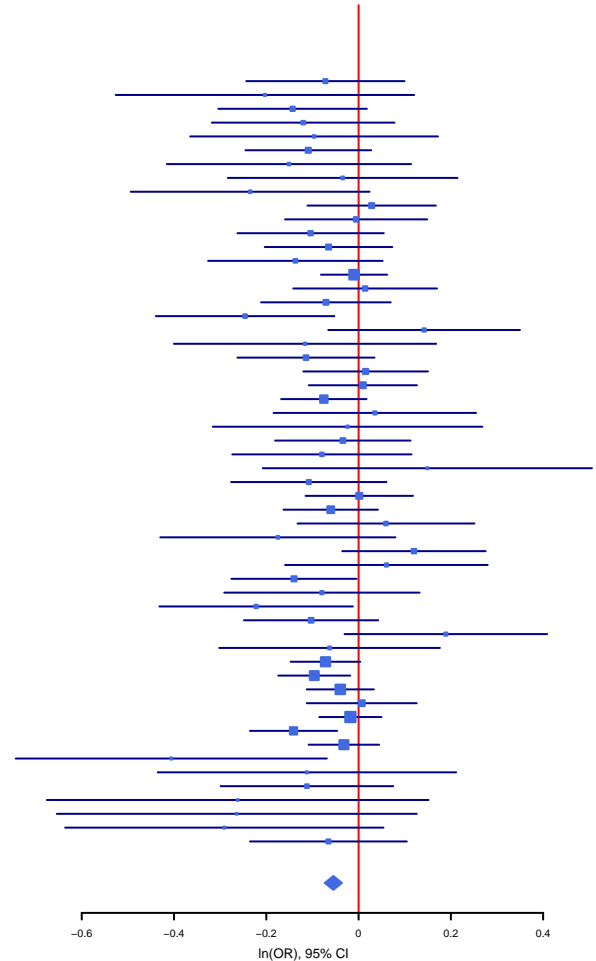

rs5758064

T/C

22:41153879

het\_P:

0.332

het\_I:

6.7

|                  | ngt         | info            | p_value             | f_ca(n)              | f_co(n)       | ln(OR)        | STDerr |
|------------------|-------------|-----------------|---------------------|----------------------|---------------|---------------|--------|
| bmau.            | 0           | 0.95            | 0.167               | 0.545(329)           | 0.515(1810)   | 0.121         | 0.0877 |
| bm2g.            | 1           | 0.90            | 0.264               | 0.514(181)           | 0.476(478)    | 0.181         | 0.163  |
| bm3.             | 0           | 0.99            | 0.0375              | 0.534(489)           | 0.499(880)    | 0.172         | 0.0828 |
| bmpo.            | 0           | 0.96            | 0.854               | 0.490(410)           | 0.487(689)    | -0.0181       | 0.0982 |
| bmsp.            | 0           | 0.91            | 0.99                | 0.504(253)           | 0.499(291)    | -0.0017       | 0.142  |
| bonn.            | 0           | 0.96            | 0.114               | 0.526(669)           | 0.492(1246)   | 0.112         | 0.0708 |
| butr.            | 1           | 0.99            | 0.555               | 0.500(236)           | 0.481(236)    | 0.0773        | 0.131  |
| dub1.            | 1           | 1.05            | 0.07                | 0.571(796)           | 0.57(796)     | 0.104         | 0.27   |
| edf1.            | 0           | 0.98            | 0.773               | 0.503(275)           | 0.515(272)    | -0.0369       | 0.128  |
| fat2.            | 1           | 0.98            | 0.00446             | 0.542(722)           | 0.495(1027)   | 0.202         | 0.0711 |
| fran.            | 0           | 0.99            | 0.396               | 0.501(451)           | 0.490(1630)   | 0.0653        | 0.077  |
| gain.            | 1           | 1.00            | 0.935               | 0.499(706)           | 0.499(593)    | -0.00652      | 0.0794 |
| gsk1.            | 0           | 0.99            | 0.168               | 0.565(706)           | 0.540(899)    | 0.0997        | 0.0723 |
| hai2.            | 1           | 1.05            | 0.368               | 0.538(410)           | 0.518(479)    | 0.0873        | 0.097  |
| icuk.            | 0           | 0.99            | 0.0169              | 0.543(2456)          | 0.520(4069)   | 0.0892        | 0.0369 |
| jsi5.            | 0           | 0.95            | 0.16                | 0.506(646)           | 0.533(643)    | -0.115        | 0.0818 |
| may1.            | 1           | 0.94            | 0.0759              | 0.537(929)           | 0.509(759)    | 0.131         | 0.0737 |
| mich.            | 0           | 1.01            | 0.457               | 0.516(481)           | 0.498(399)    | 0.0716        | 0.0961 |
| pf1e.            | 1           | 1.02            | 0.992               | 0.521(375)           | 0.519(346)    | 0.0011        | 0.107  |
| rom3.            | 1           | 1.09            | 0.17                | 0.511(233)           | 0.470(198)    | 0.189         | 0.138  |
| si2c.            | 0           | 1.02            | 0.659               | 0.526(628)           | 0.509(1219)   | 0.0319        | 0.0725 |
| stp1.            | 0           | 0.92            | 0.104               | 0.539(920)           | 0.510(973)    | 0.113         | 0.0692 |
| swa2.            | 1           | 1.01            | 0.081               | 0.51(896)            | 0.501(2252)   | 0.103         | 0.0592 |
| swei.            | 1           | 1.01            | 0.0151              | 0.529(1278)          | 0.505(3669)   | 0.113         | 0.0465 |
| top7.            | 1           | 1.01            | 0.492               | 0.526(416)           | 0.506(350)    | 0.0746        | 0.109  |
| top8.            | 1           | 1.03            | 0.873               | 0.544(148)           | 0.544(291)    | -0.0234       | 0.146  |
| ucl2.            | 1           | 1.08            | 0.551               | 0.496(726)           | 0.483(693)    | 0.0435        | 0.0729 |
| ucio.            | 0           | 0.97            | 0.744               | 0.530(427)           | 0.519(488)    | 0.0315        | 0.0963 |
| uktr.            | 1           | 1.12            | 0.196               | 0.488(130)           | 0.500(130)    | -0.221        | 0.167  |
| umr4.            | 1           | 0.93            | 0.478               | 0.524(565)           | 0.511(569)    | 0.0624        | 0.088  |
| usc2.            | 1           | 0.99            | 0.0167              | 0.537(1293)          | 0.498(1156)   | 0.141         | 0.0591 |
| wlcc.            | 0           | 0.96            | 0.849               | 0.526(1644)          | 0.519(1641)   | 0.00975       | 0.0516 |
| jea2.            | 0           | 0.94            | 0.0683              | 0.492(372)           | 0.459(628)    | 0.178         | 0.0975 |
| kfo4.            | 1           | 1.01            | 0.69                | 0.505(247)           | 0.479(288)    | 0.052         | 0.131  |
| tgco2.           | 1           | 1.00            | 0.762               | 0.533(1032)          | 0.529(499)    | 0.0236        | 0.078  |
| bdrs.            | 1           | 1.02            | 0.584               | 0.502(218)           | 0.520(684)    | -0.0606       | 0.111  |
| dutch.           | 1           | 1.04            | 0.109               | 0.485(831)           | 0.514(953)    | -0.107        | 0.0665 |
| gawil.           | 1           | 1.05            | 0.05                | 0.527(268)           | 0.487(502)    | 0.253         | 0.107  |
| germ1.           | 1           | 1.01            | 0.877               | 0.488(219)           | 0.489(992)    | -0.0168       | 0.109  |
| gpcw1.           | 1           | 0.98            | 0.351               | 0.537(447)           | 0.518(2092)   | 0.07          | 0.0751 |
| neuc1.           | 1           | 1.04            | 0.651               | 0.526(215)           | 0.521(750)    | 0.0496        | 0.11   |
| spsp3.           | 1           | 0.99            | 0.938               | 0.474(153)           | 0.475(2337)   | -0.00934      | 0.12   |
| swed1.           | 1           | 1.03            | 0.471               | 0.516(2909)          | 0.511(2844)   | 0.0269        | 0.0374 |
| ukwa1.           | 0           | 0.99            | 0.0131              | 0.539(2789)          | 0.513(2372)   | 0.1           | 0.0404 |
| usa4.            | 1           | 1.02            | 0.05                | 0.527(296)           | 0.526(2930)   | 0.00698       | 0.0368 |
| usa5.            | 1           | 1.02            | 0.117               | 0.512(1107)          | 0.542(1316)   | -0.0937       | 0.0597 |
| deCODE.          | 0           | 1.00            | 0.337               | 0.533(1972)          | 0.533(192602) | 0.0325        | 0.0339 |
| EstonianBiobank. | 1           | 0.99            | 0.102               | 0.510(407)           | 0.477(17209)  | 0.117         | 0.0717 |
| HUNT.            | 1           | 1.00            | 0.754               | 0.516(905)           | 0.520(41914)  | -0.0151       | 0.048  |
| iPSYCH.          | 1           | 1.00            | 0.351               | 0.522(1758)          | 0.512(5937)   | 0.0359        | 0.0386 |
| UKBiobank.       | 0           | 1.00            | 0.833               | 0.521(1454)          | 0.520(58113)  | -0.0364       | 0.172  |
| bmron.           | 1           | 1.01            | 0.057               | 0.544(251)           | 0.475(121)    | 0.314         | 0.6    |
| bmrus.           | 1           | 0.99            | 0.225               | 0.487(522)           | 0.452(460)    | 0.113         | 0.0933 |
| graza.           | 1           | 0.97            | 0.994               | 0.517(144)           | 0.523(66)     | 0.0018        | 0.22   |
| greek.           | 1           | 1.00            | 0.242               | 0.511(186)           | 0.563(87)     | -0.22         | 0.188  |
| norgs.           | 1           | 0.94            | 0.839               | 0.535(101)           | 0.521(315)    | -0.036        | 0.177  |
| noroe.           | 0           | 1.03            | 0.921               | 0.524(313)           | 0.521(4367)   | 0.00827       | 0.084  |
| <b>38</b>        | <b>1.00</b> | <b>2.01e-08</b> | <b>0.524(41917)</b> | <b>0.523(371549)</b> | <b>0.0524</b> | <b>0.0093</b> |        |

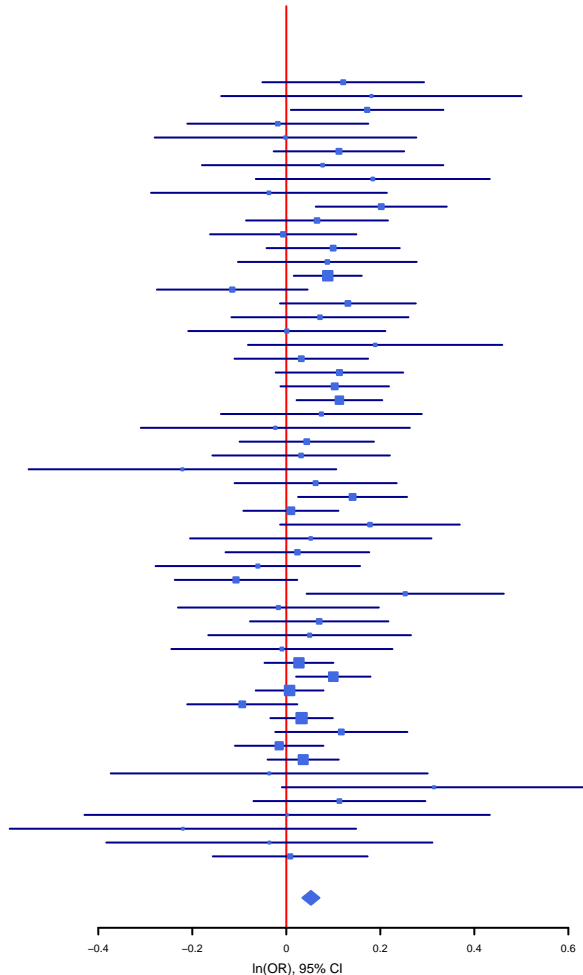

Supplement: Supplementary file [file 2020.09.17.20187054-3.pdf]
