# Supplementary material for: Genome-wide association study of over 40,000 bipolar disorder cases provides new insights into the underlying biology
Source: bioRxiv or medRxiv preprint supplement (doi:10.1101/2020.09.17.20187054), 2021-03-27
Supplement: Supplementary file [file 2020.09.17.20187054-1.pdf]

**Supplementary Figures: Genome-wide association study of over 40,000 bipolar disorder cases provides novel biological insights**

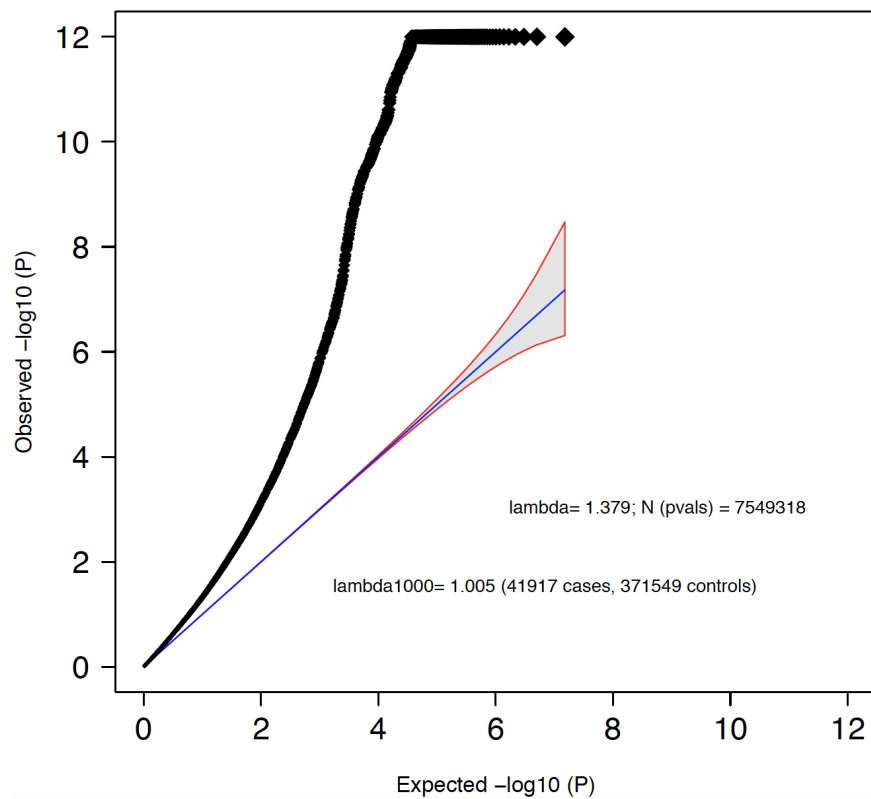

**Supplementary Figure 1: Quantile-quantile plot of association test results from genome-wide association meta-analysis of bipolar disorder**

The y axis is truncated at  $P=1E-12$ . SNPs plotted have a minor allele frequency  $\geq 1\%$  and an imputation INFO score  $\geq 0.6$ .

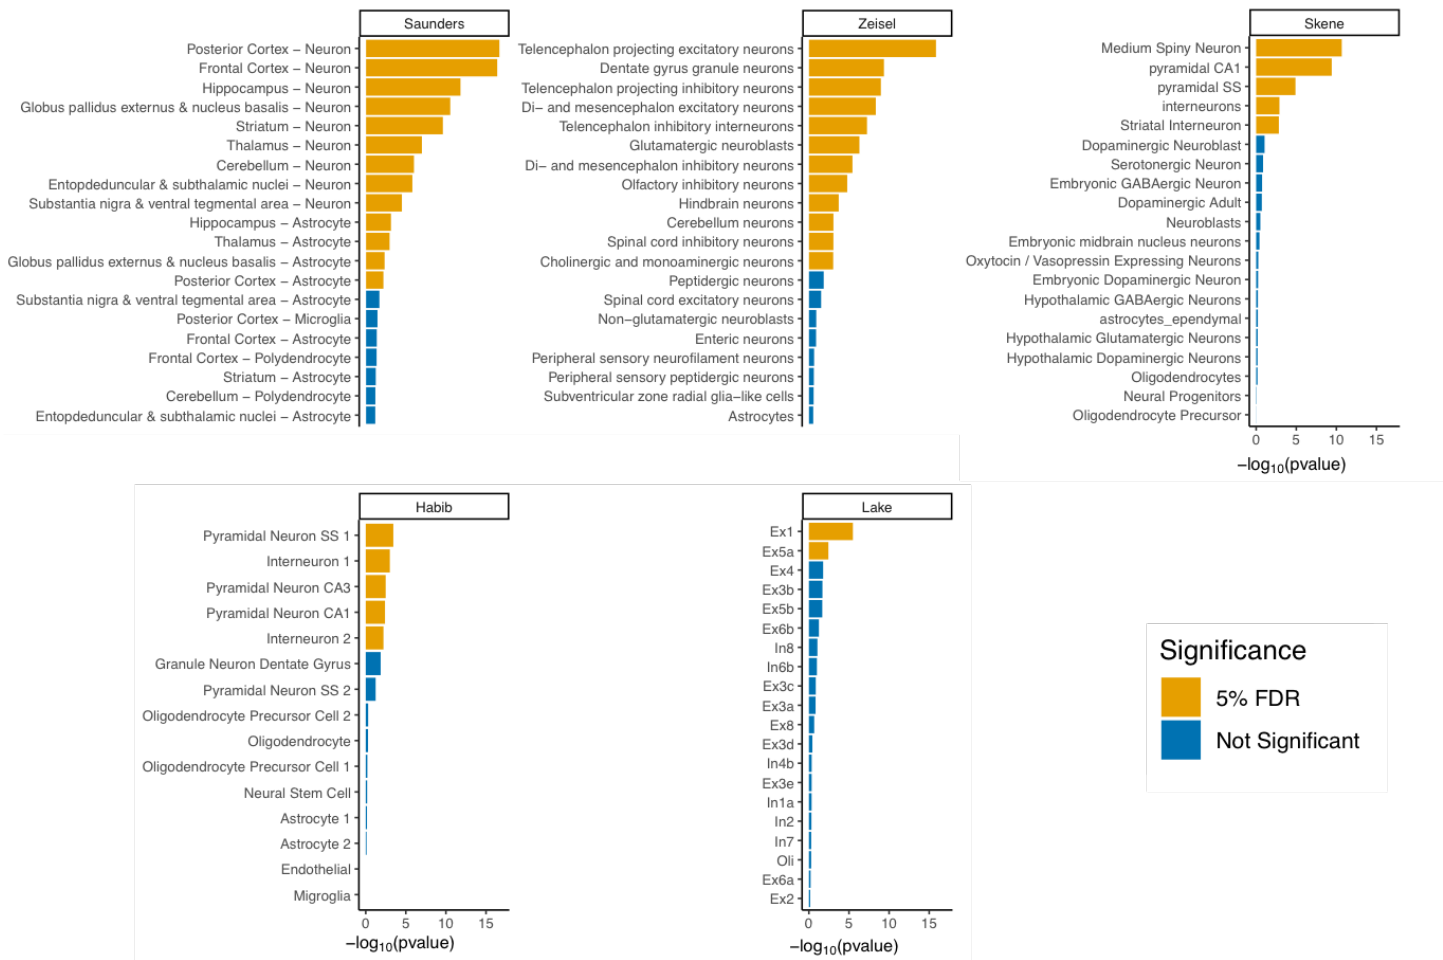

### Supplementary Figure 2: Top brain cell types enriched for bipolar disorder association signal

The significance level ( $-\log_{10}(p \text{ value})$ ) of MAGMA is shown for the top 20 most associated cell types in diverse datasets. The genes tested for each cell type are the top 10% of genes most specifically expressed in that cell type compared with all other cell types in the dataset. The color indicates whether the cell type is enriched for BD association signal at a 5% false discovery rate (FDR) across datasets. The Zeisel, Saunders and Skene datasets are derived from mouse samples, while the Habib and Lake datasets are derived from human samples. SS - somato-sensory cortex, Ex - excitatory, In - inhibitory, Oli - oligodendrocyte. The numbers after the cell types refer to the cluster of cells with a similar gene expression profile, defined using clustering algorithms in the original publications.

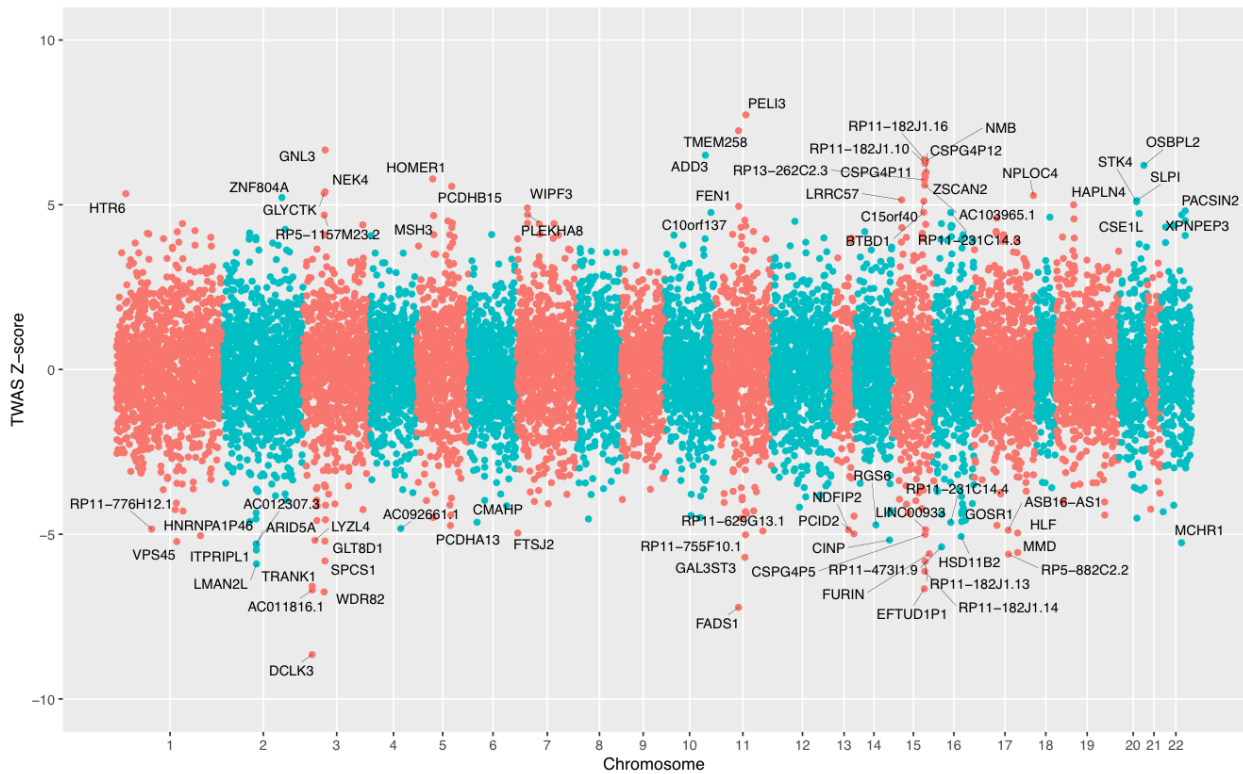

**Supplementary Figure 3: Results of transcriptome-wide association study of BD performed using FUSION and eQTL data from the PsychENCODE Consortium**

Genes which are labeled passed the Bonferroni corrected significance threshold of  $P < 3.72E-06$ , adjusting for 13,435 genes tested. TWAS Z-score - direction of effect of bipolar disorder risk alleles on predicted gene expression level

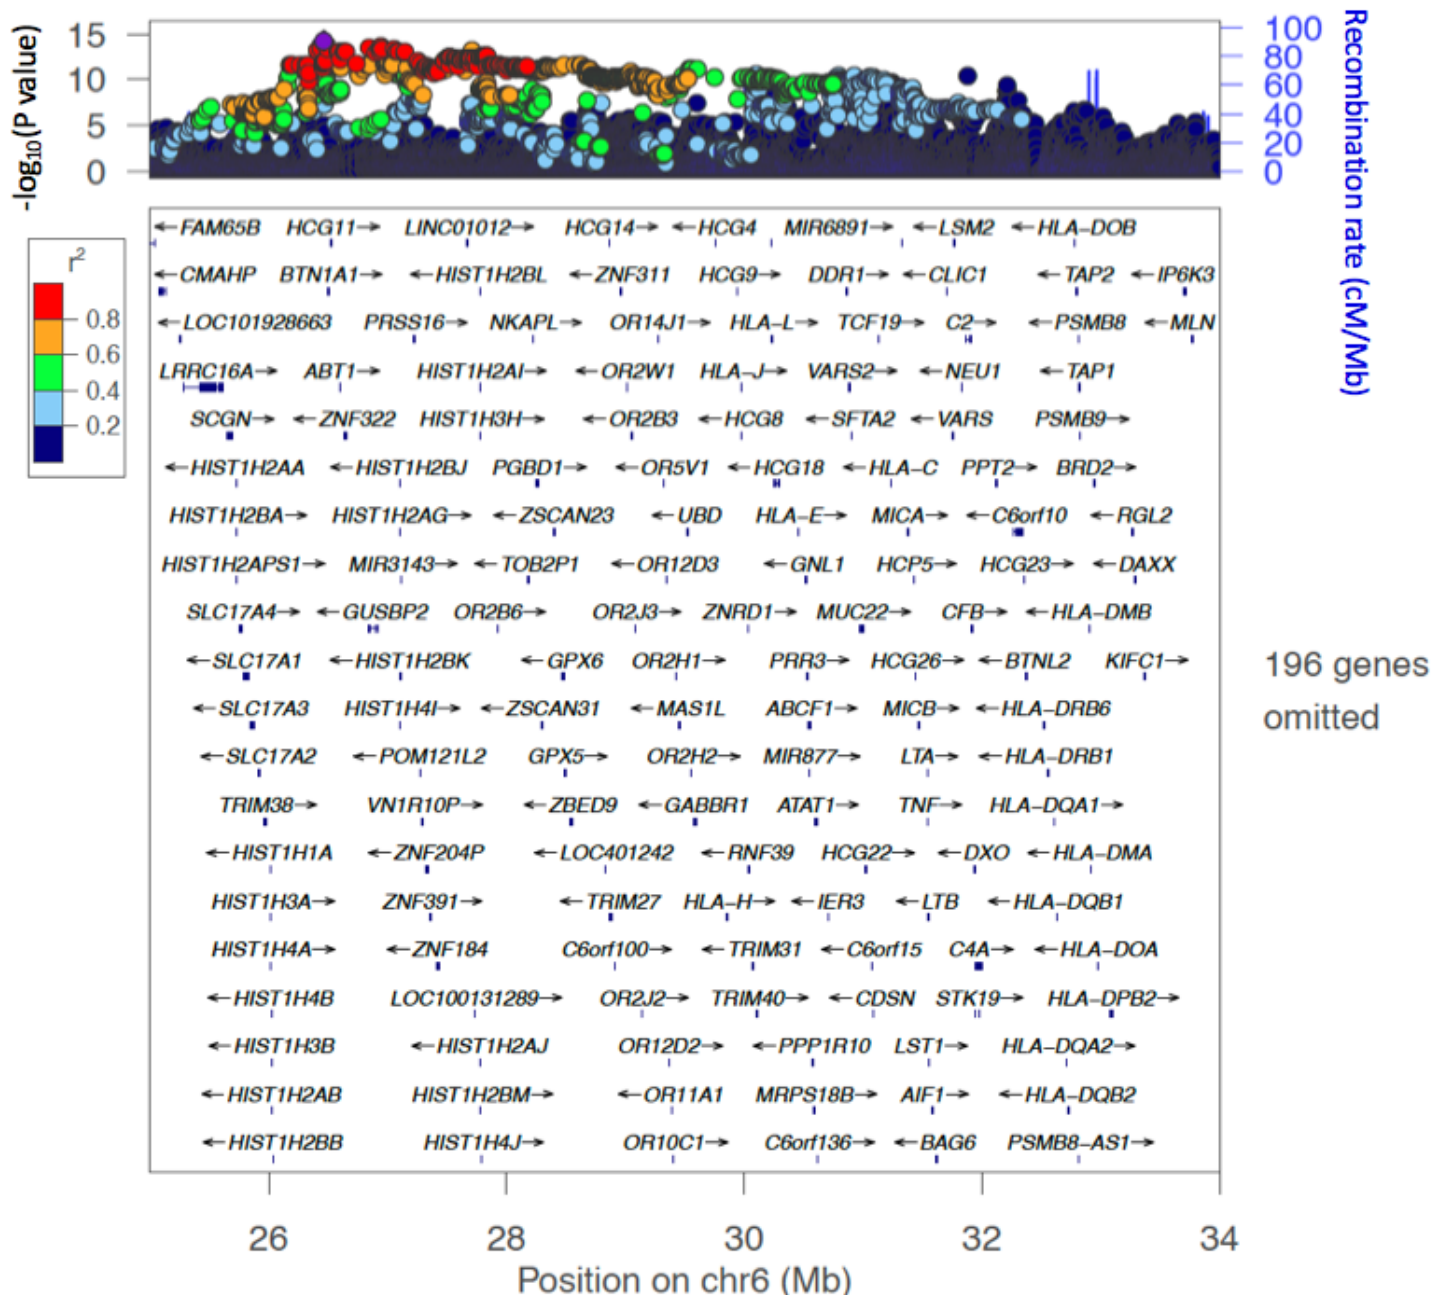

**Supplementary Figure 4: Regional plot of bipolar disorder association statistics in the extended major histocompatibility complex (MHC)**

The x axis shows genomic position and the y axis shows statistical significance as  $-\log_{10}(P \text{ value})$ . SNPs are colored by linkage disequilibrium ( $r^2$ ) to the top lead SNP rs13195402, which is shown as a purple diamond.

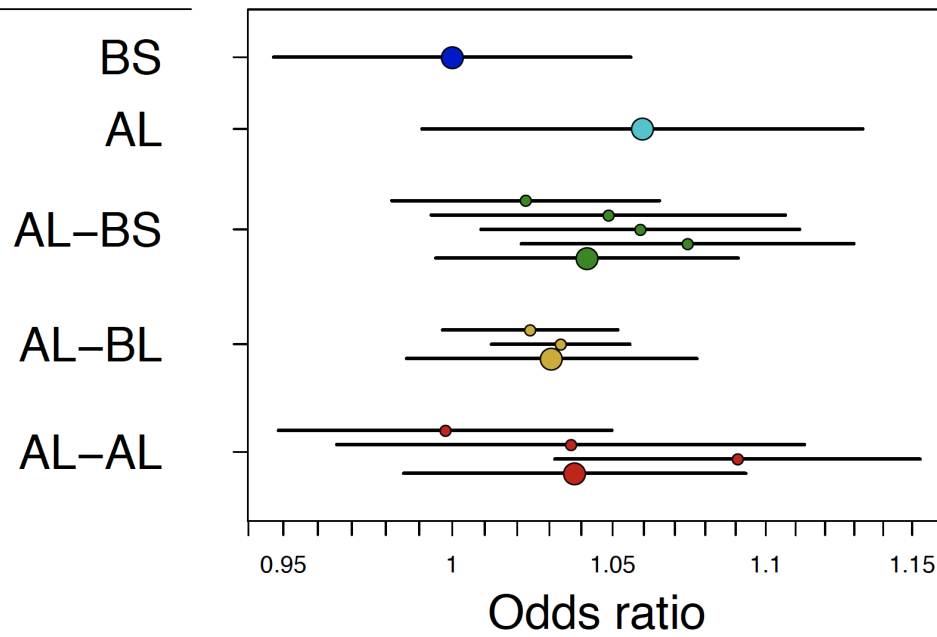

**Supplementary Figure 5: Odds ratio for bipolar disorder for the five most common *C4* locus structures, in a joint analysis that includes lead SNP rs13195402**

Error bars represent the 95% confidence interval. Odds ratios are calculated relative to the BS haplotype. Because many *C4* alleles have arisen on multiple SNP haplotype backgrounds, results are shown for each specific haplogroup (small circles) as well as their combined association (large circles). There is no clear difference in bipolar disorder risk levels across these *C4* haplotypes.

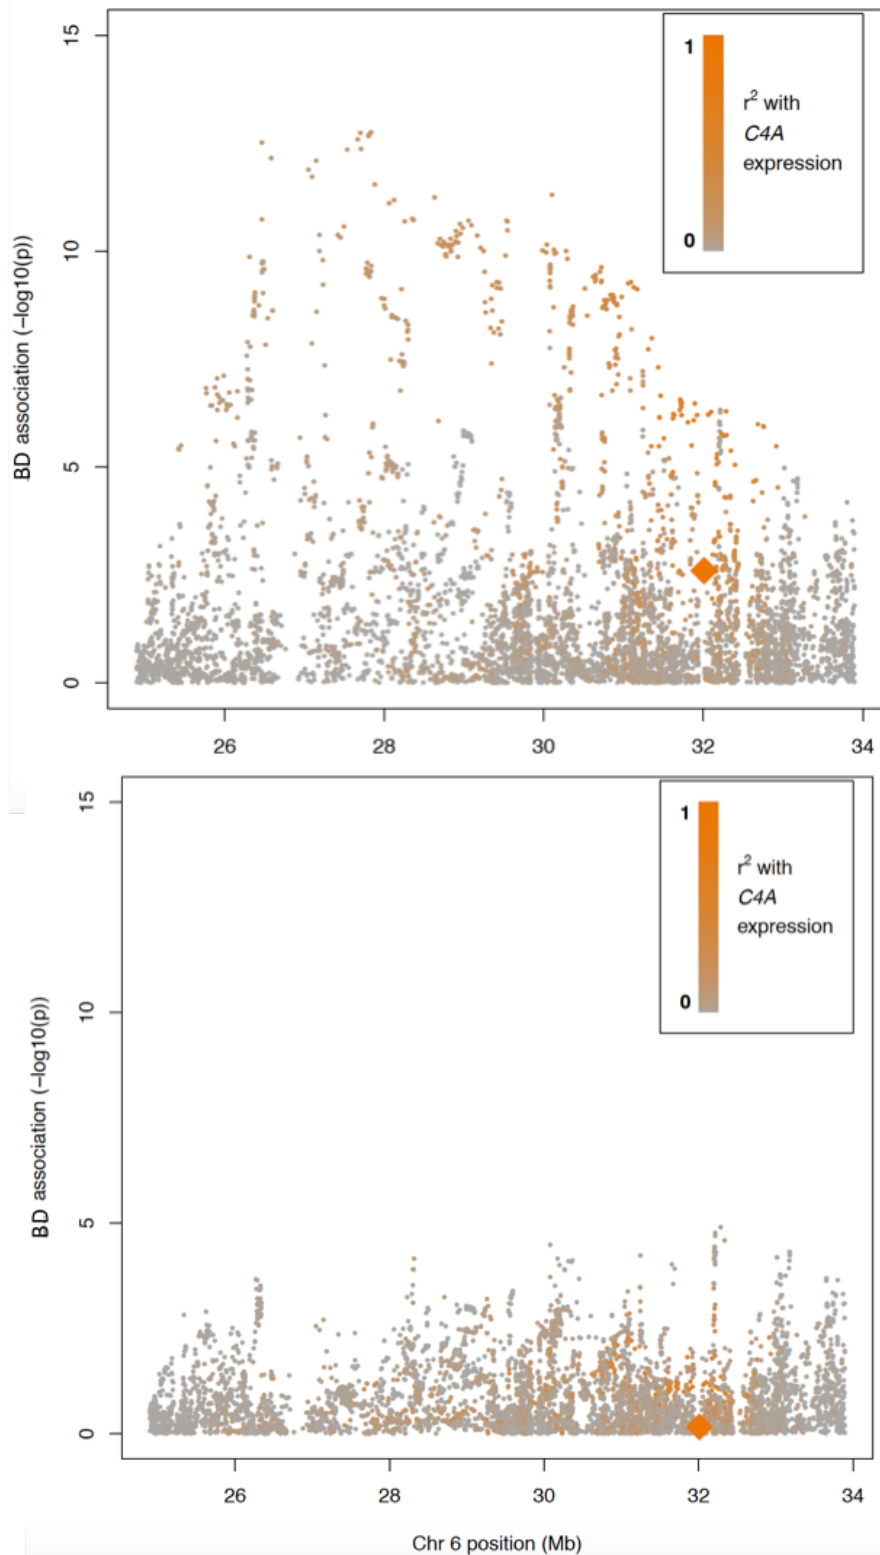

**Supplementary Figure 6: Association of bipolar disorder to chromosome 6 variation around and within the MHC locus, including genetically predicted expression of C4A**

The height of each point represents the statistical strength ( $-\log_{10}(P \text{ value})$ ) of association with bipolar disorder (BD). Genetically predicted C4A expression is represented by the orange diamond. SNPs are colored by their level of correlation to genetically predicted C4A expression level. Above: unconditioned analysis. Below: Analysis conditional on rs13195402 (lead SNP in this region of chromosome 6).

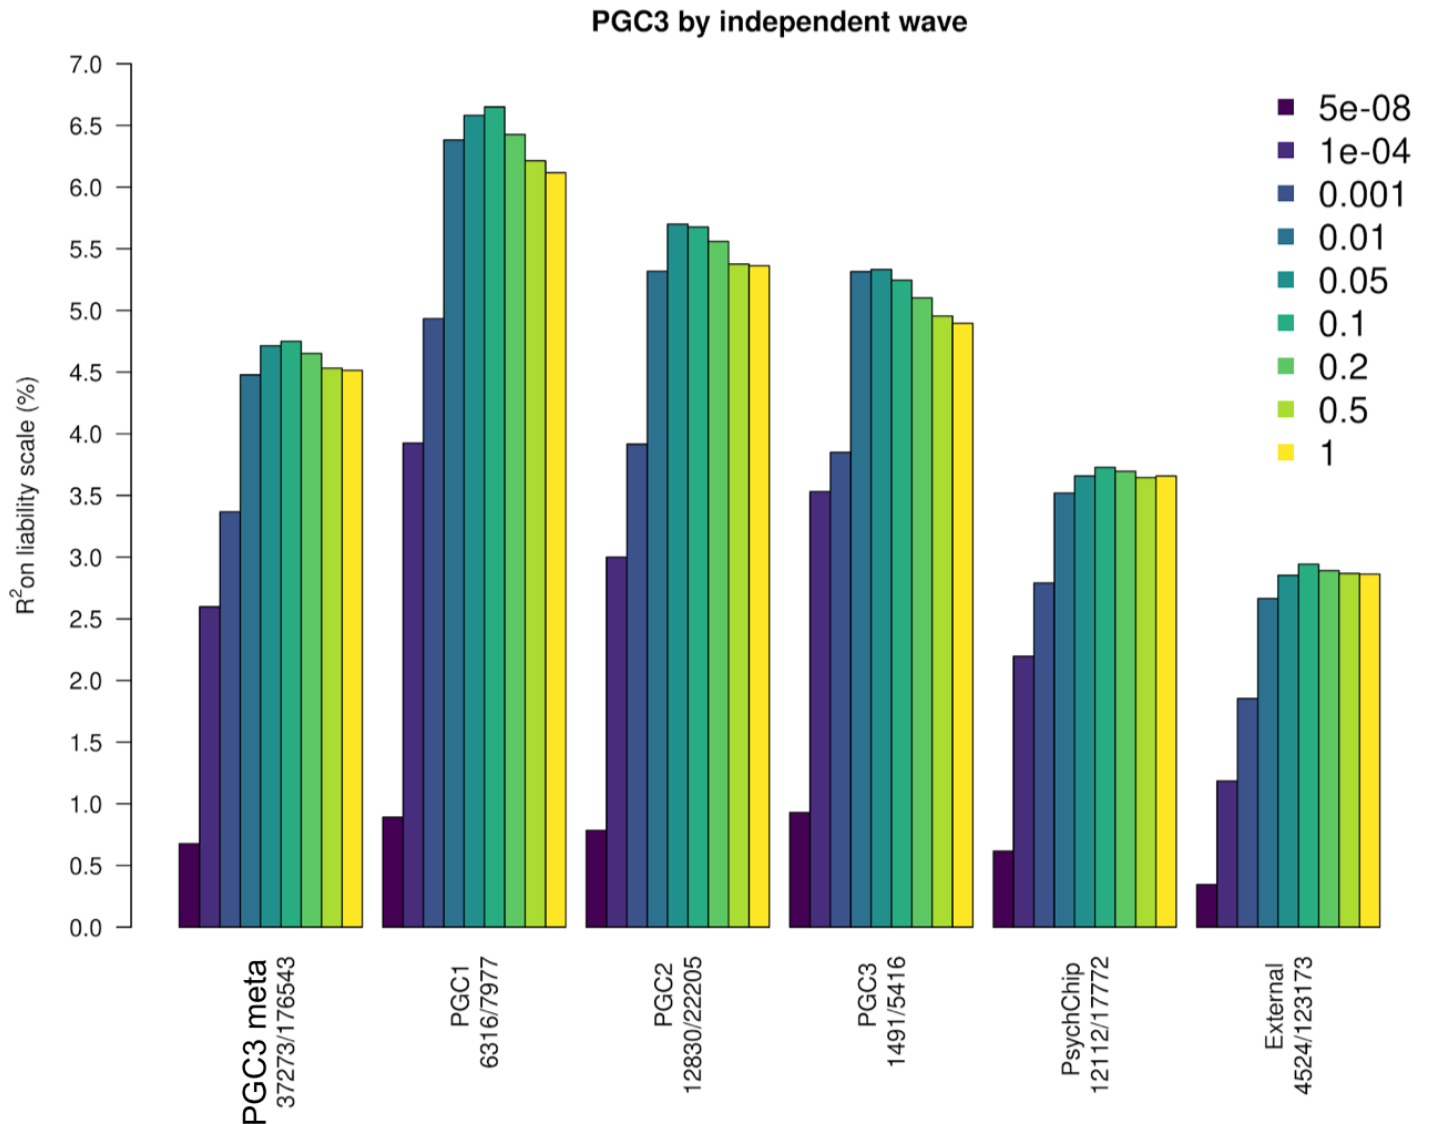

**Supplementary Figure 7: Phenotypic variance in bipolar disorder explained by polygenic risk scores per independent wave of ascertainment to the PGC**

Variance explained is presented on the liability scale, assuming a BD population prevalence of 2%. The results shown are the weighted average  $R^2$  values within each wave, calculated weighted by the effective N per cohort. The numbers of cases and controls are shown under the barplot for each wave. The color of the bars represents the P value threshold used to select SNPs from the discovery GWAS. The leftmost barplot (“PGC3 meta”) shows the combined results of all waves (PGC1, PGC2, PGC3, PsychChip, and External datasets) and matches the European ancestry barplot in Figure 2.

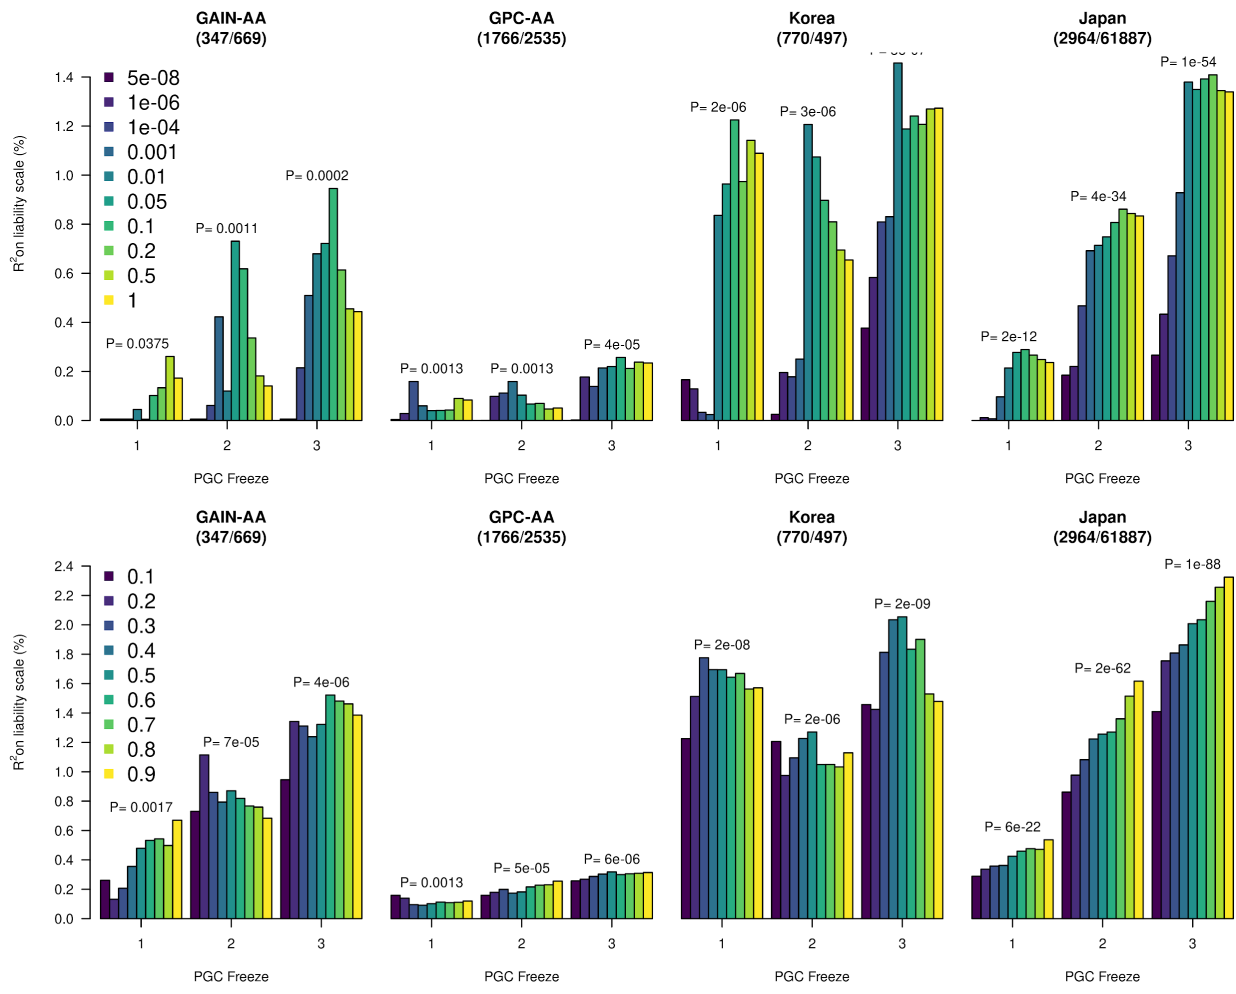

**Supplementary Figure 8: Increase of phenotypic variance in bipolar disorder explained by polygenic risk scores in independent non-European datasets as European discovery sample size increases**

Variance explained is presented on the liability scale, assuming a BD population prevalence of 2%. The numbers of cases and controls are shown under the name of each test dataset. For each target dataset, we plot prediction performance as the PGC BD sample size has increased across freezes of the data. Top panel: Optimization of p-value threshold in each dataset while setting the LD-clumping threshold to 0.1. The color of the bars represents the P value threshold used to select SNPs from the discovery GWAS. Bottom panel: Optimization of LD-clumping threshold in each dataset while setting the p-value threshold to the optimal for each dataset selected in the top panel. The color of the bars represents the LD threshold used to clump SNPs from the discovery GWAS. P-values for association of BD-PRS with case-control status are shown for the best setting above each set of results.



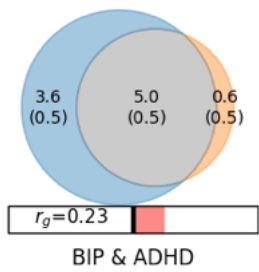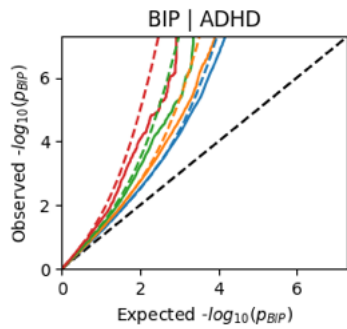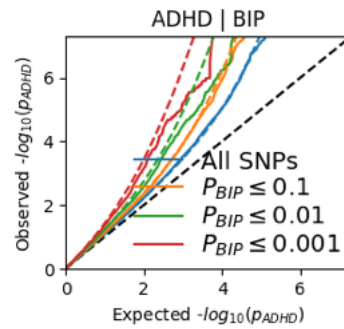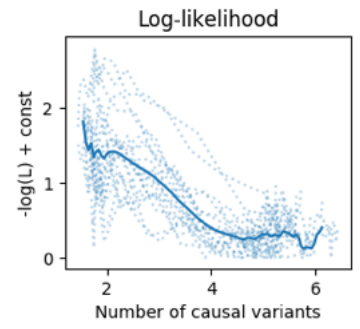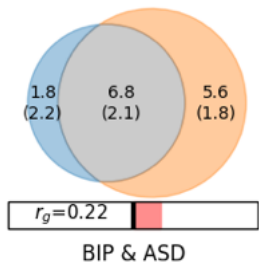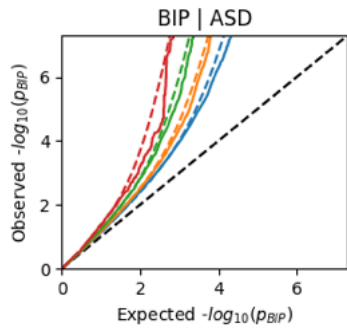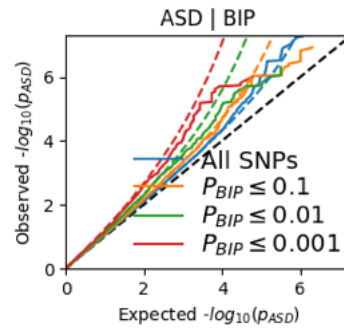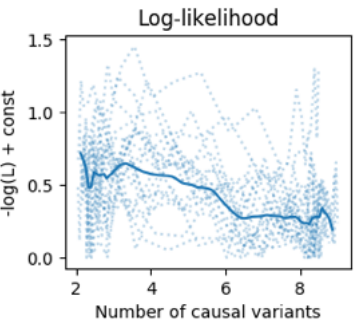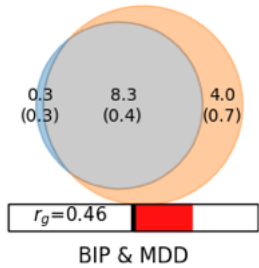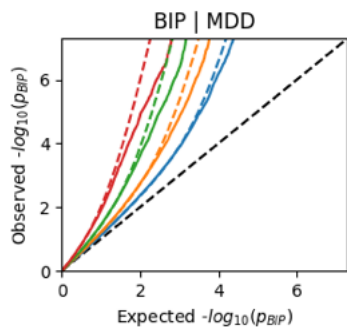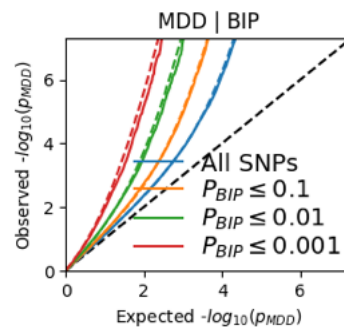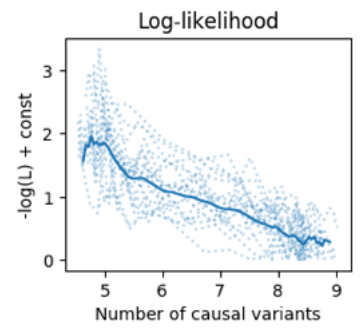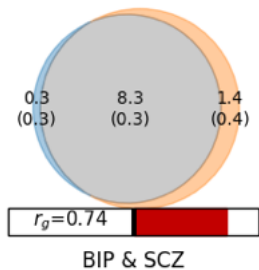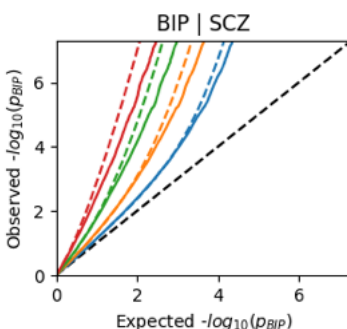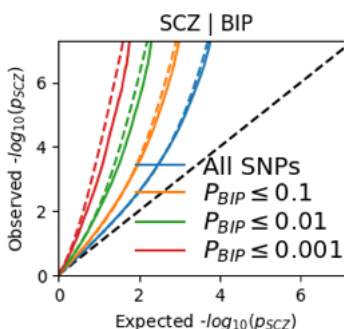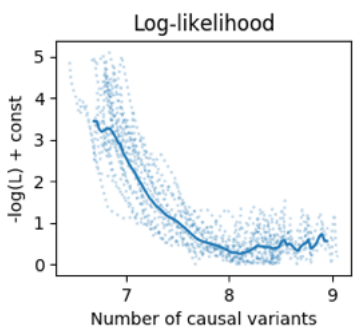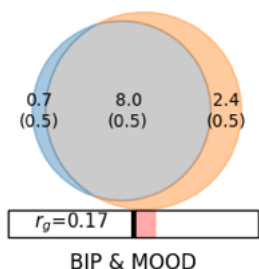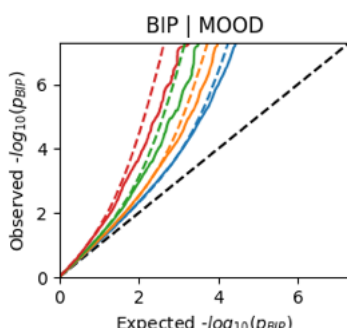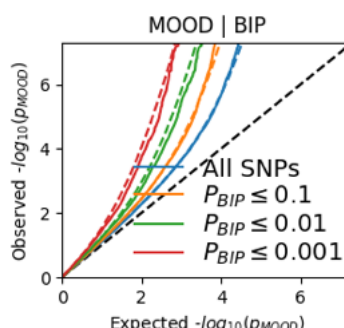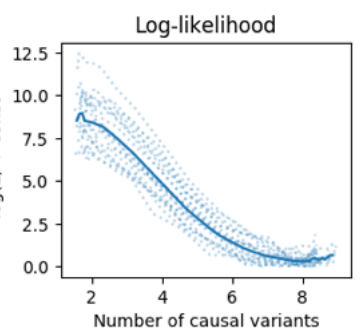

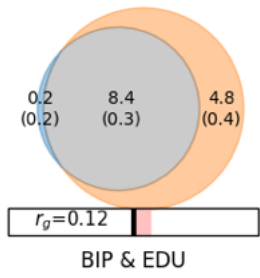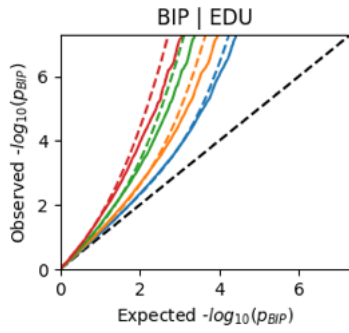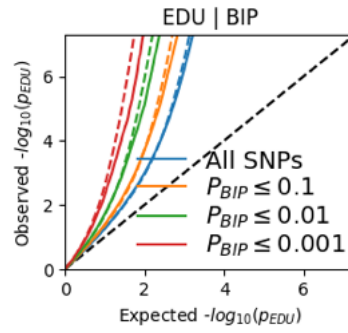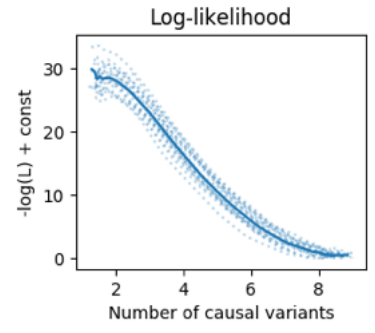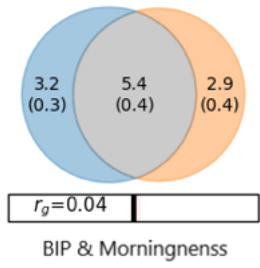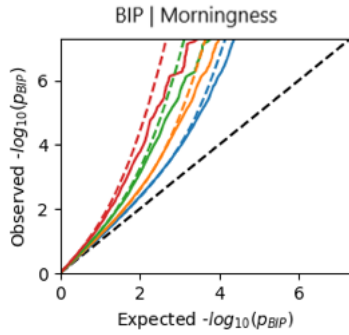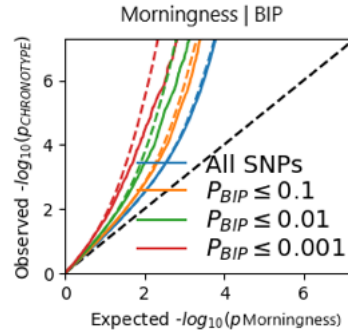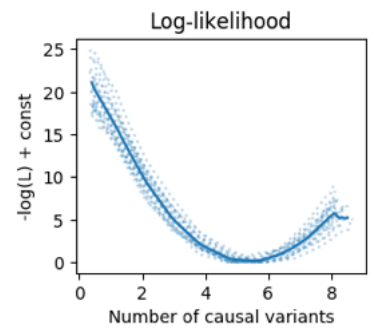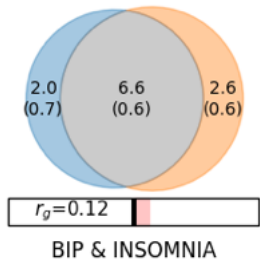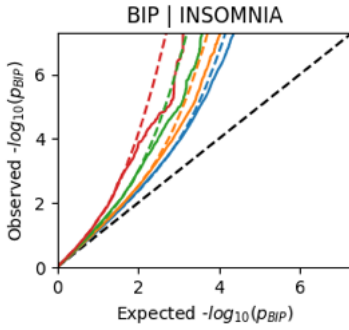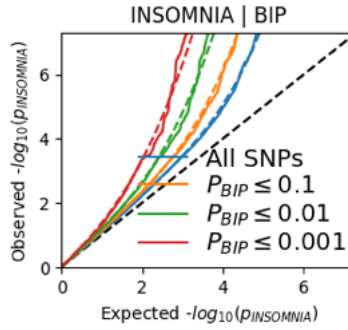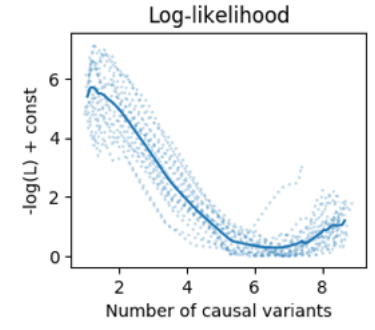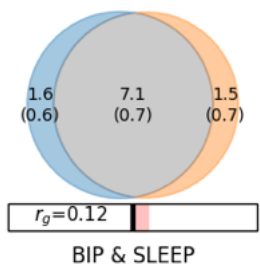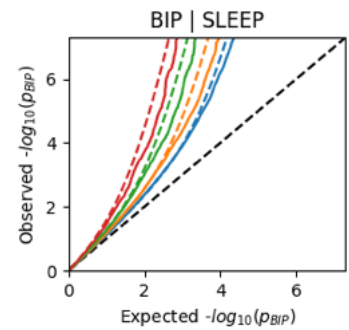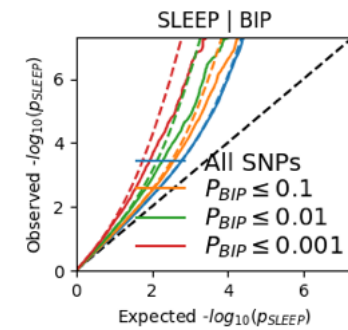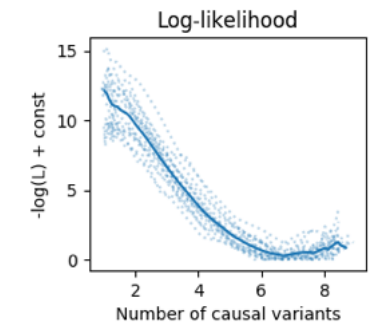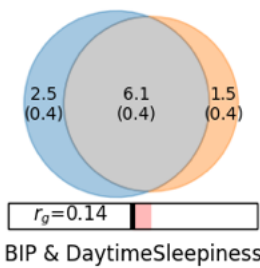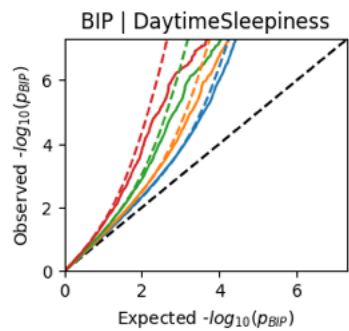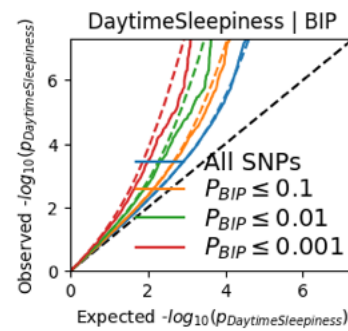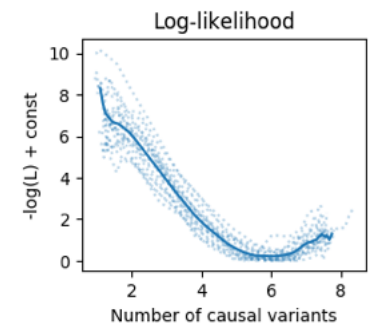

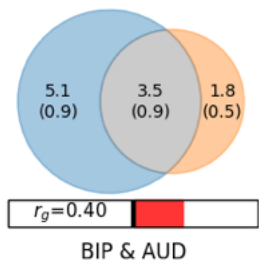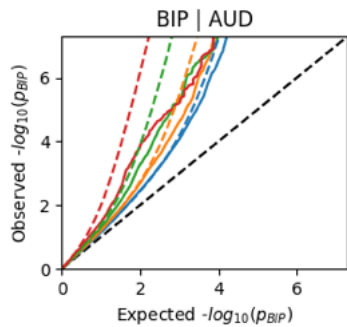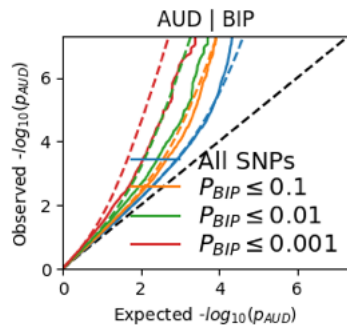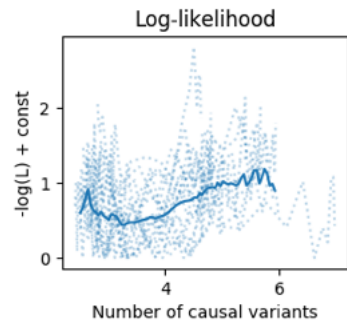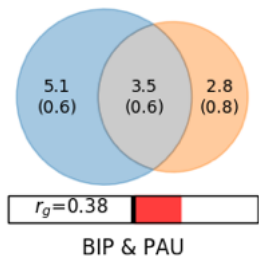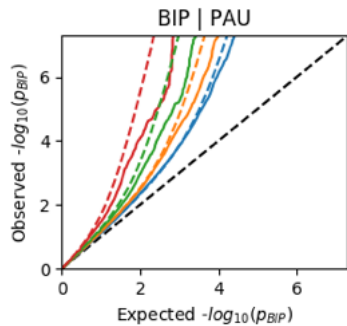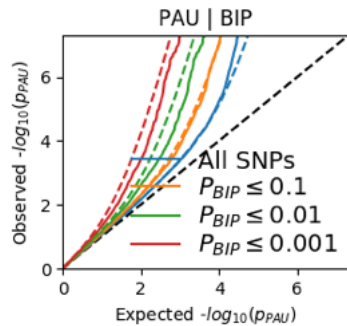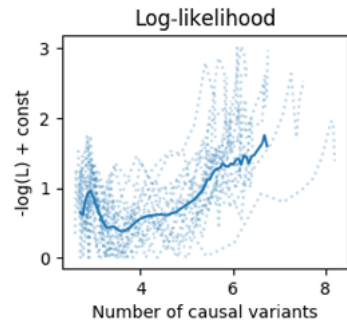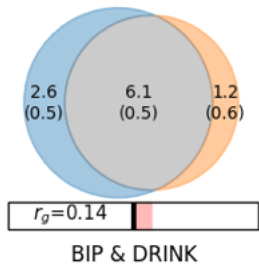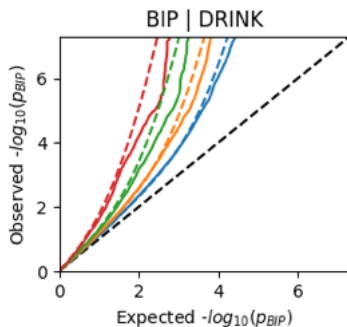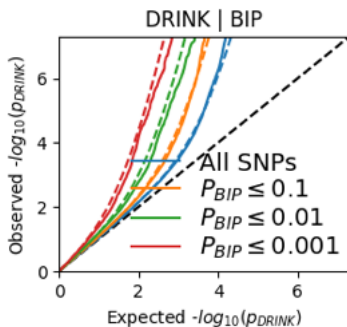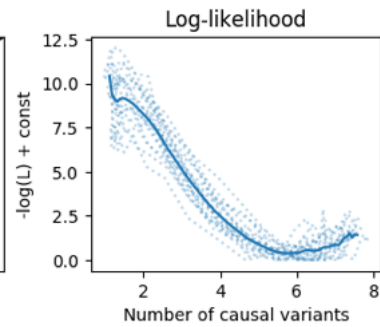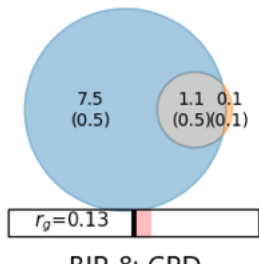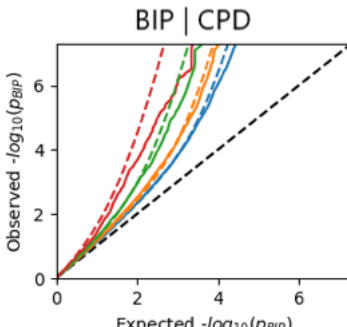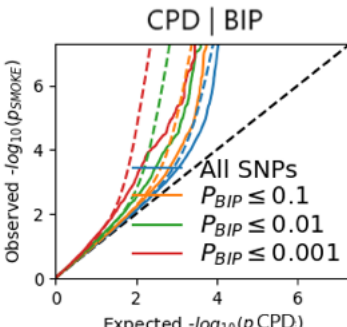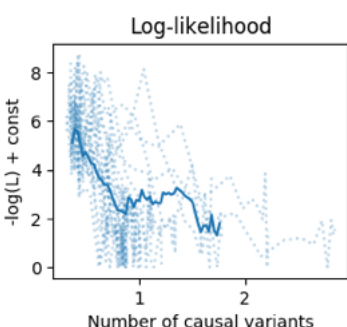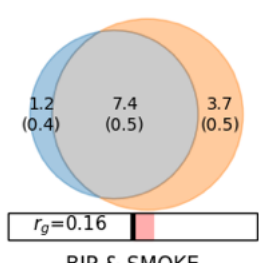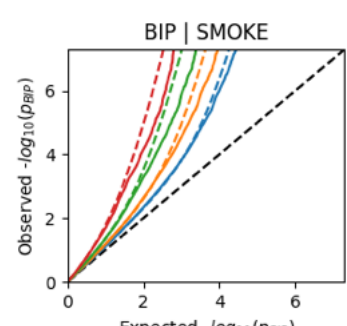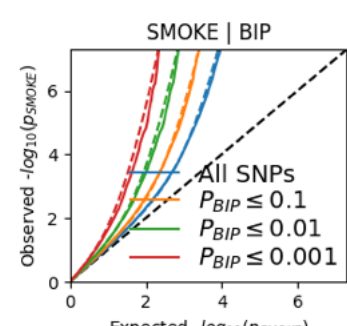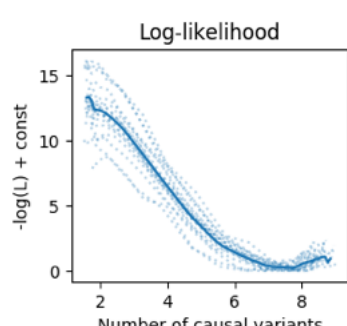

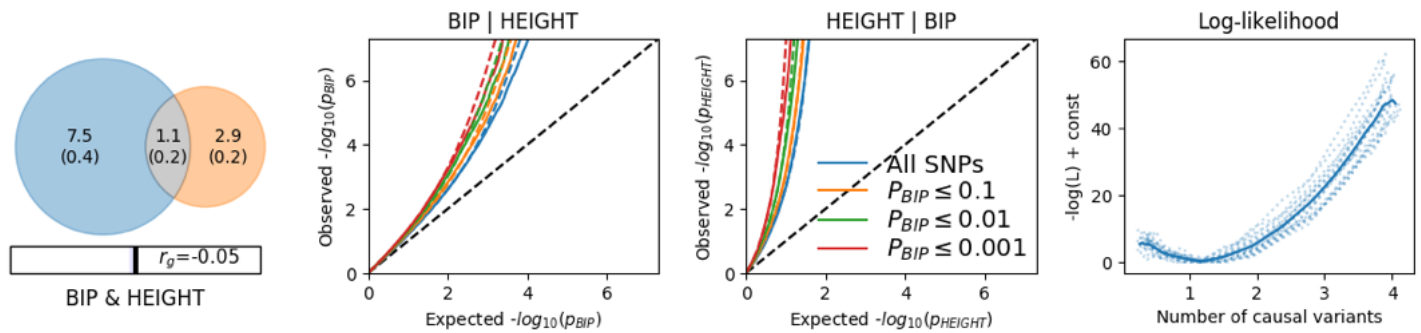

### Supplementary Figure 9: Bivariate MiXeR results comparing bipolar disorder (BD) to other traits of interest

Venn diagrams depict the estimated number of influencing variants shared (grey) between BD and each trait of interest and unique (colors) to either of them. The number of causal variants in thousands is shown. The size of the circles reflects the polygenicity of each trait, with larger circles corresponding to greater polygenicity and vice versa. The estimated genetic correlation ( $r_g$ ) for each pair is also shown below the corresponding Venn diagram, with an accompanying scale (negative; blue shades, positive; red shades). Conditional quantile-quantile (Q-Q) plots are shown of observed versus expected  $-\log_{10}$  p-values in the primary trait (e.g. BD) as a function of significance of association with a secondary trait (e.g. ADHD) at the level of  $p \leq 0.1$  (orange lines),  $p \leq 0.01$  (green lines),  $p \leq 0.001$  (red lines). Blue line indicates all SNPs. Dotted lines in blue, orange, green, and red indicate model predictions for each stratum. Black dotted line is the expected Q-Q plot under null (no SNPs associated with the phenotype). Log-likelihood curves of the bivariate fit as a function of the  $\pi_{12}$  parameter. The remaining parameters of the model were constrained to their fitted values. The minimum point indicates the fitted  $\pi_{12}$  parameter. ASD, autism spectrum disorder. EDU, educational attainment. AUD, alcohol use disorder. PAU, problematic alcohol use. DRINK, drinks per week. CPD, cigarettes per day, . MOOD, mood instability. SLEEP, sleep duration. SMOKE, smoking initiation.
